# Supplementary material for: Connection Between Chromosomal Location and Function of CtrA Phosphorelay Genes in Alphaproteobacteria
Source: Front Microbiol. 2021 Apr 29;12:662907. doi: 10.3389/fmicb.2021.662907 (PMC8116508; doi:10.3389/fmicb.2021.662907)
Supplement: Supplementary file 2 [file Data_Sheet_2.xlsx]

## Sheet: Supplementary Table S1
Order	Species	Accession	CckA	CcrM	ChpT	Clp	CtrA	DivL	DnaA	GcrA	ParA	ParB
Caulobacterales	Brevundimonas diminuta	GCA_004102925.1	1	1	1	1	1	1	0	0	1	1
Caulobacterales	Brevundimonas naejangsanensis	GCA_000635915.2	1	1	1	1	1	1	1	1	1	1
Caulobacterales	Brevundimonas sp. GW460-12-10-14-LB2	GCA_001636925.1	1	1	1	1	1	1	1	1	1	1
Caulobacterales	Brevundimonas vesicularis	GCA_002208825.2	1	1	1	1	1	1	1	1	1	1
Caulobacterales	Caulobacter segnis	GCA_003015125.1	1	1	1	1	1	1	1	1	1	1
Caulobacterales	Caulobacteraceae bacterium OTSz_A_272	GCA_001679665.1	0	1	0	1	1	1	1	1	1	1
Caulobacterales	Caulobacter crescentus NA1000	GCA_000022005.1	1	1	1	1	1	1	1	1	1	1
Caulobacterales	Caulobacter sp. K31	GCA_000019145.1	1	1	1	1	1	1	1	1	1	1
Rhizobiales	Agrobacterium fabrum	GCA_003667725.1	1	1	1	1	1	2	1	1	1	1
Rhizobiales	Agrobacterium tumefaciens	GCA_003666445.1	1	1	1	1	1	2	1	1	1	1
Rhizobiales	Aminobacter aminovorans	GCA_001605015.1	1	1	1	1	1	2	1	1	1	1
Rhizobiales	Bartonella ancashensis	GCA_001281405.1	1	1	1	1	0	2	1	1	1	1
Rhizobiales	Bartonella apis	GCA_002007565.1	1	1	1	1	1	2	1	1	1	1
Rhizobiales	Bartonella bacilliformis	GCA_001559035.2	1	1	1	1	1	2	1	1	1	1
Rhizobiales	Bartonella elizabethae	GCA_900638615.1	1	1	1	1	1	2	1	1	1	1
Rhizobiales	Bartonella henselae str. Houston-1	GCA_000046705.1	1	1	1	1	1	2	1	1	1	1
Rhizobiales	Bartonella quintana str. Toulouse	GCA_000046685.1	1	1	1	1	1	2	1	1	1	1
Rhizobiales	Bartonella sp. 1-1C	GCA_002810325.1	1	1	1	1	1	2	1	1	1	1
Rhizobiales	Bartonella sp. A1379B	GCA_002022485.1	1	1	1	1	1	2	1	1	1	1
Rhizobiales	Bartonella sp. JB15	GCA_002022605.1	1	1	1	1	1	2	1	1	1	1
Rhizobiales	Bartonella sp. JB63	GCA_002022665.1	1	1	1	1	1	2	1	1	1	1
Rhizobiales	Bartonella sp. Raccoon60	GCA_002022585.1	1	1	1	1	1	2	1	1	1	1
Rhizobiales	Bartonella sp. WD16.2	GCA_002022505.1	1	1	1	1	1	2	1	1	0	1
Rhizobiales	Bartonella vinsonii subsp. berkhoffii str. Winnie	GCA_000341385.1	1	1	1	1	1	2	1	1	1	1
Rhizobiales	Beijerinckia indica subsp. indica ATCC 9039	GCA_000019845.1	1	1	1	1	1	1	1	1	0	0
Rhizobiales	Bosea sp. Tri-49	GCA_003952665.1	1	1	1	1	1	2	1	1	1	1
Rhizobiales	Bradyrhizobium cosmicum	GCA_000284275.1	1	1	1	1	1	2	1	1	1	1
Rhizobiales	Bradyrhizobium diazoefficiens	GCA_001549695.1	1	1	1	1	1	2	1	1	1	1
Rhizobiales	Bradyrhizobium japonicum	GCA_000807315.1	1	1	1	1	1	2	1	1	1	1
Rhizobiales	Bradyrhizobium ottawaense	GCA_002278135.2	1	0	1	1	1	2	1	1	1	1
Rhizobiales	Bradyrhizobium sp.	GCA_900011245.1	1	1	1	1	1	2	1	0	1	1
Rhizobiales	Bradyrhizobium sp. SK17	GCA_002831585.1	1	1	1	1	1	2	1	1	1	1
Rhizobiales	Bradyrhizobium vignae	GCA_900324035.1	1	1	1	1	1	2	1	1	1	1
Rhizobiales	Brucella abortus bv. 1 str. 9-941	GCA_000008145.1	1	1	1	1	1	2	1	1	1	1
Rhizobiales	Brucella canis ATCC 23365	GCA_000018525.1	1	1	1	1	1	2	1	1	1	1
Rhizobiales	Brucella melitensis ATCC 23457	GCA_000022625.1	1	1	1	1	1	2	1	1	1	1
Rhizobiales	Brucella microti CCM 4915	GCA_000022745.1	1	1	1	1	1	2	1	1	1	1
Rhizobiales	Brucella pinnipedialis B2/94	GCA_000221005.1	1	1	1	1	1	2	1	1	1	1
Rhizobiales	Brucella sp. 09RB8910	GCA_001971805.1	1	1	1	1	1	2	1	1	1	1
Rhizobiales	Brucella sp. 2002734562	GCA_001715385.1	1	1	1	1	1	2	1	1	1	1
Rhizobiales	Brucella suis 1330	GCA_000007505.1	1	1	1	1	1	2	1	1	1	1
Rhizobiales	Candidatus Liberibacter asiaticus str. psy62	GCA_000023765.2	1	1	1	1	0	2	1	1	1	1
Rhizobiales	Chelatococcus sp. CO-6	GCA_001271345.1	1	1	1	1	1	2	1	1	1	1
Rhizobiales	Devosia sp. I507	GCA_002949085.1	1	1	1	1	1	1	1	0	1	1
Rhizobiales	Ensifer adhaerens	GCA_000697965.2	1	1	1	1	1	2	1	1	1	1
Rhizobiales	Hartmannibacter diazotrophicus	GCA_900231165.1	1	1	1	1	1	2	1	1	1	1
Rhizobiales	Hyphomicrobium nitrativorans NL23	GCA_000503895.1	1	1	1	1	1	1	1	1	1	1
Rhizobiales	Liberibacter crescens	GCA_001543305.1	1	1	1	1	1	1	1	1	1	1
Rhizobiales	Martelella endophytica	GCA_000960975.1	1	1	1	1	1	2	1	0	1	1
Rhizobiales	Martelella mediterranea DSM 17316	GCA_002043005.1	1	1	1	1	1	1	1	0	1	1
Rhizobiales	Mesorhizobium ciceri	GCA_001618825.1	1	1	1	1	1	2	1	1	1	1
Rhizobiales	Mesorhizobium loti NZP2037	GCA_001676765.1	1	1	1	1	1	2	1	1	1	1
Rhizobiales	Mesorhizobium sp. M2A.F.Ca.ET.043.02.1.1	GCA_003952405.1	1	1	1	1	1	2	1	1	1	1
Rhizobiales	Mesorhizobium sp. M2A.F.Ca.ET.043.05.1.1	GCA_003952445.1	1	1	1	1	1	2	1	1	1	1
Rhizobiales	Mesorhizobium sp. M2A.F.Ca.ET.046.03.2.1	GCA_003952425.1	1	1	1	1	1	2	1	1	1	1
Rhizobiales	Mesorhizobium sp. WSM1497	GCA_001672455.2	1	1	1	1	1	2	1	1	1	1
Rhizobiales	Methylobacterium durans	GCA_003173715.1	1	1	1	1	1	1	1	1	1	1
Rhizobiales	Methylobacterium sp. 17Sr1-43	GCA_003173735.1	1	1	1	1	1	1	1	0	1	1
Rhizobiales	Methylobacterium sp. XJLW	GCA_003254375.1	1	1	1	1	1	2	1	1	1	1
Rhizobiales	Methylocystis bryophila	GCA_002117405.1	1	1	1	1	1	1	1	1	1	1
Rhizobiales	Methylosinus trichosporium OB3b	GCA_002752655.1	1	1	1	1	1	2	1	1	1	1
Rhizobiales	Methylovirgula ligni	GCA_004135935.1	1	1	1	1	1	2	1	1	1	1
Rhizobiales	Neorhizobium galegae bv. officinalis bv. officinalis str. HAMBI 1141	GCA_000731295.1	1	1	1	1	1	2	1	1	1	1
Rhizobiales	Neorhizobium sp. NCHU2750	GCA_003597675.1	1	1	1	1	1	2	1	1	1	1
Rhizobiales	Neorhizobium sp. SOG26	GCA_003491345.1	1	1	1	1	1	2	1	0	1	1
Rhizobiales	Ochrobactrum anthropi	GCA_000742955.1	1	1	1	1	1	2	1	1	1	1
Rhizobiales	Ochrobactrum pseudogrignonense	GCA_001652485.1	1	1	1	1	1	2	1	1	1	1
Rhizobiales	Pleomorphomonas sp. SM30	GCA_003966995.1	0	1	1	1	1	2	1	1	1	1
Rhizobiales	Pseudorhodoplanes sinuspersici	GCA_002119765.1	1	1	1	1	1	2	1	1	1	1
Rhizobiales	Rhizobium jaguaris	GCA_003627755.1	1	1	1	1	1	2	1	1	1	1
Rhizobiales	Rhizobium leguminosarum bv. trifolii WSM2304	GCA_000021345.1	1	1	1	1	1	2	1	1	1	1
Rhizobiales	Rhizobium sp. NT-26	GCA_000967425.1	1	1	1	1	1	2	1	1	1	1
Rhizobiales	Rhodobiaceae bacterium	GCA_003330885.1	1	1	1	1	1	1	1	1	1	1
Rhizobiales	Rhodoplanes sp. Z2-YC6860	GCA_001579845.1	1	1	1	1	1	2	1	1	1	1
Rhizobiales	Shinella sp. HZN7	GCA_001652565.1	1	1	1	1	1	2	1	1	1	1
Rhizobiales	Sinorhizobium fredii NGR234	GCA_000018545.1	1	1	1	1	1	2	1	1	1	1
Rhizobiales	Sinorhizobium meliloti	GCA_002197045.1	1	1	1	1	1	2	1	1	1	1
Rhizobiales	Sinorhizobium sp. CCBAU 05631	GCA_002288505.1	1	1	1	1	1	2	1	1	1	1
Rhizobiales	Starkeya novella DSM 506	GCA_000092925.1	1	1	1	1	1	2	1	1	1	1
Rhizobiales	Sinorhizobium meliloti 1021	GCA_000006965.1	1	1	1	1	1	1	1	1	1	1
Rhizobiales	Agrobacterium fabrum str. C58	GCA_000092025.1	1	1	1	1	1	1	1	1	1	1
Rhodobacterales	Celeribacter ethanolicus	GCA_002407265.1	1	1	1	1	1	1	1	1	1	1
Rhodobacterales	Celeribacter marinus	GCA_001308265.1	1	1	1	1	1	1	1	1	1	1
Rhodobacterales	Defluviimonas alba	GCA_001620265.1	1	1	0	1	1	2	1	1	1	1
Rhodobacterales	Dinoroseobacter shibae DFL 12 = DSM 16493	GCA_000018145.1	1	1	1	1	1	3	1	1	1	1
Rhodobacterales	Epibacterium mobile	GCA_900574125.1	1	1	1	1	1	1	1	1	1	1
Rhodobacterales	Gemmobacter sp. HYN0069	GCA_003060865.1	0	1	1	1	1	1	1	1	1	1
Rhodobacterales	Ketogulonicigenium robustum	GCA_002117445.1	0	1	1	1	1	1	1	0	1	1
Rhodobacterales	Ketogulonicigenium vulgare Y25	GCA_000164885.1	0	1	1	1	1	1	1	0	1	1
Rhodobacterales	Leisingera sp. NJS204	GCA_004123675.1	1	1	1	1	1	3	1	1	1	1
Rhodobacterales	Marinovum algicola DG 898	GCA_001046955.1	1	1	1	1	1	1	1	1	1	1
Rhodobacterales	Marivivens sp. JLT3646	GCA_001908835.1	0	1	1	1	1	1	1	1	1	1
Rhodobacterales	Octadecabacter antarcticus 307	GCA_000155675.2	1	1	0	1	1	1	1	1	1	1
Rhodobacterales	Octadecabacter arcticus 238	GCA_000155735.2	1	1	1	1	1	0	1	1	0	1
Rhodobacterales	Octadecabacter temperatus	GCA_001187845.1	1	1	1	1	1	1	1	1	1	1
Rhodobacterales	Pannonibacter phragmitetus	GCA_001484065.1	0	1	0	1	1	0	1	1	1	1
Rhodobacterales	Paracoccus jeotgali	GCA_002865605.1	0	1	1	1	1	1	1	0	1	1
Rhodobacterales	Paracoccus mutanolyticus	GCA_003285265.1	0	1	0	1	0	1	1	0	1	1
Rhodobacterales	Paracoccus sp. Arc7-R13	GCA_004010775.1	1	1	1	1	1	1	1	1	1	1
Rhodobacterales	Paracoccus sp. BM15	GCA_002847305.1	1	1	1	1	1	1	1	1	1	1
Rhodobacterales	Paracoccus yeei	GCA_002073635.2	0	1	0	1	1	1	1	0	1	1
Rhodobacterales	Paracoccus zhejiangensis	GCA_002847445.1	0	1	1	1	1	2	1	1	1	1
Rhodobacterales	Phaeobacter gallaeciensis DSM 26640	GCA_000511385.1	1	1	1	1	1	3	1	1	1	1
Rhodobacterales	Phaeobacter inhibens 2.10	GCA_000154745.2	1	1	1	1	1	3	1	1	1	1
Rhodobacterales	Phaeobacter piscinae	GCA_002407245.1	1	1	1	1	1	3	1	1	1	1
Rhodobacterales	Phaeobacter sp. LSS9	GCA_003443595.1	1	1	1	1	1	2	1	1	1	1
Rhodobacterales	Planktomarina temperata RCA23	GCA_000738435.1	0	1	1	1	1	0	1	1	1	1
Rhodobacterales	Rhodobaca barguzinensis	GCA_001870665.2	1	1	1	1	1	2	1	1	1	1
Rhodobacterales	Rhodobacter blasticus	GCA_003071405.1	1	1	1	1	1	2	1	1	1	1
Rhodobacterales	Rhodobacter capsulatus SB 1003	GCA_000021865.1	1	1	1	1	1	2	1	0	1	1
Rhodobacterales	Rhodobacter sphaeroides ATCC 17029	GCA_000015985.1	1	1	0	1	1	2	1	1	1	1
Rhodobacterales	Rhodobacteraceae bacterium	GCA_002850435.1	0	1	1	1	1	1	1	1	1	1
Rhodobacterales	Rhodobacteraceae bacterium SH-1	GCA_003008555.1	1	1	1	1	1	2	1	1	1	1
Rhodobacterales	Rhodovulum sulfidophilum	GCA_001548075.1	1	1	1	1	1	2	1	1	1	1
Rhodobacterales	Roseobacter denitrificans OCh 114	GCA_000014045.1	1	1	1	1	1	2	1	1	1	1
Rhodobacterales	Roseobacter litoralis Och 149	GCA_000154785.2	1	1	1	1	1	2	1	1	1	1
Rhodobacterales	Ruegeria pomeroyi DSS-3	GCA_000011965.2	1	1	1	1	1	2	1	1	1	1
Rhodobacterales	Sulfitobacter pseudonitzschiae	GCA_002222635.1	1	1	1	1	0	2	1	1	1	1
Rhodobacterales	Sulfitobacter sp. AM1-D1	GCA_001886735.1	0	1	0	1	1	2	1	1	1	1
Rhodobacterales	Sulfitobacter sp. D7	GCA_003611275.1	0	1	1	1	1	1	1	1	1	1
Rhodobacterales	Sulfitobacter sp. JL08	GCA_003352045.1	1	1	1	1	1	2	1	1	1	1
Rhodobacterales	Sulfitobacter sp. SK025	GCA_003352105.1	1	1	0	1	1	2	1	1	1	1
Rhodobacterales	Tabrizicola piscis	GCA_003940805.1	1	1	1	1	1	2	1	1	1	1
Rhodobacterales	Thioclava nitratireducens	GCA_001940525.2	1	1	1	1	1	2	1	1	1	1
Rhodobacterales	Yangia sp. CCB-MM3	GCA_001687105.1	1	1	1	1	1	2	1	0	1	1
Rhodospirillales	Acetobacter ascendens	GCA_002173775.1	0	1	0	1	1	0	1	1	1	1
Rhodospirillales	Acetobacter oryzifermentans	GCA_001628715.1	0	1	0	1	1	0	1	1	1	1
Rhodospirillales	Acetobacter oryzifermentans	GCA_002220195.1	0	1	0	1	1	0	1	1	1	1
Rhodospirillales	Acetobacter oryzoeni	GCA_004014775.2	0	1	0	1	1	0	1	1	1	1
Rhodospirillales	Acetobacter pasteurianus IFO 3283-01	GCA_000010825.1	0	1	0	1	1	0	1	1	1	1
Rhodospirillales	Acetobacter persici	GCA_002006565.1	0	1	0	1	0	0	1	1	1	1
Rhodospirillales	Acetobacter pomorum	GCA_002456135.1	0	1	0	1	1	0	1	1	1	1
Rhodospirillales	Acetobacter senegalensis	GCA_001499615.1	0	1	0	1	1	0	1	1	1	1
Rhodospirillales	Acetobacter sp. JWB	GCA_003323795.1	0	1	0	1	1	0	1	1	1	1
Rhodospirillales	Acetobacteraceae bacterium	GCA_004843165.1	0	1	0	1	0	0	1	0	1	1
Rhodospirillales	Acidiphilium cryptum JF-5	GCA_000016725.1	0	1	0	1	1	0	1	0	1	1
Rhodospirillales	Acidiphilium multivorum AIU301	GCA_000202835.1	0	1	0	1	1	0	1	0	1	1
Rhodospirillales	Asaia bogorensis NBRC 16594	GCA_001547995.1	0	1	0	1	1	0	1	1	1	1
Rhodospirillales	Azospirillum brasilense	GCA_001315015.1	1	0	0	1	0	1	1	1	1	1
Rhodospirillales	Azospirillum oryzae	GCA_013347285.1	1	0	0	1	0	1	1	1	1	1
Rhodospirillales	Azospirillum sp. TSA2s	GCA_004923315.1	1	0	0	1	0	1	1	1	1	1
Rhodospirillales	Azospirillum sp. TSH58	GCA_003119115.1	1	0	0	1	0	1	1	1	1	1
Rhodospirillales	Azospirillum thermophilum	GCA_003130795.1	1	0	0	0	0	0	0	0	0	0
Rhodospirillales	Azospirillum thiophilum	GCA_001305595.1	1	0	0	1	0	1	1	1	1	1
Rhodospirillales	Bombella sp. KACC 21507	GCA_009906835.1	0	1	0	0	1	0	1	1	1	1
Rhodospirillales	Candidatus Endolissoclinum faulkneri L2	GCA_000319385.1	0	0	0	1	0	0	0	0	0	0
Rhodospirillales	Defluviicoccus sp.	GCA_013414705.1	1	1	1	1	1	0	0	1	1	0
Rhodospirillales	Ferrovibrio terrae	GCA_007197755.1	1	1	1	1	1	1	1	0	1	1
Rhodospirillales	Gluconacetobacter diazotrophicus PA1 5	GCA_000067045.1	0	1	0	1	0	0	1	1	1	1
Rhodospirillales	Gluconobacter oxydans 621H	GCA_000011685.1	0	1	0	1	1	0	1	1	1	1
Rhodospirillales	Granulibacter bethesdensis CGDNIH1	GCA_000014285.2	0	1	0	1	0	0	1	1	1	1
Rhodospirillales	Hypericibacter adhaerens	GCA_008728835.1	1	1	1	1	1	1	1	0	1	1
Rhodospirillales	Komagataeibacter nataicola	GCA_002009295.1	0	1	0	1	1	0	1	1	1	1
Rhodospirillales	Komagataeibacter saccharivorans	GCA_004348195.1	0	1	0	1	1	0	1	1	1	1
Rhodospirillales	Komagataeibacter xylinus E25	GCA_000550765.1	0	1	0	1	1	0	1	1	1	1
Rhodospirillales	Kozakia baliensis	GCA_001787335.1	0	1	0	1	1	0	1	1	1	1
Rhodospirillales	Magnetospira sp. QH-2 (marine magnetic spirillum QH-2)	GCA_000968135.1	1	1	1	1	1	0	1	0	1	1
Rhodospirillales	Magnetospirillum magneticum AMB-1	GCA_000009985.1	1	1	1	1	1	1	1	0	1	0
Rhodospirillales	Neoasaia chiangmaiensis	GCA_002005465.1	0	1	0	1	1	0	1	1	1	1
Rhodospirillales	Niveispirillum cyanobacteriorum	GCA_002868735.1	0	1	1	0	1	1	1	1	1	1
Rhodospirillales	Rhodospirillum centenum SW	GCA_000016185.1	1	1	1	1	1	1	1	1	1	1
Rhodospirillales	Rhodospirillum rubrum ATCC 11170	GCA_000013085.1	1	1	1	1	1	1	1	0	1	1
Rhodospirillales	Stella humosa	GCA_006738645.1	0	1	0	1	0	0	1	0	1	1
Rhodospirillales	Swingsia samuiensis	GCA_006542355.1	0	1	0	1	1	0	1	1	1	1
Rhodospirillales	Swingsia sp. F3b2	GCA_006542395.2	0	1	0	1	1	0	1	1	1	1
Rhodospirillales	Thalassospira indica	GCA_003403095.1	1	1	1	1	1	1	1	1	1	1
Rhodospirillales	Thalassospira marina	GCA_002844375.1	1	1	1	1	1	1	1	1	1	1
Rhodospirillales	Thalassospira xiamenensis M-5 = DSM 17429	GCA_000300235.2	1	1	1	1	1	1	1	1	1	1
Rhodospirillales	Tistrella mobilis KA081020-065	GCA_000264455.2	0	1	1	1	1	1	1	0	1	1
Sphingomonadales	Novosphingobium pentaromativorans US6-1	GCA_000767465.1	1	1	1	1	1	1	1	1	1	1
Sphingomonadales	Sphingobium indicum B90A	GCA_000264945.2	1	1	1	1	1	1	1	1	1	1
Sphingomonadales	Sphingomonas sanxanigenens DSM 19645 = NX02	GCA_000512205.2	1	1	1	1	1	1	1	1	1	1
Sphingomonadales	Sphingomonas taxi	GCA_000764535.1	1	1	1	1	1	1	1	0	1	1
Sphingomonadales	Sphingomonas wittichii DC-6	GCA_000715175.2	1	1	1	1	1	1	1	1	1	1
Sphingomonadales	Sphingomonas wittichii RW1	GCA_000016765.1	1	1	1	1	1	1	1	1	1	1
Sphingomonadales	Sphingopyxis alaskensis RB2256	GCA_000013985.1	1	1	1	1	1	1	1	1	1	1
Sphingomonadales	Sphingopyxis fribergensis	GCA_000803645.1	1	1	1	1	1	1	1	1	1	1
Sphingomonadales	Sphingopyxis macrogoltabida	GCA_001307295.1	1	1	1	1	1	1	1	1	1	1
Sphingomonadales	Zymomonas mobilis subsp. mobilis NCIMB 11163	GCA_000024245.1	1	1	1	1	1	1	1	1	1	1

## Sheet: Supplementary Table S2
Order	Species	Accession	ProteinID	Product	Replicon	start	end	strand	LocusTag	Ostart	Pstart	Group
Caulobacterales	Brevundimonas diminuta	GCA_004102925.1	QAT14290.1	site-specific DNA-methyltransferase	CP035093.1	1574814	1575893	-	EQG53_07870	776773	21.8697	CcrM
Caulobacterales	Brevundimonas diminuta	GCA_004102925.1	QAT13598.1	chromosome partitioning protein ParA	CP035093.1	807129	807935	+	EQG53_04060	9088	0.255869	ParA
Caulobacterales	Brevundimonas diminuta	GCA_004102925.1	QAT14690.1	ATP-dependent Clp protease ATP-binding subunit ClpX	CP035093.1	2035883	2037151	+	EQG53_10150	1237842	34.8509	ClpX
Caulobacterales	Brevundimonas diminuta	GCA_004102925.1	QAT13599.1	ParB/RepB/Spo0J family partition protein	CP035093.1	807966	808853	+	EQG53_04065	9925	0.279434	ParB
Caulobacterales	Brevundimonas diminuta	GCA_004102925.1	QAT16032.1	PAS domain-containing protein	CP035093.1	732894	735218	-	EQG53_03725	3486672	98.1658	DivL
Caulobacterales	Brevundimonas diminuta	GCA_004102925.1	QAT13727.1	histidine phosphotransferase	CP035093.1	940192	940905	+	EQG53_04755	142151	4.0022	ChpT
Caulobacterales	Brevundimonas diminuta	GCA_004102925.1	QAT16083.1	response regulator	CP035093.1	1543357	1545363	+	EQG53_07730	745316	20.9841	CckA
Caulobacterales	Brevundimonas diminuta	GCA_004102925.1	QAT15866.1	response regulator transcription factor	CP035093.1	3417812	3418513	-	EQG53_16780	2619771	73.7586	CtrA
Caulobacterales	Brevundimonas naejangsanensis	GCA_000635915.2	ANF53926.1	ATP-dependent protease ATP-binding subunit ClpX	CP015614.1	765515	766783	+	DA69_03685	1173687	39.4977	ClpX
Caulobacterales	Brevundimonas naejangsanensis	GCA_000635915.2	ANF55442.1	chromosome partitioning protein ParA	CP015614.1	2553841	2554677	-	DA69_12260	2962013	99.6796	ParA
Caulobacterales	Brevundimonas naejangsanensis	GCA_000635915.2	ANF56031.1	GcrA cell cycle regulator	CP015614.1	2805853	2806395	-	DA69_13445	242490	8.16043	GcrA
Caulobacterales	Brevundimonas naejangsanensis	GCA_000635915.2	ANF53588.1	modification methylase	CP015614.1	351645	352724	-	DA69_01690	759817	25.5698	CcrM
Caulobacterales	Brevundimonas naejangsanensis	GCA_000635915.2	ANF55990.1	histidine phosphotransferase	CP015614.1	2431573	2432253	-	DA69_11665	2839745	95.5649	ChpT
Caulobacterales	Brevundimonas naejangsanensis	GCA_000635915.2	ANF54917.1	DNA-binding response regulator	CP015614.1	1957735	1958436	-	DA69_09265	2365907	79.619	CtrA
Caulobacterales	Brevundimonas naejangsanensis	GCA_000635915.2	ANF55441.1	chromosome partitioning protein ParB	CP015614.1	2552923	2553810	-	DA69_12255	2961095	99.6487	ParB
Caulobacterales	Brevundimonas naejangsanensis	GCA_000635915.2	ANF56023.1	chromosomal replication initiation protein DnaA	CP015614.1	2758686	2760131	-	DA69_13215	195323	6.57313	DnaA
Caulobacterales	Brevundimonas naejangsanensis	GCA_000635915.2	ANF55951.1	hybrid sensor histidine kinase/response regulator	CP015614.1	1980340	1982424	-	DA69_09395	2388512	80.3797	CckA
Caulobacterales	Brevundimonas naejangsanensis	GCA_000635915.2	ANF55386.1	two-component sensor histidine kinase	CP015614.1	2484149	2486476	-	DA69_11930	2892321	97.3342	DivL
Caulobacterales	Brevundimonas sp. GW460-12-10-14-LB2	GCA_001636925.1	ANC55068.1	modification methylase	CP015511.1	300874	301965	-	A4249_01590	801955	24.5714	CcrM
Caulobacterales	Brevundimonas sp. GW460-12-10-14-LB2	GCA_001636925.1	ANC54611.1	chromosome partitioning protein ParB	CP015511.1	2772395	2773303	+	A4249_13725	9701	0.297232	ParB
Caulobacterales	Brevundimonas sp. GW460-12-10-14-LB2	GCA_001636925.1	ANC54610.1	chromosome partitioning protein ParA	CP015511.1	2771570	2772388	+	A4249_13720	8876	0.271955	ParA
Caulobacterales	Brevundimonas sp. GW460-12-10-14-LB2	GCA_001636925.1	ANC54876.1	hybrid sensor histidine kinase/response regulator	CP015511.1	3083902	3085953	+	A4249_15245	321208	9.84161	CckA
Caulobacterales	Brevundimonas sp. GW460-12-10-14-LB2	GCA_001636925.1	ANC53332.1	ATP-dependent Clp protease ATP-binding subunit ClpX	CP015511.1	1318706	1319974	-	A4249_06480	1819787	55.7571	ClpX
Caulobacterales	Brevundimonas sp. GW460-12-10-14-LB2	GCA_001636925.1	ANC54899.1	chromosomal replication initiation protein DnaA	CP015511.1	3114896	3116350	-	A4249_15375	352202	10.7912	DnaA
Caulobacterales	Brevundimonas sp. GW460-12-10-14-LB2	GCA_001636925.1	ANC55262.1	GcrA cell cycle regulator	CP015511.1	2399497	2400033	+	A4249_11950	2900578	88.8719	GcrA
Caulobacterales	Brevundimonas sp. GW460-12-10-14-LB2	GCA_001636925.1	ANC54014.1	DNA-binding response regulator	CP015511.1	2073955	2074656	-	A4249_10335	2575036	78.8975	CtrA
Caulobacterales	Brevundimonas sp. GW460-12-10-14-LB2	GCA_001636925.1	ANC54775.1	two-component sensor histidine kinase	CP015511.1	2972487	2974808	+	A4249_14685	209793	6.42792	DivL
Caulobacterales	Brevundimonas sp. GW460-12-10-14-LB2	GCA_001636925.1	ANC54879.1	histidine phosphotransferase	CP015511.1	3087257	3087928	-	A4249_15260	324563	9.9444	ChpT
Caulobacterales	Brevundimonas vesicularis	GCA_002208825.2	ASE38635.1	site-specific DNA-methyltransferase	CP022048.2	658175	659266	+	CEP68_03465	2352502	70.3178	CcrM
Caulobacterales	Brevundimonas vesicularis	GCA_002208825.2	ASE39539.1	ParA family protein	CP022048.2	1660113	1660931	+	CEP68_08495	8913	0.266415	ParA
Caulobacterales	Brevundimonas vesicularis	GCA_002208825.2	ASE39905.1	histidine phosphotransferase	CP022048.2	2060977	2061648	-	CEP68_10535	409777	12.2485	ChpT
Caulobacterales	Brevundimonas vesicularis	GCA_002208825.2	ASE39046.1	GcrA cell cycle regulator	CP022048.2	1132957	1133493	+	CEP68_05790	2827284	84.5094	GcrA
Caulobacterales	Brevundimonas vesicularis	GCA_002208825.2	ASE39540.1	ParB/RepB/Spo0J family partition protein	CP022048.2	1660956	1661846	+	CEP68_08500	9756	0.291613	ParB
Caulobacterales	Brevundimonas vesicularis	GCA_002208825.2	ASE40837.1	ATP-dependent Clp protease ATP-binding subunit ClpX	CP022048.2	3138928	3140196	+	CEP68_15840	1487728	44.4692	ClpX
Caulobacterales	Brevundimonas vesicularis	GCA_002208825.2	ASE39927.1	chromosomal replication initiator protein DnaA	CP022048.2	2090519	2091973	-	CEP68_10660	439319	13.1315	DnaA
Caulobacterales	Brevundimonas vesicularis	GCA_002208825.2	ASE39902.1	hybrid sensor histidine kinase/response regulator	CP022048.2	2057623	2059674	+	CEP68_10520	406423	12.1483	CckA
Caulobacterales	Brevundimonas vesicularis	GCA_002208825.2	ASE40151.1	DNA-binding response regulator	CP022048.2	2319072	2319773	+	CEP68_11895	667872	19.9631	CtrA
Caulobacterales	Brevundimonas vesicularis	GCA_002208825.2	ASE39797.1	sensor histidine kinase	CP022048.2	1945451	1947772	+	CEP68_09955	294251	8.79536	DivL
Caulobacterales	Caulobacter crescentus NA1000	GCA_000022005.1	ACL93475.1	chromosome replication initiator protein DnaA	CP001340.1	5636	7108	+	CCNA_00008	5636	0.139404	DnaA
Caulobacterales	Caulobacter crescentus NA1000	GCA_000022005.1	ACL93849.1	adenine-specific methyltransferase ccrM	CP001340.1	398637	399713	-	CCNA_00382	398637	9.8601	CcrM
Caulobacterales	Caulobacter crescentus NA1000	GCA_000022005.1	ACL94597.1	sensory transduction histidine kinase/receiver protein CckA	CP001340.1	1235738	1237813	+	CCNA_01132	1235738	30.5654	CckA
Caulobacterales	Caulobacter crescentus NA1000	GCA_000022005.1	ACL95504.1	ATP-dependent endopeptidase clp%2C ATP-binding subunit ClpX	CP001340.1	2183866	2185128	-	CCNA_02039	2183866	54.0169	ClpX
Caulobacterales	Caulobacter crescentus NA1000	GCA_000022005.1	ACL95793.2	cell cycle sigma 70 cofactor GcrA	CP001340.1	2470434	2470955	+	CCNA_02328	2470434	61.1051	GcrA
Caulobacterales	Caulobacter crescentus NA1000	GCA_000022005.1	ACL96595.1	cell cycle response regulator CtrA	CP001340.1	3278952	3279647	-	CCNA_03130	3278952	81.1034	CtrA
Caulobacterales	Caulobacter crescentus NA1000	GCA_000022005.1	ACL97049.2	histidine phosphotransferase ChpT	CP001340.1	3739999	3740676	+	CCNA_03584	3739999	92.5072	ChpT
Caulobacterales	Caulobacter crescentus NA1000	GCA_000022005.1	ACL97063.1	two-component sensor histidine kinase DivL	CP001340.1	3750296	3752605	+	CCNA_03598	3750296	92.7619	DivL
Caulobacterales	Caulobacter crescentus NA1000	GCA_000022005.1	ACL97333.2	chromosome partitioning protein ParB	CP001340.1	4030549	4031463	-	CCNA_03868	4030549	99.6938	ParB
Caulobacterales	Caulobacter crescentus NA1000	GCA_000022005.1	ACL97334.1	chromosome partitioning protein ParA	CP001340.1	4031502	4032305	-	CCNA_03869	4031502	99.7174	ParA
Caulobacterales	Caulobacter segnis	GCA_003015125.1	AVQ04218.1	ParB/RepB/Spo0J family partition protein	CP027850.1	4627236	4628150	+	B7G68_21630	11778	0.252993	ParB
Caulobacterales	Caulobacter segnis	GCA_003015125.1	AVQ04217.1	ParA family protein	CP027850.1	4626379	4627182	+	B7G68_21625	10921	0.234584	ParA
Caulobacterales	Caulobacter segnis	GCA_003015125.1	AVQ04028.1	histidine phosphotransferase	CP027850.1	4422205	4422966	+	B7G68_20560	4462214	95.8489	ChpT
Caulobacterales	Caulobacter segnis	GCA_003015125.1	AVQ03578.1	DNA-binding response regulator	CP027850.1	3856479	3857174	-	B7G68_18065	3896488	83.697	CtrA
Caulobacterales	Caulobacter segnis	GCA_003015125.1	AVQ02418.1	ATP-dependent Clp protease ATP-binding subunit ClpX	CP027850.1	2459012	2460274	-	B7G68_11540	2499021	53.6793	ClpX
Caulobacterales	Caulobacter segnis	GCA_003015125.1	AVQ00590.1	PAS domain-containing protein	CP027850.1	234079	236388	+	B7G68_01160	274088	5.88744	DivL
Caulobacterales	Caulobacter segnis	GCA_003015125.1	AVQ00384.1	chromosomal replication initiator protein DnaA	CP027850.1	23	1498	+	B7G68_00005	40032	0.859892	DnaA
Caulobacterales	Caulobacter segnis	GCA_003015125.1	AVQ04497.1	hybrid sensor histidine kinase/response regulator	CP027850.1	3467593	3469671	-	B7G68_16260	3507602	75.3437	CckA
Caulobacterales	Caulobacter segnis	GCA_003015125.1	AVQ00713.1	site-specific DNA-methyltransferase	CP027850.1	364552	365628	-	B7G68_01840	404561	8.69002	CcrM
Caulobacterales	Caulobacter segnis	GCA_003015125.1	AVQ03013.1	GcrA cell cycle regulator	CP027850.1	3153024	3153545	+	B7G68_14840	3193033	68.5867	GcrA
Caulobacterales	Caulobacter sp. K31	GCA_000019145.1	ABZ69139.1	chromosomal replication initiator protein DnaA	CP000927.1	389	1852	+	Caul_0001	389	0.0071013	DnaA
Caulobacterales	Caulobacter sp. K31	GCA_000019145.1	ABZ69235.1	conserved hypothetical protein	CP000927.1	107735	108427	-	Caul_0097	107735	1.96673	ChpT
Caulobacterales	Caulobacter sp. K31	GCA_000019145.1	ABZ70156.1	two component transcriptional regulator%2C winged helix family	CP000927.1	1086755	1087450	+	Caul_1026	1086755	19.839	CtrA
Caulobacterales	Caulobacter sp. K31	GCA_000019145.1	ABZ70358.1	GcrA cell cycle regulator	CP000927.1	1290343	1290861	-	Caul_1228	1290343	23.5556	GcrA
Caulobacterales	Caulobacter sp. K31	GCA_000019145.1	ABZ70515.1	integral membrane sensor hybrid histidine kinase	CP000927.1	1469920	1472007	+	Caul_1385	1469920	26.8338	CckA
Caulobacterales	Caulobacter sp. K31	GCA_000019145.1	ABZ71973.1	ATP-dependent Clp protease%2C ATP-binding subunit ClpX	CP000927.1	3085645	3086907	-	Caul_2846	3085645	56.3293	ClpX
Caulobacterales	Caulobacter sp. K31	GCA_000019145.1	ABZ73487.1	DNA methylase N-4/N-6 domain protein	CP000927.1	4743157	4744233	+	Caul_4367	4743157	86.5876	CcrM
Caulobacterales	Caulobacter sp. K31	GCA_000019145.1	ABZ73954.1	PAS/PAC sensor signal transduction histidine kinase	CP000927.1	5231050	5233362	+	Caul_4834	5231050	95.4942	DivL
Caulobacterales	Caulobacter sp. K31	GCA_000019145.1	ABZ74146.1	Cobyrinic acid ac-diamide synthase	CP000927.1	5429519	5430331	+	Caul_5026	5429519	99.1173	ParA
Caulobacterales	Caulobacter sp. K31	GCA_000019145.1	ABZ74147.1	parB-like partition protein	CP000927.1	5430418	5431311	+	Caul_5027	5430418	99.1337	ParB
Caulobacterales	Caulobacteraceae bacterium OTSz_A_272	GCA_001679665.1	ANP45047.1	modification methylase	CP013244.1	660440	661528	+	ATE48_03480	2383431	63.8524	CcrM
Caulobacterales	Caulobacteraceae bacterium OTSz_A_272	GCA_001679665.1	ANP46306.1	chromosome partitioning protein ParA	CP013244.1	2022865	2023653	+	ATE48_10450	13137	0.351942	ParA
Caulobacterales	Caulobacteraceae bacterium OTSz_A_272	GCA_001679665.1	ANP46307.1	hypothetical protein	CP013244.1	2023770	2024819	+	ATE48_10455	14042	0.376187	ParB
Caulobacterales	Caulobacteraceae bacterium OTSz_A_272	GCA_001679665.1	ANP44448.1	ATP-dependent Clp protease ATP-binding subunit ClpX	CP013244.1	28389	29657	+	ATE48_00175	1751380	46.9197	ClpX
Caulobacterales	Caulobacteraceae bacterium OTSz_A_272	GCA_001679665.1	ANP46413.1	hypothetical protein	CP013244.1	2139930	2141321	+	ATE48_11035	130202	3.48813	DnaA
Caulobacterales	Caulobacteraceae bacterium OTSz_A_272	GCA_001679665.1	ANP45425.1	GcrA cell cycle regulator	CP013244.1	1040067	1040576	-	ATE48_05590	2763058	74.0227	GcrA
Caulobacterales	Caulobacteraceae bacterium OTSz_A_272	GCA_001679665.1	ANP46677.1	two-component system response regulator	CP013244.1	2441291	2442013	-	ATE48_12500	431563	11.5616	CtrA
Caulobacterales	Caulobacteraceae bacterium OTSz_A_272	GCA_001679665.1	ANP46644.1	tyrosine protein kinase	CP013244.1	2392610	2395036	+	ATE48_12310	382882	10.2575	DivL
Rhizobiales	Agrobacterium fabrum	GCA_003667725.1	AYM58517.1	chromosome partitioning protein%2C ParB family	CP033022.1	2580979	2581860	-	At1D132_25030	2898744	99.6992	ParB
Rhizobiales	Agrobacterium fabrum	GCA_003667725.1	AYM56114.1	GcrA cell cycle regulator	CP033022.1	105523	106056	-	At1D132_00970	423288	14.5585	GcrA
Rhizobiales	Agrobacterium fabrum	GCA_003667725.1	AYM56494.1	cell cycle regulated site-specific DNA-methyltransferase protein	CP033022.1	483601	484746	+	At1D132_04770	801366	27.5621	CcrM
Rhizobiales	Agrobacterium fabrum	GCA_003667725.1	AYM58518.1	chromosome partitioning protein	CP033022.1	2581890	2582684	-	At1D132_25040	2899655	99.7305	ParA
Rhizobiales	Agrobacterium fabrum	GCA_003667725.1	AYM57065.1	two-component system%2C cell cycle sensor histidine kinase and response regulator CckA	CP033022.1	1059831	1062416	+	At1D132_10480	1377596	47.3809	CckA
Rhizobiales	Agrobacterium fabrum	GCA_003667725.1	AYM56670.1	two component response regulator	CP033022.1	652138	652809	+	At1D132_06530	969903	33.3588	CtrA
Rhizobiales	Agrobacterium fabrum	GCA_003667725.1	AYM56966.1	ATP-dependent Clp protease ATP-binding subunit ClpX	CP033022.1	951382	952659	+	At1D132_09490	1269147	43.6509	ClpX
Rhizobiales	Agrobacterium fabrum	GCA_003667725.1	AYM56682.1	two-component system%2C cell cycle sensor histidine kinase PleC	CP033022.1	667848	670184	-	At1D132_06650	985613	33.8991	DivL
Rhizobiales	Agrobacterium fabrum	GCA_003667725.1	AYM58142.1	histidine phosphotransferase ChpT	CP033022.1	2155621	2156268	-	At1D132_21250	2473386	85.0694	ChpT
Rhizobiales	Agrobacterium fabrum	GCA_003667725.1	AYM58551.1	two component sensor kinase	CP033022.1	2618960	2621605	-	At1D132_25370	29234	1.00547	DivL
Rhizobiales	Agrobacterium fabrum	GCA_003667725.1	AYM56018.1	chromosomal replication initiator protein DnaA	CP033022.1	1	1563	+	At1D132_00010	317766	10.9292	DnaA
Rhizobiales	Agrobacterium fabrum str. C58	GCA_000092025.1	AAK85852.1	two component sensor kinase	AE007869.2	29028	31673	-	Atu0027	29028	1.02154	divL
Rhizobiales	Agrobacterium fabrum str. C58	GCA_000092025.1	AAK86141.2	chromosomal replication initiator protein DnaA	AE007869.2	317547	319109	+	Atu0324	317547	11.175	dnaA
Rhizobiales	Agrobacterium fabrum str. C58	GCA_000092025.1	AAK86602.2	cell cycle regulated site-specific DNA-methyltransferase protein	AE007869.2	790755	791900	+	Atu0794	790755	27.828	ccrM
Rhizobiales	Agrobacterium fabrum str. C58	GCA_000092025.1	AAK87055.1	ATP-dependent Clp protease%2C ATP-binding subunit	AE007869.2	1247190	1248467	+	Atu1259	1247190	43.8907	clp
Rhizobiales	Agrobacterium fabrum str. C58	GCA_000092025.1	AAK87154.1	two component sensor kinase	AE007869.2	1355121	1357706	+	Atu1362	1355121	47.689	cckA
Rhizobiales	Agrobacterium fabrum str. C58	GCA_000092025.1	AAK88170.1	two component response regulator	AE007869.2	2405136	2405840	+	Atu2434	2405136	84.6408	ctrA
Rhizobiales	Agrobacterium fabrum str. C58	GCA_000092025.1	AAK88175.1	conserved hypothetical protein	AE007869.2	2408307	2408954	-	Atu2438	2408307	84.7524	chpT
Rhizobiales	Agrobacterium fabrum str. C58	GCA_000092025.1	AAK88539.2	chromosome Partitioning Protein	AE007869.2	2832629	2833510	-	Atu2828	2832629	99.685	parB
Rhizobiales	Agrobacterium fabrum str. C58	GCA_000092025.1	AAK88540.1	Chromosome partitioning protein	AE007869.2	2833540	2834334	-	Atu2829	2833540	99.7171	parA
Rhizobiales	Agrobacterium fabrum str. C58	GCF_000092025.1	WP_006310679.1	GcrA family cell cycle regulator	AE007869.2	423064	423597	-	ATU_RS02050	423064	14.8883	gcrA
Rhizobiales	Agrobacterium tumefaciens	GCA_003666445.1	AYM04350.1	GcrA cell cycle regulator	CP032926.1	116980	117513	-	At1D1460_01070	434416	15.1499	GcrA
Rhizobiales	Agrobacterium tumefaciens	GCA_003666445.1	AYM06725.1	chromosome partitioning protein	CP032926.1	2542176	2542970	-	At1D1460_24830	2859612	99.7267	ParA
Rhizobiales	Agrobacterium tumefaciens	GCA_003666445.1	AYM04672.1	cell cycle regulated site-specific DNA-methyltransferase protein	CP032926.1	450493	451638	+	At1D1460_04300	767929	26.7809	CcrM
Rhizobiales	Agrobacterium tumefaciens	GCA_003666445.1	AYM06758.1	two component sensor kinase	CP032926.1	2579253	2581835	-	At1D1460_25160	29240	1.01972	DivL
Rhizobiales	Agrobacterium tumefaciens	GCA_003666445.1	AYM05121.1	ATP-dependent Clp protease ATP-binding subunit ClpX	CP032926.1	896095	897372	+	At1D1460_08790	1213531	42.3209	ClpX
Rhizobiales	Agrobacterium tumefaciens	GCA_003666445.1	AYM06320.1	histidine phosphotransferase ChpT	CP032926.1	2088982	2089629	-	At1D1460_20780	2406418	83.9219	ChpT
Rhizobiales	Agrobacterium tumefaciens	GCA_003666445.1	AYM06724.1	chromosome partitioning protein%2C ParB family	CP032926.1	2541264	2542145	-	At1D1460_24820	2858700	99.6949	ParB
Rhizobiales	Agrobacterium tumefaciens	GCA_003666445.1	AYM04848.1	two component response regulator	CP032926.1	616535	617206	+	At1D1460_06060	933971	32.5715	CtrA
Rhizobiales	Agrobacterium tumefaciens	GCA_003666445.1	AYM04861.1	two-component system%2C cell cycle sensor histidine kinase PleC	CP032926.1	632773	635109	-	At1D1460_06190	950209	33.1378	DivL
Rhizobiales	Agrobacterium tumefaciens	GCA_003666445.1	AYM04244.1	chromosomal replication initiator protein DnaA	CP032926.1	1	1560	+	At1D1460_00010	317437	11.0704	DnaA
Rhizobiales	Agrobacterium tumefaciens	GCA_003666445.1	AYM05224.1	two-component system%2C cell cycle sensor histidine kinase and response regulator CckA	CP032926.1	1005471	1008053	+	At1D1460_09820	1322907	46.1353	CckA
Rhizobiales	Aminobacter aminovorans	GCA_001605015.1	AMS43722.1	modification methylase	CP015005.1	4922393	4923526	-	AA2016_4813	4079103	72.531	CcrM
Rhizobiales	Aminobacter aminovorans	GCA_001605015.1	AMS39700.1	alkaline phosphatase	CP015005.1	809737	812286	-	AA2016_0762	5590393	99.4034	DivL
Rhizobiales	Aminobacter aminovorans	GCA_001605015.1	AMS43587.1	histidine kinase	CP015005.1	4764936	4767266	+	AA2016_4677	3921646	69.7312	DivL
Rhizobiales	Aminobacter aminovorans	GCA_001605015.1	AMS44215.1	GcrA cell cycle regulator	CP015005.1	5423387	5423905	+	AA2016_5309	4580097	81.4392	GcrA
Rhizobiales	Aminobacter aminovorans	GCA_001605015.1	AMS42924.1	ATP-dependent protease	CP015005.1	4095455	4096729	-	AA2016_4007	3252165	57.8271	ClpX
Rhizobiales	Aminobacter aminovorans	GCA_001605015.1	AMS41248.1	histidine phosphotransferase	CP015005.1	2375220	2375849	-	AA2016_2322	1531930	27.2394	ChpT
Rhizobiales	Aminobacter aminovorans	GCA_001605015.1	AMS39748.1	chromosome partitioning protein ParB	CP015005.1	853727	854608	+	AA2016_0810	10437	0.185581	ParB
Rhizobiales	Aminobacter aminovorans	GCA_001605015.1	AMS39747.1	chromosome partitioning protein ParA	CP015005.1	852896	853693	+	AA2016_0809	9606	0.170805	ParA
Rhizobiales	Aminobacter aminovorans	GCA_001605015.1	AMS38944.1	chromosomal replication initiation protein	CP015005.1	418	1953	+	AA2016_0001	4781074	85.0128	DnaA
Rhizobiales	Aminobacter aminovorans	GCA_001605015.1	AMS43600.1	transcriptional regulator	CP015005.1	4782342	4783007	-	AA2016_4690	3939052	70.0407	CtrA
Rhizobiales	Aminobacter aminovorans	GCA_001605015.1	AMS42364.1	PAS sensor protein	CP015005.1	3509982	3512582	+	AA2016_3442	2666692	47.4167	CckA
Rhizobiales	Bartonella ancashensis	GCA_001281405.1	ALE03557.1	Signal transduction histidine kinase	CP010401.1	777749	778387	+	PU02_0743	292363	19.9199	ChpT
Rhizobiales	Bartonella ancashensis	GCA_001281405.1	ALE03295.1	sensor	CP010401.1	517006	519459	-	PU02_0481	31620	2.1544	DivL
Rhizobiales	Bartonella ancashensis	GCA_001281405.1	ALE03749.1	Sensor histidine kinase	CP010401.1	1000606	1003155	+	PU02_0935	515220	35.104	CckA
Rhizobiales	Bartonella ancashensis	GCA_001281405.1	ALE03260.1	Chromosome (plasmid) partitioning protein ParB	CP010401.1	478411	479307	-	PU02_0446	1460720	99.5248	ParB
Rhizobiales	Bartonella ancashensis	GCA_001281405.1	ALE03927.1	ATP-dependent Clp protease ATP-binding subunit ClpX	CP010401.1	1209922	1211196	-	PU02_1113	724536	49.3656	ClpX
Rhizobiales	Bartonella ancashensis	GCA_001281405.1	ALE03364.1	GcrA cell cycle regulator	CP010401.1	605832	606365	+	PU02_0550	120446	8.20647	GcrA
Rhizobiales	Bartonella ancashensis	GCA_001281405.1	ALE04028.1	Two-component sensor histidine kinase PleC	CP010401.1	1322384	1324711	+	PU02_1214	836998	57.0281	DivL
Rhizobiales	Bartonella ancashensis	GCA_001281405.1	ALE03373.1	Chromosomal replication initiator protein DnaA	CP010401.1	613662	615224	+	PU02_0559	128276	8.73996	DnaA
Rhizobiales	Bartonella ancashensis	GCA_001281405.1	ALE04047.1	Modification methylase	CP010401.1	1345171	1346307	-	PU02_1233	859785	58.5806	CcrM
Rhizobiales	Bartonella ancashensis	GCA_001281405.1	ALE03261.1	Chromosome (plasmid) partitioning protein ParA	CP010401.1	479353	480150	-	PU02_0447	1461662	99.5889	ParA
Rhizobiales	Bartonella apis	GCA_002007565.1	AQT46396.1	Global cell cycle regulator GcrA	CP015625.1	296813	297376	+	BBC0122_002580	296812	10.2095	GcrA
Rhizobiales	Bartonella apis	GCA_002007565.1	AQT46859.1	DNA adenine methylase CcrM	CP015625.1	822737	823870	+	BBC0122_007300	822736	28.2998	CcrM
Rhizobiales	Bartonella apis	GCA_002007565.1	AQT46902.1	two-component system%2C cell cycle sensor histidine kinase PleC	CP015625.1	876330	878654	-	BBC0122_007740	876329	30.1433	DivL
Rhizobiales	Bartonella apis	GCA_002007565.1	AQT47783.1	histidine phosphotransferase ChpT	CP015625.1	1962150	1962794	-	BBC0122_016810	1962149	67.4925	ChpT
Rhizobiales	Bartonella apis	GCA_002007565.1	AQT48530.1	chromosome segregation DNA-binding protein	CP015625.1	2898107	2898982	-	BBC0122_024640	2898106	99.6868	ParB
Rhizobiales	Bartonella apis	GCA_002007565.1	AQT46890.1	two component transcriptional regulator%2C winged helix family	CP015625.1	860256	860909	+	BBC0122_007620	860255	29.5904	CtrA
Rhizobiales	Bartonella apis	GCA_002007565.1	AQT48531.1	chromosome segregation ATPase	CP015625.1	2899018	2899812	-	BBC0122_024650	2899017	99.7181	ParA
Rhizobiales	Bartonella apis	GCA_002007565.1	AQT46410.1	chromosomal replication initiator protein DnaA	CP015625.1	310424	311923	+	BBC0122_002720	310423	10.6777	DnaA
Rhizobiales	Bartonella apis	GCA_002007565.1	AQT47070.1	ATP-dependent Clp protease ATP-binding subunit ClpX	CP015625.1	1086775	1088049	+	BBC0122_009440	1086774	37.382	ClpX
Rhizobiales	Bartonella apis	GCA_002007565.1	AQT46276.1	PAS domain S-box-containing protein	CP015625.1	148624	151107	+	BBC0122_001360	148623	5.11222	DivL
Rhizobiales	Bartonella apis	GCA_002007565.1	AQT47358.1	cell cycle control histidine kinase CckA	CP015625.1	1444946	1447510	-	BBC0122_012470	1444945	49.7021	CckA
Rhizobiales	Bartonella bacilliformis	GCA_001559035.2	AMG85253.1	chromosome partitioning protein ParB	CP014012.2	59009	59920	+	AL467_00235	6700	0.464179	ParB
Rhizobiales	Bartonella bacilliformis	GCA_001559035.2	AMG85593.1	PAS domain S-box protein	CP014012.2	484380	486701	-	AL467_02135	432071	29.934	DivL
Rhizobiales	Bartonella bacilliformis	GCA_001559035.2	AMG85584.1	DNA-binding response regulator	CP014012.2	474054	474719	+	AL467_02090	421745	29.2187	CtrA
Rhizobiales	Bartonella bacilliformis	GCA_001559035.2	AMG85929.1	hybrid sensor histidine kinase/response regulator	CP014012.2	915359	917896	-	AL467_04120	863050	59.7924	CckA
Rhizobiales	Bartonella bacilliformis	GCA_001559035.2	AMG85572.1	site-specific DNA-methyltransferase	CP014012.2	459541	460677	+	AL467_02025	407232	28.2132	CcrM
Rhizobiales	Bartonella bacilliformis	GCA_001559035.2	AMG86059.1	histidine phosphotransferase	CP014012.2	1098782	1099420	-	AL467_04840	1046473	72.5001	ChpT
Rhizobiales	Bartonella bacilliformis	GCA_001559035.2	AMG86373.1	chromosomal replication initiator protein DnaA	CP014012.2	1366302	1367876	-	AL467_06025	1313993	91.0339	DnaA
Rhizobiales	Bartonella bacilliformis	GCA_001559035.2	AMG85220.1	PAS domain-containing protein	CP014012.2	17112	19586	+	AL467_00065	1408213	97.5615	DivL
Rhizobiales	Bartonella bacilliformis	GCA_001559035.2	AMG86259.1	GcrA cell cycle regulator	CP014012.2	1375225	1375764	-	AL467_06065	1322916	91.6521	GcrA
Rhizobiales	Bartonella bacilliformis	GCA_001559035.2	AMG85252.1	ParA family protein	CP014012.2	58160	58957	+	AL467_00230	5851	0.40536	ParA
Rhizobiales	Bartonella bacilliformis	GCA_001559035.2	AMG85687.1	ATP-dependent Clp protease ATP-binding subunit ClpX	CP014012.2	602278	603552	+	AL467_02640	549969	38.1021	ClpX
Rhizobiales	Bartonella elizabethae	GCA_900638615.1	VEJ42186.1	Sensor protein divL	LR134527.1	1906282	1908747	-	NCTC12898_01648	33863	1.6776	DivL
Rhizobiales	Bartonella elizabethae	GCA_900638615.1	VEJ42154.1	Sporulation initiation inhibitor protein soj	LR134527.1	1866397	1867194	-	NCTC12898_01616	2012516	99.7017	ParA
Rhizobiales	Bartonella elizabethae	GCA_900638615.1	VEJ41011.1	ATP-dependent Clp protease ATP-binding subunit ClpX	LR134527.1	638043	639317	+	NCTC12898_00525	784162	38.848	ClpX
Rhizobiales	Bartonella elizabethae	GCA_900638615.1	VEJ41637.1	Uncharacterized protein conserved in bacteria	LR134527.1	1223837	1224475	-	NCTC12898_01076	1369956	67.8687	ChpT
Rhizobiales	Bartonella elizabethae	GCA_900638615.1	VEJ41201.1	Blue-light-activated protein	LR134527.1	733779	736322	+	NCTC12898_00617	879898	43.5909	CckA
Rhizobiales	Bartonella elizabethae	GCA_900638615.1	VEJ42153.1	Chromosome-partitioning protein parB	LR134527.1	1865462	1866358	-	NCTC12898_01615	2011581	99.6553	ParB
Rhizobiales	Bartonella elizabethae	GCA_900638615.1	VEJ40110.1	Modification methylase DpnIIB	LR134527.1	394534	395670	+	NCTC12898_00304	540653	26.7844	CcrM
Rhizobiales	Bartonella elizabethae	GCA_900638615.1	VEJ40534.1	Non-motile and phage-resistance protein	LR134527.1	509804	512125	-	NCTC12898_00419	655923	32.495	DivL
Rhizobiales	Bartonella elizabethae	GCA_900638615.1	VEJ39465.1	Chromosomal replication initiator protein DnaA	LR134527.1	1	1485	+	NCTC12898_00001	146120	7.2389	DnaA
Rhizobiales	Bartonella elizabethae	GCA_900638615.1	VEJ40312.1	Transcriptional regulatory protein phoP	LR134527.1	445073	445741	+	NCTC12898_00371	591192	29.2881	CtrA
Rhizobiales	Bartonella elizabethae	GCA_900638615.1	VEJ42258.1	Uncharacterized protein conserved in bacteria	LR134527.1	2006440	2006970	-	NCTC12898_01721	134021	6.63951	GcrA
Rhizobiales	Bartonella henselae str. Houston-1	GCA_000046705.1	CAF28426.1	Chromosome partitioning protein%2C parB	BX897699.1	1923480	1924385	-	BH16650	1924124	99.6415	ParB
Rhizobiales	Bartonella henselae str. Houston-1	GCA_000046705.1	CAF27291.1	Two-component sensor histidine kinase	BX897699.1	559465	561786	-	BH04830	560109	29.0055	DivL
Rhizobiales	Bartonella henselae str. Houston-1	GCA_000046705.1	CAF27279.1	Two-component system regulatory protein	BX897699.1	543628	544296	+	BH04710	544272	28.1853	CtrA
Rhizobiales	Bartonella henselae str. Houston-1	GCA_000046705.1	CAF27262.1	Adenine DNA methyltransferase protein	BX897699.1	521989	523125	+	BH04530	522633	27.0647	CcrM
Rhizobiales	Bartonella henselae str. Houston-1	GCA_000046705.1	CAF28427.1	Chromosome partitioning protein parA	BX897699.1	1924432	1925229	-	BH16660	1925076	99.6908	ParA
Rhizobiales	Bartonella henselae str. Houston-1	GCA_000046705.1	CAF26846.1	Sensor histidine kinase protein	BX897699.1	37929	40394	-	BH00300	38573	1.99752	DivL
Rhizobiales	Bartonella henselae str. Houston-1	GCA_000046705.1	CAF27989.1	hypothetical protein	BX897699.1	1343316	1343954	-	BH12060	1343960	69.5975	ChpT
Rhizobiales	Bartonella henselae str. Houston-1	GCA_000046705.1	CAF26925.1	hypothetical protein	BX897699.1	150217	150750	+	BH01100	150861	7.81239	GcrA
Rhizobiales	Bartonella henselae str. Houston-1	GCA_000046705.1	CAF27757.1	Sensor histidine kinase	BX897699.1	1057037	1059514	-	BH09640	1057681	54.7724	CckA
Rhizobiales	Bartonella henselae str. Houston-1	GCA_000046705.1	CAF26933.1	Chromosomal replication initiator protein D	BX897699.1	158771	160342	+	BH01180	159415	8.25537	DnaA
Rhizobiales	Bartonella henselae str. Houston-1	GCA_000046705.1	CAF27397.1	ATP-dependent clp protease ATP-binding subunit clpX	BX897699.1	690960	692234	+	BH05890	691604	35.815	ClpX
Rhizobiales	Bartonella quintana str. Toulouse	GCA_000046685.1	CAF26811.1	Chromosome partitioning protein%2C parb	BX897700.1	1573803	1574708	-	BQ13530	1411970	89.287	ParB
Rhizobiales	Bartonella quintana str. Toulouse	GCA_000046685.1	CAF26812.1	Chromosome partitioning protein para	BX897700.1	1574757	1575554	-	BQ13540	1412924	89.3473	ParA
Rhizobiales	Bartonella quintana str. Toulouse	GCA_000046685.1	CAF26424.1	hypothetical protein	BX897700.1	1125200	1125838	-	BQ09470	963367	60.9192	ChpT
Rhizobiales	Bartonella quintana str. Toulouse	GCA_000046685.1	CAF25535.1	Sensor histidine kinase protein	BX897700.1	35491	37935	-	BQ00280	1455042	92.0107	DivL
Rhizobiales	Bartonella quintana str. Toulouse	GCA_000046685.1	CAF25890.1	Two-component system regulatory protein	BX897700.1	482132	482800	+	BQ03910	320299	20.2543	CtrA
Rhizobiales	Bartonella quintana str. Toulouse	GCA_000046685.1	CAF25872.1	Adenine DNA methyltransferase protein	BX897700.1	458386	459522	+	BQ03720	296553	18.7528	CcrM
Rhizobiales	Bartonella quintana str. Toulouse	GCA_000046685.1	CAF25617.1	Chromosomal replication initiator protein D	BX897700.1	146196	147767	+	BQ01110	1565747	99.0112	DnaA
Rhizobiales	Bartonella quintana str. Toulouse	GCA_000046685.1	CAF26224.1	Sensor histidine kinase	BX897700.1	870492	872981	-	BQ07400	708659	44.8126	CckA
Rhizobiales	Bartonella quintana str. Toulouse	GCA_000046685.1	CAF25902.1	Two-component sensor histidine kinase	BX897700.1	498266	500587	-	BQ04030	336433	21.2746	DivL
Rhizobiales	Bartonella quintana str. Toulouse	GCA_000046685.1	CAF26004.1	ATP-dependent clp protease ATP-binding subunit clpX	BX897700.1	613835	615109	+	BQ05050	452002	28.5827	ClpX
Rhizobiales	Bartonella quintana str. Toulouse	GCA_000046685.1	CAF25608.1	hypothetical protein	BX897700.1	137737	138270	+	BQ01020	1557288	98.4763	GcrA
Rhizobiales	Bartonella sp. 1-1C	GCA_002810325.1	ATO57705.1	two-component system%2C OmpR family%2C response regulator	CP019489.1	1057807	1058475	-	B11Cv2_009450	1199255	74.9244	CtrA
Rhizobiales	Bartonella sp. 1-1C	GCA_002810325.1	ATO58141.1	Global cell cycle regulator GcrA	CP019489.1	1593544	1594077	+	B11Cv2_014070	134371	8.39493	GcrA
Rhizobiales	Bartonella sp. 1-1C	GCA_002810325.1	ATO57781.1	histidine phosphotransferase ChpT	CP019489.1	1151971	1152609	-	B11Cv2_010230	1293419	80.8073	ChpT
Rhizobiales	Bartonella sp. 1-1C	GCA_002810325.1	ATO58066.1	PAS domain-containing protein	CP019489.1	1491672	1494134	-	B11Cv2_013300	32499	2.0304	DivL
Rhizobiales	Bartonella sp. 1-1C	GCA_002810325.1	ATO57501.1	ATP-dependent Clp protease ATP-binding subunit ClpX	CP019489.1	818080	819354	-	B11Cv2_007390	959528	59.9472	ClpX
Rhizobiales	Bartonella sp. 1-1C	GCA_002810325.1	ATO58036.1	chromosome segregation DNA-binding protein	CP019489.1	1451579	1452487	-	B11Cv2_013000	1593027	99.5256	ParB
Rhizobiales	Bartonella sp. 1-1C	GCA_002810325.1	ATO58037.1	chromosome segregation ATPase	CP019489.1	1452531	1453328	-	B11Cv2_013010	1593979	99.585	ParA
Rhizobiales	Bartonella sp. 1-1C	GCA_002810325.1	ATO57722.1	DNA adenine methylase CcrM	CP019489.1	1080161	1081297	-	B11Cv2_009630	1221609	76.3209	CcrM
Rhizobiales	Bartonella sp. 1-1C	GCA_002810325.1	ATO57421.1	cell cycle control histidine kinase CckA	CP019489.1	715634	718186	-	B11Cv2_006570	857082	53.5468	CckA
Rhizobiales	Bartonella sp. 1-1C	GCA_002810325.1	ATO57693.1	two-component system%2C cell cycle sensor histidine kinase PleC	CP019489.1	1041217	1043526	+	B11Cv2_009330	1182665	73.8879	DivL
Rhizobiales	Bartonella sp. 1-1C	GCA_002810325.1	ATO56790.1	chromosomal replication initiator protein DnaA	CP019489.1	671	2245	+	B11Cv2_000010	142119	8.87899	DnaA
Rhizobiales	Bartonella sp. A1379B	GCA_002022485.1	AQX19060.1	PAS domain-containing protein	CP019780.1	1432915	1435377	-	BA1379B_012610	32479	2.10632	DivL
Rhizobiales	Bartonella sp. A1379B	GCA_002022485.1	AQX18679.1	two-component system%2C cell cycle sensor histidine kinase PleC	CP019780.1	981081	983390	+	BA1379B_008560	1122621	72.8041	DivL
Rhizobiales	Bartonella sp. A1379B	GCA_002022485.1	AQX19135.1	Global cell cycle regulator GcrA	CP019780.1	1534828	1535361	+	BA1379B_013380	134392	8.71557	GcrA
Rhizobiales	Bartonella sp. A1379B	GCA_002022485.1	AQX18691.1	two-component system%2C OmpR family%2C response regulator	CP019780.1	997677	998345	-	BA1379B_008680	1139217	73.8803	CtrA
Rhizobiales	Bartonella sp. A1379B	GCA_002022485.1	AQX19031.1	chromosome segregation ATPase	CP019780.1	1394394	1395191	-	BA1379B_012320	1535934	99.6082	ParA
Rhizobiales	Bartonella sp. A1379B	GCA_002022485.1	AQX18490.1	ATP-dependent Clp protease ATP-binding subunit ClpX	CP019780.1	757473	758747	-	BA1379B_006650	899013	58.3027	ClpX
Rhizobiales	Bartonella sp. A1379B	GCA_002022485.1	AQX18707.1	DNA adenine methylase CcrM	CP019780.1	1020040	1021176	-	BA1379B_008850	1161580	75.3306	CcrM
Rhizobiales	Bartonella sp. A1379B	GCA_002022485.1	AQX18764.1	histidine phosphotransferase ChpT	CP019780.1	1091230	1091868	-	BA1379B_009430	1232770	79.9474	ChpT
Rhizobiales	Bartonella sp. A1379B	GCA_002022485.1	AQX17853.1	chromosomal replication initiator protein DnaA	CP019780.1	620	2194	+	BA1379B_000010	142160	9.21934	DnaA
Rhizobiales	Bartonella sp. A1379B	GCA_002022485.1	AQX19030.1	chromosome segregation DNA-binding protein	CP019780.1	1393442	1394350	-	BA1379B_012310	1534982	99.5464	ParB
Rhizobiales	Bartonella sp. A1379B	GCA_002022485.1	AQX18408.1	cell cycle control histidine kinase CckA	CP019780.1	655129	657678	-	BA1379B_005810	796669	51.6655	CckA
Rhizobiales	Bartonella sp. JB15	GCA_002022605.1	AQX27668.1	two-component system%2C cell cycle sensor histidine kinase PleC	CP019787.1	283308	285617	-	BJB15x_002550	421670	28.2239	DivL
Rhizobiales	Bartonella sp. JB15	GCA_002022605.1	AQX28590.1	chromosome segregation DNA-binding protein	CP019787.1	1348655	1349563	-	BJB15x_012200	1487017	99.5314	ParB
Rhizobiales	Bartonella sp. JB15	GCA_002022605.1	AQX27638.1	DNA adenine methylase CcrM	CP019787.1	246228	247364	+	BJB15x_002240	384590	25.742	CcrM
Rhizobiales	Bartonella sp. JB15	GCA_002022605.1	AQX27657.1	two-component system%2C OmpR family%2C response regulator	CP019787.1	269119	269787	+	BJB15x_002440	407481	27.2742	CtrA
Rhizobiales	Bartonella sp. JB15	GCA_002022605.1	AQX28624.1	PAS domain-containing protein	CP019787.1	1387238	1389724	-	BJB15x_012540	31582	2.1139	DivL
Rhizobiales	Bartonella sp. JB15	GCA_002022605.1	AQX28591.1	chromosome segregation ATPase	CP019787.1	1349612	1350409	-	BJB15x_012210	1487974	99.5955	ParA
Rhizobiales	Bartonella sp. JB15	GCA_002022605.1	AQX27576.1	histidine phosphotransferase ChpT	CP019787.1	171107	171745	+	BJB15x_001610	309469	20.7139	ChpT
Rhizobiales	Bartonella sp. JB15	GCA_002022605.1	AQX27861.1	ATP-dependent Clp protease ATP-binding subunit ClpX	CP019787.1	510578	511852	+	BJB15x_004500	648940	43.4359	ClpX
Rhizobiales	Bartonella sp. JB15	GCA_002022605.1	AQX27423.1	chromosomal replication initiator protein DnaA	CP019787.1	601	2175	+	BJB15x_000010	138963	9.30129	DnaA
Rhizobiales	Bartonella sp. JB15	GCA_002022605.1	AQX27959.1	cell cycle control histidine kinase CckA	CP019787.1	618695	621244	+	BJB15x_005500	757057	50.6725	CckA
Rhizobiales	Bartonella sp. JB15	GCA_002022605.1	AQX28697.1	Global cell cycle regulator GcrA	CP019787.1	1486642	1487175	+	BJB15x_013290	130986	8.76736	GcrA
Rhizobiales	Bartonella sp. JB63	GCA_002022665.1	AQX29849.1	chromosome segregation DNA-binding protein	CP019788.1	1348323	1349231	-	BJB63x_011980	1486692	99.5313	ParB
Rhizobiales	Bartonella sp. JB63	GCA_002022665.1	AQX28855.1	histidine phosphotransferase ChpT	CP019788.1	171108	171746	+	BJB63x_001580	309477	20.7189	ChpT
Rhizobiales	Bartonella sp. JB63	GCA_002022665.1	AQX29235.1	cell cycle control histidine kinase CckA	CP019788.1	618730	621279	+	BJB63x_005440	757099	50.6864	CckA
Rhizobiales	Bartonella sp. JB63	GCA_002022665.1	AQX28949.1	two-component system%2C cell cycle sensor histidine kinase PleC	CP019788.1	283300	285609	-	BJB63x_002540	421669	28.23	DivL
Rhizobiales	Bartonella sp. JB63	GCA_002022665.1	AQX29142.1	ATP-dependent Clp protease ATP-binding subunit ClpX	CP019788.1	510571	511845	+	BJB63x_004490	648940	43.4453	ClpX
Rhizobiales	Bartonella sp. JB63	GCA_002022665.1	AQX29880.1	PAS domain-containing protein	CP019788.1	1386909	1389395	-	BJB63x_012290	31585	2.11456	DivL
Rhizobiales	Bartonella sp. JB63	GCA_002022665.1	AQX28938.1	two-component system%2C OmpR family%2C response regulator	CP019788.1	269112	269780	+	BJB63x_002430	407481	27.2801	CtrA
Rhizobiales	Bartonella sp. JB63	GCA_002022665.1	AQX29951.1	Global cell cycle regulator GcrA	CP019788.1	1486317	1486850	+	BJB63x_013020	130993	8.76974	GcrA
Rhizobiales	Bartonella sp. JB63	GCA_002022665.1	AQX28705.1	chromosomal replication initiator protein DnaA	CP019788.1	601	2175	+	BJB63x_000010	138970	9.30379	DnaA
Rhizobiales	Bartonella sp. JB63	GCA_002022665.1	AQX29850.1	chromosome segregation ATPase	CP019788.1	1349280	1350077	-	BJB63x_011990	1487649	99.5954	ParA
Rhizobiales	Bartonella sp. JB63	GCA_002022665.1	AQX28919.1	DNA adenine methylase CcrM	CP019788.1	246224	247360	+	BJB63x_002230	384593	25.7478	CcrM
Rhizobiales	Bartonella sp. Raccoon60	GCA_002022585.1	AQX27416.1	Global cell cycle regulator GcrA	CP019786.1	1608608	1609141	+	Bra60_014500	134353	8.31547	GcrA
Rhizobiales	Bartonella sp. Raccoon60	GCA_002022585.1	AQX26975.1	DNA adenine methylase CcrM	CP019786.1	1073775	1074908	-	Bra60_009770	1215220	75.2132	CcrM
Rhizobiales	Bartonella sp. Raccoon60	GCA_002022585.1	AQX27341.1	PAS domain-containing protein	CP019786.1	1506682	1509144	-	Bra60_013730	32427	2.00699	DivL
Rhizobiales	Bartonella sp. Raccoon60	GCA_002022585.1	AQX26958.1	two-component system%2C OmpR family%2C response regulator	CP019786.1	1051378	1052046	-	Bra60_009590	1192823	73.827	CtrA
Rhizobiales	Bartonella sp. Raccoon60	GCA_002022585.1	AQX27032.1	histidine phosphotransferase ChpT	CP019786.1	1144747	1145385	-	Bra60_010350	1286192	79.6059	ChpT
Rhizobiales	Bartonella sp. Raccoon60	GCA_002022585.1	AQX27311.1	chromosome segregation DNA-binding protein	CP019786.1	1467261	1468169	-	Bra60_013430	1608706	99.5671	ParB
Rhizobiales	Bartonella sp. Raccoon60	GCA_002022585.1	AQX26946.1	two-component system%2C cell cycle sensor histidine kinase PleC	CP019786.1	1034776	1037085	+	Bra60_009470	1176221	72.7995	DivL
Rhizobiales	Bartonella sp. Raccoon60	GCA_002022585.1	AQX26753.1	ATP-dependent Clp protease ATP-binding subunit ClpX	CP019786.1	811736	813010	-	Bra60_007520	953181	58.9949	ClpX
Rhizobiales	Bartonella sp. Raccoon60	GCA_002022585.1	AQX27312.1	chromosome segregation ATPase	CP019786.1	1468213	1469010	-	Bra60_013440	1609658	99.626	ParA
Rhizobiales	Bartonella sp. Raccoon60	GCA_002022585.1	AQX26668.1	cell cycle control histidine kinase CckA	CP019786.1	709687	712086	-	Bra60_006650	851132	52.6788	CckA
Rhizobiales	Bartonella sp. Raccoon60	GCA_002022585.1	AQX26028.1	chromosomal replication initiator protein DnaA	CP019786.1	671	2245	+	Bra60_000010	142116	8.79594	DnaA
Rhizobiales	Bartonella sp. WD16.2	GCA_002022505.1	AQX19401.1	DNA adenine methylase CcrM	CP019781.1	358765	359901	+	BWD162_002670	497829	28.2377	CcrM
Rhizobiales	Bartonella sp. WD16.2	GCA_002022505.1	AQX20592.1	PAS domain-containing protein	CP019781.1	1658626	1661019	-	BWD162_015050	34694	1.9679	DivL
Rhizobiales	Bartonella sp. WD16.2	GCA_002022505.1	AQX19413.1	two-component system%2C OmpR family%2C response regulator	CP019781.1	375568	376236	+	BWD162_002800	514632	29.1908	CtrA
Rhizobiales	Bartonella sp. WD16.2	GCA_002022505.1	AQX19529.1	ATP-dependent Clp protease ATP-binding subunit ClpX	CP019781.1	506919	508193	+	BWD162_003970	645983	36.6412	ClpX
Rhizobiales	Bartonella sp. WD16.2	GCA_002022505.1	AQX20555.1	chromosome segregation DNA-binding protein	CP019781.1	1617003	1617911	-	BWD162_014680	1756067	99.607	ParB
Rhizobiales	Bartonella sp. WD16.2	GCA_002022505.1	AQX20095.1	histidine phosphotransferase ChpT	CP019781.1	1104484	1105122	-	BWD162_009860	1243548	70.5361	ChpT
Rhizobiales	Bartonella sp. WD16.2	GCA_002022505.1	AQX19424.1	two-component system%2C cell cycle sensor histidine kinase PleC	CP019781.1	389651	391969	-	BWD162_002910	528715	29.9896	DivL
Rhizobiales	Bartonella sp. WD16.2	GCA_002022505.1	AQX19142.1	chromosomal replication initiator protein DnaA	CP019781.1	637	2211	+	BWD162_000010	139701	7.92407	DnaA
Rhizobiales	Bartonella sp. WD16.2	GCA_002022505.1	AQX20660.1	Global cell cycle regulator GcrA	CP019781.1	1755144	1755677	+	BWD162_015750	131212	7.44256	GcrA
Rhizobiales	Bartonella sp. WD16.2	GCA_002022505.1	AQX19847.1	cell cycle control histidine kinase CckA	CP019781.1	831895	834438	-	BWD162_007300	970959	55.0744	CckA
Rhizobiales	Bartonella vinsonii subsp. berkhoffii str. Winnie	GCA_000341385.1	AGF75186.1	sensor histidine kinase protein	CP003124.1	32579	35044	-	BVwin_00280	33203	1.84185	DivL
Rhizobiales	Bartonella vinsonii subsp. berkhoffii str. Winnie	GCA_000341385.1	AGF76588.1	chromosome partitioning protein	CP003124.1	1796045	1796842	-	BVwin_15220	1796669	99.6655	ParA
Rhizobiales	Bartonella vinsonii subsp. berkhoffii str. Winnie	GCA_000341385.1	AGF75495.1	adenine DNA methyltransferase protein	CP003124.1	450657	451793	+	BVwin_03520	451281	25.0336	CcrM
Rhizobiales	Bartonella vinsonii subsp. berkhoffii str. Winnie	GCA_000341385.1	AGF75263.1	chromosomal replication initiator protein	CP003124.1	139253	140824	+	BVwin_01060	139877	7.75931	DnaA
Rhizobiales	Bartonella vinsonii subsp. berkhoffii str. Winnie	GCA_000341385.1	AGF75551.1	two-component system regulatory protein	CP003124.1	523028	523696	+	BVwin_04090	523652	29.0482	CtrA
Rhizobiales	Bartonella vinsonii subsp. berkhoffii str. Winnie	GCA_000341385.1	AGF75255.1	GcrA cell cycle regulator	CP003124.1	131233	131760	+	BVwin_00980	131857	7.31442	GcrA
Rhizobiales	Bartonella vinsonii subsp. berkhoffii str. Winnie	GCA_000341385.1	AGF76136.1	hypothetical protein	CP003124.1	1241204	1241842	-	BVwin_10360	1241828	68.8872	ChpT
Rhizobiales	Bartonella vinsonii subsp. berkhoffii str. Winnie	GCA_000341385.1	AGF75662.1	ATP-dependent protease ATP-binding subunit ClpX	CP003124.1	662362	663636	+	BVwin_05270	662986	36.7774	ClpX
Rhizobiales	Bartonella vinsonii subsp. berkhoffii str. Winnie	GCA_000341385.1	AGF75951.1	sensor histidine kinase	CP003124.1	1003784	1006327	-	BVwin_08460	1004408	55.7169	CckA
Rhizobiales	Bartonella vinsonii subsp. berkhoffii str. Winnie	GCA_000341385.1	AGF76587.1	chromosome partitioning protein%2C ParB family	CP003124.1	1795094	1795999	-	BVwin_15210	1795718	99.6127	ParB
Rhizobiales	Bartonella vinsonii subsp. berkhoffii str. Winnie	GCA_000341385.1	AGF75562.1	two-component sensor histidine kinase	CP003124.1	538651	540972	-	BVwin_04210	539275	29.9149	DivL
Rhizobiales	Beijerinckia indica subsp. indica ATCC 9039	GCA_000019845.1	ACB94662.1	conserved hypothetical protein	CP001016.1	1168461	1169129	-	Bind_1019	1289162	30.914	ChpT
Rhizobiales	Beijerinckia indica subsp. indica ATCC 9039	GCA_000019845.1	ACB97219.1	GcrA cell cycle regulator	CP001016.1	4158679	4159248	+	Bind_3667	109227	2.61926	GcrA
Rhizobiales	Beijerinckia indica subsp. indica ATCC 9039	GCA_000019845.1	ACB95803.1	ATP-dependent Clp protease%2C ATP-binding subunit ClpX	CP001016.1	2494641	2495906	-	Bind_2183	2615342	62.7157	ClpX
Rhizobiales	Beijerinckia indica subsp. indica ATCC 9039	GCA_000019845.1	ACB93662.1	chromosomal replication initiator protein DnaA	CP001016.1	1509	3041	+	Bind_0003	122210	2.93059	DnaA
Rhizobiales	Beijerinckia indica subsp. indica ATCC 9039	GCA_000019845.1	ACB95655.1	multi-sensor signal transduction histidine kinase	CP001016.1	2324637	2327030	-	Bind_2033	2445338	58.639	DivL
Rhizobiales	Beijerinckia indica subsp. indica ATCC 9039	GCA_000019845.1	ACB95846.1	two component transcriptional regulator%2C winged helix family	CP001016.1	2554272	2554979	+	Bind_2228	2674973	64.1457	CtrA
Rhizobiales	Beijerinckia indica subsp. indica ATCC 9039	GCA_000019845.1	ACB95606.1	multi-sensor hybrid histidine kinase	CP001016.1	2264942	2267485	-	Bind_1983	2385643	57.2076	CckA
Rhizobiales	Beijerinckia indica subsp. indica ATCC 9039	GCA_000019845.1	ACB94400.1	DNA methylase N-4/N-6 domain protein	CP001016.1	840376	841563	-	Bind_0750	961077	23.0466	CcrM
Rhizobiales	Bosea sp. Tri-49	GCA_003952665.1	AZO79867.1	chromosome partitioning protein ParB	CP017946.1	4464958	4465842	+	BLM15_21410	10278	0.171312	ParB
Rhizobiales	Bosea sp. Tri-49	GCA_003952665.1	AZO79710.1	GcrA cell cycle regulator	CP017946.1	4278037	4278588	+	BLM15_20495	5822938	97.0557	GcrA
Rhizobiales	Bosea sp. Tri-49	GCA_003952665.1	AZO77533.1	ATP-dependent protease ATP-binding subunit ClpX	CP017946.1	1601828	1603096	-	BLM15_07825	3146729	52.4491	ClpX
Rhizobiales	Bosea sp. Tri-49	GCA_003952665.1	AZO78734.1	modification methylase	CP017946.1	3017820	3018938	+	BLM15_14700	4562721	76.0507	CcrM
Rhizobiales	Bosea sp. Tri-49	GCA_003952665.1	AZO79866.1	chromosome partitioning protein ParA	CP017946.1	4464099	4464926	+	BLM15_21405	9419	0.156994	ParA
Rhizobiales	Bosea sp. Tri-49	GCA_003952665.1	AZO78322.1	PAS domain-containing sensor histidine kinase	CP017946.1	2532583	2534883	+	BLM15_12370	4077484	67.9628	DivL
Rhizobiales	Bosea sp. Tri-49	GCA_003952665.1	AZO76595.1	hybrid sensor histidine kinase/response regulator	CP017946.1	502417	504921	-	BLM15_02475	2047318	34.1243	CckA
Rhizobiales	Bosea sp. Tri-49	GCA_003952665.1	AZO76186.1	histidine phosphotransferase	CP017946.1	31857	32495	-	BLM15_00150	1576758	26.2811	ChpT
Rhizobiales	Bosea sp. Tri-49	GCA_003952665.1	AZO79781.1	two-component sensor histidine kinase	CP017946.1	4362988	4365462	-	BLM15_20900	5907889	98.4717	DivL
Rhizobiales	Bosea sp. Tri-49	GCA_003952665.1	AZO81600.1	chromosomal replication initiation protein DnaA	CP017946.1	4350599	4352044	+	BLM15_20840	5895500	98.2652	DnaA
Rhizobiales	Bosea sp. Tri-49	GCA_003952665.1	AZO78332.1	DNA-binding response regulator	CP017946.1	2549634	2550296	-	BLM15_12430	4094535	68.247	CtrA
Rhizobiales	Bradyrhizobium cosmicum	GCA_000284275.1	BAL78667.1	adenine DNA methyltransferase	AP012279.1	5640809	5641843	+	S23_54750	5642053	78.0168	CcrM
Rhizobiales	Bradyrhizobium cosmicum	GCA_000284275.1	BAL78075.1	putative two-component transcriptional regulatory protein	AP012279.1	4992241	4992915	-	S23_48810	4993485	69.0486	CtrA
Rhizobiales	Bradyrhizobium cosmicum	GCA_000284275.1	BAL79023.1	hypothetical protein	AP012279.1	6034141	6034794	-	S23_58320	6035385	83.4557	ChpT
Rhizobiales	Bradyrhizobium cosmicum	GCA_000284275.1	BAL73433.1	chromosome partitioning protein A	AP012279.1	215099	215953	+	S23_02070	216343	2.99153	ParA
Rhizobiales	Bradyrhizobium cosmicum	GCA_000284275.1	BAL73304.1	two-component hybrid sensor and regulator	AP012279.1	86827	89331	+	S23_00760	88071	1.21782	DivL
Rhizobiales	Bradyrhizobium cosmicum	GCA_000284275.1	BAL73229.1	chromosomal replication initiator protein DnaA	AP012279.1	1	1413	+	S23_00010	1245	0.0172155	DnaA
Rhizobiales	Bradyrhizobium cosmicum	GCA_000284275.1	BAL79898.1	hypothetical protein	AP012279.1	6969198	6969710	+	S23_67220	6970442	96.3854	GcrA
Rhizobiales	Bradyrhizobium cosmicum	GCA_000284275.1	BAL78056.1	two-component sensor histidine kinase	AP012279.1	4966595	4968871	+	S23_48620	4967839	68.694	DivL
Rhizobiales	Bradyrhizobium cosmicum	GCA_000284275.1	BAL76444.1	ATP-dependent Clp protease ATP-binding subunit ClpX	AP012279.1	3322057	3323328	+	S23_32410	3323301	45.9537	ClpX
Rhizobiales	Bradyrhizobium cosmicum	GCA_000284275.1	BAL73434.1	chromosome partitioning protein B	AP012279.1	216097	216984	+	S23_02080	217341	3.00533	ParB
Rhizobiales	Bradyrhizobium cosmicum	GCA_000284275.1	BAL75648.1	two-component hybrid sensor and regulator	AP012279.1	2570200	2572782	+	S23_24350	2571444	35.5573	CckA
Rhizobiales	Bradyrhizobium diazoefficiens	GCA_001549695.1	BAR56860.1	two-component hybrid sensor and regulator	AP014685.1	3644139	3646643	+	NK6_3684	85191	0.871072	DivL
Rhizobiales	Bradyrhizobium diazoefficiens	GCA_001549695.1	BAR56997.1	chromosome partitioning protein B	AP014685.1	3774111	3775019	+	NK6_3823	215163	2.20003	ParB
Rhizobiales	Bradyrhizobium diazoefficiens	GCA_001549695.1	BAR59528.1	adenine DNA methyltransferase	AP014685.1	6248396	6249430	-	NK6_6375	2689448	27.4994	CcrM
Rhizobiales	Bradyrhizobium diazoefficiens	GCA_001549695.1	BAR56478.1	hypothetical protein	AP014685.1	3254722	3255231	+	NK6_3301	9475797	96.8893	GcrA
Rhizobiales	Bradyrhizobium diazoefficiens	GCA_001549695.1	BAR60323.1	two-component response regulator	AP014685.1	7085148	7085822	+	NK6_7172	3526200	36.0551	CtrA
Rhizobiales	Bradyrhizobium diazoefficiens	GCA_001549695.1	BAR53783.1	two-component hybrid sensor and regulator	AP014685.1	540331	542916	-	NK6_598	6761406	69.1349	CckA
Rhizobiales	Bradyrhizobium diazoefficiens	GCA_001549695.1	BAR56778.1	chromosomal replication initiation protein	AP014685.1	3560215	3561627	+	NK6_3602	1267	0.012955	DnaA
Rhizobiales	Bradyrhizobium diazoefficiens	GCA_001549695.1	BAR60344.1	two-component sensor histidine kinase	AP014685.1	7109184	7111460	-	NK6_7193	3550236	36.3009	DivL
Rhizobiales	Bradyrhizobium diazoefficiens	GCA_001549695.1	BAR59176.1	hypothetical protein	AP014685.1	5902474	5903085	+	NK6_6022	2343526	23.9624	ChpT
Rhizobiales	Bradyrhizobium diazoefficiens	GCA_001549695.1	BAR56996.1	chromosome partitioning protein A	AP014685.1	3773140	3773994	+	NK6_3822	214192	2.1901	ParA
Rhizobiales	Bradyrhizobium diazoefficiens	GCA_001549695.1	BAR62804.1	ATP-dependent protease ATP-binding subunit ClpX	AP014685.1	9433968	9435239	-	NK6_9667	5875020	60.0716	ClpX
Rhizobiales	Bradyrhizobium japonicum	GCA_000807315.1	AJA65016.1	modification methylase	CP010313.1	7569931	7571061	+	RN69_35470	7502175	81.3314	CcrM
Rhizobiales	Bradyrhizobium japonicum	GCA_000807315.1	AJA64440.1	histidine kinase	CP010313.1	6804693	6807023	+	RN69_32120	6736937	73.0354	DivL
Rhizobiales	Bradyrhizobium japonicum	GCA_000807315.1	AJA66387.1	GcrA cell cycle regulator	CP010313.1	1202252	1202764	-	RN69_05505	1134496	12.2991	GcrA
Rhizobiales	Bradyrhizobium japonicum	GCA_000807315.1	AJA67089.1	histidine phosphotransferase	CP010313.1	7946770	7947423	-	RN69_37175	7879014	85.4167	ChpT
Rhizobiales	Bradyrhizobium japonicum	GCA_000807315.1	AJA59484.1	chromosome partitioning protein ParB	CP010313.1	619483	620370	-	RN69_02930	551727	5.98129	ParB
Rhizobiales	Bradyrhizobium japonicum	GCA_000807315.1	AJA59619.1	histidine kinase	CP010313.1	787396	789900	-	RN69_03700	719640	7.80165	DivL
Rhizobiales	Bradyrhizobium japonicum	GCA_000807315.1	AJA62179.1	histidine kinase	CP010313.1	4046410	4048992	+	RN69_18915	3978654	43.1327	CckA
Rhizobiales	Bradyrhizobium japonicum	GCA_000807315.1	AJA64459.1	transcriptional regulator	CP010313.1	6834931	6835605	-	RN69_32230	6767175	73.3632	CtrA
Rhizobiales	Bradyrhizobium japonicum	GCA_000807315.1	AJA62910.1	hypothetical protein	CP010313.1	4865053	4866324	+	RN69_23135	4797297	52.0077	ClpX
Rhizobiales	Bradyrhizobium japonicum	GCA_000807315.1	AJA59692.1	chromosomal replication initiation protein	CP010313.1	881765	883177	-	RN69_04115	814009	8.8247	DnaA
Rhizobiales	Bradyrhizobium japonicum	GCA_000807315.1	AJA59485.1	chromosome partitioning protein ParA	CP010313.1	620507	621391	-	RN69_02935	552751	5.9924	ParA
Rhizobiales	Bradyrhizobium ottawaense	GCA_002278135.2	AWL97966.1	GcrA cell cycle regulator	CP029425.1	1856954	1857466	+	CIT37_08785	8309779	96.5543	GcrA
Rhizobiales	Bradyrhizobium ottawaense	GCA_002278135.2	AWL92727.1	ParB/RepB/Spo0J family partition protein	CP029425.1	2396763	2397671	+	CIT37_11265	243260	2.82652	ParB
Rhizobiales	Bradyrhizobium ottawaense	GCA_002278135.2	AWL91213.1	histidine phosphotransferase	CP029425.1	457860	458570	-	CIT37_02020	6910685	80.2977	ChpT
Rhizobiales	Bradyrhizobium ottawaense	GCA_002278135.2	AWL95809.1	ATP-dependent Clp protease ATP-binding subunit ClpX	CP029425.1	6112152	6113423	+	CIT37_29460	3958649	45.997	ClpX
Rhizobiales	Bradyrhizobium ottawaense	GCA_002278135.2	AWL92586.1	PAS domain-containing protein	CP029425.1	2238898	2241402	+	CIT37_10470	85395	0.992235	DivL
Rhizobiales	Bradyrhizobium ottawaense	GCA_002278135.2	AWL92726.1	ParA family protein	CP029425.1	2395756	2396634	+	CIT37_11260	242253	2.81482	ParA
Rhizobiales	Bradyrhizobium ottawaense	GCA_002278135.2	AWL97252.1	DNA-binding response regulator	CP029425.1	7898892	7899557	-	CIT37_37915	5745389	66.7577	CtrA
Rhizobiales	Bradyrhizobium ottawaense	GCA_002278135.2	AWL97237.1	PAS domain-containing protein	CP029425.1	7873213	7875543	+	CIT37_37820	5719710	66.4594	DivL
Rhizobiales	Bradyrhizobium ottawaense	GCA_002278135.2	AWL92520.1	chromosomal replication initiator protein DnaA	CP029425.1	2154746	2156155	+	CIT37_10095	1243	0.0144429	DnaA
Rhizobiales	Bradyrhizobium ottawaense	GCA_002278135.2	AWL95093.1	hybrid sensor histidine kinase/response regulator	CP029425.1	5315855	5318434	+	CIT37_25265	3162352	36.7445	CckA
Rhizobiales	Bradyrhizobium sp.	GCA_900011245.1	CUT15536.1	ATPdependent Clp protease ATPbinding subunit ClpX	LN901633.1	6739378	6740649	+	BF49_6616	6804822	90.1576	ClpX
Rhizobiales	Bradyrhizobium sp.	GCA_900011245.1	CUT10485.1	DNAbinding response regulator	LN901633.1	1622967	1623638	-	BF49_1565	1688411	22.3699	CtrA
Rhizobiales	Bradyrhizobium sp.	GCA_900011245.1	CUT09137.1	Chromosome plasmid partitioning protein ParB	LN901633.1	221324	222229	+	BF49_0217	286768	3.79941	ParB
Rhizobiales	Bradyrhizobium sp.	GCA_900011245.1	CUT09002.1	FIG056333 sensor	LN901633.1	90303	92807	+	BF49_0082	155747	2.0635	DivL
Rhizobiales	Bradyrhizobium sp.	GCA_900011245.1	CUT09136.1	Chromosome plasmid partitioning protein ParA	LN901633.1	220316	221170	+	BF49_0216	285760	3.78606	ParA
Rhizobiales	Bradyrhizobium sp.	GCA_900011245.1	CUT16242.1	Chromosomal replication initiator protein DnaA	LN901633.1	7483625	7484944	+	BF49_7322	1376	0.0182307	DnaA
Rhizobiales	Bradyrhizobium sp.	GCA_900011245.1	CUT10466.1	Twocomponent sensor histidine kinase PleC	LN901633.1	1597199	1599529	+	BF49_1546	1662643	22.0285	DivL
Rhizobiales	Bradyrhizobium sp.	GCA_900011245.1	CUT11203.1	Modification methylase	LN901633.1	2404126	2405160	+	BF49_2283	2469570	32.7195	CcrM
Rhizobiales	Bradyrhizobium sp.	GCA_900011245.1	CUT14752.1	multisensor hybrid histidine kinase	LN901633.1	6015951	6018533	+	BF49_5832	6081395	80.5729	CckA
Rhizobiales	Bradyrhizobium sp.	GCA_900011245.1	CUT11664.1	Signal transduction histidine kinase	LN901633.1	2898280	2898933	-	BF49_2744	2963724	39.2666	ChpT
Rhizobiales	Bradyrhizobium sp. SK17	GCA_002831585.1	AUC94603.1	GcrA cell cycle regulator	CP025113.1	2192233	2192745	-	CWS35_10250	1079635	13.4902	GcrA
Rhizobiales	Bradyrhizobium sp. SK17	GCA_002831585.1	AUC96106.1	DNA-binding response regulator	CP025113.1	4148689	4149354	+	CWS35_19000	3036091	37.9365	CtrA
Rhizobiales	Bradyrhizobium sp. SK17	GCA_002831585.1	AUC93818.1	two-component sensor histidine kinase	CP025113.1	1199937	1202447	+	CWS35_05535	87339	1.09132	DivL
Rhizobiales	Bradyrhizobium sp. SK17	GCA_002831585.1	AUD00029.1	histidine phosphotransferase	CP025113.1	7574440	7575087	-	CWS35_35185	6461842	80.7418	ChpT
Rhizobiales	Bradyrhizobium sp. SK17	GCA_002831585.1	AUC93931.1	chromosome partitioning protein ParB	CP025113.1	1342516	1343433	+	CWS35_06215	229918	2.87287	ParB
Rhizobiales	Bradyrhizobium sp. SK17	GCA_002831585.1	AUC95317.1	modification methylase	CP025113.1	3110943	3112076	-	CWS35_14495	1998345	24.9697	CcrM
Rhizobiales	Bradyrhizobium sp. SK17	GCA_002831585.1	AUC97361.1	ATP-dependent Clp protease ATP-binding subunit ClpX	CP025113.1	5674382	5675656	-	CWS35_26240	4561784	57.0003	ClpX
Rhizobiales	Bradyrhizobium sp. SK17	GCA_002831585.1	AUC96126.1	PAS domain-containing sensor histidine kinase	CP025113.1	4174093	4176414	-	CWS35_19110	3061495	38.2539	DivL
Rhizobiales	Bradyrhizobium sp. SK17	GCA_002831585.1	AUC93930.1	ParA family protein	CP025113.1	1341537	1342388	+	CWS35_06210	228939	2.86063	ParA
Rhizobiales	Bradyrhizobium sp. SK17	GCA_002831585.1	AUC93755.1	chromosomal replication initiator protein DnaA	CP025113.1	1113840	1115270	+	CWS35_05150	1242	0.015519	DnaA
Rhizobiales	Bradyrhizobium sp. SK17	GCA_002831585.1	AUC98186.1	hybrid sensor histidine kinase/response regulator	CP025113.1	6684540	6687134	-	CWS35_31030	5571942	69.6224	CckA
Rhizobiales	Bradyrhizobium vignae	GCA_900324035.1	SPP94347.1	Two-component hybrid sensor and regulator	LS398110.1	3092624	3095209	+	BRAD3257_3311	3093794	37.9326	CckA
Rhizobiales	Bradyrhizobium vignae	GCA_900324035.1	SPP95100.1	ATP-dependent Clp protease ATP-binding subunit	LS398110.1	3776596	3777867	+	BRAD3257_4090	3777766	46.3187	ClpX
Rhizobiales	Bradyrhizobium vignae	GCA_900324035.1	SPP91251.1	Two-component hybrid sensor and regulator	LS398110.1	71621	74125	+	BRAD3257_0074	72791	0.892482	DivL
Rhizobiales	Bradyrhizobium vignae	GCA_900324035.1	SPP91385.1	Chromosome partitioning protein ParA	LS398110.1	203363	204229	+	BRAD3257_0212	204533	2.50775	ParA
Rhizobiales	Bradyrhizobium vignae	GCA_900324035.1	SPP96529.1	DNA-binding response regulator in two-component regulatory system with PhoQ	LS398110.1	5188881	5189555	-	BRAD3257_5589	5190051	63.6346	CtrA
Rhizobiales	Bradyrhizobium vignae	GCA_900324035.1	SPP92558.1	conserved protein of unknown function	LS398110.1	1361102	1361755	+	BRAD3257_1427	1362272	16.7027	ChpT
Rhizobiales	Bradyrhizobium vignae	GCA_900324035.1	SPP99213.1	conserved protein of unknown function	LS398110.1	7875657	7876169	+	BRAD3257_8629	7876827	96.5768	GcrA
Rhizobiales	Bradyrhizobium vignae	GCA_900324035.1	SPP91386.1	Chromosome-partitioning protein ParB	LS398110.1	204374	205261	+	BRAD3257_0213	205544	2.52015	ParB
Rhizobiales	Bradyrhizobium vignae	GCA_900324035.1	SPP97438.1	Modification methylase SmeI	LS398110.1	6073258	6074388	+	BRAD3257_6543	6074428	74.4778	CcrM
Rhizobiales	Bradyrhizobium vignae	GCA_900324035.1	SPP96510.1	Two-component sensor histidine kinase	LS398110.1	5164077	5166407	+	BRAD3257_5570	5165247	63.3305	DivL
Rhizobiales	Bradyrhizobium vignae	GCA_900324035.1	SPP91179.1	Chromosomal replication initiator protein DnaA	LS398110.1	87	1496	+	BRAD3257_0001	1257	0.0154119	DnaA
Rhizobiales	Brucella abortus bv. 1 str. 9-941	GCA_000008145.1	AAX75334.1	ParB%2C chromosome partitioning protein ParB	AE017223.1	1999235	2000116	-	BruAb1_2033	2112957	99.4688	ParB
Rhizobiales	Brucella abortus bv. 1 str. 9-941	GCA_000008145.1	AAX73904.1	BabI%2C modification methylase BabI	AE017223.1	512118	513251	+	BruAb1_0513	625840	29.4618	CcrM
Rhizobiales	Brucella abortus bv. 1 str. 9-941	GCA_000008145.1	AAX74393.1	sensory box histidine kinase/response regulator	AE017223.1	1022936	1025773	+	BruAb1_1044	1136658	53.5089	CckA
Rhizobiales	Brucella abortus bv. 1 str. 9-941	GCA_000008145.1	AAX75335.1	ParA%2C chromosome partitioning protein	AE017223.1	2000160	2000957	-	BruAb1_2034	2113882	99.5123	ParA
Rhizobiales	Brucella abortus bv. 1 str. 9-941	GCA_000008145.1	AAX74455.1	ClpX%2C ATP-dependent Clp protease%2C ATP-binding subunit ClpX	AE017223.1	1101339	1102613	-	BruAb1_1114	1215061	57.1998	ClpX
Rhizobiales	Brucella abortus bv. 1 str. 9-941	GCA_000008145.1	AAX74010.1	histidine kinase	AE017223.1	630763	633114	-	BruAb1_0635	744485	35.0471	DivL
Rhizobiales	Brucella abortus bv. 1 str. 9-941	GCA_000008145.1	AAX75373.1	sensory box histidine kinase%2C hypothetical	AE017223.1	2035921	2038500	+	BruAb1_2074	25402	1.19582	DivL
Rhizobiales	Brucella abortus bv. 1 str. 9-941	GCA_000008145.1	AAX74910.1	conserved hypothetical protein	AE017223.1	1560952	1561581	+	BruAb1_1585	1674674	78.8363	ChpT
Rhizobiales	Brucella abortus bv. 1 str. 9-941	GCA_000008145.1	AAX73998.1	DNA-binding response regulator	AE017223.1	614537	615226	+	BruAb1_0623	728259	34.2833	CtrA
Rhizobiales	Brucella abortus bv. 1 str. 9-941	GCA_000008145.1	AAX73424.1	DnaA%2C chromosomal replication initiator protein	AE017223.1	784	2274	+	BruAb1_0001	114506	5.39044	DnaA
Rhizobiales	Brucella abortus bv. 1 str. 9-941	GCA_000008145.1	AAX73725.1	conserved hypothetical protein	AE017223.1	333561	334103	-	BruAb1_0325	447283	21.0561	GcrA
Rhizobiales	Brucella canis ATCC 23365	GCA_000018525.1	ABX62176.1	ATP-dependent Clp protease%2C ATP-binding subunit ClpX	CP000872.1	1082870	1084144	-	BCAN_A1127	1196814	56.8296	ClpX
Rhizobiales	Brucella canis ATCC 23365	GCA_000018525.1	ABX62105.1	PAS domain S-box	CP000872.1	1002535	1005231	+	BCAN_A1052	1116479	53.015	CckA
Rhizobiales	Brucella canis ATCC 23365	GCA_000018525.1	ABX62654.1	Hypothetical protein	CP000872.1	1541844	1542473	+	BCAN_A1633	1655788	78.6236	ChpT
Rhizobiales	Brucella canis ATCC 23365	GCA_000018525.1	ABX63088.1	parB-like partition protein	CP000872.1	1980741	1981622	-	BCAN_A2104	2094685	99.4642	ParB
Rhizobiales	Brucella canis ATCC 23365	GCA_000018525.1	ABX63089.1	Hypothetical protein	CP000872.1	1981666	1982463	-	BCAN_A2105	2095610	99.5081	ParA
Rhizobiales	Brucella canis ATCC 23365	GCA_000018525.1	ABX61108.1	chromosomal replication initiator protein DnaA	CP000872.1	634	2274	+	BCAN_A0001	114578	5.44063	DnaA
Rhizobiales	Brucella canis ATCC 23365	GCA_000018525.1	ABX61707.1	multi-sensor signal transduction histidine kinase	CP000872.1	608002	610353	-	BCAN_A0632	721946	34.2809	DivL
Rhizobiales	Brucella canis ATCC 23365	GCA_000018525.1	ABX61694.1	two component transcriptional regulator%2C winged helix family	CP000872.1	591776	592465	+	BCAN_A0619	705720	33.5105	CtrA
Rhizobiales	Brucella canis ATCC 23365	GCA_000018525.1	ABX61396.1	GcrA cell cycle regulator	CP000872.1	311658	312200	-	BCAN_A0305	425602	20.2093	GcrA
Rhizobiales	Brucella canis ATCC 23365	GCA_000018525.1	ABX61580.1	Modification methylase HinfI	CP000872.1	490492	491625	+	BCAN_A0500	604436	28.7011	CcrM
Rhizobiales	Brucella canis ATCC 23365	GCA_000018525.1	ABX63127.1	histidine kinase	CP000872.1	2017501	2020080	+	BCAN_A2144	25476	1.2097	DivL
Rhizobiales	Brucella melitensis ATCC 23457	GCA_000022625.1	ACO01350.1	Hypothetical protein%2C conserved	CP001488.1	1563151	1563780	+	BMEA_A1650	1677093	78.896	ChpT
Rhizobiales	Brucella melitensis ATCC 23457	GCA_000022625.1	ACO01768.1	parB-like partition protein	CP001488.1	2000546	2001427	-	BMEA_A2119	2114488	99.4725	ParB
Rhizobiales	Brucella melitensis ATCC 23457	GCA_000022625.1	ACO01806.1	histidine kinase	CP001488.1	2037233	2039812	+	BMEA_A2160	25474	1.19838	DivL
Rhizobiales	Brucella melitensis ATCC 23457	GCA_000022625.1	ACO00125.1	GcrA cell cycle regulator	CP001488.1	332613	333155	-	BMEA_A0335	446555	21.0074	GcrA
Rhizobiales	Brucella melitensis ATCC 23457	GCA_000022625.1	ACO00408.1	two component transcriptional regulator%2C winged helix family protein	CP001488.1	613133	613822	+	BMEA_A0642	727075	34.204	CtrA
Rhizobiales	Brucella melitensis ATCC 23457	GCA_000022625.1	ACO00420.1	PAS domain S-box-containing protein	CP001488.1	629359	631710	-	BMEA_A0654	743301	34.9673	DivL
Rhizobiales	Brucella melitensis ATCC 23457	GCA_000022625.1	ACO00306.1	Modification methylase HinfI	CP001488.1	510593	511726	+	BMEA_A0528	624535	29.3802	CcrM
Rhizobiales	Brucella melitensis ATCC 23457	GCA_000022625.1	ACO01769.1	Hypothetical protein%2C conserved	CP001488.1	2001471	2002268	-	BMEA_A2120	2115413	99.516	ParA
Rhizobiales	Brucella melitensis ATCC 23457	GCA_000022625.1	ACN99825.1	chromosomal replication initiator protein DnaA	CP001488.1	634	2274	+	BMEA_A0001	114576	5.39003	DnaA
Rhizobiales	Brucella melitensis ATCC 23457	GCA_000022625.1	ACO00888.1	ATP-dependent Clp protease%2C ATP-binding subunit ClpX	CP001488.1	1103205	1104479	-	BMEA_A1153	1217147	57.2586	ClpX
Rhizobiales	Brucella melitensis ATCC 23457	GCA_000022625.1	ACO00821.1	PAS domain S-box-containing protein	CP001488.1	1022880	1025576	+	BMEA_A1079	1136822	53.4799	CckA
Rhizobiales	Brucella microti CCM 4915	GCA_000022745.1	ACU49018.1	chromosome partitioning protein ParB	CP001578.1	1991570	1992451	-	BMI_I2080	2105766	99.467	ParB
Rhizobiales	Brucella microti CCM 4915	GCA_000022745.1	ACU48573.1	hypothetical protein	CP001578.1	1551141	1551770	+	BMI_I1611	1665337	78.6631	ChpT
Rhizobiales	Brucella microti CCM 4915	GCA_000022745.1	ACU47317.1	hypothetical protein	CP001578.1	313336	313878	-	BMI_I305	427532	20.1947	GcrA
Rhizobiales	Brucella microti CCM 4915	GCA_000022745.1	ACU47602.1	DNA-binding response regulator	CP001578.1	595279	595968	+	BMI_I603	709475	33.5124	CtrA
Rhizobiales	Brucella microti CCM 4915	GCA_000022745.1	ACU47614.1	sensory box histidine kinase	CP001578.1	611505	613856	-	BMI_I615	725701	34.2789	DivL
Rhizobiales	Brucella microti CCM 4915	GCA_000022745.1	ACU49059.1	sensory box histidine kinase%2C putative	CP001578.1	2028319	2030898	+	BMI_I2121	25465	1.20285	DivL
Rhizobiales	Brucella microti CCM 4915	GCA_000022745.1	ACU47023.1	chromosomal replication initiation protein	CP001578.1	784	2274	+	BMI_I1	114980	5.43114	DnaA
Rhizobiales	Brucella microti CCM 4915	GCA_000022745.1	ACU48096.1	ATP-dependent protease ATP-binding subunit	CP001578.1	1089532	1090806	-	BMI_I1120	1203728	56.8587	ClpX
Rhizobiales	Brucella microti CCM 4915	GCA_000022745.1	ACU47501.1	modification methylase BabI	CP001578.1	492550	493683	+	BMI_I493	606746	28.66	CcrM
Rhizobiales	Brucella microti CCM 4915	GCA_000022745.1	ACU49019.1	chromosome partitioning protein ParA	CP001578.1	1992495	1993292	-	BMI_I2081	2106691	99.5107	ParA
Rhizobiales	Brucella microti CCM 4915	GCA_000022745.1	ACU48022.1	sensory box histidine kinase/response regulator	CP001578.1	1008213	1011050	+	BMI_I1042	1122409	53.0176	CckA
Rhizobiales	Brucella pinnipedialis B2/94	GCA_000221005.1	AEK53826.1	modification methylase BabI	CP002078.1	511883	513016	+	BPI_I520	625987	29.2744	CcrM
Rhizobiales	Brucella pinnipedialis B2/94	GCA_000221005.1	AEK55338.1	chromosome partitioning protein ParA	CP002078.1	2013879	2014676	-	BPI_I2117	2127983	99.5156	ParA
Rhizobiales	Brucella pinnipedialis B2/94	GCA_000221005.1	AEK55337.1	chromosome partitioning protein ParB	CP002078.1	2012954	2013835	-	BPI_I2116	2127058	99.4723	ParB
Rhizobiales	Brucella pinnipedialis B2/94	GCA_000221005.1	AEK53951.1	sensory box histidine kinase	CP002078.1	634221	636572	-	BPI_I653	748325	34.9956	DivL
Rhizobiales	Brucella pinnipedialis B2/94	GCA_000221005.1	AEK53641.1	hypothetical protein	CP002078.1	333429	333971	-	BPI_I334	447533	20.929	GcrA
Rhizobiales	Brucella pinnipedialis B2/94	GCA_000221005.1	AEK53327.1	chromosomal replication initiator protein DnaA	CP002078.1	785	2275	+	BPI_I1	114889	5.37281	DnaA
Rhizobiales	Brucella pinnipedialis B2/94	GCA_000221005.1	AEK53939.1	DNA-binding response regulator	CP002078.1	617995	618684	+	BPI_I641	732099	34.2368	CtrA
Rhizobiales	Brucella pinnipedialis B2/94	GCA_000221005.1	AEK54901.1	hypothetical protein	CP002078.1	1573765	1574394	+	BPI_I1651	1687869	78.9335	ChpT
Rhizobiales	Brucella pinnipedialis B2/94	GCA_000221005.1	AEK54355.1	sensory box histidine kinase/response regulator	CP002078.1	1029714	1032551	+	BPI_I1080	1143818	53.4909	CckA
Rhizobiales	Brucella pinnipedialis B2/94	GCA_000221005.1	AEK55378.1	sensory box histidine kinase	CP002078.1	2049714	2052293	+	BPI_I2157	25476	1.19139	DivL
Rhizobiales	Brucella pinnipedialis B2/94	GCA_000221005.1	AEK54424.1	ATP-dependent protease%2C ATP-binding subunit ClpX	CP002078.1	1110256	1111530	-	BPI_I1155	1224360	57.2574	ClpX
Rhizobiales	Brucella sp. 09RB8910	GCA_001971805.1	APY13371.1	restriction endonuclease subunit M	CP019390.1	524233	525366	-	BKD02_02785	1785860	78.2988	CcrM
Rhizobiales	Brucella sp. 09RB8910	GCA_001971805.1	APY13533.1	GcrA cell cycle regulator	CP019390.1	704786	705328	+	BKD02_03760	1966413	86.2149	GcrA
Rhizobiales	Brucella sp. 09RB8910	GCA_001971805.1	APY13279.1	PAS domain-containing sensor histidine kinase	CP019390.1	409204	411555	+	BKD02_02215	1670831	73.2555	DivL
Rhizobiales	Brucella sp. 09RB8910	GCA_001971805.1	APY13887.1	chromosome partitioning protein ParB	CP019390.1	1146388	1147269	+	BKD02_05925	127188	5.5764	ParB
Rhizobiales	Brucella sp. 09RB8910	GCA_001971805.1	APY13290.1	DNA-binding response regulator	CP019390.1	427077	427766	-	BKD02_02275	1688704	74.0391	CtrA
Rhizobiales	Brucella sp. 09RB8910	GCA_001971805.1	APY13886.1	chromosome partitioning protein ParA	CP019390.1	1145547	1146344	+	BKD02_05920	126347	5.53953	ParA
Rhizobiales	Brucella sp. 09RB8910	GCA_001971805.1	APY14354.1	histidine phosphotransferase	CP019390.1	1676806	1677435	-	BKD02_08835	657606	28.8319	ChpT
Rhizobiales	Brucella sp. 09RB8910	GCA_001971805.1	APY15097.1	hybrid sensor histidine kinase/response regulator	CP019390.1	2208663	2211236	+	BKD02_11585	1189463	52.1505	CckA
Rhizobiales	Brucella sp. 09RB8910	GCA_001971805.1	APY13849.1	alkaline phosphatase	CP019390.1	1107803	1110382	-	BKD02_05710	88603	3.88469	DivL
Rhizobiales	Brucella sp. 09RB8910	GCA_001971805.1	APY12908.1	ATP-dependent Clp protease ATP-binding subunit ClpX	CP019390.1	21274	22548	-	BKD02_00100	1282901	56.2472	ClpX
Rhizobiales	Brucella sp. 09RB8910	GCA_001971805.1	APY13778.1	chromosomal replication initiation protein DnaA	CP019390.1	1019254	1020894	-	BKD02_05290	54	0.00236756	DnaA
Rhizobiales	Brucella sp. 2002734562	GCA_001715385.1	AOG44189.1	histidine phosphotransferase	CP016979.1	1558095	1558724	+	BFS01_07665	1671817	78.8093	ChpT
Rhizobiales	Brucella sp. 2002734562	GCA_001715385.1	AOG43352.1	DNA-binding response regulator	CP016979.1	610826	611515	+	BFS01_02985	724548	34.1551	CtrA
Rhizobiales	Brucella sp. 2002734562	GCA_001715385.1	AOG44558.1	chromosome partitioning protein ParA	CP016979.1	1997264	1998061	-	BFS01_09800	2110986	99.5117	ParA
Rhizobiales	Brucella sp. 2002734562	GCA_001715385.1	AOG43097.1	GcrA cell cycle regulator	CP016979.1	329920	330462	-	BFS01_01575	443642	20.9132	GcrA
Rhizobiales	Brucella sp. 2002734562	GCA_001715385.1	AOG44759.1	hybrid sensor histidine kinase/response regulator	CP016979.1	1020311	1022884	+	BFS01_05045	1134033	53.4582	CckA
Rhizobiales	Brucella sp. 2002734562	GCA_001715385.1	AOG44557.1	chromosome partitioning protein ParB	CP016979.1	1996339	1997220	-	BFS01_09795	2110061	99.4681	ParB
Rhizobiales	Brucella sp. 2002734562	GCA_001715385.1	AOG43364.1	PAS domain-containing sensor histidine kinase	CP016979.1	627052	629403	-	BFS01_03045	740774	34.92	DivL
Rhizobiales	Brucella sp. 2002734562	GCA_001715385.1	AOG43257.1	modification methylase	CP016979.1	508405	509538	+	BFS01_02440	622127	29.327	CcrM
Rhizobiales	Brucella sp. 2002734562	GCA_001715385.1	AOG43773.1	ATP-dependent protease ATP-binding subunit ClpX	CP016979.1	1098481	1099755	-	BFS01_05390	1212203	57.1431	ClpX
Rhizobiales	Brucella sp. 2002734562	GCA_001715385.1	AOG44829.1	alkaline phosphatase	CP016979.1	2033025	2035604	+	BFS01_09995	25402	1.19745	DivL
Rhizobiales	Brucella sp. 2002734562	GCA_001715385.1	AOG42828.1	chromosomal replication initiation protein DnaA	CP016979.1	634	2274	+	BFS01_00005	114356	5.39073	DnaA
Rhizobiales	Brucella suis 1330	GCA_000007505.1	AAN28959.1	chromosomal replication initiator protein DnaA	AE014291.4	784	2274	+	BR0001	114721	5.4427	DnaA
Rhizobiales	Brucella suis 1330	GCA_000007505.1	AAN30028.1	ATP-dependent Clp protease%2C ATP-binding subunit ClpX	AE014291.4	1083978	1085252	-	BR1108	1197915	56.8326	ClpX
Rhizobiales	Brucella suis 1330	GCA_000007505.1	AAN30948.1	chromosome partitioning protein ParB	AE014291.4	1982573	1983454	-	BR2058	2096510	99.4647	ParB
Rhizobiales	Brucella suis 1330	GCA_000007505.1	AAN29545.1	sensory box histidine kinase	AE014291.4	609266	611617	-	BR0616	723203	34.3109	DivL
Rhizobiales	Brucella suis 1330	GCA_000007505.1	AAN29434.1	modification methylase BabI	AE014291.4	490426	491559	+	BR0491	604363	28.6728	CcrM
Rhizobiales	Brucella suis 1330	GCA_000007505.1	AAN30989.1	sensory box histidine kinase%2C putative	AE014291.4	2019333	2021912	+	BR2099	25476	1.20866	DivL
Rhizobiales	Brucella suis 1330	GCA_000007505.1	AAN29248.1	conserved hypothetical protein	AE014291.4	311669	312211	-	BR0299	425606	20.192	GcrA
Rhizobiales	Brucella suis 1330	GCA_000007505.1	AAN30503.1	conserved hypothetical protein	AE014291.4	1542887	1543516	+	BR1598	1656824	78.6046	ChpT
Rhizobiales	Brucella suis 1330	GCA_000007505.1	AAN29533.1	DNA-binding response regulator	AE014291.4	593040	593729	+	BR0604	706977	33.5411	CtrA
Rhizobiales	Brucella suis 1330	GCA_000007505.1	AAN29960.1	sensory box histidine kinase/response regulator	AE014291.4	1003944	1006781	+	BR1039	1117881	53.0356	CckA
Rhizobiales	Brucella suis 1330	GCA_000007505.1	AAN30949.1	chromosome partitioning protein ParA	AE014291.4	1983498	1984295	-	BR2059	2097435	99.5085	ParA
Rhizobiales	Candidatus Liberibacter asiaticus str. psy62	GCA_000023765.2	ACT56904.1	hypothetical protein	CP001677.5	337920	338456	-	CLIBASIA_01580	1122760	91.48	GcrA
Rhizobiales	Candidatus Liberibacter asiaticus str. psy62	GCA_000023765.2	ACT56939.1	putative modification methylase	CP001677.5	386844	387971	+	CLIBASIA_01755	1171684	95.4662	CcrM
Rhizobiales	Candidatus Liberibacter asiaticus str. psy62	GCA_000023765.2	ACT57364.1	hypothetical protein	CP001677.5	867295	867942	+	CLIBASIA_03940	424807	34.6123	ChpT
Rhizobiales	Candidatus Liberibacter asiaticus str. psy62	GCA_000023765.2	ACT57278.1	chromosome partitioning protein B	CP001677.5	450712	451614	+	CLIBASIA_03480	8224	0.670074	ParB
Rhizobiales	Candidatus Liberibacter asiaticus str. psy62	GCA_000023765.2	ACT56923.1	two-component sensor histidine kinase/response regulator hybrid protein	CP001677.5	362702	365113	+	CLIBASIA_01675	1147542	93.4992	CckA
Rhizobiales	Candidatus Liberibacter asiaticus str. psy62	GCA_000023765.2	ACT57376.1	two-component sensor histidine kinase protein	CP001677.5	881796	884096	-	CLIBASIA_04010	439308	35.7939	DivL
Rhizobiales	Candidatus Liberibacter asiaticus str. psy62	GCA_000023765.2	ACT57298.2	two-component sensor histidine kinase protein	CP001677.5	424002	426380	+	CLIBASIA_03590	1208842	98.4938	DivL
Rhizobiales	Candidatus Liberibacter asiaticus str. psy62	GCA_000023765.2	ACT56744.1	ATP-dependent protease ATP-binding subunit ClpX	CP001677.5	153788	155062	-	CLIBASIA_00780	938628	76.4774	ClpX
Rhizobiales	Candidatus Liberibacter asiaticus str. psy62	GCA_000023765.2	ACT57279.1	chromosome partitioning protein A	CP001677.5	449900	450697	+	CLIBASIA_03485	7412	0.603914	ParA
Rhizobiales	Candidatus Liberibacter asiaticus str. psy62	GCA_000023765.2	ACT57100.1	chromosomal replication initiation protein	CP001677.5	643376	644884	-	CLIBASIA_02570	200888	16.3679	DnaA
Rhizobiales	Chelatococcus sp. CO-6	GCA_001271345.1	ALA16974.1	histidine phosphotransferase	CP012398.1	1188405	1189052	-	AL346_05600	3947924	89.8471	ChpT
Rhizobiales	Chelatococcus sp. CO-6	GCA_001271345.1	ALA18153.1	modification methylase	CP012398.1	2757875	2759053	+	AL346_12975	1123348	25.5652	CcrM
Rhizobiales	Chelatococcus sp. CO-6	GCA_001271345.1	ALA18309.1	transcriptional regulator	CP012398.1	2953572	2954237	+	AL346_13970	1319045	30.0189	CtrA
Rhizobiales	Chelatococcus sp. CO-6	GCA_001271345.1	ALA17567.1	GcrA cell cycle regulator	CP012398.1	1980226	1980771	-	AL346_09310	345699	7.86744	GcrA
Rhizobiales	Chelatococcus sp. CO-6	GCA_001271345.1	ALA17214.1	histidine kinase	CP012398.1	1500810	1503302	+	AL346_07095	4260329	96.9569	DivL
Rhizobiales	Chelatococcus sp. CO-6	GCA_001271345.1	ALA16269.1	histidine kinase	CP012398.1	209213	211708	-	AL346_01165	2968732	67.5626	CckA
Rhizobiales	Chelatococcus sp. CO-6	GCA_001271345.1	ALA17297.1	chromosome partitioning protein ParB	CP012398.1	1623600	1624481	-	AL346_07600	4383119	99.7513	ParB
Rhizobiales	Chelatococcus sp. CO-6	GCA_001271345.1	ALA19557.1	chromosome partitioning protein ParA	CP012398.1	1624599	1625411	-	AL346_07605	4384118	99.7741	ParA
Rhizobiales	Chelatococcus sp. CO-6	GCA_001271345.1	ALA18875.1	Clp protease	CP012398.1	3733518	3734783	+	AL346_17520	2098991	47.769	ClpX
Rhizobiales	Chelatococcus sp. CO-6	GCA_001271345.1	ALA18320.1	histidine kinase	CP012398.1	2969203	2971506	-	AL346_14030	1334676	30.3746	DivL
Rhizobiales	Chelatococcus sp. CO-6	GCA_001271345.1	ALA19540.1	chromosomal replication initiation protein	CP012398.1	1431182	1432663	+	AL346_06765	4190701	95.3723	DnaA
Rhizobiales	Devosia sp. I507	GCA_002949085.1	AVF04181.1	histidine phosphotransferase	CP026747.1	2266858	2267535	-	C4375_10975	602818	15.0482	ChpT
Rhizobiales	Devosia sp. I507	GCA_002949085.1	AVF03670.1	chromosome partitioning protein ParB	CP026747.1	1672419	1673294	+	C4375_08000	8379	0.209166	ParB
Rhizobiales	Devosia sp. I507	GCA_002949085.1	AVF03299.1	hypothetical protein	CP026747.1	1260307	1262769	-	C4375_05875	3602183	89.9216	DivL
Rhizobiales	Devosia sp. I507	GCA_002949085.1	AVF04955.1	hybrid sensor histidine kinase/response regulator	CP026747.1	3166595	3169165	+	C4375_15430	1502555	37.5084	CckA
Rhizobiales	Devosia sp. I507	GCA_002949085.1	AVF02746.1	modification methylase	CP026747.1	592440	593576	+	C4375_02700	2934316	73.2496	CcrM
Rhizobiales	Devosia sp. I507	GCA_002949085.1	AVF02487.1	DNA-binding response regulator	CP026747.1	292098	292757	-	C4375_01265	2633974	65.7521	CtrA
Rhizobiales	Devosia sp. I507	GCA_002949085.1	AVF05818.1	chromosomal replication initiator protein DnaA	CP026747.1	1437728	1439173	-	C4375_06800	3779604	94.3506	DnaA
Rhizobiales	Devosia sp. I507	GCA_002949085.1	AVF05572.1	ATP-dependent Clp protease ATP-binding subunit ClpX	CP026747.1	3879823	3881100	-	C4375_18975	2215783	55.3128	ClpX
Rhizobiales	Devosia sp. I507	GCA_002949085.1	AVF03669.1	chromosome partitioning protein ParA	CP026747.1	1671609	1672409	+	C4375_07995	7569	0.188946	ParA
Rhizobiales	Ensifer adhaerens	GCA_000697965.2	ANK71150.1	chromosomal replication initiation protein DnaA	CP015880.1	1144	2589	+	FA04_00005	405132	9.95121	DnaA
Rhizobiales	Ensifer adhaerens	GCA_000697965.2	ANK71656.1	modification methylase	CP015880.1	610442	611572	+	FA04_02815	1014430	24.9173	CcrM
Rhizobiales	Ensifer adhaerens	GCA_000697965.2	ANK74326.1	alkaline phosphatase	CP015880.1	3708941	3711421	-	FA04_17910	41744	1.02535	DivL
Rhizobiales	Ensifer adhaerens	GCA_000697965.2	ANK73707.1	histidine phosphotransferase	CP015880.1	2956071	2956721	-	FA04_14415	3360059	82.5327	ChpT
Rhizobiales	Ensifer adhaerens	GCA_000697965.2	ANK72531.1	hybrid sensor histidine kinase/response regulator	CP015880.1	1626727	1629345	-	FA04_07780	2030715	49.8802	CckA
Rhizobiales	Ensifer adhaerens	GCA_000697965.2	ANK71820.1	DNA-binding response regulator	CP015880.1	786537	787208	+	FA04_03750	1190525	29.2427	CtrA
Rhizobiales	Ensifer adhaerens	GCA_000697965.2	ANK74284.1	chromosome partitioning protein ParA	CP015880.1	3659047	3659841	-	FA04_17685	4063035	99.7998	ParA
Rhizobiales	Ensifer adhaerens	GCA_000697965.2	ANK71285.1	GcrA cell cycle regulator	CP015880.1	158577	159098	-	FA04_00740	562565	13.8182	GcrA
Rhizobiales	Ensifer adhaerens	GCA_000697965.2	ANK71831.1	PAS domain-containing sensor histidine kinase	CP015880.1	800692	803019	-	FA04_03805	1204680	29.5904	DivL
Rhizobiales	Ensifer adhaerens	GCA_000697965.2	ANK72033.1	ATP-dependent protease ATP-binding subunit ClpX	CP015880.1	1042230	1043507	+	FA04_04945	1446218	35.5233	ClpX
Rhizobiales	Ensifer adhaerens	GCA_000697965.2	ANK74283.1	chromosome partitioning protein ParB	CP015880.1	3658121	3659011	-	FA04_17680	4062109	99.7771	ParB
Rhizobiales	Hartmannibacter diazotrophicus	GCA_900231165.1	SON54674.1	Modification methylase DpnIIB	LT960614.1	1221978	1223141	+	HDIA_1133	1483865	27.8532	CcrM
Rhizobiales	Hartmannibacter diazotrophicus	GCA_900231165.1	SON58178.1	Sporulation initiation inhibitor protein soj	LT960614.1	5055098	5055934	-	HDIA_4637	5316985	99.8037	ParA
Rhizobiales	Hartmannibacter diazotrophicus	GCA_900231165.1	SON54108.1	GcrA cell cycle regulator	LT960614.1	617071	617583	+	HDIA_0567	878958	16.4987	GcrA
Rhizobiales	Hartmannibacter diazotrophicus	GCA_900231165.1	SON56200.1	Blue-light-activated protein	LT960614.1	2839453	2842002	-	HDIA_2659	3101340	58.2144	CckA
Rhizobiales	Hartmannibacter diazotrophicus	GCA_900231165.1	SON58177.1	Chromosome-partitioning protein ParB	LT960614.1	5054170	5055060	-	HDIA_4636	5316057	99.7863	ParB
Rhizobiales	Hartmannibacter diazotrophicus	GCA_900231165.1	SON55574.1	ATP-dependent Clp protease ATP-binding subunit ClpX	LT960614.1	2170018	2171283	+	HDIA_2033	2431905	45.6486	ClpX
Rhizobiales	Hartmannibacter diazotrophicus	GCA_900231165.1	SON53570.1	Sensor protein DivL	LT960614.1	33576	36065	+	HDIA_0029	295463	5.54606	DivL
Rhizobiales	Hartmannibacter diazotrophicus	GCA_900231165.1	SON57091.1	hypothetical protein	LT960614.1	3832228	3832908	-	HDIA_3550	4094115	76.8495	ChpT
Rhizobiales	Hartmannibacter diazotrophicus	GCA_900231165.1	SON54896.1	Transcriptional regulatory protein PhoP	LT960614.1	1462927	1463592	+	HDIA_1355	1724814	32.376	CtrA
Rhizobiales	Hartmannibacter diazotrophicus	GCA_900231165.1	SON54990.1	Non-motile and phage-resistance protein	LT960614.1	1569978	1572434	-	HDIA_1449	1831865	34.3854	DivL
Rhizobiales	Hartmannibacter diazotrophicus	GCA_900231165.1	SON53542.1	Chromosomal replication initiator protein DnaA	LT960614.1	25	1503	+	HDIA_0001	261912	4.91628	DnaA
Rhizobiales	Hyphomicrobium nitrativorans NL23	GCA_000503895.1	AHB48660.1	ATP-dependent protease	CP006912.1	2095646	2096899	+	W911_10100	1685778	46.1372	ClpX
Rhizobiales	Hyphomicrobium nitrativorans NL23	GCA_000503895.1	AHB49725.1	histidine kinase	CP006912.1	3587143	3589659	+	W911_17155	3177275	86.9572	DivL
Rhizobiales	Hyphomicrobium nitrativorans NL23	GCA_000503895.1	AHB47991.1	modification methylase	CP006912.1	1184749	1185879	-	W911_05615	774881	21.2073	CcrM
Rhizobiales	Hyphomicrobium nitrativorans NL23	GCA_000503895.1	AHB47281.1	chromosomal replication initiation protein	CP006912.1	193668	195242	-	W911_00885	3437637	94.0829	DnaA
Rhizobiales	Hyphomicrobium nitrativorans NL23	GCA_000503895.1	AHB49501.1	hypothetical protein	CP006912.1	3244380	3245027	+	W911_15600	2834512	77.5763	ChpT
Rhizobiales	Hyphomicrobium nitrativorans NL23	GCA_000503895.1	AHB48985.1	histidine kinase	CP006912.1	2534073	2536652	-	W911_12160	2124205	58.1363	CckA
Rhizobiales	Hyphomicrobium nitrativorans NL23	GCA_000503895.1	AHB47438.1	chromosome partitioning protein ParA	CP006912.1	422176	423000	+	W911_01930	12308	0.336851	ParA
Rhizobiales	Hyphomicrobium nitrativorans NL23	GCA_000503895.1	AHB49032.1	transcriptional regulator	CP006912.1	2601506	2602177	-	W911_12450	2191638	59.9818	CtrA
Rhizobiales	Hyphomicrobium nitrativorans NL23	GCA_000503895.1	AHB47439.1	chromosome partitioning protein ParB	CP006912.1	423029	423931	+	W911_01935	13161	0.360197	ParB
Rhizobiales	Hyphomicrobium nitrativorans NL23	GCA_000503895.1	AHB47259.1	GcrA cell cycle regulator	CP006912.1	171867	172430	+	W911_00770	3415836	93.4863	GcrA
Rhizobiales	Liberibacter crescens	GCA_001543305.1	AMC12413.1	hypothetical protein	CP010522.1	227136	227648	+	RL73_00935	189014	12.4178	GcrA
Rhizobiales	Liberibacter crescens	GCA_001543305.1	AMC12375.1	modification methylase	CP010522.1	152270	153400	-	RL73_00645	114148	7.49928	CcrM
Rhizobiales	Liberibacter crescens	GCA_001543305.1	AMC12309.1	chromosome partitioning protein ParB	CP010522.1	46410	47294	+	RL73_00205	8288	0.544504	ParB
Rhizobiales	Liberibacter crescens	GCA_001543305.1	AMC13185.1	transcriptional regulator	CP010522.1	1421527	1422198	-	RL73_06325	1383405	90.8868	CtrA
Rhizobiales	Liberibacter crescens	GCA_001543305.1	AMC12936.1	Clp protease ATP-binding protein	CP010522.1	1040238	1041515	-	RL73_04610	1002116	65.8369	ClpX
Rhizobiales	Liberibacter crescens	GCA_001543305.1	AMC12293.1	alkaline phosphatase	CP010522.1	18044	20440	+	RL73_00095	1502041	98.6809	DivL
Rhizobiales	Liberibacter crescens	GCA_001543305.1	AMC13032.1	histidine phosphotransferase	CP010522.1	1183695	1184339	-	RL73_05255	1145573	75.2617	ChpT
Rhizobiales	Liberibacter crescens	GCA_001543305.1	AMC13141.1	chromosomal replication initiation protein	CP010522.1	1355510	1357015	+	RL73_06030	1317388	86.5496	DnaA
Rhizobiales	Liberibacter crescens	GCA_001543305.1	AMC12308.1	chromosome partitioning protein ParA	CP010522.1	45600	46394	+	RL73_00200	7478	0.491289	ParA
Rhizobiales	Liberibacter crescens	GCA_001543305.1	AMC12395.1	histidine kinase	CP010522.1	188510	191134	+	RL73_00790	150388	9.88017	CckA
Rhizobiales	Martelella endophytica	GCA_000960975.1	AJY47636.1	histidine phosphotransferase	CP010803.1	4567655	4568299	-	TM49_21320	3487337	72.3914	ChpT
Rhizobiales	Martelella endophytica	GCA_000960975.1	AJY48411.1	modification methylase	CP010803.1	4491988	4493088	-	TM49_20965	3411670	70.8207	CcrM
Rhizobiales	Martelella endophytica	GCA_000960975.1	AJY46395.1	hypothetical protein	CP010803.1	2878258	2880024	-	TM49_13075	1797940	37.3223	DivL
Rhizobiales	Martelella endophytica	GCA_000960975.1	AJY47975.1	alkaline phosphatase	CP010803.1	1348674	1351148	+	TM49_06190	268356	5.57063	DivL
Rhizobiales	Martelella endophytica	GCA_000960975.1	AJY45182.1	chromosome partitioning protein ParA	CP010803.1	1072418	1073209	-	TM49_04910	4809435	99.836	ParA
Rhizobiales	Martelella endophytica	GCA_000960975.1	AJY47224.1	transcriptional regulator	CP010803.1	4023247	4023909	-	TM49_18545	2942929	61.0904	CtrA
Rhizobiales	Martelella endophytica	GCA_000960975.1	AJY48245.1	Clp protease ATP-binding protein	CP010803.1	3247818	3249095	+	TM49_14850	2167500	44.9938	ClpX
Rhizobiales	Martelella endophytica	GCA_000960975.1	AJY45181.1	chromosome partitioning protein ParB	CP010803.1	1071520	1072398	-	TM49_04905	4808537	99.8174	ParB
Rhizobiales	Martelella endophytica	GCA_000960975.1	AJY46717.1	histidine kinase	CP010803.1	3323422	3326016	+	TM49_15200	2243104	46.5632	CckA
Rhizobiales	Martelella endophytica	GCA_000960975.1	AJY48104.1	chromosomal replication initiation protein	CP010803.1	2241379	2242923	-	TM49_10145	1161061	24.1017	DnaA
Rhizobiales	Martelella mediterranea DSM 17316	GCA_002043005.1	AQZ50120.1	chromosome partitioning protein ParA	CP020330.1	821628	822419	-	Mame_00744	4663373	99.8265	ParA
Rhizobiales	Martelella mediterranea DSM 17316	GCA_002043005.1	AQZ50119.1	Chromosome-partitioning protein ParB	CP020330.1	820733	821617	-	Mame_00743	4662478	99.8074	ParB
Rhizobiales	Martelella mediterranea DSM 17316	GCA_002043005.1	AQZ53050.1	Modification methylase DpnIIB	CP020330.1	4032400	4033521	-	Mame_03746	3202668	68.5579	CcrM
Rhizobiales	Martelella mediterranea DSM 17316	GCA_002043005.1	AQZ49386.1	Chromosomal replication initiator protein DnaA	CP020330.1	13	1551	+	Mame_00001	3841758	82.2386	DnaA
Rhizobiales	Martelella mediterranea DSM 17316	GCA_002043005.1	AQZ52366.1	ATP-dependent Clp protease ATP-binding subunit ClpX	CP020330.1	3272491	3273771	-	Mame_03047	2442759	52.2909	ClpX
Rhizobiales	Martelella mediterranea DSM 17316	GCA_002043005.1	AQZ50802.1	hypothetical protein	CP020330.1	1570858	1571499	+	Mame_01441	741126	15.8649	ChpT
Rhizobiales	Martelella mediterranea DSM 17316	GCA_002043005.1	AQZ52665.1	Blue-light-activated protein	CP020330.1	3623361	3625955	-	Mame_03358	2793629	59.8018	CckA
Rhizobiales	Martelella mediterranea DSM 17316	GCA_002043005.1	AQZ52854.1	Virulence transcriptional regulatory protein PhoP	CP020330.1	3828729	3829391	-	Mame_03549	2998997	64.198	CtrA
Rhizobiales	Martelella mediterranea DSM 17316	GCA_002043005.1	AQZ49974.1	Sensor protein DivL	CP020330.1	661193	663694	-	Mame_00597	4502938	96.3922	DivL
Rhizobiales	Mesorhizobium ciceri	GCA_001618825.1	AMX95864.1	chromosome partitioning protein ParB	CP015062.1	4979182	4980072	-	A4R28_24020	5371562	85.3252	ParB
Rhizobiales	Mesorhizobium ciceri	GCA_001618825.1	AMX91989.1	modification methylase	CP015062.1	450752	451885	+	A4R28_02055	843132	13.3928	CcrM
Rhizobiales	Mesorhizobium ciceri	GCA_001618825.1	AMX92098.1	DNA-binding response regulator	CP015062.1	591565	592230	+	A4R28_02680	983945	15.6296	CtrA
Rhizobiales	Mesorhizobium ciceri	GCA_001618825.1	AMX94530.1	histidine phosphotransferase	CP015062.1	3299967	3300596	+	A4R28_16320	3692347	58.6515	ChpT
Rhizobiales	Mesorhizobium ciceri	GCA_001618825.1	AMX92792.1	hybrid sensor histidine kinase/response regulator	CP015062.1	1394644	1397217	+	A4R28_06625	1787024	28.3862	CckA
Rhizobiales	Mesorhizobium ciceri	GCA_001618825.1	AMX96218.1	alkaline phosphatase	CP015062.1	5389106	5391661	+	A4R28_26060	5781486	91.8367	DivL
Rhizobiales	Mesorhizobium ciceri	GCA_001618825.1	AMX97385.1	chromosome partitioning protein ParA	CP015062.1	4980136	4980933	-	A4R28_24025	5372516	85.3404	ParA
Rhizobiales	Mesorhizobium ciceri	GCA_001618825.1	AMX96679.1	GcrA cell cycle regulator	CP015062.1	5961614	5962132	-	A4R28_28645	58597	0.930791	GcrA
Rhizobiales	Mesorhizobium ciceri	GCA_001618825.1	AMX96634.1	chromosomal replication initiation protein DnaA	CP015062.1	5901469	5903016	-	A4R28_28385	6293849	99.9754	DnaA
Rhizobiales	Mesorhizobium ciceri	GCA_001618825.1	AMX92110.1	PAS domain-containing sensor histidine kinase	CP015062.1	606731	609052	-	A4R28_02745	999111	15.8705	DivL
Rhizobiales	Mesorhizobium ciceri	GCA_001618825.1	AMX97045.1	ATP-dependent Clp protease ATP-binding subunit ClpX	CP015062.1	1057296	1058570	+	A4R28_04960	1449676	23.0276	ClpX
Rhizobiales	Mesorhizobium loti NZP2037	GCA_001676765.1	ANN61089.1	GcrA cell cycle regulator	CP016079.1	6949902	6950420	+	A9174_33385	6023061	85.9538	GcrA
Rhizobiales	Mesorhizobium loti NZP2037	GCA_001676765.1	ANN60101.1	PAS domain-containing sensor histidine kinase	CP016079.1	5680960	5683281	+	A9174_27600	4754119	67.845	DivL
Rhizobiales	Mesorhizobium loti NZP2037	GCA_001676765.1	ANN57237.1	histidine phosphotransferase	CP016079.1	2279880	2280509	-	A9174_11025	1353039	19.3089	ChpT
Rhizobiales	Mesorhizobium loti NZP2037	GCA_001676765.1	ANN56087.1	chromosome partitioning protein ParB	CP016079.1	937893	938780	+	A9174_04425	11052	0.157721	ParB
Rhizobiales	Mesorhizobium loti NZP2037	GCA_001676765.1	ANN59671.1	ATP-dependent protease ATP-binding subunit ClpX	CP016079.1	5174678	5175952	-	A9174_25090	4247837	60.6199	ClpX
Rhizobiales	Mesorhizobium loti NZP2037	GCA_001676765.1	ANN60110.1	DNA-binding response regulator	CP016079.1	5697413	5698078	-	A9174_27660	4770572	68.0798	CtrA
Rhizobiales	Mesorhizobium loti NZP2037	GCA_001676765.1	ANN59124.1	hybrid sensor histidine kinase/response regulator	CP016079.1	4564048	4566624	+	A9174_21895	3637207	51.9058	CckA
Rhizobiales	Mesorhizobium loti NZP2037	GCA_001676765.1	ANN60228.1	modification methylase	CP016079.1	5849855	5850988	-	A9174_28340	4923014	70.2552	CcrM
Rhizobiales	Mesorhizobium loti NZP2037	GCA_001676765.1	ANN55664.1	alkaline phosphatase	CP016079.1	439445	442000	+	A9174_02010	6519930	93.0445	DivL
Rhizobiales	Mesorhizobium loti NZP2037	GCA_001676765.1	ANN56086.1	chromosome partitioning protein ParA	CP016079.1	937014	937811	+	A9174_04420	10173	0.145177	ParA
Rhizobiales	Mesorhizobium loti NZP2037	GCA_001676765.1	ANN55330.1	chromosomal replication initiation protein DnaA	CP016079.1	1	1545	+	A9174_00005	6080486	86.7733	DnaA
Rhizobiales	Mesorhizobium sp. M2A.F.Ca.ET.043.02.1.1	GCA_003952405.1	AZO04212.1	ParB/RepB/Spo0J family partition protein	CP034445.1	3152452	3153345	-	EJ068_14945	6688510	99.8171	ParB
Rhizobiales	Mesorhizobium sp. M2A.F.Ca.ET.043.02.1.1	GCA_003952405.1	AZO05985.1	site-specific DNA-methyltransferase	CP034445.1	5300909	5302042	+	EJ068_25115	2136204	31.88	CcrM
Rhizobiales	Mesorhizobium sp. M2A.F.Ca.ET.043.02.1.1	GCA_003952405.1	AZO04213.1	ParA family protein	CP034445.1	3153411	3154208	-	EJ068_14950	6689469	99.8315	ParA
Rhizobiales	Mesorhizobium sp. M2A.F.Ca.ET.043.02.1.1	GCA_003952405.1	AZO02795.1	histidine phosphotransferase	CP034445.1	1387421	1388050	+	EJ068_06600	4923479	73.4764	ChpT
Rhizobiales	Mesorhizobium sp. M2A.F.Ca.ET.043.02.1.1	GCA_003952405.1	AZO06097.1	response regulator transcription factor	CP034445.1	5441815	5442480	+	EJ068_25750	2277110	33.9828	CtrA
Rhizobiales	Mesorhizobium sp. M2A.F.Ca.ET.043.02.1.1	GCA_003952405.1	AZO04460.1	PAS domain-containing sensor histidine kinase	CP034445.1	3423561	3426140	-	EJ068_16320	258856	3.86308	DivL
Rhizobiales	Mesorhizobium sp. M2A.F.Ca.ET.043.02.1.1	GCA_003952405.1	AZO01830.1	ATP-dependent Clp protease ATP-binding subunit ClpX	CP034445.1	242105	243379	-	EJ068_01175	3778163	56.3841	ClpX
Rhizobiales	Mesorhizobium sp. M2A.F.Ca.ET.043.02.1.1	GCA_003952405.1	AZO05350.1	GcrA cell cycle regulator	CP034445.1	4516229	4516747	-	EJ068_21485	1351524	20.1697	GcrA
Rhizobiales	Mesorhizobium sp. M2A.F.Ca.ET.043.02.1.1	GCA_003952405.1	AZO01700.1	response regulator	CP034445.1	89743	92328	-	EJ068_00450	3625801	54.1103	CckA
Rhizobiales	Mesorhizobium sp. M2A.F.Ca.ET.043.02.1.1	GCA_003952405.1	AZO06108.1	PAS domain S-box protein	CP034445.1	5456609	5458930	-	EJ068_25810	2291904	34.2036	DivL
Rhizobiales	Mesorhizobium sp. M2A.F.Ca.ET.043.02.1.1	GCA_003952405.1	AZO05306.1	chromosomal replication initiator protein DnaA	CP034445.1	4457155	4458702	-	EJ068_21235	1292450	19.2881	DnaA
Rhizobiales	Mesorhizobium sp. M2A.F.Ca.ET.043.05.1.1	GCA_003952445.1	AZO14353.1	ATP-dependent Clp protease ATP-binding subunit ClpX	CP034446.1	1309628	1310902	+	EJ069_06205	2927597	43.377	ClpX
Rhizobiales	Mesorhizobium sp. M2A.F.Ca.ET.043.05.1.1	GCA_003952445.1	AZO17418.1	PAS domain-containing sensor histidine kinase	CP034446.1	4859100	4861679	+	EJ069_23465	6477069	95.9681	DivL
Rhizobiales	Mesorhizobium sp. M2A.F.Ca.ET.043.05.1.1	GCA_003952445.1	AZO15931.1	response regulator transcription factor	CP034446.1	3033555	3034220	-	EJ069_15115	4651524	68.9197	CtrA
Rhizobiales	Mesorhizobium sp. M2A.F.Ca.ET.043.05.1.1	GCA_003952445.1	AZO13395.1	histidine phosphotransferase	CP034446.1	217888	218517	-	EJ069_01005	1835857	27.2011	ChpT
Rhizobiales	Mesorhizobium sp. M2A.F.Ca.ET.043.05.1.1	GCA_003952445.1	AZO17671.1	ParB/RepB/Spo0J family partition protein	CP034446.1	5142994	5143887	+	EJ069_24865	11771	0.174406	ParB
Rhizobiales	Mesorhizobium sp. M2A.F.Ca.ET.043.05.1.1	GCA_003952445.1	AZO16808.1	GcrA cell cycle regulator	CP034446.1	4131431	4131949	+	EJ069_20100	5749400	85.1865	GcrA
Rhizobiales	Mesorhizobium sp. M2A.F.Ca.ET.043.05.1.1	GCA_003952445.1	AZO16850.1	chromosomal replication initiator protein DnaA	CP034446.1	4189631	4191178	+	EJ069_20350	5807600	86.0488	DnaA
Rhizobiales	Mesorhizobium sp. M2A.F.Ca.ET.043.05.1.1	GCA_003952445.1	AZO15919.1	PAS domain S-box protein	CP034446.1	3016973	3019294	+	EJ069_15055	4634942	68.674	DivL
Rhizobiales	Mesorhizobium sp. M2A.F.Ca.ET.043.05.1.1	GCA_003952445.1	AZO16165.1	site-specific DNA-methyltransferase	CP034446.1	3343242	3344375	-	EJ069_16460	4961211	73.5082	CcrM
Rhizobiales	Mesorhizobium sp. M2A.F.Ca.ET.043.05.1.1	GCA_003952445.1	AZO17670.1	ParA family protein	CP034446.1	5142132	5142929	+	EJ069_24860	10909	0.161634	ParA
Rhizobiales	Mesorhizobium sp. M2A.F.Ca.ET.043.05.1.1	GCA_003952445.1	AZO14484.1	response regulator	CP034446.1	1459609	1462194	+	EJ069_06925	3077578	45.5992	CckA
Rhizobiales	Mesorhizobium sp. M2A.F.Ca.ET.046.03.2.1	GCA_003952425.1	AZO35614.1	ParA family protein	CP034449.1	3108231	3109028	+	EJ072_14885	9919	0.134535	ParA
Rhizobiales	Mesorhizobium sp. M2A.F.Ca.ET.046.03.2.1	GCA_003952425.1	AZO38081.1	ATP-dependent Clp protease ATP-binding subunit ClpX	CP034449.1	6155588	6156862	+	EJ072_29285	3057276	41.4669	ClpX
Rhizobiales	Mesorhizobium sp. M2A.F.Ca.ET.046.03.2.1	GCA_003952425.1	AZO34532.1	GcrA cell cycle regulator	CP034449.1	1835142	1835660	+	EJ072_08765	6109637	82.8672	GcrA
Rhizobiales	Mesorhizobium sp. M2A.F.Ca.ET.046.03.2.1	GCA_003952425.1	AZO33448.1	response regulator transcription factor	CP034449.1	395188	395853	-	EJ072_02125	4669683	63.3366	CtrA
Rhizobiales	Mesorhizobium sp. M2A.F.Ca.ET.046.03.2.1	GCA_003952425.1	AZO35348.1	PAS domain-containing sensor histidine kinase	CP034449.1	2811583	2814162	+	EJ072_13370	7086078	96.111	DivL
Rhizobiales	Mesorhizobium sp. M2A.F.Ca.ET.046.03.2.1	GCA_003952425.1	AZO35615.1	ParB/RepB/Spo0J family partition protein	CP034449.1	3109094	3109987	+	EJ072_14890	10782	0.14624	ParB
Rhizobiales	Mesorhizobium sp. M2A.F.Ca.ET.046.03.2.1	GCA_003952425.1	AZO34577.1	chromosomal replication initiator protein DnaA	CP034449.1	1893212	1894759	+	EJ072_09015	6167707	83.6548	DnaA
Rhizobiales	Mesorhizobium sp. M2A.F.Ca.ET.046.03.2.1	GCA_003952425.1	AZO37124.1	histidine phosphotransferase	CP034449.1	5018881	5019510	-	EJ072_23895	1920569	26.0494	ChpT
Rhizobiales	Mesorhizobium sp. M2A.F.Ca.ET.046.03.2.1	GCA_003952425.1	AZO33640.1	site-specific DNA-methyltransferase	CP034449.1	651718	652851	-	EJ072_03235	4926213	66.816	CcrM
Rhizobiales	Mesorhizobium sp. M2A.F.Ca.ET.046.03.2.1	GCA_003952425.1	AZO38220.1	PAS domain-containing sensor histidine kinase	CP034449.1	6307144	6309729	+	EJ072_30040	3208832	43.5225	CckA
Rhizobiales	Mesorhizobium sp. M2A.F.Ca.ET.046.03.2.1	GCA_003952425.1	AZO33439.1	PAS domain S-box protein	CP034449.1	378847	381168	+	EJ072_02065	4653342	63.1149	DivL
Rhizobiales	Mesorhizobium sp. WSM1497	GCA_001672455.2	ARP67426.1	GcrA cell cycle regulator	CP021070.1	6607153	6607671	+	A9K65_032125	5687869	85.3203	GcrA
Rhizobiales	Mesorhizobium sp. WSM1497	GCA_001672455.2	ARP62733.1	chromosome partitioning protein ParB	CP021070.1	930097	930987	+	A9K65_004535	10813	0.162199	ParB
Rhizobiales	Mesorhizobium sp. WSM1497	GCA_001672455.2	ARP66567.1	DNA-binding response regulator	CP021070.1	5452940	5453605	-	A9K65_026865	4533656	68.0066	CtrA
Rhizobiales	Mesorhizobium sp. WSM1497	GCA_001672455.2	ARP67979.1	ATP-dependent Clp protease ATP-binding subunit ClpX	CP021070.1	4972943	4974217	-	A9K65_024420	4053659	60.8065	ClpX
Rhizobiales	Mesorhizobium sp. WSM1497	GCA_001672455.2	ARP63829.1	histidine phosphotransferase	CP021070.1	2263901	2264530	-	A9K65_010915	1344617	20.1698	ChpT
Rhizobiales	Mesorhizobium sp. WSM1497	GCA_001672455.2	ARP66676.1	DNA modification methylase	CP021070.1	5593230	5594363	-	A9K65_027500	4673946	70.111	CcrM
Rhizobiales	Mesorhizobium sp. WSM1497	GCA_001672455.2	ARP66555.1	PAS domain-containing sensor histidine kinase	CP021070.1	5436113	5438434	+	A9K65_026800	4516829	67.7542	DivL
Rhizobiales	Mesorhizobium sp. WSM1497	GCA_001672455.2	ARP65844.1	hybrid sensor histidine kinase/response regulator	CP021070.1	4637837	4640410	-	A9K65_022720	3718553	55.7798	CckA
Rhizobiales	Mesorhizobium sp. WSM1497	GCA_001672455.2	ARP62352.1	alkaline phosphatase	CP021070.1	502028	504583	-	A9K65_002320	6249236	93.741	DivL
Rhizobiales	Mesorhizobium sp. WSM1497	GCA_001672455.2	ARP61938.1	chromosomal replication initiation protein DnaA	CP021070.1	1	1548	+	A9K65_000005	5747209	86.2104	DnaA
Rhizobiales	Mesorhizobium sp. WSM1497	GCA_001672455.2	ARP62732.1	chromosome partitioning protein ParA	CP021070.1	929233	930033	+	A9K65_004530	9949	0.149239	ParA
Rhizobiales	Methylobacterium durans	GCA_003173715.1	AWN41002.1	chromosome partitioning protein ParB	CP029550.1	2473165	2474061	+	DK389_11295	20147	0.296787	ParB
Rhizobiales	Methylobacterium durans	GCA_003173715.1	AWN41368.1	GcrA cell cycle regulator	CP029550.1	2971143	2971673	+	DK389_13630	518125	7.63253	GcrA
Rhizobiales	Methylobacterium durans	GCA_003173715.1	AWN41456.1	ATP-dependent Clp protease ATP-binding subunit ClpX	CP029550.1	3074829	3076100	+	DK389_14190	621811	9.15994	ClpX
Rhizobiales	Methylobacterium durans	GCA_003173715.1	AWN41646.1	modification methylase	CP029550.1	3335422	3336603	-	DK389_15460	882404	12.9988	CcrM
Rhizobiales	Methylobacterium durans	GCA_003173715.1	AWN42149.1	hybrid sensor histidine kinase/response regulator	CP029550.1	4059674	4062358	+	DK389_18620	1606656	23.6678	CckA
Rhizobiales	Methylobacterium durans	GCA_003173715.1	AWN41201.1	DNA-binding response regulator	CP029550.1	2737233	2737910	-	DK389_12545	284215	4.18679	CtrA
Rhizobiales	Methylobacterium durans	GCA_003173715.1	AWN41001.1	chromosome partitioning protein ParA	CP029550.1	2472266	2473108	+	DK389_11290	19248	0.283544	ParA
Rhizobiales	Methylobacterium durans	GCA_003173715.1	AWN39426.1	chromosomal replication initiator protein DnaA	CP029550.1	295024	296517	-	DK389_01270	4630381	68.2104	DnaA
Rhizobiales	Methylobacterium durans	GCA_003173715.1	AWN41698.1	histidine phosphotransferase	CP029550.1	3396219	3396953	+	DK389_15760	943201	13.8944	ChpT
Rhizobiales	Methylobacterium durans	GCA_003173715.1	AWN41269.1	PAS domain-containing sensor histidine kinase	CP029550.1	2841981	2844356	-	DK389_13030	388963	5.72984	DivL
Rhizobiales	Methylobacterium sp. 17Sr1-43	GCA_003173735.1	AWN38825.1	chromosome partitioning protein ParB	CP029551.1	812219	813124	-	DK427_03625	5530956	99.8422	ParB
Rhizobiales	Methylobacterium sp. 17Sr1-43	GCA_003173735.1	AWN35508.1	modification methylase	CP029551.1	1562459	1563559	-	DK427_06995	741501	13.3852	CcrM
Rhizobiales	Methylobacterium sp. 17Sr1-43	GCA_003173735.1	AWN38738.1	chromosomal replication initiator protein DnaA	CP029551.1	4	1497	+	DK427_00005	4718741	85.1805	DnaA
Rhizobiales	Methylobacterium sp. 17Sr1-43	GCA_003173735.1	AWN36912.1	hybrid sensor histidine kinase/response regulator	CP029551.1	3234393	3237137	+	DK427_15185	2413435	43.5662	CckA
Rhizobiales	Methylobacterium sp. 17Sr1-43	GCA_003173735.1	AWN35026.1	DNA-binding response regulator	CP029551.1	909260	909937	-	DK427_04095	88302	1.59399	CtrA
Rhizobiales	Methylobacterium sp. 17Sr1-43	GCA_003173735.1	AWN34628.1	PAS domain-containing sensor histidine kinase	CP029551.1	416893	419241	+	DK427_01815	5135630	92.706	DivL
Rhizobiales	Methylobacterium sp. 17Sr1-43	GCA_003173735.1	AWN34530.1	histidine phosphotransferase	CP029551.1	284447	285169	-	DK427_01215	5003184	90.3152	ChpT
Rhizobiales	Methylobacterium sp. 17Sr1-43	GCA_003173735.1	AWN35243.1	ATP-dependent Clp protease ATP-binding subunit ClpX	CP029551.1	1220742	1222013	+	DK427_05415	399784	7.21671	ClpX
Rhizobiales	Methylobacterium sp. 17Sr1-43	GCA_003173735.1	AWN34944.1	chromosome partitioning protein ParA	CP029551.1	813207	814061	-	DK427_03630	5531944	99.8601	ParA
Rhizobiales	Methylobacterium sp. XJLW	GCA_003254375.1	AWV15896.1	chromosome partitioning protein ParA	CP016429.1	2342799	2343656	-	A3862_10580	145873	2.24487	ParA
Rhizobiales	Methylobacterium sp. XJLW	GCA_003254375.1	AWV14459.1	chromosomal replication initiation protein DnaA	CP016429.1	499964	501460	-	A3862_02230	4801111	73.8852	DnaA
Rhizobiales	Methylobacterium sp. XJLW	GCA_003254375.1	AWV16586.1	GcrA cell cycle regulator	CP016429.1	3213133	3213669	-	A3862_14635	1016207	15.6386	GcrA
Rhizobiales	Methylobacterium sp. XJLW	GCA_003254375.1	AWV18722.1	modification methylase	CP016429.1	5964065	5965171	+	A3862_26950	3767139	57.9732	CcrM
Rhizobiales	Methylobacterium sp. XJLW	GCA_003254375.1	AWV15028.1	ATP-dependent protease ATP-binding subunit ClpX	CP016429.1	1204247	1205518	-	A3862_05460	5505394	84.7235	ClpX
Rhizobiales	Methylobacterium sp. XJLW	GCA_003254375.1	AWV15152.1	DNA-binding response regulator	CP016429.1	1352835	1353512	-	A3862_06175	5653982	87.0101	CtrA
Rhizobiales	Methylobacterium sp. XJLW	GCA_003254375.1	AWV18701.1	two-component sensor histidine kinase	CP016429.1	5934341	5936935	-	A3862_26840	3737415	57.5157	DivL
Rhizobiales	Methylobacterium sp. XJLW	GCA_003254375.1	AWV19611.1	hybrid sensor histidine kinase/response regulator	CP016429.1	4310664	4313348	+	A3862_19650	2113738	32.5287	CckA
Rhizobiales	Methylobacterium sp. XJLW	GCA_003254375.1	AWV17313.1	PAS domain-containing sensor histidine kinase	CP016429.1	4159621	4161990	-	A3862_18940	1962695	30.2043	DivL
Rhizobiales	Methylobacterium sp. XJLW	GCA_003254375.1	AWV15976.1	histidine phosphotransferase	CP016429.1	2450601	2451323	+	A3862_11050	253675	3.90385	ChpT
Rhizobiales	Methylobacterium sp. XJLW	GCA_003254375.1	AWV19398.1	chromosome partitioning protein ParB	CP016429.1	2341844	2342737	-	A3862_10575	144918	2.23017	ParB
Rhizobiales	Methylocystis bryophila	GCA_002117405.1	ARN82531.1	chromosomal replication initiation protein DnaA	CP019948.1	3585934	3587448	+	B1812_17175	879	0.0193913	DnaA
Rhizobiales	Methylocystis bryophila	GCA_002117405.1	ARN81319.1	chromosome partitioning protein ParB	CP019948.1	2089653	2090534	-	B1812_09775	3037548	67.0104	ParB
Rhizobiales	Methylocystis bryophila	GCA_002117405.1	ARN80709.1	GcrA cell cycle regulator	CP019948.1	1299779	1300306	+	B1812_06070	2247674	49.5852	GcrA
Rhizobiales	Methylocystis bryophila	GCA_002117405.1	ARN80551.1	DNA-binding response regulator	CP019948.1	1117239	1117916	+	B1812_05150	2065134	45.5583	CtrA
Rhizobiales	Methylocystis bryophila	GCA_002117405.1	ARN79993.1	hypothetical protein	CP019948.1	371400	373868	+	B1812_01645	1319295	29.1046	DivL
Rhizobiales	Methylocystis bryophila	GCA_002117405.1	ARN80174.1	histidine phosphotransferase	CP019948.1	606184	606870	-	B1812_02705	1554079	34.2841	ChpT
Rhizobiales	Methylocystis bryophila	GCA_002117405.1	ARN81936.1	modification methylase	CP019948.1	2853135	2854307	-	B1812_13520	3801030	83.8533	CcrM
Rhizobiales	Methylocystis bryophila	GCA_002117405.1	ARN81899.1	hybrid sensor histidine kinase/response regulator	CP019948.1	2808967	2811486	-	B1812_13300	3756862	82.879	CckA
Rhizobiales	Methylocystis bryophila	GCA_002117405.1	ARN83533.1	chromosome partitioning protein ParA	CP019948.1	2090605	2091426	-	B1812_09780	3038500	67.0314	ParA
Rhizobiales	Methylocystis bryophila	GCA_002117405.1	ARN81251.1	ATP-dependent protease ATP-binding subunit ClpX	CP019948.1	1991880	1993145	-	B1812_09330	2939775	64.8535	ClpX
Rhizobiales	Methylosinus trichosporium OB3b	GCA_002752655.1	ATQ68654.1	chromosome partitioning protein ParB	CP023737.1	2659577	2660446	-	CQW49_12750	4500068	99.8056	ParB
Rhizobiales	Methylosinus trichosporium OB3b	GCA_002752655.1	ATQ67139.1	DNA-binding response regulator	CP023737.1	836796	837470	-	CQW49_03965	2677287	59.3787	CtrA
Rhizobiales	Methylosinus trichosporium OB3b	GCA_002752655.1	ATQ68925.1	two-component sensor histidine kinase	CP023737.1	3005800	3008346	+	CQW49_14305	337459	7.4844	DivL
Rhizobiales	Methylosinus trichosporium OB3b	GCA_002752655.1	ATQ68711.1	GcrA cell cycle regulator	CP023737.1	2734920	2735477	+	CQW49_13065	66579	1.47664	GcrA
Rhizobiales	Methylosinus trichosporium OB3b	GCA_002752655.1	ATQ67934.1	histidine phosphotransferase	CP023737.1	1766693	1767379	+	CQW49_08560	3607184	80.0026	ChpT
Rhizobiales	Methylosinus trichosporium OB3b	GCA_002752655.1	ATQ69234.1	ATP-dependent Clp protease ATP-binding subunit ClpX	CP023737.1	3369336	3370598	-	CQW49_16110	700995	15.5472	ClpX
Rhizobiales	Methylosinus trichosporium OB3b	GCA_002752655.1	ATQ69982.1	PAS domain-containing sensor histidine kinase	CP023737.1	4315549	4317801	-	CQW49_20410	1647208	36.5329	DivL
Rhizobiales	Methylosinus trichosporium OB3b	GCA_002752655.1	ATQ68655.1	ParA family protein	CP023737.1	2660480	2661265	-	CQW49_12755	4500971	99.8257	ParA
Rhizobiales	Methylosinus trichosporium OB3b	GCA_002752655.1	ATQ68032.1	site-specific DNA-methyltransferase	CP023737.1	1873517	1874689	-	CQW49_09130	3714008	82.3718	CcrM
Rhizobiales	Methylosinus trichosporium OB3b	GCA_002752655.1	ATQ66709.1	PAS domain-containing sensor histidine kinase	CP023737.1	297951	300470	+	CQW49_01465	2138442	47.4278	CckA
Rhizobiales	Methylosinus trichosporium OB3b	GCA_002752655.1	ATQ66456.1	chromosomal replication initiator protein DnaA	CP023737.1	1	1494	+	CQW49_00005	1840492	40.8197	DnaA
Rhizobiales	Methylovirgula ligni	GCA_004135935.1	QAY97197.1	chromosome partitioning protein ParB	CP025086.1	1034494	1035357	-	CWB41_05005	3275798	99.3091	ParB
Rhizobiales	Methylovirgula ligni	GCA_004135935.1	QAY95168.1	chromosome partitioning protein ParA	CP025086.1	1035401	1036258	-	CWB41_05010	3276705	99.3366	ParA
Rhizobiales	Methylovirgula ligni	GCA_004135935.1	QAY95419.1	GcrA cell cycle regulator	CP025086.1	1320727	1321236	-	CWB41_06460	263443	7.98654	GcrA
Rhizobiales	Methylovirgula ligni	GCA_004135935.1	QAY96849.1	DNA-binding response regulator	CP025086.1	3046274	3046993	-	CWB41_14815	1988990	60.2982	CtrA
Rhizobiales	Methylovirgula ligni	GCA_004135935.1	QAY94485.1	ATP-dependent Clp protease ATP-binding subunit ClpX	CP025086.1	211357	212622	-	CWB41_00970	2452661	74.3549	ClpX
Rhizobiales	Methylovirgula ligni	GCA_004135935.1	QAY94507.1	chromosomal replication initiator protein DnaA	CP025086.1	242507	244015	+	CWB41_01115	2483811	75.2992	DnaA
Rhizobiales	Methylovirgula ligni	GCA_004135935.1	QAY97300.1	two-component sensor histidine kinase	CP025086.1	1930190	1932601	-	CWB41_09290	872906	26.463	DivL
Rhizobiales	Methylovirgula ligni	GCA_004135935.1	QAY95968.1	modification methylase	CP025086.1	2016403	2017617	+	CWB41_09710	959119	29.0767	CcrM
Rhizobiales	Methylovirgula ligni	GCA_004135935.1	QAY96168.1	hybrid sensor histidine kinase/response regulator	CP025086.1	2242968	2245580	+	CWB41_10850	1185684	35.9452	CckA
Rhizobiales	Methylovirgula ligni	GCA_004135935.1	QAY96842.1	PAS domain-containing sensor histidine kinase	CP025086.1	3031107	3033500	+	CWB41_14765	1973823	59.8384	DivL
Rhizobiales	Methylovirgula ligni	GCA_004135935.1	QAY95770.1	histidine phosphotransferase	CP025086.1	1751744	1752415	-	CWB41_08485	694460	21.0533	ChpT
Rhizobiales	Neorhizobium galegae bv. officinalis bv. officinalis str. HAMBI 1141	GCA_000731295.1	CDN55105.1	Histidine phosphotransferase ChpT	HG938355.1	2716918	2717565	-	RG1141_CH27680	3253263	70.7359	ChpT
Rhizobiales	Neorhizobium galegae bv. officinalis bv. officinalis str. HAMBI 1141	GCA_000731295.1	CDN53243.1	Putative two-component sensor histidine kinase with a ATP-binding domain (C-term)	HG938355.1	841547	843898	-	RG1141_CH08830	1377892	29.9596	DivL
Rhizobiales	Neorhizobium galegae bv. officinalis bv. officinalis str. HAMBI 1141	GCA_000731295.1	CDN54028.1	Cell cycle control histidine kinase CckA	HG938355.1	1623775	1626387	+	RG1141_CH16850	2160120	46.9676	CckA
Rhizobiales	Neorhizobium galegae bv. officinalis bv. officinalis str. HAMBI 1141	GCA_000731295.1	CDN53231.1	Two component transcriptional regulator%2C winged helix family	HG938355.1	826498	827169	+	RG1141_CH08710	1362843	29.6324	CtrA
Rhizobiales	Neorhizobium galegae bv. officinalis bv. officinalis str. HAMBI 1141	GCA_000731295.1	CDN56334.1	Sensor protein DivL	HG938355.1	4093352	4095946	-	RG1141_CH40140	30531	0.663838	DivL
Rhizobiales	Neorhizobium galegae bv. officinalis bv. officinalis str. HAMBI 1141	GCA_000731295.1	CDN52488.1	GcrA cell cycle regulator	HG938355.1	119705	120241	-	RG1141_CH01220	656050	14.2645	GcrA
Rhizobiales	Neorhizobium galegae bv. officinalis bv. officinalis str. HAMBI 1141	GCA_000731295.1	CDN53007.1	Modification methylase BabI	HG938355.1	634820	635950	+	RG1141_CH06460	1171165	25.4647	CcrM
Rhizobiales	Neorhizobium galegae bv. officinalis bv. officinalis str. HAMBI 1141	GCA_000731295.1	CDN52369.1	Chromosomal replication initiator protein DnaA	HG938355.1	100	1566	+	RG1141_CH00010	536445	11.664	DnaA
Rhizobiales	Neorhizobium galegae bv. officinalis bv. officinalis str. HAMBI 1141	GCA_000731295.1	CDN56298.1	Chromosome segregation DNA-binding protein	HG938355.1	4054141	4055022	-	RG1141_CH39780	4590486	99.8113	ParB
Rhizobiales	Neorhizobium galegae bv. officinalis bv. officinalis str. HAMBI 1141	GCA_000731295.1	CDN56299.1	Chromosome partitioning protein ParA	HG938355.1	4055046	4055837	-	RG1141_CH39790	4591391	99.8309	ParA
Rhizobiales	Neorhizobium galegae bv. officinalis bv. officinalis str. HAMBI 1141	GCA_000731295.1	CDN53508.1	ATP-dependent Clp protease ATP-binding subunit ClpX	HG938355.1	1093748	1095025	+	RG1141_CH11500	1630093	35.4432	ClpX
Rhizobiales	Neorhizobium sp. NCHU2750	GCA_003597675.1	AYC99504.1	GcrA cell cycle regulator	CP030827.1	105485	106018	-	NCHU2750_01020	517463	11.98	GcrA
Rhizobiales	Neorhizobium sp. NCHU2750	GCA_003597675.1	AYD03100.1	chromosome partitioning protein	CP030827.1	3898780	3899661	-	NCHU2750_37150	4310758	99.8	ParB
Rhizobiales	Neorhizobium sp. NCHU2750	GCA_003597675.1	AYC99405.1	chromosomal replication initiator protein	CP030827.1	1	1569	+	NCHU2750_00010	411979	9.53788	DnaA
Rhizobiales	Neorhizobium sp. NCHU2750	GCA_003597675.1	AYD00244.1	two-component system response regulator	CP030827.1	855769	856440	+	NCHU2750_08500	1267747	29.3501	CtrA
Rhizobiales	Neorhizobium sp. NCHU2750	GCA_003597675.1	AYD03136.1	alkaline phosphatase	CP030827.1	3938294	3940858	-	NCHU2750_37510	30876	0.714822	DivL
Rhizobiales	Neorhizobium sp. NCHU2750	GCA_003597675.1	AYC99938.1	cell cycle regulated site-specific DNA-methyltransferase protein	CP030827.1	579012	580142	+	NCHU2750_05410	990990	22.9428	CcrM
Rhizobiales	Neorhizobium sp. NCHU2750	GCA_003597675.1	AYD03101.1	chromosome partitioning protein	CP030827.1	3899686	3900480	-	NCHU2750_37160	4311664	99.821	ParA
Rhizobiales	Neorhizobium sp. NCHU2750	GCA_003597675.1	AYD01989.1	histidine phosphotransferase	CP030827.1	2683055	2683702	-	NCHU2750_26040	3095033	71.6543	ChpT
Rhizobiales	Neorhizobium sp. NCHU2750	GCA_003597675.1	AYD01138.1	histidine kinase	CP030827.1	1797567	1800182	+	NCHU2750_17500	2209545	51.154	CckA
Rhizobiales	Neorhizobium sp. NCHU2750	GCA_003597675.1	AYD00256.1	two-component system sensor histidine kinase	CP030827.1	871969	874335	-	NCHU2750_08620	1283947	29.7252	DivL
Rhizobiales	Neorhizobium sp. NCHU2750	GCA_003597675.1	AYD00539.1	ATP-dependent Clp protease ATP-binding subunit	CP030827.1	1159932	1161209	+	NCHU2750_11460	1571910	36.3919	ClpX
Rhizobiales	Neorhizobium sp. SOG26	GCA_003491345.1	AXV14776.1	DNA-binding response regulator	CP025512.1	628923	629594	+	CYG48_03105	944191	27.9875	CtrA
Rhizobiales	Neorhizobium sp. SOG26	GCA_003491345.1	AXV17240.1	PAS domain-containing sensor histidine kinase	CP025512.1	642846	645212	-	CYG48_03160	958114	28.4002	DivL
Rhizobiales	Neorhizobium sp. SOG26	GCA_003491345.1	AXV14242.1	chromosomal replication initiator protein DnaA	CP025512.1	1	1569	+	CYG48_00005	315269	9.34512	DnaA
Rhizobiales	Neorhizobium sp. SOG26	GCA_003491345.1	AXV16878.1	chromosome partitioning protein ParB	CP025512.1	3049695	3050576	-	CYG48_14985	3364963	99.7434	ParB
Rhizobiales	Neorhizobium sp. SOG26	GCA_003491345.1	AXV16040.1	histidine phosphotransferase	CP025512.1	2062448	2063113	-	CYG48_10260	2377716	70.4797	ChpT
Rhizobiales	Neorhizobium sp. SOG26	GCA_003491345.1	AXV14641.1	modification methylase	CP025512.1	487133	488263	+	CYG48_02300	802401	23.7846	CcrM
Rhizobiales	Neorhizobium sp. SOG26	GCA_003491345.1	AXV16879.1	chromosome partitioning protein ParA	CP025512.1	3050604	3051395	-	CYG48_14990	3365872	99.7703	ParA
Rhizobiales	Neorhizobium sp. SOG26	GCA_003491345.1	AXV16911.1	alkaline phosphatase	CP025512.1	3088649	3091228	-	CYG48_15160	30297	0.898056	DivL
Rhizobiales	Neorhizobium sp. SOG26	GCA_003491345.1	AXV15583.1	hybrid sensor histidine kinase/response regulator	CP025512.1	1526470	1529100	-	CYG48_07660	1841738	54.5923	CckA
Rhizobiales	Neorhizobium sp. SOG26	GCA_003491345.1	AXV14986.1	ATP-dependent Clp protease ATP-binding subunit ClpX	CP025512.1	868363	869640	+	CYG48_04305	1183631	35.0849	ClpX
Rhizobiales	Ochrobactrum anthropi	GCA_000742955.1	AIK43913.1	hypothetical protein	CP008820.1	1109849	1110478	-	DR92_1056	694076	25.6263	ChpT
Rhizobiales	Ochrobactrum anthropi	GCA_000742955.1	AIK45140.1	hypothetical protein	CP008820.1	2223444	2224136	-	DR92_2155	1807671	66.7418	CtrA
Rhizobiales	Ochrobactrum anthropi	GCA_000742955.1	AIK43959.1	sensory box protein	CP008820.1	1683746	1686319	+	DR92_1618	1267973	46.8154	CckA
Rhizobiales	Ochrobactrum anthropi	GCA_000742955.1	AIK44363.1	ParB/RepB/Spo0J family partition domain protein	CP008820.1	426450	427331	+	DR92_399	10677	0.39421	ParB
Rhizobiales	Ochrobactrum anthropi	GCA_000742955.1	AIK44310.1	DNA methylase family protein	CP008820.1	2400839	2401972	-	DR92_2336	1985066	73.2915	CcrM
Rhizobiales	Ochrobactrum anthropi	GCA_000742955.1	AIK44851.1	ATP-dependent Clp protease%2C ATP-binding subunit ClpX	CP008820.1	1777556	1778830	-	DR92_1709	1361783	50.279	ClpX
Rhizobiales	Ochrobactrum anthropi	GCA_000742955.1	AIK44172.1	sensory box protein	CP008820.1	2207903	2210257	+	DR92_2144	1792130	66.168	DivL
Rhizobiales	Ochrobactrum anthropi	GCA_000742955.1	AIK42920.1	gcrA cell cycle regulator family protein	CP008820.1	2614948	2615487	+	DR92_2548	2199175	81.1967	GcrA
Rhizobiales	Ochrobactrum anthropi	GCA_000742955.1	AIK42881.1	cobQ/CobB/MinD/ParA nucleotide binding domain protein	CP008820.1	425608	426405	+	DR92_398	9835	0.363122	ParA
Rhizobiales	Ochrobactrum anthropi	GCA_000742955.1	AIK44168.1	sensory box protein	CP008820.1	386079	388655	-	DR92_358	2678760	98.9037	DivL
Rhizobiales	Ochrobactrum anthropi	GCA_000742955.1	AIK44764.1	chromosomal replication initiator protein DnaA	CP008820.1	273895	275358	-	DR92_247	2566576	94.7617	DnaA
Rhizobiales	Ochrobactrum pseudogrignonense	GCA_001652485.1	ANG98374.1	hybrid sensor histidine kinase/response regulator	CP015775.1	997513	1000083	+	A8A54_04800	1201406	30.4111	CckA
Rhizobiales	Ochrobactrum pseudogrignonense	GCA_001652485.1	ANG95226.1	GcrA cell cycle regulator	CP015775.1	268999	269553	-	A8A54_01225	472892	11.9703	GcrA
Rhizobiales	Ochrobactrum pseudogrignonense	GCA_001652485.1	ANG95925.1	ATP-dependent protease ATP-binding subunit ClpX	CP015775.1	1077824	1079098	-	A8A54_05155	1281717	32.444	ClpX
Rhizobiales	Ochrobactrum pseudogrignonense	GCA_001652485.1	ANG98098.1	chromosome partitioning protein ParB	CP015775.1	3735302	3736177	-	A8A54_17400	3939195	99.7124	ParB
Rhizobiales	Ochrobactrum pseudogrignonense	GCA_001652485.1	ANG96355.1	histidine phosphotransferase	CP015775.1	1564517	1565146	+	A8A54_07520	1768410	44.7636	ChpT
Rhizobiales	Ochrobactrum pseudogrignonense	GCA_001652485.1	ANG98099.1	chromosome partitioning protein ParA	CP015775.1	3736248	3737045	-	A8A54_17405	3940141	99.7364	ParA
Rhizobiales	Ochrobactrum pseudogrignonense	GCA_001652485.1	ANG95423.1	modification methylase	CP015775.1	482029	483162	+	A8A54_02290	685922	17.3627	CcrM
Rhizobiales	Ochrobactrum pseudogrignonense	GCA_001652485.1	ANG95489.1	DNA-binding response regulator	CP015775.1	554000	554689	+	A8A54_02655	757893	19.1845	CtrA
Rhizobiales	Ochrobactrum pseudogrignonense	GCA_001652485.1	ANG95500.1	PAS domain-containing sensor histidine kinase	CP015775.1	568089	570443	-	A8A54_02710	771982	19.5411	DivL
Rhizobiales	Ochrobactrum pseudogrignonense	GCA_001652485.1	ANG98606.1	chromosomal replication initiation protein DnaA	CP015775.1	3897018	3898592	+	A8A54_18195	150355	3.80592	DnaA
Rhizobiales	Ochrobactrum pseudogrignonense	GCA_001652485.1	ANG98599.1	alkaline phosphatase	CP015775.1	3778098	3780662	+	A8A54_17625	31435	0.795711	DivL
Rhizobiales	Pleomorphomonas sp. SM30	GCA_003966995.1	BBE73395.1	chromosome-partitioning protein ParB	AP017626.1	3298346	3299233	+	OHA_1_03006	8784	0.181435	ParB
Rhizobiales	Pleomorphomonas sp. SM30	GCA_003966995.1	BBE70764.1	ATP-dependent Clp protease ATP-binding subunit ClpX	AP017626.1	351778	353046	+	OHA_1_00329	1903608	39.3194	ClpX
Rhizobiales	Pleomorphomonas sp. SM30	GCA_003966995.1	BBE73718.1	GcrA cell cycle regulator	AP017626.1	3632230	3632790	-	OHA_1_03334	342668	7.07788	GcrA
Rhizobiales	Pleomorphomonas sp. SM30	GCA_003966995.1	BBE73394.1	chromosome partitioning protein ParA	AP017626.1	3297489	3298325	+	OHA_1_03005	7927	0.163734	ParA
Rhizobiales	Pleomorphomonas sp. SM30	GCA_003966995.1	BBE72654.1	hypothetical protein	AP017626.1	2437833	2438483	+	OHA_1_02252	3989663	82.4074	ChpT
Rhizobiales	Pleomorphomonas sp. SM30	GCA_003966995.1	BBE72204.1	modification methylase DpnIIB	AP017626.1	1932576	1933757	-	OHA_1_01793	3484406	71.9712	CcrM
Rhizobiales	Pleomorphomonas sp. SM30	GCA_003966995.1	BBE73350.1	sensor protein DivL	AP017626.1	3247285	3249786	-	OHA_1_02960	4799115	99.1268	DivL
Rhizobiales	Pleomorphomonas sp. SM30	GCA_003966995.1	BBE72038.1	transcriptional regulatory protein QseB	AP017626.1	1762022	1762690	-	OHA_1_01625	3313852	68.4483	CtrA
Rhizobiales	Pleomorphomonas sp. SM30	GCA_003966995.1	BBE72024.1	non-motile and phage-resistance protein	AP017626.1	1743488	1745929	+	OHA_1_01611	3295318	68.0655	DivL
Rhizobiales	Pleomorphomonas sp. SM30	GCA_003966995.1	BBE73653.1	chromosomal replication initiator protein DnaA	AP017626.1	3569852	3571357	-	OHA_1_03267	280290	5.78945	DnaA
Rhizobiales	Pseudorhodoplanes sinuspersici	GCA_002119765.1	ARP98655.1	GcrA cell cycle regulator	CP021112.1	1173410	1173910	+	CAK95_05845	5512540	92.3124	GcrA
Rhizobiales	Pseudorhodoplanes sinuspersici	GCA_002119765.1	ARQ00253.1	histidine phosphotransferase	CP021112.1	3128276	3128920	+	CAK95_15120	1495791	25.0483	ChpT
Rhizobiales	Pseudorhodoplanes sinuspersici	GCA_002119765.1	ARP99592.1	modification methylase	CP021112.1	2316839	2317966	+	CAK95_11220	684354	11.4601	CcrM
Rhizobiales	Pseudorhodoplanes sinuspersici	GCA_002119765.1	ARQ00820.1	hybrid sensor histidine kinase/response regulator	CP021112.1	3778562	3781120	+	CAK95_18290	2146077	35.938	CckA
Rhizobiales	Pseudorhodoplanes sinuspersici	GCA_002119765.1	ARQ00979.1	PAS domain-containing sensor histidine kinase	CP021112.1	3952503	3954791	-	CAK95_19180	2320018	38.8508	DivL
Rhizobiales	Pseudorhodoplanes sinuspersici	GCA_002119765.1	ARQ03061.1	DNA-binding response regulator	CP021112.1	3936715	3937383	+	CAK95_19120	2304230	38.5864	CtrA
Rhizobiales	Pseudorhodoplanes sinuspersici	GCA_002119765.1	ARP99053.1	chromosome partitioning protein ParB	CP021112.1	1653359	1654237	+	CAK95_08135	20874	0.349554	ParB
Rhizobiales	Pseudorhodoplanes sinuspersici	GCA_002119765.1	ARP99553.1	two-component sensor histidine kinase	CP021112.1	2275254	2277752	-	CAK95_11010	642769	10.7637	DivL
Rhizobiales	Pseudorhodoplanes sinuspersici	GCA_002119765.1	ARP99052.1	chromosome partitioning protein ParA	CP021112.1	1652429	1653292	+	CAK95_08130	19944	0.33398	ParA
Rhizobiales	Pseudorhodoplanes sinuspersici	GCA_002119765.1	ARP99277.1	chromosomal replication initiation protein DnaA	CP021112.1	1935949	1937397	-	CAK95_09435	303464	5.08177	DnaA
Rhizobiales	Pseudorhodoplanes sinuspersici	GCA_002119765.1	ARQ01596.1	ATP-dependent protease ATP-binding subunit ClpX	CP021112.1	4657412	4658686	+	CAK95_22675	3024927	50.6551	ClpX
Rhizobiales	Rhizobium jaguaris	GCA_003627755.1	AYG60160.1	histidine phosphotransferase	CP032694.1	3289867	3290514	-	CCGE525_16045	3372284	73.7061	ChpT
Rhizobiales	Rhizobium jaguaris	GCA_003627755.1	AYG58384.1	site-specific DNA-methyltransferase	CP032694.1	1200890	1202020	+	CCGE525_05830	1283307	28.0485	CcrM
Rhizobiales	Rhizobium jaguaris	GCA_003627755.1	AYG57868.1	chromosomal replication initiator protein DnaA	CP032694.1	574889	576442	+	CCGE525_02845	657306	14.3664	DnaA
Rhizobiales	Rhizobium jaguaris	GCA_003627755.1	AYG58527.1	DNA-binding response regulator	CP032694.1	1361850	1362521	+	CCGE525_06670	1444267	31.5665	CtrA
Rhizobiales	Rhizobium jaguaris	GCA_003627755.1	AYG59318.1	PAS domain-containing sensor histidine kinase	CP032694.1	2310178	2312796	-	CCGE525_11345	2392595	52.2936	CckA
Rhizobiales	Rhizobium jaguaris	GCA_003627755.1	AYG58015.1	GcrA cell cycle regulator	CP032694.1	745763	746287	-	CCGE525_03685	828180	18.101	GcrA
Rhizobiales	Rhizobium jaguaris	GCA_003627755.1	AYG58538.1	PAS domain S-box protein	CP032694.1	1377157	1379472	-	CCGE525_06730	1459574	31.9011	DivL
Rhizobiales	Rhizobium jaguaris	GCA_003627755.1	AYG61209.1	ParB/RepB/Spo0J family partition protein	CP032694.1	4566582	4567466	-	CCGE525_22110	73684	1.61047	ParB
Rhizobiales	Rhizobium jaguaris	GCA_003627755.1	AYG58763.1	ATP-dependent Clp protease ATP-binding subunit ClpX	CP032694.1	1644930	1646207	+	CCGE525_08025	1727347	37.7536	ClpX
Rhizobiales	Rhizobium jaguaris	GCA_003627755.1	AYG61210.1	ParA family protein	CP032694.1	4567499	4568296	-	CCGE525_22115	74601	1.63051	ParA
Rhizobiales	Rhizobium jaguaris	GCA_003627755.1	AYG57425.1	PAS domain-containing protein	CP032694.1	36506	39091	-	CCGE525_00175	118923	2.59923	DivL
Rhizobiales	Rhizobium leguminosarum bv. trifolii WSM2304	GCA_000021345.1	ACI53474.1	GcrA cell cycle regulator	CP001191.1	173381	173914	-	Rleg2_0174	625468	13.7831	GcrA
Rhizobiales	Rhizobium leguminosarum bv. trifolii WSM2304	GCA_000021345.1	ACI57189.1	parB-like partition protein	CP001191.1	4077102	4077983	-	Rleg2_3927	4529189	99.807	ParB
Rhizobiales	Rhizobium leguminosarum bv. trifolii WSM2304	GCA_000021345.1	ACI54223.1	multi-sensor signal transduction histidine kinase	CP001191.1	946063	948372	-	Rleg2_0929	1398150	30.8102	DivL
Rhizobiales	Rhizobium leguminosarum bv. trifolii WSM2304	GCA_000021345.1	ACI54211.1	two component transcriptional regulator%2C winged helix family	CP001191.1	930915	931586	+	Rleg2_0917	1383002	30.4764	CtrA
Rhizobiales	Rhizobium leguminosarum bv. trifolii WSM2304	GCA_000021345.1	ACI55246.1	multi-sensor hybrid histidine kinase	CP001191.1	2007704	2010307	-	Rleg2_1961	2459791	54.2049	CckA
Rhizobiales	Rhizobium leguminosarum bv. trifolii WSM2304	GCA_000021345.1	ACI56348.1	conserved hypothetical protein	CP001191.1	3142571	3143221	-	Rleg2_3081	3594658	79.2133	ChpT
Rhizobiales	Rhizobium leguminosarum bv. trifolii WSM2304	GCA_000021345.1	ACI53946.1	DNA methylase N-4/N-6 domain protein	CP001191.1	671098	672240	+	Rleg2_0649	1123185	24.7509	CcrM
Rhizobiales	Rhizobium leguminosarum bv. trifolii WSM2304	GCA_000021345.1	ACI57190.1	Cobyrinic acid ac-diamide synthase	CP001191.1	4078011	4078805	-	Rleg2_3928	4530098	99.827	ParA
Rhizobiales	Rhizobium leguminosarum bv. trifolii WSM2304	GCA_000021345.1	ACI57225.1	PAS/PAC sensor signal transduction histidine kinase	CP001191.1	4116210	4118795	-	Rleg2_3963	30349	0.668782	DivL
Rhizobiales	Rhizobium leguminosarum bv. trifolii WSM2304	GCA_000021345.1	ACI53304.1	chromosomal replication initiator protein DnaA	CP001191.1	620	2170	+	Rleg2_0001	452707	9.97603	DnaA
Rhizobiales	Rhizobium leguminosarum bv. trifolii WSM2304	GCA_000021345.1	ACI54542.1	ATP-dependent Clp protease%2C ATP-binding subunit ClpX	CP001191.1	1262984	1264261	+	Rleg2_1248	1715071	37.794	ClpX
Rhizobiales	Rhizobium sp. NT-26	GCA_000967425.1	CCF17806.1	putative DNA-binding regulatory protein%3B putative GcrA-like cell cycle regulator	FO082820.1	80239	80766	-	NT26_0080	543804	12.8264	GcrA
Rhizobiales	Rhizobium sp. NT-26	GCA_000967425.1	CCF18265.1	adenine DNA methyltransferase	FO082820.1	554933	556063	+	NT26_0541	1018498	24.0227	CcrM
Rhizobiales	Rhizobium sp. NT-26	GCA_000967425.1	CCF18651.1	Sensor protein	FO082820.1	934209	936548	-	NT26_0927	1397774	32.9685	DivL
Rhizobiales	Rhizobium sp. NT-26	GCA_000967425.1	CCF20282.1	conserved protein of unknown function	FO082820.1	2483458	2484105	-	NT26_2558	2947023	69.5097	ChpT
Rhizobiales	Rhizobium sp. NT-26	GCA_000967425.1	CCF18978.1	ATP-dependent Clp protease ATP-binding subunit clpX	FO082820.1	1245102	1246379	+	NT26_1254	1708667	40.3013	ClpX
Rhizobiales	Rhizobium sp. NT-26	GCA_000967425.1	CCF18640.1	putative Two-component transcriptional regulator	FO082820.1	920534	921205	+	NT26_0916	1384099	32.6459	CtrA
Rhizobiales	Rhizobium sp. NT-26	GCA_000967425.1	CCF21543.1	chromosome partitioning protein	FO082820.1	3767550	3768425	-	NT26_3821	4231115	99.7968	ParB
Rhizobiales	Rhizobium sp. NT-26	GCA_000967425.1	CCF21580.1	Sensor protein	FO082820.1	3805801	3808245	-	NT26_3858	29635	0.698983	DivL
Rhizobiales	Rhizobium sp. NT-26	GCA_000967425.1	CCF19622.1	Sensor protein	FO082820.1	1837054	1839651	-	NT26_1898	2300619	54.2633	CckA
Rhizobiales	Rhizobium sp. NT-26	GCA_000967425.1	CCF21544.1	chromosome partitioning protein	FO082820.1	3768440	3769225	-	NT26_3822	4232005	99.8178	ParA
Rhizobiales	Rhizobium sp. NT-26	GCA_000967425.1	CCF17728.1	Chromosomal replication initiator protein dnaA	FO082820.1	558	2120	+	NT26_0001	464123	10.947	DnaA
Rhizobiales	Rhodobiaceae bacterium	GCA_003330885.1	AWZ02611.1	chromosome partitioning protein ParA	CP030277.1	3117824	3118723	-	RHODOSMS8_03101	3845790	99.5737	ParA
Rhizobiales	Rhodobiaceae bacterium	GCA_003330885.1	AWZ00070.1	transcriptional regulatory protein PhoP	CP030277.1	502944	503618	+	RHODOSMS8_00516	1230910	31.8702	CtrA
Rhizobiales	Rhodobiaceae bacterium	GCA_003330885.1	AWZ02757.1	chromosomal replication initiator protein DnaA	CP030277.1	3267539	3269107	+	RHODOSMS8_03247	133250	3.45006	DnaA
Rhizobiales	Rhodobiaceae bacterium	GCA_003330885.1	AWZ03162.1	GcrA cell cycle regulator	CP030277.1	3735338	3735844	-	RHODOSMS8_03662	601049	15.5621	GcrA
Rhizobiales	Rhodobiaceae bacterium	GCA_003330885.1	AWZ01680.1	hypothetical protein	CP030277.1	2163896	2164543	-	RHODOSMS8_02151	2891862	74.875	ChpT
Rhizobiales	Rhodobiaceae bacterium	GCA_003330885.1	AWZ02835.1	sensor protein DivL	CP030277.1	3363107	3365644	+	RHODOSMS8_03326	228818	5.92447	DivL
Rhizobiales	Rhodobiaceae bacterium	GCA_003330885.1	AWZ02610.1	chromosome-partitioning protein ParB	CP030277.1	3116697	3117593	-	RHODOSMS8_03100	3844663	99.5445	ParB
Rhizobiales	Rhodobiaceae bacterium	GCA_003330885.1	AWZ00390.1	ATP-dependent Clp protease ATP-binding subunit ClpX	CP030277.1	852909	854183	+	RHODOSMS8_00838	1580875	40.9314	ClpX
Rhizobiales	Rhodobiaceae bacterium	GCA_003330885.1	AWY99806.1	modification methylase DpnIIB	CP030277.1	237195	238277	-	RHODOSMS8_00249	965161	24.9896	CcrM
Rhizobiales	Rhodobiaceae bacterium	GCA_003330885.1	AWZ01138.1	sensor kinase CckA	CP030277.1	1605665	1608268	-	RHODOSMS8_01603	2333631	60.4215	CckA
Rhizobiales	Rhodoplanes sp. Z2-YC6860	GCA_001579845.1	AMN41406.1	Two-component response regulator	CP007440.1	3460592	3461260	+	RHPLAN_29700	3460933	42.238	CtrA
Rhizobiales	Rhodoplanes sp. Z2-YC6860	GCA_001579845.1	AMN43277.1	multi-sensor hybrid histidine kinase	CP007440.1	5573283	5575823	-	RHPLAN_48530	5573624	68.0217	CckA
Rhizobiales	Rhodoplanes sp. Z2-YC6860	GCA_001579845.1	AMN40943.1	modification methylase CcrMI	CP007440.1	2890880	2892022	-	RHPLAN_25050	2891221	35.2851	CcrM
Rhizobiales	Rhodoplanes sp. Z2-YC6860	GCA_001579845.1	AMN38811.1	PAS/PAC sensor signal transduction histidine kinase	CP007440.1	389374	391887	+	RHPLAN_03460	389715	4.75617	DivL
Rhizobiales	Rhodoplanes sp. Z2-YC6860	GCA_001579845.1	AMN44334.1	hypothetical protein	CP007440.1	6830751	6831392	-	RHPLAN_59230	6831092	83.3681	ChpT
Rhizobiales	Rhodoplanes sp. Z2-YC6860	GCA_001579845.1	AMN38466.1	chromosomal replication initiation protein	CP007440.1	772	2202	+	RHPLAN_00010	1113	0.0135833	DnaA
Rhizobiales	Rhodoplanes sp. Z2-YC6860	GCA_001579845.1	AMN41450.1	Two-component sensor histidine kinase PleC	CP007440.1	3514937	3517261	-	RHPLAN_30140	3515278	42.9012	DivL
Rhizobiales	Rhodoplanes sp. Z2-YC6860	GCA_001579845.1	AMN38702.1	cobyrinic acid a%2Cc-diamide synthase	CP007440.1	271852	272808	-	RHPLAN_02370	272193	3.3219	ParA
Rhizobiales	Rhodoplanes sp. Z2-YC6860	GCA_001579845.1	AMN44876.1	cell cycle regulator GcrA	CP007440.1	7472906	7473406	+	RHPLAN_64700	7473247	91.2051	GcrA
Rhizobiales	Rhodoplanes sp. Z2-YC6860	GCA_001579845.1	AMN42276.1	ATP-dependent Clp protease ATP-binding subunit ClpX	CP007440.1	4464348	4465616	+	RHPLAN_38440	4464689	54.488	ClpX
Rhizobiales	Rhodoplanes sp. Z2-YC6860	GCA_001579845.1	AMN38701.1	parB-like partition protein	CP007440.1	270832	271722	-	RHPLAN_02360	271173	3.30945	ParB
Rhizobiales	Shinella sp. HZN7	GCA_001652565.1	ANH02675.1	GcrA cell cycle regulator	CP015736.1	115327	115863	-	shn_00555	639201	13.6622	GcrA
Rhizobiales	Shinella sp. HZN7	GCA_001652565.1	ANH06078.1	chromosome partitioning protein ParB	CP015736.1	4145938	4146828	-	shn_19905	4669812	99.8122	ParB
Rhizobiales	Shinella sp. HZN7	GCA_001652565.1	ANH05192.1	histidine phosphotransferase	CP015736.1	3073797	3074450	-	shn_14900	3597671	76.8964	ChpT
Rhizobiales	Shinella sp. HZN7	GCA_001652565.1	ANH03545.1	DNA-binding response regulator	CP015736.1	1151332	1152003	+	shn_05555	1675206	35.8057	CtrA
Rhizobiales	Shinella sp. HZN7	GCA_001652565.1	ANH02581.1	chromosomal replication initiation protein DnaA	CP015736.1	96	1547	+	shn_00005	523970	11.1993	DnaA
Rhizobiales	Shinella sp. HZN7	GCA_001652565.1	ANH04302.1	hybrid sensor histidine kinase/response regulator	CP015736.1	2013628	2016240	-	shn_09775	2537502	54.2364	CckA
Rhizobiales	Shinella sp. HZN7	GCA_001652565.1	ANH03348.1	modification methylase	CP015736.1	903622	904752	+	shn_04380	1427496	30.5112	CcrM
Rhizobiales	Shinella sp. HZN7	GCA_001652565.1	ANH03556.1	PAS domain-containing sensor histidine kinase	CP015736.1	1165615	1167963	-	shn_05610	1689489	36.111	DivL
Rhizobiales	Shinella sp. HZN7	GCA_001652565.1	ANH03788.1	ATP-dependent protease ATP-binding subunit ClpX	CP015736.1	1418143	1419420	+	shn_06860	1942017	41.5085	ClpX
Rhizobiales	Shinella sp. HZN7	GCA_001652565.1	ANH06117.1	alkaline phosphatase	CP015736.1	4194100	4196553	-	shn_20125	39377	0.841641	DivL
Rhizobiales	Shinella sp. HZN7	GCA_001652565.1	ANH06079.1	chromosome partitioning protein ParA	CP015736.1	4146853	4147647	-	shn_19910	4670727	99.8318	ParA
Rhizobiales	Sinorhizobium fredii NGR234	GCA_000018545.1	ACP25415.1	two component sensor kinase	CP001389.1	1697376	1699961	-	NGR_c16500	2084333	53.0945	CckA
Rhizobiales	Sinorhizobium fredii NGR234	GCA_000018545.1	ACP26508.1	hypothetical protein	CP001389.1	2872655	2873302	-	NGR_c27600	3259612	83.0326	ChpT
Rhizobiales	Sinorhizobium fredii NGR234	GCA_000018545.1	ACP27072.1	ParB-like partition protein	CP001389.1	3529670	3530560	-	NGR_c33420	3916627	99.7688	ParB
Rhizobiales	Sinorhizobium fredii NGR234	GCA_000018545.1	ACP23805.1	chromosomal replication initiator protein DnaA	CP001389.1	202	1644	+	NGR_c00010	387159	9.86216	DnaA
Rhizobiales	Sinorhizobium fredii NGR234	GCA_000018545.1	ACP24580.1	two component sensor kinase	CP001389.1	843215	845542	-	NGR_c07870	1230172	31.3364	DivL
Rhizobiales	Sinorhizobium fredii NGR234	GCA_000018545.1	ACP27073.1	cobyrinic acid a%2Cc-diamide synthase	CP001389.1	3530593	3531387	-	NGR_c33430	3917550	99.7923	ParA
Rhizobiales	Sinorhizobium fredii NGR234	GCA_000018545.1	ACP23952.1	hypothetical protein	CP001389.1	170132	170650	-	NGR_c01500	557089	14.1908	GcrA
Rhizobiales	Sinorhizobium fredii NGR234	GCA_000018545.1	ACP24348.1	modification methylase SmeIP	CP001389.1	606128	607258	+	NGR_c05520	993085	25.297	CcrM
Rhizobiales	Sinorhizobium fredii NGR234	GCA_000018545.1	ACP24824.1	ATP-dependent Clp protease ATP-binding subunit ClpX	CP001389.1	1094321	1095598	+	NGR_c10350	1481278	37.7328	ClpX
Rhizobiales	Sinorhizobium fredii NGR234	GCA_000018545.1	ACP24569.1	two-component response regulator protein	CP001389.1	829086	829757	+	NGR_c07760	1216043	30.9764	CtrA
Rhizobiales	Sinorhizobium fredii NGR234	GCA_000018545.1	ACP27117.1	sensory transduction histidine kinase	CP001389.1	3581644	3584127	-	NGR_c33870	42899	1.09277	DivL
Rhizobiales	Sinorhizobium meliloti	GCA_002197045.1	ASP79101.1	GcrA cell cycle regulator	CP021808.1	2977197	2977718	-	CDO27_14705	552924	15.0312	GcrA
Rhizobiales	Sinorhizobium meliloti	GCA_002197045.1	ASP78629.1	chromosome partitioning protein ParB	CP021808.1	2415179	2416069	-	CDO27_11990	3669410	99.7528	ParB
Rhizobiales	Sinorhizobium meliloti	GCA_002197045.1	ASP78630.1	ParA family protein	CP021808.1	2416102	2416896	-	CDO27_11995	3670333	99.7779	ParA
Rhizobiales	Sinorhizobium meliloti	GCA_002197045.1	ASP78115.1	histidine phosphotransferase	CP021808.1	1781425	1782090	-	CDO27_09130	3035656	82.5242	ChpT
Rhizobiales	Sinorhizobium meliloti	GCA_002197045.1	ASP79494.1	restriction endonuclease subunit M	CP021808.1	3427496	3428626	+	CDO27_16945	1003223	27.2726	CcrM
Rhizobiales	Sinorhizobium meliloti	GCA_002197045.1	ASP78672.1	two-component sensor histidine kinase	CP021808.1	2465217	2467697	-	CDO27_12205	40944	1.11306	DivL
Rhizobiales	Sinorhizobium meliloti	GCA_002197045.1	ASP79590.1	PAS domain-containing sensor histidine kinase	CP021808.1	3532392	3534710	-	CDO27_17490	1108119	30.1242	DivL
Rhizobiales	Sinorhizobium meliloti	GCA_002197045.1	ASP79580.1	DNA-binding response regulator	CP021808.1	3518356	3519027	+	CDO27_17435	1094083	29.7426	CtrA
Rhizobiales	Sinorhizobium meliloti	GCA_002197045.1	ASP76658.1	ATP-dependent Clp protease ATP-binding subunit ClpX	CP021808.1	145714	146991	+	CDO27_00720	1399945	38.0575	ClpX
Rhizobiales	Sinorhizobium meliloti	GCA_002197045.1	ASP77171.1	hybrid sensor histidine kinase/response regulator	CP021808.1	730271	732880	-	CDO27_03705	1984502	53.9486	CckA
Rhizobiales	Sinorhizobium meliloti	GCA_002197045.1	ASP78972.1	chromosomal replication initiation protein DnaA	CP021808.1	2817791	2819404	+	CDO27_13945	393518	10.6978	DnaA
Rhizobiales	Sinorhizobium meliloti 1021	GCA_000006965.1	CAC41425.1	Putative sensor histidine kinase	AL591688.1	43498	45978	-	SMc02756	43498	1.19038	DivL
Rhizobiales	Sinorhizobium meliloti 1021	GCA_000006965.1	CAC41805.1	Chromosomal replication initiator	AL591688.1	399330	400853	+	SMc01167	399330	10.9282	DnaA
Rhizobiales	Sinorhizobium meliloti 1021	GCA_000006965.1	CAC45088.1	Conserved hypothetical protein	AL591688.1	573161	573682	-	SMc02139	573161	15.6853	GcrA
Rhizobiales	Sinorhizobium meliloti 1021	GCA_000006965.1	CAC45498.1	Adenine DNA methyltransferase	AL591688.1	1014504	1015634	+	SMc00021	1014504	27.7632	CcrM
Rhizobiales	Sinorhizobium meliloti 1021	GCA_000006965.1	CAC45835.1	Probable ATP-dependent CLP protease ATP-binding subunit	AL591688.1	1363000	1364277	+	SMc01904	1363000	37.3002	ClpX
Rhizobiales	Sinorhizobium meliloti 1021	GCA_000006965.1	CAC46381.1	Putative sensor histidine kinase transmembrane protein	AL591688.1	1952055	1954664	-	SMc00471	1952055	53.4204	CckA
Rhizobiales	Sinorhizobium meliloti 1021	GCA_000006965.1	CAC47297.1	Cell cycle transcriptional regulator CtrA%2C autoregulated%2C response regulator	AL591688.1	2922080	2922781	+	SMc00654	2922080	79.9664	CtrA
Rhizobiales	Sinorhizobium meliloti 1021	GCA_000006965.1	CAC47299.1	ChpT histidine phosphotransferase	AL591688.1	2923767	2924432	-	SMc00652	2923767	80.0126	ChpT
Rhizobiales	Sinorhizobium meliloti 1021	GCA_000006965.1	CAC47913.1	Probable chromosome partitioning protein ParB	AL591688.1	3645114	3646004	-	SMc02801	3645114	99.7531	ParB
Rhizobiales	Sinorhizobium meliloti 1021	GCA_000006965.1	CAC47914.1	Probable chromosome partitioning protein ParA	AL591688.1	3646037	3646831	-	SMc02800	3646037	99.7784	ParA
Rhizobiales	Sinorhizobium sp. CCBAU 05631	GCA_002288505.1	ASY55097.1	GcrA cell cycle regulator	CP023063.1	137399	137917	-	SS05631_c01370	511299	12.7238	GcrA
Rhizobiales	Sinorhizobium sp. CCBAU 05631	GCA_002288505.1	ASY55717.1	Two-component sensor histidine kinase PleC	CP023063.1	742301	744628	-	SS05631_c07640	1116201	27.777	DivL
Rhizobiales	Sinorhizobium sp. CCBAU 05631	GCA_002288505.1	ASY58085.1	Signal transduction histidine kinase	CP023063.1	3017272	3017916	-	SS05631_c31640	3391172	84.3904	ChpT
Rhizobiales	Sinorhizobium sp. CCBAU 05631	GCA_002288505.1	ASY58721.1	sensor	CP023063.1	3686314	3688815	-	SS05631_c38090	41781	1.03973	DivL
Rhizobiales	Sinorhizobium sp. CCBAU 05631	GCA_002288505.1	ASY54963.1	Chromosomal replication initiator protein DnaA	CP023063.1	22	1545	+	SS05631_c00010	373922	9.30517	DnaA
Rhizobiales	Sinorhizobium sp. CCBAU 05631	GCA_002288505.1	ASY55606.1	Modification methylase	CP023063.1	640019	641149	+	SS05631_c06510	1013919	25.2317	CcrM
Rhizobiales	Sinorhizobium sp. CCBAU 05631	GCA_002288505.1	ASY58673.1	Chromosome (plasmid) partitioning protein ParB	CP023063.1	3635493	3636383	-	SS05631_c37610	4009393	99.775	ParB
Rhizobiales	Sinorhizobium sp. CCBAU 05631	GCA_002288505.1	ASY56742.1	sensory box histidine kinase/response regulator	CP023063.1	1704635	1707247	-	SS05631_c18100	2078535	51.725	CckA
Rhizobiales	Sinorhizobium sp. CCBAU 05631	GCA_002288505.1	ASY58674.1	Chromosome (plasmid) partitioning protein ParA	CP023063.1	3636415	3637209	-	SS05631_c37620	4010315	99.798	ParA
Rhizobiales	Sinorhizobium sp. CCBAU 05631	GCA_002288505.1	ASY55705.1	Two-component system response regulator QseB	CP023063.1	728275	728946	+	SS05631_c07520	1102175	27.428	CtrA
Rhizobiales	Sinorhizobium sp. CCBAU 05631	GCA_002288505.1	ASY55954.1	ATP-dependent Clp protease ATP-binding subunit ClpX	CP023063.1	975964	977241	+	SS05631_c10030	1349864	33.5918	ClpX
Rhizobiales	Starkeya novella DSM 506	GCA_000092925.1	ADH88070.1	multi-sensor signal transduction histidine kinase	CP002026.1	765734	768046	-	Snov_0739	1493299	31.3388	DivL
Rhizobiales	Starkeya novella DSM 506	GCA_000092925.1	ADH91073.1	Cobyrinic acid ac-diamide synthase	CP002026.1	4026769	4027632	-	Snov_3803	4754334	99.7757	ParA
Rhizobiales	Starkeya novella DSM 506	GCA_000092925.1	ADH88056.1	two component transcriptional regulator%2C winged helix family	CP002026.1	749753	750454	+	Snov_0725	1477318	31.0034	CtrA
Rhizobiales	Starkeya novella DSM 506	GCA_000092925.1	ADH91682.1	DNA methylase N-4/N-6 domain protein	CP002026.1	4671181	4672368	-	Snov_4425	633723	13.2995	CcrM
Rhizobiales	Starkeya novella DSM 506	GCA_000092925.1	ADH87634.1	integral membrane sensor signal transduction histidine kinase	CP002026.1	288476	290995	+	Snov_0300	1016041	21.3229	DivL
Rhizobiales	Starkeya novella DSM 506	GCA_000092925.1	ADH91072.1	parB-like partition protein	CP002026.1	4025839	4026756	-	Snov_3802	4753404	99.7562	ParB
Rhizobiales	Starkeya novella DSM 506	GCA_000092925.1	ADH87911.1	chromosomal replication initiator protein DnaA	CP002026.1	610337	611848	-	Snov_0578	1337902	28.0776	DnaA
Rhizobiales	Starkeya novella DSM 506	GCA_000092925.1	ADH89887.1	Protein of unknown function DUF2328	CP002026.1	2715187	2715834	-	Snov_2592	3442752	72.2505	ChpT
Rhizobiales	Starkeya novella DSM 506	GCA_000092925.1	ADH89513.1	ATP-dependent Clp protease%2C ATP-binding subunit ClpX	CP002026.1	2314167	2315438	-	Snov_2217	3041732	63.8346	ClpX
Rhizobiales	Starkeya novella DSM 506	GCA_000092925.1	ADH89548.1	multi-sensor hybrid histidine kinase	CP002026.1	2352863	2355382	-	Snov_2252	3080428	64.6467	CckA
Rhizobiales	Starkeya novella DSM 506	GCA_000092925.1	ADH91751.1	GcrA cell cycle regulator	CP002026.1	4752733	4753239	+	Snov_4495	715275	15.0109	GcrA
Rhodobacterales	Celeribacter ethanolicus	GCA_002407265.1	ATG48225.1	modification methylase	CP022196.1	2445618	2446718	-	CEW89_12020	3830424	95.539	CcrM
Rhodobacterales	Celeribacter ethanolicus	GCA_002407265.1	ATG48380.1	ParA family protein	CP022196.1	2618002	2618802	-	CEW89_12895	4002808	99.8387	ParA
Rhodobacterales	Celeribacter ethanolicus	GCA_002407265.1	ATG49351.1	GcrA cell cycle regulator	CP022196.1	3714939	3715523	-	CEW89_18270	1090469	27.1987	GcrA
Rhodobacterales	Celeribacter ethanolicus	GCA_002407265.1	ATG48379.1	chromosome partitioning protein ParB	CP022196.1	2617090	2617998	-	CEW89_12890	4001896	99.8159	ParB
Rhodobacterales	Celeribacter ethanolicus	GCA_002407265.1	ATG48399.1	diguanylate cyclase	CP022196.1	2641589	2643178	-	CEW89_13005	17119	0.426985	DivL
Rhodobacterales	Celeribacter ethanolicus	GCA_002407265.1	ATG48458.1	chromosomal replication initiation protein DnaA	CP022196.1	2701993	2703363	+	CEW89_13320	77523	1.93359	DnaA
Rhodobacterales	Celeribacter ethanolicus	GCA_002407265.1	ATG49702.1	hybrid sensor histidine kinase/response regulator	CP022196.1	1098036	1100342	-	CEW89_05315	2482842	61.9274	CckA
Rhodobacterales	Celeribacter ethanolicus	GCA_002407265.1	ATG46264.1	ATP-dependent protease ATP-binding subunit ClpX	CP022196.1	217521	218792	+	CEW89_00955	1602327	39.9655	ClpX
Rhodobacterales	Celeribacter ethanolicus	GCA_002407265.1	ATG46757.1	DNA-binding response regulator	CP022196.1	768377	769096	-	CEW89_03795	2153183	53.705	CtrA
Rhodobacterales	Celeribacter ethanolicus	GCA_002407265.1	ATG46389.1	histidine phosphotransferase	CP022196.1	362957	363556	-	CEW89_01685	1747763	43.593	ChpT
Rhodobacterales	Celeribacter marinus	GCA_001308265.1	ALI54593.1	sensory box histidine kinase/response regulator	CP012023.1	646500	648812	-	IMCC12053_645	2007825	64.8375	CckA
Rhodobacterales	Celeribacter marinus	GCA_001308265.1	ALI55832.1	modification methylase	CP012023.1	1851233	1852333	+	IMCC12053_1885	115853	3.74117	CcrM
Rhodobacterales	Celeribacter marinus	GCA_001308265.1	ALI55017.1	GcrA cell cycle regulator	CP012023.1	1070861	1071472	+	IMCC12053_1069	2432186	78.5411	GcrA
Rhodobacterales	Celeribacter marinus	GCA_001308265.1	ALI55724.1	chromosome (plasmid) partitioning protein ParA	CP012023.1	1741462	1742265	+	IMCC12053_1777	6082	0.196402	ParA
Rhodobacterales	Celeribacter marinus	GCA_001308265.1	ALI56147.1	ATP-dependent Clp protease ATP-binding subunit ClpX	CP012023.1	2137401	2138666	-	IMCC12053_2200	402021	12.9822	ClpX
Rhodobacterales	Celeribacter marinus	GCA_001308265.1	ALI54514.1	signal transduction histidine kinase	CP012023.1	564930	565529	+	IMCC12053_566	1926255	62.2034	ChpT
Rhodobacterales	Celeribacter marinus	GCA_001308265.1	ALI54446.1	DNA-binding response regulator CtrA	CP012023.1	504775	505488	-	IMCC12053_497	1866100	60.2608	CtrA
Rhodobacterales	Celeribacter marinus	GCA_001308265.1	ALI55642.1	chromosomal replication initiator protein DnaA	CP012023.1	1662914	1664323	-	IMCC12053_1695	3024239	97.6599	DnaA
Rhodobacterales	Celeribacter marinus	GCA_001308265.1	ALI55725.1	chromosome (plasmid) partitioning protein ParB	CP012023.1	1742262	1743182	+	IMCC12053_1778	6882	0.222236	ParB
Rhodobacterales	Celeribacter marinus	GCA_001308265.1	ALI55681.1	sensor	CP012023.1	1695394	1696860	-	IMCC12053_1734	3056719	98.7088	DivL
Rhodobacterales	Defluviimonas alba	GCA_001620265.1	AMY71710.1	PAS/PAC sensor domain-containing protein	CP012661.1	4444788	4446332	+	AKL17_4498	4701209	99.2173	DivL
Rhodobacterales	Defluviimonas alba	GCA_001620265.1	AMY69680.1	signal transduction histidine kinase	CP012661.1	2428155	2430467	-	AKL17_2435	2684576	56.657	CckA
Rhodobacterales	Defluviimonas alba	GCA_001620265.1	AMY70348.1	sensor histidine kinase/response regulator receiver protein	CP012661.1	3093619	3095841	+	AKL17_3115	3350040	70.7013	DivL
Rhodobacterales	Defluviimonas alba	GCA_001620265.1	AMY68068.1	chromosomal replication initiation protein	CP012661.1	784328	785713	+	AKL17_0809	1040749	21.9646	DnaA
Rhodobacterales	Defluviimonas alba	GCA_001620265.1	AMY68442.1	GcrA cell cycle regulator	CP012661.1	1161635	1162291	-	AKL17_1186	1418056	29.9275	GcrA
Rhodobacterales	Defluviimonas alba	GCA_001620265.1	AMY71753.1	chromosome partitioning protein ParA	CP012661.1	4487935	4488741	+	AKL17_4541	6058	0.127852	ParA
Rhodobacterales	Defluviimonas alba	GCA_001620265.1	AMY71816.1	DNA methylase N-4/N-6 domain-containing protein	CP012661.1	4551478	4552602	+	AKL17_4606	69601	1.4689	CcrM
Rhodobacterales	Defluviimonas alba	GCA_001620265.1	AMY69210.1	cell cycle transcriptional regulator CtrA	CP012661.1	1943261	1943974	-	AKL17_1961	2199682	46.4235	CtrA
Rhodobacterales	Defluviimonas alba	GCA_001620265.1	AMY71754.1	chromosome-partitioning protein ParB	CP012661.1	4488753	4489658	+	AKL17_4542	6876	0.145115	ParB
Rhodobacterales	Defluviimonas alba	GCA_001620265.1	AMY69253.1	ATP-dependent Clp protease ATP-binding subunit ClpX	CP012661.1	1988108	1989382	-	AKL17_2004	2244529	47.3699	ClpX
Rhodobacterales	Dinoroseobacter shibae DFL 12 = DSM 16493	GCA_000018145.1	ABV94349.1	putative gcrA cell cycle regulator	CP000830.1	2777782	2778405	+	Dshi_2616	2933991	77.4225	GcrA
Rhodobacterales	Dinoroseobacter shibae DFL 12 = DSM 16493	GCA_000018145.1	ABV95106.1	chromosomal replication initiation protein	CP000830.1	3544704	3546086	+	Dshi_3373	3700913	97.6601	DnaA
Rhodobacterales	Dinoroseobacter shibae DFL 12 = DSM 16493	GCA_000018145.1	ABV93386.1	histidine kinase	CP000830.1	1705935	1708274	-	Dshi_1644	1862144	49.1385	CckA
Rhodobacterales	Dinoroseobacter shibae DFL 12 = DSM 16493	GCA_000018145.1	ABV95190.1	chromosome partitioning protein ParA	CP000830.1	3639355	3640161	+	Dshi_3457	5980	0.157801	ParA
Rhodobacterales	Dinoroseobacter shibae DFL 12 = DSM 16493	GCA_000018145.1	ABV93129.1	ATP-dependent Clp protease	CP000830.1	1440553	1441812	-	Dshi_1387	1596762	42.1355	ClpX
Rhodobacterales	Dinoroseobacter shibae DFL 12 = DSM 16493	GCA_000018145.1	ABV95191.1	chromosome partitioning protein parB	CP000830.1	3640179	3641078	+	Dshi_3458	6804	0.179545	ParB
Rhodobacterales	Dinoroseobacter shibae DFL 12 = DSM 16493	GCA_000018145.1	ABV93250.1	cell cycle transcriptional regulator ctrA	CP000830.1	1567977	1568690	+	Dshi_1508	1724186	45.498	CtrA
Rhodobacterales	Dinoroseobacter shibae DFL 12 = DSM 16493	GCA_000018145.1	ABV95166.1	putative PAS/PAC sensor protein	CP000830.1	3613670	3614974	+	Dshi_3433	3769879	99.48	DivL
Rhodobacterales	Dinoroseobacter shibae DFL 12 = DSM 16493	GCA_000018145.1	ABV95079.1	multi-sensor hybrid histidine kinase	CP000830.1	3513033	3515378	-	Dshi_3346	3669242	96.8244	DivL
Rhodobacterales	Dinoroseobacter shibae DFL 12 = DSM 16493	GCA_000018145.1	ABV93212.1	conserved hypothetical protein	CP000830.1	1525195	1525809	-	Dshi_1470	1681404	44.3691	ChpT
Rhodobacterales	Dinoroseobacter shibae DFL 12 = DSM 16493	GCA_000018145.1	ABV95065.1	sensor histidine kinase/response regulator	CP000830.1	3497022	3499481	+	Dshi_3332	3653231	96.4019	DivL
Rhodobacterales	Dinoroseobacter shibae DFL 12 = DSM 16493	GCA_000018145.1	ABV91773.1	adenine-specific methyltransferase	CP000830.1	27713	28819	+	Dshi_0024	183922	4.85336	CcrM
Rhodobacterales	Epibacterium mobile	GCA_900574125.1	VCU57273.1	Chromosomal replication initiator protein DnaA	LR027553.1	173047	174423	+	EPIB1_171	2293203	72.0261	DnaA
Rhodobacterales	Epibacterium mobile	GCA_900574125.1	VCU59882.1	Modification methylase	LR027553.1	2876001	2877158	-	EPIB1_2774	1812309	56.922	CcrM
Rhodobacterales	Epibacterium mobile	GCA_900574125.1	VCU58724.1	FIG118788: Signal transduction histidine kinase	LR027553.1	1679422	1680018	+	EPIB1_1622	615730	19.3392	ChpT
Rhodobacterales	Epibacterium mobile	GCA_900574125.1	VCU58567.1	DNA-binding response regulator CtrA	LR027553.1	1511545	1512264	+	EPIB1_1465	447853	14.0664	CtrA
Rhodobacterales	Epibacterium mobile	GCA_900574125.1	VCU60152.1	FIG056333: sensor	LR027553.1	3162285	3163835	+	EPIB1_3038	2098593	65.9137	DivL
Rhodobacterales	Epibacterium mobile	GCA_900574125.1	VCU58702.1	sensory box histidine kinase/response regulator	LR027553.1	1655483	1657792	-	EPIB1_1600	591791	18.5873	CckA
Rhodobacterales	Epibacterium mobile	GCA_900574125.1	VCU58444.1	ATP-dependent Clp protease ATP-binding subunit ClpX	LR027553.1	1380922	1382187	+	EPIB1_1342	317230	9.96373	ClpX
Rhodobacterales	Epibacterium mobile	GCA_900574125.1	VCU59315.1	GcrA cell cycle regulator	LR027553.1	2284312	2284902	+	EPIB1_2213	1220620	38.3379	GcrA
Rhodobacterales	Epibacterium mobile	GCA_900574125.1	VCU57109.1	Chromosome (plasmid) partitioning protein ParB	LR027553.1	6795	7694	+	EPIB1_7	2126951	66.8044	ParB
Rhodobacterales	Epibacterium mobile	GCA_900574125.1	VCU57108.1	Chromosome (plasmid) partitioning protein ParA	LR027553.1	5964	6776	+	EPIB1_6	2126120	66.7783	ParA
Rhodobacterales	Gemmobacter sp. HYN0069	GCA_003060865.1	AWB47273.1	hybrid sensor histidine kinase/response regulator	CP028918.1	229082	231598	+	HYN69_01020	319317	8.64286	DivL
Rhodobacterales	Gemmobacter sp. HYN0069	GCA_003060865.1	AWB50381.1	GcrA cell cycle regulator	CP028918.1	2634604	2635221	+	HYN69_12705	2724839	73.7524	GcrA
Rhodobacterales	Gemmobacter sp. HYN0069	GCA_003060865.1	AWB50055.1	chromosome partitioning protein ParB	CP028918.1	3611218	3612129	+	HYN69_17480	6877	0.186138	ParB
Rhodobacterales	Gemmobacter sp. HYN0069	GCA_003060865.1	AWB48828.1	ATP-dependent Clp protease ATP-binding subunit ClpX	CP028918.1	2121701	2122969	-	HYN69_10190	2211936	59.8698	ClpX
Rhodobacterales	Gemmobacter sp. HYN0069	GCA_003060865.1	AWB50054.1	chromosome partitioning protein ParA	CP028918.1	3610397	3611218	+	HYN69_17475	6056	0.163916	ParA
Rhodobacterales	Gemmobacter sp. HYN0069	GCA_003060865.1	AWB48193.1	histidine phosphotransferase	CP028918.1	1320022	1320621	-	HYN69_06410	1410257	38.171	ChpT
Rhodobacterales	Gemmobacter sp. HYN0069	GCA_003060865.1	AWB47130.1	modification methylase	CP028918.1	21989	23113	+	HYN69_00125	112224	3.03753	CcrM
Rhodobacterales	Gemmobacter sp. HYN0069	GCA_003060865.1	AWB48696.1	DNA-binding response regulator	CP028918.1	1958070	1958789	-	HYN69_09395	2048305	55.4409	CtrA
Rhodobacterales	Gemmobacter sp. HYN0069	GCA_003060865.1	AWB47111.1	chromosomal replication initiator protein DnaA	CP028918.1	1	1383	+	HYN69_00005	90236	2.44239	DnaA
Rhodobacterales	Ketogulonicigenium robustum	GCA_002117445.1	ARO15715.1	Sensor protein divL	CP019937.1	2359540	2361051	-	BVG79_02375	17792	0.725474	DivL
Rhodobacterales	Ketogulonicigenium robustum	GCA_002117445.1	ARO15742.1	modification methylase	CP019937.1	2387038	2388141	+	BVG79_02402	45290	1.84671	CcrM
Rhodobacterales	Ketogulonicigenium robustum	GCA_002117445.1	ARO14812.1	ATP-dependent protease ATP-binding subunit	CP019937.1	1438009	1439280	-	BVG79_01466	1548728	63.1498	ClpX
Rhodobacterales	Ketogulonicigenium robustum	GCA_002117445.1	ARO15692.1	chromosome partitioning protein ParA	CP019937.1	2335921	2336685	-	BVG79_02352	2446640	99.7624	ParA
Rhodobacterales	Ketogulonicigenium robustum	GCA_002117445.1	ARO14249.1	histidine phosphotransferase ChpT	CP019937.1	886611	887195	-	BVG79_00897	997330	40.6664	ChpT
Rhodobacterales	Ketogulonicigenium robustum	GCA_002117445.1	ARO14354.1	cell cycle transcriptional regulator CtrA	CP019937.1	985272	985973	+	BVG79_01008	1095991	44.6893	CtrA
Rhodobacterales	Ketogulonicigenium robustum	GCA_002117445.1	ARO15389.1	chromosomal replication initiation protein	CP019937.1	2041327	2042766	-	BVG79_02049	2152046	87.7503	DnaA
Rhodobacterales	Ketogulonicigenium robustum	GCA_002117445.1	ARO15691.1	chromosome partitioning protein parB	CP019937.1	2335017	2335910	-	BVG79_02351	2445736	99.7255	ParB
Rhodobacterales	Ketogulonicigenium vulgare Y25	GCA_000164885.1	ADO42682.1	cell cycle transcriptional regulator CtrA	CP002224.1	1495344	1496060	-	EIO_1556	1609775	57.9873	CtrA
Rhodobacterales	Ketogulonicigenium vulgare Y25	GCA_000164885.1	ADO43824.1	chromosome partitioning protein ParA	CP002224.1	2655831	2656595	-	EIO_2750	2770262	99.7903	ParA
Rhodobacterales	Ketogulonicigenium vulgare Y25	GCA_000164885.1	ADO42277.1	conserved hypothetical protein	CP002224.1	1088312	1088896	-	EIO_1132	1202743	43.3252	ChpT
Rhodobacterales	Ketogulonicigenium vulgare Y25	GCA_000164885.1	ADO43823.1	chromosome partitioning protein parB	CP002224.1	2654926	2655819	-	EIO_2749	2769357	99.7577	ParB
Rhodobacterales	Ketogulonicigenium vulgare Y25	GCA_000164885.1	ADO43844.1	Sensor protein divL	CP002224.1	2678178	2679683	-	EIO_2771	16525	0.595263	DivL
Rhodobacterales	Ketogulonicigenium vulgare Y25	GCA_000164885.1	ADO42873.1	ATP-dependent protease ATP-binding subunit	CP002224.1	1692624	1693892	-	EIO_1755	1807055	65.0937	ClpX
Rhodobacterales	Ketogulonicigenium vulgare Y25	GCA_000164885.1	ADO43475.1	chromosomal replication initiation protein	CP002224.1	2322916	2324322	-	EIO_2387	2437347	87.798	DnaA
Rhodobacterales	Ketogulonicigenium vulgare Y25	GCA_000164885.1	ADO43877.1	modification methylase	CP002224.1	2711160	2712263	+	EIO_2806	49507	1.78334	CcrM
Rhodobacterales	Leisingera sp. NJS204	GCA_004123675.1	QAX31189.1	response regulator	CP035417.1	3798375	3800663	+	ETW24_18415	3935727	92.6912	DivL
Rhodobacterales	Leisingera sp. NJS204	GCA_004123675.1	QAX31278.1	site-specific DNA-methyltransferase	CP035417.1	3899064	3900167	-	ETW24_18885	4036416	95.0626	CcrM
Rhodobacterales	Leisingera sp. NJS204	GCA_004123675.1	QAX27935.1	chromosomal replication initiator protein DnaA	CP035417.1	1	1413	+	ETW24_00005	137353	3.23483	DnaA
Rhodobacterales	Leisingera sp. NJS204	GCA_004123675.1	QAX31498.1	diguanylate cyclase	CP035417.1	4129751	4131298	-	ETW24_20080	21040	0.495518	DivL
Rhodobacterales	Leisingera sp. NJS204	GCA_004123675.1	QAX29667.1	histidine phosphotransferase	CP035417.1	2030750	2031346	-	ETW24_09980	2168102	51.0615	ChpT
Rhodobacterales	Leisingera sp. NJS204	GCA_004123675.1	QAX29392.1	ATP-dependent Clp protease ATP-binding subunit ClpX	CP035417.1	1723227	1724495	+	ETW24_08485	1860579	43.8189	ClpX
Rhodobacterales	Leisingera sp. NJS204	GCA_004123675.1	QAX29476.1	response regulator transcription factor	CP035417.1	1815838	1816557	+	ETW24_08950	1953190	46	CtrA
Rhodobacterales	Leisingera sp. NJS204	GCA_004123675.1	QAX31470.1	ParB/RepB/Spo0J family partition protein	CP035417.1	4101267	4102160	-	ETW24_19935	4238619	99.8247	ParB
Rhodobacterales	Leisingera sp. NJS204	GCA_004123675.1	QAX29566.1	response regulator	CP035417.1	1923882	1926197	+	ETW24_09445	2061234	48.5446	CckA
Rhodobacterales	Leisingera sp. NJS204	GCA_004123675.1	QAX31471.1	ParA family protein	CP035417.1	4102187	4102996	-	ETW24_19940	4239539	99.8464	ParA
Rhodobacterales	Leisingera sp. NJS204	GCA_004123675.1	QAX31215.1	PAS domain-containing sensor histidine kinase	CP035417.1	3827865	3830132	-	ETW24_18550	3965217	93.3857	DivL
Rhodobacterales	Leisingera sp. NJS204	GCA_004123675.1	QAX29018.1	GcrA cell cycle regulator	CP035417.1	1307142	1307741	-	ETW24_06390	1444494	34.0196	GcrA
Rhodobacterales	Marinovum algicola DG 898	GCA_001046955.1	AKO95696.1	hypothetical protein	CP010855.1	503989	504573	+	MALG_00499	556989	14.9442	GcrA
Rhodobacterales	Marinovum algicola DG 898	GCA_001046955.1	AKO98723.1	chromosome partitioning protein ParA	CP010855.1	3668278	3669087	-	MALG_03580	3721278	99.843	ParA
Rhodobacterales	Marinovum algicola DG 898	GCA_001046955.1	AKO98722.1	chromosome partitioning protein parB	CP010855.1	3667376	3668266	-	MALG_03579	3720376	99.8188	ParB
Rhodobacterales	Marinovum algicola DG 898	GCA_001046955.1	AKO95512.1	DNA modification methylase	CP010855.1	315812	316927	-	MALG_00307	368812	9.89533	CcrM
Rhodobacterales	Marinovum algicola DG 898	GCA_001046955.1	AKO96530.1	DNA-binding protein response regulator CtrA	CP010855.1	1379116	1379919	+	MALG_01345	1432116	38.4241	CtrA
Rhodobacterales	Marinovum algicola DG 898	GCA_001046955.1	AKO98650.1	hypothetical protein	CP010855.1	3591278	3592828	+	MALG_03507	3644278	97.777	DivL
Rhodobacterales	Marinovum algicola DG 898	GCA_001046955.1	AKO96742.1	PAS domain protein S-box	CP010855.1	1608081	1610399	+	MALG_01564	1661081	44.5673	CckA
Rhodobacterales	Marinovum algicola DG 898	GCA_001046955.1	AKO97591.1	endopeptidase Clp ATP-binding protein regulatory subunit (clpX)	CP010855.1	2500281	2501546	-	MALG_02427	2553281	68.5053	ClpX
Rhodobacterales	Marinovum algicola DG 898	GCA_001046955.1	AKO96763.1	hypothetical protein	CP010855.1	1631973	1632596	-	MALG_01586	1684973	45.2083	ChpT
Rhodobacterales	Marinovum algicola DG 898	GCA_001046955.1	AKO95220.1	chromosomal replication initiator protein DnaA	CP010855.1	182	1576	+	MALG_00001	53182	1.42689	DnaA
Rhodobacterales	Marivivens sp. JLT3646	GCA_001908835.1	APO88174.1	chromosomal replication initiation protein DnaA	CP018572.1	2951935	2953290	+	BSK21_14820	114663	3.85015	DnaA
Rhodobacterales	Marivivens sp. JLT3646	GCA_001908835.1	APO88056.1	chromosome partitioning protein ParA	CP018572.1	2830834	2831634	-	BSK21_14160	2971707	99.7838	ParA
Rhodobacterales	Marivivens sp. JLT3646	GCA_001908835.1	APO87687.1	GcrA cell cycle regulator	CP018572.1	2410180	2410776	+	BSK21_11990	2551053	85.6591	GcrA
Rhodobacterales	Marivivens sp. JLT3646	GCA_001908835.1	APO86752.1	hypothetical protein	CP018572.1	1364886	1365467	+	BSK21_06770	1505759	50.5603	ChpT
Rhodobacterales	Marivivens sp. JLT3646	GCA_001908835.1	APO88076.1	hypothetical protein	CP018572.1	2854949	2856517	-	BSK21_14280	17677	0.593557	DivL
Rhodobacterales	Marivivens sp. JLT3646	GCA_001908835.1	APO86176.1	ATP-dependent protease ATP-binding subunit ClpX	CP018572.1	681061	682329	+	BSK21_03435	821934	27.5989	ClpX
Rhodobacterales	Marivivens sp. JLT3646	GCA_001908835.1	APO86782.1	DNA-binding response regulator	CP018572.1	1399186	1399899	-	BSK21_06930	1540059	51.712	CtrA
Rhodobacterales	Marivivens sp. JLT3646	GCA_001908835.1	APO88055.1	chromosome partitioning protein ParB	CP018572.1	2829921	2830823	-	BSK21_14155	2970794	99.7532	ParB
Rhodobacterales	Marivivens sp. JLT3646	GCA_001908835.1	APO87916.1	modification methylase	CP018572.1	2674105	2675208	-	BSK21_13360	2814978	94.5212	CcrM
Rhodobacterales	Octadecabacter antarcticus 307	GCA_000155675.2	AGI70165.1	PAS domain-containing protein	CP003740.1	4752503	4754104	-	OAN307_c48200	18826	0.391181	DivL
Rhodobacterales	Octadecabacter antarcticus 307	GCA_000155675.2	AGI67941.1	sensor transduction histidine kianse	CP003740.1	2318255	2320588	+	OAN307_c23190	2397178	49.8105	CckA
Rhodobacterales	Octadecabacter antarcticus 307	GCA_000155675.2	AGI70142.1	chromosome-partitioning protein ParA	CP003740.1	4727739	4728557	-	OAN307_c47970	4806662	99.8766	ParA
Rhodobacterales	Octadecabacter antarcticus 307	GCA_000155675.2	AGI70141.1	chromosome-partitioning protein ParB	CP003740.1	4726852	4727742	-	OAN307_c47960	4805775	99.8582	ParB
Rhodobacterales	Octadecabacter antarcticus 307	GCA_000155675.2	AGI66961.1	ATP-dependent Clp protease ATP-binding subunit ClpX	CP003740.1	1270048	1271316	+	OAN307_c12670	1348971	28.03	ClpX
Rhodobacterales	Octadecabacter antarcticus 307	GCA_000155675.2	AGI69191.1	GcrA cell cycle regulator	CP003740.1	3681538	3682131	+	OAN307_c37320	3760461	78.1378	GcrA
Rhodobacterales	Octadecabacter antarcticus 307	GCA_000155675.2	AGI68003.1	cell cycle transcriptional regulator	CP003740.1	2398299	2399018	+	OAN307_c23880	2477222	51.4737	CtrA
Rhodobacterales	Octadecabacter antarcticus 307	GCA_000155675.2	AGI70057.1	modification methylase CcrM	CP003740.1	4636511	4637632	+	OAN307_c47110	4715434	97.981	CcrM
Rhodobacterales	Octadecabacter antarcticus 307	GCA_000155675.2	AGI65785.1	chromosomal replication initiatior protein DnaA	CP003740.1	101	1441	+	OAN307_c00010	79024	1.64202	DnaA
Rhodobacterales	Octadecabacter arcticus 238	GCA_000155735.2	AGI72569.1	ATP-dependent Clp protease ATP-binding subunit ClpX	CP003742.1	2659524	2660792	-	OA238_c25170	3154226	60.6549	ClpX
Rhodobacterales	Octadecabacter arcticus 238	GCA_000155735.2	AGI71619.1	sensor transduction histidine kianse	CP003742.1	1542278	1544614	+	OA238_c14740	2036980	39.1706	CckA
Rhodobacterales	Octadecabacter arcticus 238	GCA_000155735.2	AGI74071.1	modification methylase CcrM	CP003742.1	4403897	4405018	-	OA238_c41520	4898599	94.1988	CcrM
Rhodobacterales	Octadecabacter arcticus 238	GCA_000155735.2	AGI73326.1	GcrA cell cycle regulator	CP003742.1	3553323	3553919	+	OA238_c33450	4048025	77.8425	GcrA
Rhodobacterales	Octadecabacter arcticus 238	GCA_000155735.2	AGI74311.1	chromosome-partitioning protein ParB	CP003742.1	4712029	4712919	+	OA238_c44290	6452	0.12407	ParB
Rhodobacterales	Octadecabacter arcticus 238	GCA_000155735.2	AGI72228.1	cell cycle transcriptional regulator	CP003742.1	2259574	2260368	-	OA238_c21440	2754276	52.964	CtrA
Rhodobacterales	Octadecabacter arcticus 238	GCA_000155735.2	AGI71972.1	hypothetical protein	CP003742.1	1965035	1965622	-	OA238_c18650	2459737	47.3001	ChpT
Rhodobacterales	Octadecabacter arcticus 238	GCA_000155735.2	AGI70277.1	chromosomal replication initiatior protein DnaA	CP003742.1	101	1441	+	OA238_c00010	494803	9.51493	DnaA
Rhodobacterales	Octadecabacter temperatus	GCA_001187845.1	AKS47741.1	Sensor protein DivL	CP012160.1	3161122	3162723	-	OSB_32280	18740	0.579635	DivL
Rhodobacterales	Octadecabacter temperatus	GCA_001187845.1	AKS46151.1	Blue-light-activated protein	CP012160.1	1570339	1572678	-	OSB_16010	1661025	51.3761	CckA
Rhodobacterales	Octadecabacter temperatus	GCA_001187845.1	AKS46868.1	GcrA cell cycle regulator	CP012160.1	2282004	2282600	+	OSB_23320	2372690	73.3882	GcrA
Rhodobacterales	Octadecabacter temperatus	GCA_001187845.1	AKS47598.1	Modification methylase DpnIIB	CP012160.1	3017764	3018873	-	OSB_30820	3108450	96.1455	CcrM
Rhodobacterales	Octadecabacter temperatus	GCA_001187845.1	AKS47718.1	Chromosome partitioning protein ParA	CP012160.1	3136457	3137275	-	OSB_32050	3227143	99.8167	ParA
Rhodobacterales	Octadecabacter temperatus	GCA_001187845.1	AKS45727.1	ATP-dependent Clp protease ATP-binding subunit ClpX	CP012160.1	1118193	1119461	+	OSB_11710	1208879	37.3911	ClpX
Rhodobacterales	Octadecabacter temperatus	GCA_001187845.1	AKS46105.1	hypothetical protein	CP012160.1	1523809	1524399	+	OSB_15540	1614495	49.9369	ChpT
Rhodobacterales	Octadecabacter temperatus	GCA_001187845.1	AKS44570.1	Chromosomal replication initiator protein DnaA	CP012160.1	101	1501	+	OSB_00010	90787	2.80808	DnaA
Rhodobacterales	Octadecabacter temperatus	GCA_001187845.1	AKS47717.1	Chromosome-partitioning protein ParB	CP012160.1	3135570	3136460	-	OSB_32040	3226256	99.7893	ParB
Rhodobacterales	Octadecabacter temperatus	GCA_001187845.1	AKS46085.1	Cell cycle response regulator CtrA	CP012160.1	1507470	1508189	-	OSB_15340	1598156	49.4316	CtrA
Rhodobacterales	Pannonibacter phragmitetus	GCA_001484065.1	ALV25808.1	modification methylase	CP013068.1	193543	194682	+	APZ00_00865	4119287	77.4492	CcrM
Rhodobacterales	Pannonibacter phragmitetus	GCA_001484065.1	ALV26788.1	chromosome partitioning protein ParB	CP013068.1	1402596	1403519	+	APZ00_06570	9644	0.181323	ParB
Rhodobacterales	Pannonibacter phragmitetus	GCA_001484065.1	ALV26787.1	chromosome partitioning protein ParA	CP013068.1	1401660	1402484	+	APZ00_06565	8708	0.163724	ParA
Rhodobacterales	Pannonibacter phragmitetus	GCA_001484065.1	ALV28625.1	ATP-dependent Clp protease ATP-binding subunit ClpX	CP013068.1	3809288	3810553	+	APZ00_17440	2416336	45.431	ClpX
Rhodobacterales	Pannonibacter phragmitetus	GCA_001484065.1	ALV25742.1	GcrA cell cycle regulator	CP013068.1	111353	111925	+	APZ00_00500	4037097	75.9039	GcrA
Rhodobacterales	Pannonibacter phragmitetus	GCA_001484065.1	ALV26727.1	chromosomal replication initiation protein	CP013068.1	1325971	1327458	-	APZ00_06225	5251715	98.7406	DnaA
Rhodobacterales	Pannonibacter phragmitetus	GCA_001484065.1	ALV27306.1	two-component system response regulator	CP013068.1	2096331	2097023	-	APZ00_09715	703379	13.2247	CtrA
Rhodobacterales	Paracoccus jeotgali	GCA_002865605.1	AUM75071.1	chromosome partitioning protein ParB	CP025583.1	2688493	2689362	-	CYR75_12955	3113958	99.77	ParB
Rhodobacterales	Paracoccus jeotgali	GCA_002865605.1	AUM75072.1	chromosome partitioning protein ParA	CP025583.1	2689359	2690195	-	CYR75_12960	3114824	99.7978	ParA
Rhodobacterales	Paracoccus jeotgali	GCA_002865605.1	AUM73952.1	ATP-dependent Clp protease ATP-binding subunit ClpX	CP025583.1	1295191	1296453	-	CYR75_06350	1720656	55.1292	ClpX
Rhodobacterales	Paracoccus jeotgali	GCA_002865605.1	AUM74567.1	modification methylase	CP025583.1	2042148	2043260	+	CYR75_09990	2467613	79.0614	CcrM
Rhodobacterales	Paracoccus jeotgali	GCA_002865605.1	AUM75494.1	histidine phosphotransferase	CP025583.1	617198	617833	+	CYR75_03120	1042663	33.4065	ChpT
Rhodobacterales	Paracoccus jeotgali	GCA_002865605.1	AUM74328.1	DNA-binding response regulator	CP025583.1	1778032	1778742	-	CYR75_08650	2203497	70.5992	CtrA
Rhodobacterales	Paracoccus jeotgali	GCA_002865605.1	AUM75191.1	histidine kinase	CP025583.1	2829628	2831127	-	CYR75_13590	133957	4.29193	DivL
Rhodobacterales	Paracoccus jeotgali	GCA_002865605.1	AUM75693.1	chromosomal replication initiator protein DnaA	CP025583.1	2472781	2474142	-	CYR75_12060	2898246	92.8587	DnaA
Rhodobacterales	Paracoccus mutanolyticus	GCA_003285265.1	AWX93120.1	chromosome partitioning protein ParA	CP030239.1	1497523	1498299	+	DPM13_08050	5967	0.166103	ParA
Rhodobacterales	Paracoccus mutanolyticus	GCA_003285265.1	AWX92319.1	ATP-dependent Clp protease ATP-binding subunit ClpX	CP030239.1	148542	149807	-	DPM13_00870	2249343	62.6147	ClpX
Rhodobacterales	Paracoccus mutanolyticus	GCA_003285265.1	AWX92811.1	site-specific DNA-methyltransferase	CP030239.1	1004236	1005366	-	DPM13_05505	3105037	86.4345	CcrM
Rhodobacterales	Paracoccus mutanolyticus	GCA_003285265.1	AWX94357.1	chromosomal replication initiator protein DnaA	CP030239.1	457397	458788	+	DPM13_02615	2558198	71.2122	DnaA
Rhodobacterales	Paracoccus mutanolyticus	GCA_003285265.1	AWX93121.1	ParB/RepB/Spo0J family partition protein	CP030239.1	1498314	1499186	+	DPM13_08055	6758	0.188122	ParB
Rhodobacterales	Paracoccus mutanolyticus	GCA_003285265.1	AWX93056.1	histidine kinase	CP030239.1	1413895	1415493	-	DPM13_07575	3514696	97.8382	DivL
Rhodobacterales	Paracoccus sp. Arc7-R13	GCA_004010775.1	AZY94252.1	ATP-dependent Clp protease ATP-binding subunit ClpX	CP034810.1	2330991	2332256	-	EOJ32_11610	1907698	59.0266	ClpX
Rhodobacterales	Paracoccus sp. Arc7-R13	GCA_004010775.1	AZY92641.1	chromosomal replication initiator protein DnaA	CP034810.1	491643	493004	-	EOJ32_02410	68350	2.11484	DnaA
Rhodobacterales	Paracoccus sp. Arc7-R13	GCA_004010775.1	AZY92870.1	site-specific DNA-methyltransferase	CP034810.1	734832	735962	+	EOJ32_03635	311539	9.63941	CcrM
Rhodobacterales	Paracoccus sp. Arc7-R13	GCA_004010775.1	AZY93434.1	response regulator transcription factor	CP034810.1	1366664	1367374	+	EOJ32_06880	943371	29.1891	CtrA
Rhodobacterales	Paracoccus sp. Arc7-R13	GCA_004010775.1	AZY95087.1	PAS domain-containing protein	CP034810.1	384696	386258	+	EOJ32_01910	3193332	98.8058	DivL
Rhodobacterales	Paracoccus sp. Arc7-R13	GCA_004010775.1	AZY93884.1	histidine phosphotransferase	CP034810.1	1921588	1922211	-	EOJ32_09570	1498295	46.3592	ChpT
Rhodobacterales	Paracoccus sp. Arc7-R13	GCA_004010775.1	AZY94219.1	response regulator	CP034810.1	2293268	2295382	-	EOJ32_11430	1869975	57.8594	CckA
Rhodobacterales	Paracoccus sp. Arc7-R13	GCA_004010775.1	AZY92587.1	ParB/RepB/Spo0J family partition protein	CP034810.1	430144	431037	+	EOJ32_02110	6851	0.211979	ParB
Rhodobacterales	Paracoccus sp. Arc7-R13	GCA_004010775.1	AZY93174.1	GcrA cell cycle regulator	CP034810.1	1078082	1078705	-	EOJ32_05350	654789	20.26	GcrA
Rhodobacterales	Paracoccus sp. Arc7-R13	GCA_004010775.1	AZY92586.1	ParA family protein	CP034810.1	429359	430144	+	EOJ32_02105	6066	0.18769	ParA
Rhodobacterales	Paracoccus sp. BM15	GCA_002847305.1	AUH32475.1	GcrA cell cycle regulator	CP025408.1	577093	577701	+	CUV01_02900	2833455	75.3601	GcrA
Rhodobacterales	Paracoccus sp. BM15	GCA_002847305.1	AUH33202.1	histidine kinase	CP025408.1	1456502	1458100	-	CUV01_07185	3712864	98.7494	DivL
Rhodobacterales	Paracoccus sp. BM15	GCA_002847305.1	AUH33626.1	modification methylase	CP025408.1	1987746	1988873	+	CUV01_09710	484222	12.8786	CcrM
Rhodobacterales	Paracoccus sp. BM15	GCA_002847305.1	AUH35110.1	hybrid sensor histidine kinase/response regulator	CP025408.1	169335	171401	-	CUV01_00825	2425697	64.5152	CckA
Rhodobacterales	Paracoccus sp. BM15	GCA_002847305.1	AUH33244.1	chromosome partitioning protein ParB	CP025408.1	1510380	1511282	+	CUV01_07460	6856	0.182346	ParB
Rhodobacterales	Paracoccus sp. BM15	GCA_002847305.1	AUH33243.1	chromosome partitioning protein ParA	CP025408.1	1509590	1510387	+	CUV01_07455	6066	0.161335	ParA
Rhodobacterales	Paracoccus sp. BM15	GCA_002847305.1	AUH34310.1	histidine phosphotransferase	CP025408.1	2828044	2828664	-	CUV01_13765	1324520	35.2277	ChpT
Rhodobacterales	Paracoccus sp. BM15	GCA_002847305.1	AUH34615.1	ATP-dependent Clp protease ATP-binding subunit ClpX	CP025408.1	3187073	3188338	+	CUV01_15580	1683549	44.7766	ClpX
Rhodobacterales	Paracoccus sp. BM15	GCA_002847305.1	AUH33406.1	chromosomal replication initiator protein DnaA	CP025408.1	1703636	1705204	+	CUV01_08395	200112	5.32229	DnaA
Rhodobacterales	Paracoccus sp. BM15	GCA_002847305.1	AUH34726.1	DNA-binding response regulator	CP025408.1	3302579	3303289	+	CUV01_16235	1799055	47.8487	CtrA
Rhodobacterales	Paracoccus yeei	GCA_002073635.2	ARC36570.1	PAS domain-containing protein	CP020442.2	1422368	1423966	-	A6J80_09420	3543838	97.8386	DivL
Rhodobacterales	Paracoccus yeei	GCA_002073635.2	ARC36648.1	ParA family protein	CP020442.2	1506617	1507393	+	A6J80_09850	5960	0.164544	ParA
Rhodobacterales	Paracoccus yeei	GCA_002073635.2	ARC36230.1	site-specific DNA-methyltransferase	CP020442.2	1011885	1013015	-	A6J80_07440	3133355	86.5059	CcrM
Rhodobacterales	Paracoccus yeei	GCA_002073635.2	ARC35779.1	chromosomal replication initiator protein DnaA	CP020442.2	462480	463871	+	A6J80_04715	2583950	71.3379	DnaA
Rhodobacterales	Paracoccus yeei	GCA_002073635.2	ARC36649.1	ParB/RepB/Spo0J family partition protein	CP020442.2	1507408	1508280	+	A6J80_09855	6751	0.186382	ParB
Rhodobacterales	Paracoccus yeei	GCA_002073635.2	ARC35516.1	ATP-dependent Clp protease ATP-binding subunit ClpX	CP020442.2	150686	151951	-	A6J80_03190	2272156	62.7299	ClpX
Rhodobacterales	Paracoccus yeei	GCA_002073635.2	ARC38367.1	DNA-binding response regulator	CP020442.2	3597447	3598109	+	A6J80_20160	2096790	57.8884	CtrA
Rhodobacterales	Paracoccus zhejiangensis	GCA_002847445.1	AUH64767.1	chromosomal replication initiator protein DnaA	CP025430.1	2440973	2442376	-	CX676_11815	3564985	89.4576	DnaA
Rhodobacterales	Paracoccus zhejiangensis	GCA_002847445.1	AUH64551.1	GcrA cell cycle regulator	CP025430.1	2180753	2181376	+	CX676_10570	3304765	82.9278	GcrA
Rhodobacterales	Paracoccus zhejiangensis	GCA_002847445.1	AUH66139.1	ATP-dependent Clp protease ATP-binding subunit ClpX	CP025430.1	656898	658163	+	CX676_03350	1780910	44.6891	ClpX
Rhodobacterales	Paracoccus zhejiangensis	GCA_002847445.1	AUH65703.1	modification methylase	CP025430.1	3575310	3576440	+	CX676_17365	714210	17.922	CcrM
Rhodobacterales	Paracoccus zhejiangensis	GCA_002847445.1	AUH65101.1	chromosome partitioning protein ParB	CP025430.1	2853812	2854717	-	CX676_13725	3977824	99.8171	ParB
Rhodobacterales	Paracoccus zhejiangensis	GCA_002847445.1	AUH63499.1	DNA-binding response regulator	CP025430.1	870953	871663	+	CX676_04390	1994965	50.0604	CtrA
Rhodobacterales	Paracoccus zhejiangensis	GCA_002847445.1	AUH65102.1	chromosome partitioning protein ParA	CP025430.1	2854710	2855507	-	CX676_13730	3978722	99.8397	ParA
Rhodobacterales	Paracoccus zhejiangensis	GCA_002847445.1	AUH65340.1	hypothetical protein	CP025430.1	3135224	3137314	+	CX676_15175	274124	6.8787	DivL
Rhodobacterales	Paracoccus zhejiangensis	GCA_002847445.1	AUH63813.1	histidine phosphotransferase	CP025430.1	1276986	1277615	+	CX676_06275	2400998	60.2492	ChpT
Rhodobacterales	Paracoccus zhejiangensis	GCA_002847445.1	AUH65125.1	histidine kinase	CP025430.1	2885921	2887507	-	CX676_13865	24821	0.622843	DivL
Rhodobacterales	Phaeobacter gallaeciensis DSM 26640	GCA_000511385.1	AHD07811.1	chromosomal replication initiator protein DnaA	CP006966.1	104	1531	+	Gal_00001	134666	3.56575	DnaA
Rhodobacterales	Phaeobacter gallaeciensis DSM 26640	GCA_000511385.1	AHD07863.1	Signal transduction histidine kinase	CP006966.1	64649	66943	-	Gal_00060	199211	5.2748	DivL
Rhodobacterales	Phaeobacter gallaeciensis DSM 26640	GCA_000511385.1	AHD09601.1	Uncharacterized protein in bacteria	CP006966.1	1869170	1869766	+	Gal_01846	2003732	53.0558	ChpT
Rhodobacterales	Phaeobacter gallaeciensis DSM 26640	GCA_000511385.1	AHD11318.1	PAS fold protein	CP006966.1	3663393	3664961	-	Gal_03604	21302	0.564044	DivL
Rhodobacterales	Phaeobacter gallaeciensis DSM 26640	GCA_000511385.1	AHD11135.1	DNA modification methylase	CP006966.1	3473816	3474919	-	Gal_03416	3608378	95.5443	CcrM
Rhodobacterales	Phaeobacter gallaeciensis DSM 26640	GCA_000511385.1	AHD08740.1	Uncharacterized protein in bacteria	CP006966.1	978489	979097	-	Gal_00966	1113051	29.4719	GcrA
Rhodobacterales	Phaeobacter gallaeciensis DSM 26640	GCA_000511385.1	AHD09631.1	His Kinase A domain protein/Response regulator receiver domain protein/Histidine kinase	CP006966.1	1897025	1899340	-	Gal_01877	2031587	53.7933	CckA
Rhodobacterales	Phaeobacter gallaeciensis DSM 26640	GCA_000511385.1	AHD07837.1	PAS/PAC sensor hybrid histidine kinase	CP006966.1	35015	37279	+	Gal_00034	169577	4.49014	DivL
Rhodobacterales	Phaeobacter gallaeciensis DSM 26640	GCA_000511385.1	AHD09719.1	Response regulator	CP006966.1	1994979	1995698	-	Gal_01967	2129541	56.387	CtrA
Rhodobacterales	Phaeobacter gallaeciensis DSM 26640	GCA_000511385.1	AHD09900.1	endopeptidase Clp ATP-binding protein regulatory subunit (clpX)	CP006966.1	2183583	2184851	-	Gal_02152	2318145	61.3809	ClpX
Rhodobacterales	Phaeobacter gallaeciensis DSM 26640	GCA_000511385.1	AHD11289.1	ParB/RepB/Spo0J family partition protein	CP006966.1	3634690	3635583	-	Gal_03575	3769252	99.804	ParB
Rhodobacterales	Phaeobacter gallaeciensis DSM 26640	GCA_000511385.1	AHD11290.1	ATPase involved in chromosome partitioning	CP006966.1	3635604	3636413	-	Gal_03576	3770166	99.8282	ParA
Rhodobacterales	Phaeobacter inhibens 2.10	GCA_000154745.2	AFO89289.1	chromosome partitioning protein ParA	CP002972.1	3616910	3617710	-	PGA2_c33280	3751788	99.8274	ParA
Rhodobacterales	Phaeobacter inhibens 2.10	GCA_000154745.2	AFO87429.1	cell cycle response regulator	CP002972.1	1571144	1571863	+	PGA2_c14250	1706022	45.3938	CtrA
Rhodobacterales	Phaeobacter inhibens 2.10	GCA_000154745.2	AFO88218.1	cell cycle regulator GcrA	CP002972.1	2465795	2466451	+	PGA2_c22290	2600673	69.1986	GcrA
Rhodobacterales	Phaeobacter inhibens 2.10	GCA_000154745.2	AFO87516.1	two-component system histidine kinase / response regulator	CP002972.1	1672834	1675149	+	PGA2_c15130	1807712	48.0995	CckA
Rhodobacterales	Phaeobacter inhibens 2.10	GCA_000154745.2	AFO89146.1	modification methylase BabI	CP002972.1	3457146	3458249	-	PGA2_c31830	3592024	95.5764	CcrM
Rhodobacterales	Phaeobacter inhibens 2.10	GCA_000154745.2	AFO86107.1	signal transduction histidine kinase	CP002972.1	88701	90995	-	PGA2_c00820	223579	5.94898	DivL
Rhodobacterales	Phaeobacter inhibens 2.10	GCA_000154745.2	AFO86081.1	signal transduction histidine kinase	CP002972.1	59461	61725	+	PGA2_c00560	194339	5.17096	DivL
Rhodobacterales	Phaeobacter inhibens 2.10	GCA_000154745.2	AFO89317.1	PAS -like protein	CP002972.1	3644699	3646249	-	PGA2_c33560	21303	0.566829	DivL
Rhodobacterales	Phaeobacter inhibens 2.10	GCA_000154745.2	AFO87544.1	hypothetical protein	CP002972.1	1702450	1703046	-	PGA2_c15420	1837328	48.8875	ChpT
Rhodobacterales	Phaeobacter inhibens 2.10	GCA_000154745.2	AFO86032.1	chromosomal replication initiator protein DnaA	CP002972.1	101	1528	+	PGA2_c00010	134979	3.59152	DnaA
Rhodobacterales	Phaeobacter inhibens 2.10	GCA_000154745.2	AFO87258.1	ATP-dependent Clp protease ATP-binding subunit ClpX	CP002972.1	1381445	1382713	+	PGA2_c12510	1516323	40.3463	ClpX
Rhodobacterales	Phaeobacter inhibens 2.10	GCA_000154745.2	AFO89288.1	chromosome-partitioning protein ParB	CP002972.1	3615996	3616889	-	PGA2_c33270	3750874	99.8031	ParB
Rhodobacterales	Phaeobacter piscinae	GCA_002407245.1	ATG40291.1	cell cycle regulator GcrA	CP010681.1	2337160	2337768	+	PhaeoP14_02212	2472140	68.5338	GcrA
Rhodobacterales	Phaeobacter piscinae	GCA_002407245.1	ATG38169.1	signal transduction histidine kinase	CP010681.1	34743	37007	+	PhaeoP14_00034	169723	4.70514	DivL
Rhodobacterales	Phaeobacter piscinae	GCA_002407245.1	ATG41196.1	modification methylase BabI	CP010681.1	3298402	3299505	-	PhaeoP14_03155	3433382	95.1819	CcrM
Rhodobacterales	Phaeobacter piscinae	GCA_002407245.1	ATG38195.1	signal transduction histidine kinase	CP010681.1	64157	66451	-	PhaeoP14_00060	199137	5.52057	DivL
Rhodobacterales	Phaeobacter piscinae	GCA_002407245.1	ATG39445.1	cell cycle response regulator	CP010681.1	1425504	1426223	+	PhaeoP14_01339	1560484	43.2605	CtrA
Rhodobacterales	Phaeobacter piscinae	GCA_002407245.1	ATG39533.1	two-component system histidine kinase / response regulator	CP010681.1	1522063	1524378	+	PhaeoP14_01428	1657043	45.9373	CckA
Rhodobacterales	Phaeobacter piscinae	GCA_002407245.1	ATG41353.1	chromosome partitioning protein ParB	CP010681.1	3464801	3465694	-	PhaeoP14_03316	3599781	99.7949	ParB
Rhodobacterales	Phaeobacter piscinae	GCA_002407245.1	ATG41382.1	PAS fold protein	CP010681.1	3493507	3495075	-	PhaeoP14_03345	21306	0.590655	DivL
Rhodobacterales	Phaeobacter piscinae	GCA_002407245.1	ATG41354.1	ATPase involved in chromosome partitioning	CP010681.1	3465715	3466524	-	PhaeoP14_03317	3600695	99.8202	ParA
Rhodobacterales	Phaeobacter piscinae	GCA_002407245.1	ATG39564.1	putative protein in bacteria	CP010681.1	1556126	1556722	-	PhaeoP14_01460	1691106	46.8817	ChpT
Rhodobacterales	Phaeobacter piscinae	GCA_002407245.1	ATG39284.1	ATP-dependent Clp protease ATP-binding subunit ClpX	CP010681.1	1256633	1257901	+	PhaeoP14_01172	1391613	38.579	ClpX
Rhodobacterales	Phaeobacter piscinae	GCA_002407245.1	ATG38142.1	chromosomal replication initiator protein DnaA	CP010681.1	1	1428	+	PhaeoP14_00001	134981	3.74201	DnaA
Rhodobacterales	Phaeobacter sp. LSS9	GCA_003443595.1	AXT33894.1	ATP-dependent Clp protease ATP-binding subunit ClpX	CP031956.1	467575	468843	+	D1820_02295	1511270	41.382	ClpX
Rhodobacterales	Phaeobacter sp. LSS9	GCA_003443595.1	AXT35733.1	ParA family protein	CP031956.1	2601820	2602629	-	D1820_12510	3645515	99.8224	ParA
Rhodobacterales	Phaeobacter sp. LSS9	GCA_003443595.1	AXT34134.1	response regulator	CP031956.1	738164	740479	+	D1820_03605	1781859	48.7913	CckA
Rhodobacterales	Phaeobacter sp. LSS9	GCA_003443595.1	AXT34161.1	histidine phosphotransferase	CP031956.1	767872	768468	-	D1820_03755	1811567	49.6048	ChpT
Rhodobacterales	Phaeobacter sp. LSS9	GCA_003443595.1	AXT35732.1	ParB/RepB/Spo0J family partition protein	CP031956.1	2600906	2601799	-	D1820_12505	3644601	99.7974	ParB
Rhodobacterales	Phaeobacter sp. LSS9	GCA_003443595.1	AXT35759.1	diguanylate cyclase	CP031956.1	2629614	2631164	-	D1820_12650	21308	0.583461	DivL
Rhodobacterales	Phaeobacter sp. LSS9	GCA_003443595.1	AXT34054.1	DNA-binding response regulator	CP031956.1	642315	643034	+	D1820_03170	1686010	46.1667	CtrA
Rhodobacterales	Phaeobacter sp. LSS9	GCA_003443595.1	AXT35894.1	response regulator	CP031956.1	2801259	2803523	+	D1820_13450	192953	5.28349	DivL
Rhodobacterales	Phaeobacter sp. LSS9	GCA_003443595.1	AXT35862.1	chromosomal replication initiator protein DnaA	CP031956.1	2756227	2757654	+	D1820_13240	147921	4.05041	DnaA
Rhodobacterales	Phaeobacter sp. LSS9	GCA_003443595.1	AXT34746.1	GcrA cell cycle regulator	CP031956.1	1474429	1475037	+	D1820_07025	2518124	68.9519	GcrA
Rhodobacterales	Phaeobacter sp. LSS9	GCA_003443595.1	AXT35560.1	site-specific DNA-methyltransferase	CP031956.1	2401710	2402813	-	D1820_11570	3445405	94.3429	CcrM
Rhodobacterales	Planktomarina temperata RCA23	GCA_000738435.1	AII88553.1	chromosome-partitioning protein ParB	CP003984.1	3227913	3228749	+	RCA23_c30530	6869	0.208903	ParB
Rhodobacterales	Planktomarina temperata RCA23	GCA_000738435.1	AII85574.1	chromosomal replication initiatior protein DnaA	CP003984.1	101	1447	+	RCA23_c00010	67179	2.04308	DnaA
Rhodobacterales	Planktomarina temperata RCA23	GCA_000738435.1	AII85752.1	GcrA cell cycle regulator	CP003984.1	203125	203697	-	RCA23_c01870	270203	8.21755	GcrA
Rhodobacterales	Planktomarina temperata RCA23	GCA_000738435.1	AII85946.1	ATP-dependent Clp protease ATP-binding subunit ClpX	CP003984.1	407812	409077	+	RCA23_c03840	474890	14.4426	ClpX
Rhodobacterales	Planktomarina temperata RCA23	GCA_000738435.1	AII86825.1	hypothetical protein	CP003984.1	1388243	1388851	-	RCA23_c12800	1455321	44.2599	ChpT
Rhodobacterales	Planktomarina temperata RCA23	GCA_000738435.1	AII88552.1	chromosome-partitioning protein ParA	CP003984.1	3227063	3227839	+	RCA23_c30520	6019	0.183053	ParA
Rhodobacterales	Planktomarina temperata RCA23	GCA_000738435.1	AII85620.1	modification methylase CcrM	CP003984.1	50654	51766	-	RCA23_c00470	117732	3.58052	CcrM
Rhodobacterales	Planktomarina temperata RCA23	GCA_000738435.1	AII87069.1	cell cycle transcriptional regulator	CP003984.1	1646802	1647515	+	RCA23_c15310	1713880	52.1234	CtrA
Rhodobacterales	Rhodobaca barguzinensis	GCA_001870665.2	ATX66271.1	DNA-binding response regulator	CP024899.1	2294510	2295226	+	BG454_10985	1948635	49.9724	CtrA
Rhodobacterales	Rhodobaca barguzinensis	GCA_001870665.2	ATX67662.1	site-specific DNA-methyltransferase	CP024899.1	831735	832838	+	BG454_03935	485860	12.4598	CcrM
Rhodobacterales	Rhodobaca barguzinensis	GCA_001870665.2	ATX65945.1	GcrA cell cycle regulator	CP024899.1	1880716	1881396	+	BG454_08995	1534841	39.3608	GcrA
Rhodobacterales	Rhodobaca barguzinensis	GCA_001870665.2	ATX66786.1	histidine phosphotransferase	CP024899.1	2870380	2871036	+	BG454_13950	2524505	64.7405	ChpT
Rhodobacterales	Rhodobaca barguzinensis	GCA_001870665.2	ATX65980.1	ATP-dependent Clp protease ATP-binding subunit ClpX	CP024899.1	1931764	1933026	-	BG454_09240	1585889	40.6699	ClpX
Rhodobacterales	Rhodobaca barguzinensis	GCA_001870665.2	ATX67367.1	hybrid sensor histidine kinase/response regulator	CP024899.1	3601594	3603798	+	BG454_17395	3255719	83.4924	DivL
Rhodobacterales	Rhodobaca barguzinensis	GCA_001870665.2	ATX64702.1	chromosome partitioning protein ParA	CP024899.1	351885	352691	+	BG454_01700	6010	0.154126	ParA
Rhodobacterales	Rhodobaca barguzinensis	GCA_001870665.2	ATX67323.1	hypothetical protein	CP024899.1	3545804	3547501	+	BG454_17140	3199929	82.0617	DivL
Rhodobacterales	Rhodobaca barguzinensis	GCA_001870665.2	ATX64703.1	chromosome partitioning protein ParB	CP024899.1	352688	353566	+	BG454_01705	6813	0.174718	ParB
Rhodobacterales	Rhodobaca barguzinensis	GCA_001870665.2	ATX64411.1	chromosomal replication initiator protein DnaA	CP024899.1	1	1353	+	BG454_00005	3553545	91.1301	DnaA
Rhodobacterales	Rhodobaca barguzinensis	GCA_001870665.2	ATX65916.1	hybrid sensor histidine kinase/response regulator	CP024899.1	1841841	1844195	-	BG454_08810	1495966	38.3638	CckA
Rhodobacterales	Rhodobacter blasticus	GCA_003071405.1	AWD22119.1	chromosome partitioning protein ParB	CP020470.1	2231234	2232112	-	B6K69_10880	3541601	99.793	ParB
Rhodobacterales	Rhodobacter blasticus	GCA_003071405.1	AWD23340.1	GcrA cell cycle regulator	CP020470.1	1253324	1253947	-	B6K69_06070	2563691	72.2381	GcrA
Rhodobacterales	Rhodobacter blasticus	GCA_003071405.1	AWD20641.1	hybrid sensor histidine kinase/response regulator	CP020470.1	490967	493309	-	B6K69_02375	1801334	50.7568	CckA
Rhodobacterales	Rhodobacter blasticus	GCA_003071405.1	AWD22210.1	hybrid sensor histidine kinase/response regulator	CP020470.1	2339418	2341985	-	B6K69_11405	100837	2.84132	DivL
Rhodobacterales	Rhodobacter blasticus	GCA_003071405.1	AWD21893.1	modification methylase	CP020470.1	1956926	1958047	+	B6K69_09535	3267293	92.0637	CcrM
Rhodobacterales	Rhodobacter blasticus	GCA_003071405.1	AWD23458.1	chromosome partitioning protein ParA	CP020470.1	2232132	2232929	-	B6K69_10885	3542499	99.8183	ParA
Rhodobacterales	Rhodobacter blasticus	GCA_003071405.1	AWD20249.1	histidine phosphotransferase	CP020470.1	16083	16682	-	B6K69_00085	1326450	37.3759	ChpT
Rhodobacterales	Rhodobacter blasticus	GCA_003071405.1	AWD20981.1	ATP-dependent protease ATP-binding subunit ClpX	CP020470.1	889878	891140	-	B6K69_04265	2200245	61.9971	ClpX
Rhodobacterales	Rhodobacter blasticus	GCA_003071405.1	AWD20768.1	DNA-binding response regulator	CP020470.1	644078	644797	-	B6K69_03075	1954445	55.0711	CtrA
Rhodobacterales	Rhodobacter blasticus	GCA_003071405.1	AWD21960.1	chromosomal replication initiation protein DnaA	CP020470.1	2049084	2050442	-	B6K69_09965	3359451	94.6605	DnaA
Rhodobacterales	Rhodobacter blasticus	GCA_003071405.1	AWD22020.1	hypothetical protein	CP020470.1	2111979	2113538	-	B6K69_10305	3422346	96.4327	DivL
Rhodobacterales	Rhodobacter capsulatus SB 1003	GCA_000021865.1	ADE83766.1	chromosomal replication initiator protein DnaA	CP001312.1	351	1724	+	RCAP_rcc00001	3662720	97.961	DnaA
Rhodobacterales	Rhodobacter capsulatus SB 1003	GCA_000021865.1	ADE86727.1	conserved hypothetical protein	CP001312.1	3188782	3189414	+	RCAP_rcc03000	3112193	83.2369	ChpT
Rhodobacterales	Rhodobacter capsulatus SB 1003	GCA_000021865.1	ADE86338.1	ATP-dependent Clp protease%2C ATP-binding subunit ClpX	CP001312.1	2795100	2796374	-	RCAP_rcc02608	2718511	72.7077	ClpX
Rhodobacterales	Rhodobacter capsulatus SB 1003	GCA_000021865.1	ADE85494.1	signal transduction histidine kinase	CP001312.1	1889352	1891655	+	RCAP_rcc01749	1812763	48.4831	CckA
Rhodobacterales	Rhodobacter capsulatus SB 1003	GCA_000021865.1	ADE83966.1	site-specific DNA-methyltransferase (adenine-specific)	CP001312.1	235782	236885	-	RCAP_rcc00201	159193	4.25768	CcrM
Rhodobacterales	Rhodobacter capsulatus SB 1003	GCA_000021865.1	ADE83825.1	chromosome-partitioning protein ParB	CP001312.1	69190	70092	-	RCAP_rcc00060	3731559	99.8021	ParB
Rhodobacterales	Rhodobacter capsulatus SB 1003	GCA_000021865.1	ADE83826.1	chromosome-partitioning protein ParA	CP001312.1	70089	70910	-	RCAP_rcc00061	3732458	99.8262	ParA
Rhodobacterales	Rhodobacter capsulatus SB 1003	GCA_000021865.1	ADE85408.1	cell cycle transcriptional regulator CtrA	CP001312.1	1800841	1801554	+	RCAP_rcc01663	1724252	46.1158	CtrA
Rhodobacterales	Rhodobacter capsulatus SB 1003	GCA_000021865.1	ADE83807.1	PAS/PAC sensor domain protein	CP001312.1	51052	52659	-	RCAP_rcc00042	3713421	99.317	DivL
Rhodobacterales	Rhodobacter capsulatus SB 1003	GCA_000021865.1	ADE87176.1	sensor histidine kinase/response regulator receiver protein	CP001312.1	3661150	3663381	+	RCAP_rcc03452	3584561	95.8706	DivL
Rhodobacterales	Rhodobacter sphaeroides ATCC 17029	GCA_000015985.1	ABN75830.1	GcrA cell cycle regulator	CP000577.1	729743	730366	-	Rsph17029_0717	825438	26.2234	GcrA
Rhodobacterales	Rhodobacter sphaeroides ATCC 17029	GCA_000015985.1	ABN75131.1	chromosomal replication initiator protein DnaA	CP000577.1	9930	11297	+	Rsph17029_0011	105625	3.3556	DnaA
Rhodobacterales	Rhodobacter sphaeroides ATCC 17029	GCA_000015985.1	ABN77990.1	chromosome segregation ATPase	CP000577.1	3045495	3046319	-	Rsph17029_2888	3141190	99.7925	ParA
Rhodobacterales	Rhodobacter sphaeroides ATCC 17029	GCA_000015985.1	ABN77210.1	multi-sensor hybrid histidine kinase	CP000577.1	2231385	2233697	-	Rsph17029_2107	2327080	73.929	CckA
Rhodobacterales	Rhodobacter sphaeroides ATCC 17029	GCA_000015985.1	ABN76936.1	ATP-dependent Clp protease%2C ATP-binding subunit ClpX	CP000577.1	1927275	1928540	-	Rsph17029_1829	2022970	64.2678	ClpX
Rhodobacterales	Rhodobacter sphaeroides ATCC 17029	GCA_000015985.1	ABN75239.1	DNA methylase N-4/N-6 domain protein	CP000577.1	134469	135587	-	Rsph17029_0119	230164	7.31208	CcrM
Rhodobacterales	Rhodobacter sphaeroides ATCC 17029	GCA_000015985.1	ABN77989.1	chromosome segregation DNA-binding protein	CP000577.1	3044593	3045483	-	Rsph17029_2887	3140288	99.7639	ParB
Rhodobacterales	Rhodobacter sphaeroides ATCC 17029	GCA_000015985.1	ABN75292.1	hypothetical protein	CP000577.1	187665	189227	+	Rsph17029_0173	283360	9.00207	DivL
Rhodobacterales	Rhodobacter sphaeroides ATCC 17029	GCA_000015985.1	ABN76389.1	two component transcriptional regulator%2C winged helix family	CP000577.1	1321994	1322707	+	Rsph17029_1279	1417689	45.0386	CtrA
Rhodobacterales	Rhodobacter sphaeroides ATCC 17029	GCA_000015985.1	ABN75145.1	histidine kinase	CP000577.1	32793	35342	+	Rsph17029_0025	128488	4.08194	DivL
Rhodobacterales	Rhodobacteraceae bacterium	GCA_002850435.1	AUJ63100.1	GcrA cell cycle regulator	CP021114.1	304255	304851	-	B9057_01630	367894	12.9672	GcrA
Rhodobacterales	Rhodobacteraceae bacterium	GCA_002850435.1	AUJ65288.1	chromosome partitioning protein ParB	CP021114.1	2766112	2767014	-	B9057_13805	2829751	99.7409	ParB
Rhodobacterales	Rhodobacteraceae bacterium	GCA_002850435.1	AUJ65160.1	modification methylase	CP021114.1	2617551	2618654	+	B9057_13085	2681190	94.5045	CcrM
Rhodobacterales	Rhodobacteraceae bacterium	GCA_002850435.1	AUJ64027.1	hypothetical protein	CP021114.1	1351330	1351911	-	B9057_06755	1414969	49.8737	ChpT
Rhodobacterales	Rhodobacteraceae bacterium	GCA_002850435.1	AUJ64646.1	ATP-dependent protease ATP-binding subunit ClpX	CP021114.1	2051061	2052329	-	B9057_10180	2114700	74.5373	ClpX
Rhodobacterales	Rhodobacteraceae bacterium	GCA_002850435.1	AUJ65289.1	chromosome partitioning protein ParA	CP021114.1	2767025	2767825	-	B9057_13810	2830664	99.7731	ParA
Rhodobacterales	Rhodobacteraceae bacterium	GCA_002850435.1	AUJ63999.1	DNA-binding response regulator	CP021114.1	1316895	1317608	+	B9057_06595	1380534	48.66	CtrA
Rhodobacterales	Rhodobacteraceae bacterium	GCA_002850435.1	AUJ65310.1	hypothetical protein	CP021114.1	2791147	2792715	-	B9057_13930	17684	0.623312	DivL
Rhodobacterales	Rhodobacteraceae bacterium	GCA_002850435.1	AUJ62809.1	chromosomal replication initiation protein DnaA	CP021114.1	206	1561	+	B9057_00005	63845	2.25036	DnaA
Rhodobacterales	Rhodobacteraceae bacterium SH-1	GCA_003008555.1	AVO37847.1	chromosome partitioning protein ParB	CP027665.1	1842427	1843311	+	C6Y53_09140	142263	3.65514	ParB
Rhodobacterales	Rhodobacteraceae bacterium SH-1	GCA_003008555.1	AVO38732.1	GcrA cell cycle regulator	CP027665.1	2888950	2889525	-	C6Y53_14205	1188786	30.5433	GcrA
Rhodobacterales	Rhodobacteraceae bacterium SH-1	GCA_003008555.1	AVO39863.1	hybrid sensor histidine kinase/response regulator	CP027665.1	3501595	3503811	+	C6Y53_17045	1801431	46.2838	CckA
Rhodobacterales	Rhodobacteraceae bacterium SH-1	GCA_003008555.1	AVO36334.1	ATP-dependent Clp protease ATP-binding subunit ClpX	CP027665.1	92644	93912	+	C6Y53_00490	2284618	58.6983	ClpX
Rhodobacterales	Rhodobacteraceae bacterium SH-1	GCA_003008555.1	AVO37181.1	modification methylase	CP027665.1	1072582	1073688	+	C6Y53_05315	3264556	83.8756	CcrM
Rhodobacterales	Rhodobacteraceae bacterium SH-1	GCA_003008555.1	AVO37846.1	chromosome partitioning protein ParA	CP027665.1	1841596	1842405	+	C6Y53_09135	141432	3.63379	ParA
Rhodobacterales	Rhodobacteraceae bacterium SH-1	GCA_003008555.1	AVO39487.1	histidine phosphotransferase	CP027665.1	3827864	3828463	+	C6Y53_18495	2127700	54.6666	ChpT
Rhodobacterales	Rhodobacteraceae bacterium SH-1	GCA_003008555.1	AVO37724.1	chromosomal replication initiator protein DnaA	CP027665.1	1686381	1687745	+	C6Y53_08400	3878355	99.6459	DnaA
Rhodobacterales	Rhodobacteraceae bacterium SH-1	GCA_003008555.1	AVO38953.1	hybrid sensor histidine kinase/response regulator	CP027665.1	3138324	3140663	-	C6Y53_15390	1438160	36.9504	DivL
Rhodobacterales	Rhodobacteraceae bacterium SH-1	GCA_003008555.1	AVO38768.1	diguanylate cyclase	CP027665.1	2937071	2938612	+	C6Y53_14410	1236907	31.7796	DivL
Rhodobacterales	Rhodobacteraceae bacterium SH-1	GCA_003008555.1	AVO39186.1	DNA-binding response regulator	CP027665.1	3431678	3432397	+	C6Y53_16680	1731514	44.4875	CtrA
Rhodobacterales	Rhodovulum sulfidophilum	GCA_001548075.1	BAQ71189.1	putative PAS/PAC sensor protein	AP014800.1	4189489	4191036	-	NHU_04066	20180	0.453032	DivL
Rhodobacterales	Rhodovulum sulfidophilum	GCA_001548075.1	BAQ68371.1	ATP-dependent protease ATP-binding subunit ClpX	AP014800.1	1267815	1269080	+	NHU_01211	1552938	34.8628	ClpX
Rhodobacterales	Rhodovulum sulfidophilum	GCA_001548075.1	BAQ71163.1	chromosome partitioning protein ParA	AP014800.1	4162833	4163642	-	NHU_04040	4447956	99.8546	ParA
Rhodobacterales	Rhodovulum sulfidophilum	GCA_001548075.1	BAQ69560.1	multi-sensor hybrid histidine kinase	AP014800.1	2515681	2518014	-	NHU_02409	2800804	62.8768	CckA
Rhodobacterales	Rhodovulum sulfidophilum	GCA_001548075.1	BAQ69931.1	GcrA cell cycle regulator	AP014800.1	2906253	2906897	+	NHU_02784	3191376	71.645	GcrA
Rhodobacterales	Rhodovulum sulfidophilum	GCA_001548075.1	BAQ69231.1	two component transcriptional regulator	AP014800.1	2175618	2176280	-	NHU_02077	2460741	55.2425	CtrA
Rhodobacterales	Rhodovulum sulfidophilum	GCA_001548075.1	BAQ71162.1	parB-like partition protein	AP014800.1	4161908	4162813	-	NHU_04039	4447031	99.8339	ParB
Rhodobacterales	Rhodovulum sulfidophilum	GCA_001548075.1	BAQ69683.1	hypothetical protein	AP014800.1	2651710	2652315	+	NHU_02532	2936833	65.9306	ChpT
Rhodobacterales	Rhodovulum sulfidophilum	GCA_001548075.1	BAQ71416.1	histidine kinase	AP014800.1	4402765	4405320	+	NHU_04303	233456	5.24098	DivL
Rhodobacterales	Rhodovulum sulfidophilum	GCA_001548075.1	BAQ70737.1	chromosomal replication initiation protein	AP014800.1	3731055	3732392	+	NHU_03605	4016178	90.1614	DnaA
Rhodobacterales	Rhodovulum sulfidophilum	GCA_001548075.1	BAQ67257.1	modification methylase BabI	AP014800.1	57961	59055	+	NHU_00086	343084	7.70208	CcrM
Rhodobacterales	Roseobacter denitrificans OCh 114	GCA_000014045.1	ABG32204.1	conserved hypothetical protein	CP000362.1	2535768	2536364	+	RD1_2657	2108723	51.0204	ChpT
Rhodobacterales	Roseobacter denitrificans OCh 114	GCA_000014045.1	ABG32383.1	ATP-dependent Clp protease%2C ATP-binding subunit ClpX	CP000362.1	2725435	2726700	-	RD1_2857	2298390	55.6094	ClpX
Rhodobacterales	Roseobacter denitrificans OCh 114	GCA_000014045.1	ABG30078.1	hybrid sensory histidine kinase%2C putative	CP000362.1	350567	352768	+	RD1_0357	4056619	98.1496	DivL
Rhodobacterales	Roseobacter denitrificans OCh 114	GCA_000014045.1	ABG29937.1	chromosomal replication initiator protein DnaA	CP000362.1	204958	206322	+	RD1_0208	3911010	94.6266	DnaA
Rhodobacterales	Roseobacter denitrificans OCh 114	GCA_000014045.1	ABG32250.1	sensor kinase-like protein%2C putative	CP000362.1	2581628	2583958	-	RD1_2711	2154583	52.13	CckA
Rhodobacterales	Roseobacter denitrificans OCh 114	GCA_000014045.1	ABG31299.1	conserved hypothetical protein	CP000362.1	1610609	1611172	-	RD1_1675	1183564	28.6363	GcrA
Rhodobacterales	Roseobacter denitrificans OCh 114	GCA_000014045.1	ABG30144.1	chromosome partitioning protein parB	CP000362.1	419660	420556	-	RD1_0429	4125712	99.8213	ParB
Rhodobacterales	Roseobacter denitrificans OCh 114	GCA_000014045.1	ABG32152.1	transcriptional regulator CtrA	CP000362.1	2483764	2484483	+	RD1_2601	2056719	49.7622	CtrA
Rhodobacterales	Roseobacter denitrificans OCh 114	GCA_000014045.1	ABG30145.1	chromosome partitioning protein ParA	CP000362.1	420566	421375	-	RD1_0430	4126618	99.8432	ParA
Rhodobacterales	Roseobacter denitrificans OCh 114	GCA_000014045.1	ABG30170.1	conserved domain protein	CP000362.1	445966	447444	-	RD1_0457	18921	0.457792	DivL
Rhodobacterales	Roseobacter denitrificans OCh 114	GCA_000014045.1	ABG30023.1	modification methylase	CP000362.1	289727	290821	-	RD1_0298	3995779	96.6776	CcrM
Rhodobacterales	Roseobacter litoralis Och 149	GCA_000154785.2	AEI96067.1	chromosome-partitioning protein ParA	CP002623.1	4217035	4217844	+	RLO149_c041710	6117	0.135776	ParA
Rhodobacterales	Roseobacter litoralis Och 149	GCA_000154785.2	AEI96042.1	hypothetical protein	CP002623.1	4189980	4191527	+	RLO149_c041460	4484273	99.5352	DivL
Rhodobacterales	Roseobacter litoralis Och 149	GCA_000154785.2	AEI96136.1	sensor transduction histidine kinase	CP002623.1	4288939	4291197	-	RLO149_c042400	78021	1.73179	DivL
Rhodobacterales	Roseobacter litoralis Och 149	GCA_000154785.2	AEI93943.1	cell cycle transcriptional regulator	CP002623.1	2008325	2009044	-	RLO149_c019570	2302618	51.1101	CtrA
Rhodobacterales	Roseobacter litoralis Och 149	GCA_000154785.2	AEI93579.1	ATP-dependent Clp protease ATP-binding subunit ClpX	CP002623.1	1636462	1637727	+	RLO149_c015840	1930755	42.856	ClpX
Rhodobacterales	Roseobacter litoralis Och 149	GCA_000154785.2	AEI93828.1	sensor transduction histidine kinase	CP002623.1	1892392	1894689	+	RLO149_c018390	2186685	48.5368	CckA
Rhodobacterales	Roseobacter litoralis Och 149	GCA_000154785.2	AEI96068.1	chromosome-partitioning protein ParB	CP002623.1	4217854	4218747	+	RLO149_c041720	6936	0.153955	ParB
Rhodobacterales	Roseobacter litoralis Och 149	GCA_000154785.2	AEI92035.1	chromosomal replication initiatior protein DnaA	CP002623.1	101	1465	+	RLO149_c000010	294394	6.53452	DnaA
Rhodobacterales	Roseobacter litoralis Och 149	GCA_000154785.2	AEI94993.1	GcrA cell cycle regulator	CP002623.1	3096773	3097336	+	RLO149_c030370	3391066	75.2699	GcrA
Rhodobacterales	Roseobacter litoralis Och 149	GCA_000154785.2	AEI96183.1	modification methylase CcrM	CP002623.1	4342812	4343906	+	RLO149_c042870	131894	2.92759	CcrM
Rhodobacterales	Roseobacter litoralis Och 149	GCA_000154785.2	AEI93891.1	hypothetical protein	CP002623.1	1956876	1957472	-	RLO149_c019050	2251169	49.9681	ChpT
Rhodobacterales	Ruegeria pomeroyi DSS-3	GCA_000011965.2	AAV93477.1	chromosomal replication initiator protein DnaA	CP000031.2	164331	165737	+	SPO0149	167919	4.08618	DnaA
Rhodobacterales	Ruegeria pomeroyi DSS-3	GCA_000011965.2	AAV95258.1	hypothetical protein	CP000031.2	2111189	2111785	+	SPO1983	2114777	51.4615	ChpT
Rhodobacterales	Ruegeria pomeroyi DSS-3	GCA_000011965.2	AAV94308.2	ATP-dependent Clp protease%2C ATP-binding subunit ClpX	CP000031.2	1056092	1057360	+	SPO1004	1059680	25.7865	ClpX
Rhodobacterales	Ruegeria pomeroyi DSS-3	GCA_000011965.2	AAV93425.1	sensory box sensor histidine kinase/response regulator	CP000031.2	93264	95495	+	SPO0094	96852	2.35682	DivL
Rhodobacterales	Ruegeria pomeroyi DSS-3	GCA_000011965.2	AAV94964.1	DNA-binding response regulator CtrA	CP000031.2	1785340	1786056	+	SPO1679	1788928	43.5322	CtrA
Rhodobacterales	Ruegeria pomeroyi DSS-3	GCA_000011965.2	AAV97082.1	hypothetical protein	CP000031.2	4081063	4082565	+	SPO3868	4084651	99.3969	DivL
Rhodobacterales	Ruegeria pomeroyi DSS-3	GCA_000011965.2	AAV95308.1	sensory box sensor histidine kianse/response regulator	CP000031.2	2163582	2165888	-	SPO2036	2167170	52.7364	CckA
Rhodobacterales	Ruegeria pomeroyi DSS-3	GCA_000011965.2	AAV94261.1	hypothetical protein	CP000031.2	1008221	1008817	-	SPO0956	1011809	24.6216	GcrA
Rhodobacterales	Ruegeria pomeroyi DSS-3	GCA_000011965.2	AAV93335.1	chromosome partitioning protein parB	CP000031.2	3299	4189	+	SPO0004	6887	0.16759	ParB
Rhodobacterales	Ruegeria pomeroyi DSS-3	GCA_000011965.2	AAV93334.1	chromosome partitioning protein ParA	CP000031.2	2473	3276	+	SPO0003	6061	0.14749	ParA
Rhodobacterales	Ruegeria pomeroyi DSS-3	GCA_000011965.2	AAV96677.1	modification methylase	CP000031.2	3654991	3656094	-	SPO3451	3658579	89.0287	CcrM
Rhodobacterales	Sulfitobacter pseudonitzschiae	GCA_002222635.1	ASM71287.1	GcrA cell cycle regulator	CP022415.1	487819	488406	-	SULPSESMR1_00452	861924	24.127	GcrA
Rhodobacterales	Sulfitobacter pseudonitzschiae	GCA_002222635.1	ASM74078.1	signal transduction histidine-protein kinase BarA	CP022415.1	3311924	3314101	-	SULPSESMR1_03302	113584	3.17945	DivL
Rhodobacterales	Sulfitobacter pseudonitzschiae	GCA_002222635.1	ASM73774.1	modification methylase DpnIIB	CP022415.1	2998210	2999310	-	SULPSESMR1_02993	3372315	94.398	CcrM
Rhodobacterales	Sulfitobacter pseudonitzschiae	GCA_002222635.1	ASM74010.1	chromosomal replication initiator protein DnaA	CP022415.1	3242100	3243455	-	SULPSESMR1_03233	43760	1.22493	DnaA
Rhodobacterales	Sulfitobacter pseudonitzschiae	GCA_002222635.1	ASM73960.1	chromosome partitioning protein ParA	CP022415.1	3191885	3192700	-	SULPSESMR1_03183	3565990	99.8193	ParA
Rhodobacterales	Sulfitobacter pseudonitzschiae	GCA_002222635.1	ASM73989.1	sensor protein DivL	CP022415.1	3221582	3223111	-	SULPSESMR1_03212	23242	0.650591	DivL
Rhodobacterales	Sulfitobacter pseudonitzschiae	GCA_002222635.1	ASM73959.1	chromosome-partitioning protein ParB	CP022415.1	3190990	3191883	-	SULPSESMR1_03182	3565095	99.7943	ParB
Rhodobacterales	Sulfitobacter pseudonitzschiae	GCA_002222635.1	ASM72396.1	sensor kinase CckA	CP022415.1	1607292	1609604	-	SULPSESMR1_01582	1981397	55.4633	CckA
Rhodobacterales	Sulfitobacter pseudonitzschiae	GCA_002222635.1	ASM71781.1	ATP-dependent Clp protease ATP-binding subunit ClpX	CP022415.1	986823	988088	+	SULPSESMR1_00953	1360928	38.0951	ClpX
Rhodobacterales	Sulfitobacter pseudonitzschiae	GCA_002222635.1	ASM72310.1	histidine phosphotransferase	CP022415.1	1522411	1523007	-	SULPSESMR1_01495	1896516	53.0873	ChpT
Rhodobacterales	Sulfitobacter sp. AM1-D1	GCA_001886735.1	APE44879.1	modification methylase	CP018076.1	3450431	3451531	-	BOO69_16810	3589987	93.4842	CcrM
Rhodobacterales	Sulfitobacter sp. AM1-D1	GCA_001886735.1	APE41971.1	chromosomal replication initiation protein DnaA	CP018076.1	104	1465	-	BOO69_00005	139660	3.63678	DnaA
Rhodobacterales	Sulfitobacter sp. AM1-D1	GCA_001886735.1	APE45096.1	chromosome partitioning protein ParA	CP018076.1	3706699	3707499	+	BOO69_18015	6046	0.157439	ParA
Rhodobacterales	Sulfitobacter sp. AM1-D1	GCA_001886735.1	APE44930.1	hybrid sensor histidine kinase/response regulator	CP018076.1	3513043	3515208	+	BOO69_17090	3652599	95.1146	DivL
Rhodobacterales	Sulfitobacter sp. AM1-D1	GCA_001886735.1	APE45097.1	chromosome partitioning protein ParB	CP018076.1	3707509	3708408	+	BOO69_18020	6856	0.178532	ParB
Rhodobacterales	Sulfitobacter sp. AM1-D1	GCA_001886735.1	APE42606.1	GcrA cell cycle regulator	CP018076.1	741460	742032	-	BOO69_03615	881016	22.9419	GcrA
Rhodobacterales	Sulfitobacter sp. AM1-D1	GCA_001886735.1	APE43859.1	ATP-dependent protease ATP-binding subunit ClpX	CP018076.1	2208001	2209266	-	BOO69_10870	2347557	61.131	ClpX
Rhodobacterales	Sulfitobacter sp. AM1-D1	GCA_001886735.1	APE45575.1	hypothetical protein	CP018076.1	3678736	3680214	+	BOO69_17885	3818292	99.4293	DivL
Rhodobacterales	Sulfitobacter sp. AM1-D1	GCA_001886735.1	APE43566.1	DNA-binding response regulator	CP018076.1	1887710	1888417	-	BOO69_09190	2027266	52.7905	CtrA
Rhodobacterales	Sulfitobacter sp. D7	GCA_003611275.1	AYE85977.1	ATP-dependent protease ATP-binding subunit ClpX	CP020694.1	1560148	1561416	+	B5M07_07555	1441611	42.7639	ClpX
Rhodobacterales	Sulfitobacter sp. D7	GCA_003611275.1	AYE84709.1	chromosome partitioning protein ParB	CP020694.1	111192	112091	-	B5M07_00470	3363746	99.7821	ParB
Rhodobacterales	Sulfitobacter sp. D7	GCA_003611275.1	AYE84735.1	hypothetical protein	CP020694.1	141166	142692	-	B5M07_00625	22629	0.671266	DivL
Rhodobacterales	Sulfitobacter sp. D7	GCA_003611275.1	AYE84710.1	chromosome partitioning protein ParA	CP020694.1	112104	112901	-	B5M07_00475	3364658	99.8092	ParA
Rhodobacterales	Sulfitobacter sp. D7	GCA_003611275.1	AYE86292.1	histidine phosphotransferase	CP020694.1	1909365	1909967	+	B5M07_09275	1790828	53.1231	ChpT
Rhodobacterales	Sulfitobacter sp. D7	GCA_003611275.1	AYE85676.1	GcrA cell cycle regulator	CP020694.1	1194362	1194976	-	B5M07_05775	1075825	31.9133	GcrA
Rhodobacterales	Sulfitobacter sp. D7	GCA_003611275.1	AYE86437.1	DNA-binding response regulator	CP020694.1	2084080	2084787	-	B5M07_10095	1965543	58.3058	CtrA
Rhodobacterales	Sulfitobacter sp. D7	GCA_003611275.1	AYE84621.1	chromosomal replication initiation protein DnaA	CP020694.1	101	1462	+	B5M07_00005	3252655	96.4867	DnaA
Rhodobacterales	Sulfitobacter sp. D7	GCA_003611275.1	AYE84963.1	modification methylase	CP020694.1	391103	392203	+	B5M07_01880	272566	8.08539	CcrM
Rhodobacterales	Sulfitobacter sp. JL08	GCA_003352045.1	AXI56593.1	chromosome partitioning protein ParA	CP025815.1	4213255	4214064	-	C1J05_20630	4317188	99.8496	ParA
Rhodobacterales	Sulfitobacter sp. JL08	GCA_003352045.1	AXI54430.1	ATP-dependent Clp protease ATP-binding subunit ClpX	CP025815.1	1603120	1604388	+	C1J05_07925	1707053	39.4814	ClpX
Rhodobacterales	Sulfitobacter sp. JL08	GCA_003352045.1	AXI55827.1	GcrA cell cycle regulator	CP025815.1	3284959	3285522	+	C1J05_16160	3388892	78.3796	GcrA
Rhodobacterales	Sulfitobacter sp. JL08	GCA_003352045.1	AXI56941.1	hybrid sensor histidine kinase/response regulator	CP025815.1	2133086	2135293	-	C1J05_10525	2237019	51.7387	CckA
Rhodobacterales	Sulfitobacter sp. JL08	GCA_003352045.1	AXI56592.1	chromosome partitioning protein ParB	CP025815.1	4212332	4213237	-	C1J05_20625	4316265	99.8283	ParB
Rhodobacterales	Sulfitobacter sp. JL08	GCA_003352045.1	AXI54700.1	DNA-binding response regulator	CP025815.1	1927491	1928207	+	C1J05_09500	2031424	46.9836	CtrA
Rhodobacterales	Sulfitobacter sp. JL08	GCA_003352045.1	AXI54804.1	histidine phosphotransferase	CP025815.1	2052222	2052824	-	C1J05_10115	2156155	49.8684	ChpT
Rhodobacterales	Sulfitobacter sp. JL08	GCA_003352045.1	AXI53114.1	hybrid sensor histidine kinase/response regulator	CP025815.1	20154	22361	-	C1J05_00095	124087	2.86993	DivL
Rhodobacterales	Sulfitobacter sp. JL08	GCA_003352045.1	AXI56616.1	diguanylate cyclase	CP025815.1	4240554	4242113	-	C1J05_20760	20797	0.481001	DivL
Rhodobacterales	Sulfitobacter sp. JL08	GCA_003352045.1	AXI53096.1	chromosomal replication initiator protein DnaA	CP025815.1	1	1353	+	C1J05_00005	103934	2.40383	DnaA
Rhodobacterales	Sulfitobacter sp. JL08	GCA_003352045.1	AXI56406.1	modification methylase	CP025815.1	3977515	3978612	-	C1J05_19530	4081448	94.3973	CcrM
Rhodobacterales	Sulfitobacter sp. SK025	GCA_003352105.1	AXI51026.1	hybrid sensor histidine kinase/response regulator	CP025808.1	1832461	1834746	+	C1J04_08915	1432072	47.1798	CckA
Rhodobacterales	Sulfitobacter sp. SK025	GCA_003352105.1	AXI50859.1	ATP-dependent Clp protease ATP-binding subunit ClpX	CP025808.1	1654103	1655368	+	C1J04_08010	1253714	41.3038	ClpX
Rhodobacterales	Sulfitobacter sp. SK025	GCA_003352105.1	AXI49741.1	chromosome partitioning protein ParB	CP025808.1	407245	408132	+	C1J04_01885	6856	0.225872	ParB
Rhodobacterales	Sulfitobacter sp. SK025	GCA_003352105.1	AXI49584.1	hybrid sensor histidine kinase/response regulator	CP025808.1	225630	227771	+	C1J04_01050	2860591	94.2425	DivL
Rhodobacterales	Sulfitobacter sp. SK025	GCA_003352105.1	AXI49740.1	ParA family protein	CP025808.1	406429	407229	+	C1J04_01880	6040	0.198989	ParA
Rhodobacterales	Sulfitobacter sp. SK025	GCA_003352105.1	AXI49399.1	chromosomal replication initiator protein DnaA	CP025808.1	3035348	3036706	+	C1J04_00005	2634959	86.8091	DnaA
Rhodobacterales	Sulfitobacter sp. SK025	GCA_003352105.1	AXI49716.1	PAS domain-containing protein	CP025808.1	379605	381116	+	C1J04_01755	3014566	99.3153	DivL
Rhodobacterales	Sulfitobacter sp. SK025	GCA_003352105.1	AXI50219.1	GcrA cell cycle regulator	CP025808.1	939686	940285	-	C1J04_04500	539297	17.7672	GcrA
Rhodobacterales	Sulfitobacter sp. SK025	GCA_003352105.1	AXI49534.1	site-specific DNA-methyltransferase	CP025808.1	168244	169344	-	C1J04_00780	2803205	92.352	CcrM
Rhodobacterales	Sulfitobacter sp. SK025	GCA_003352105.1	AXI51135.1	DNA-binding response regulator	CP025808.1	1962463	1963182	+	C1J04_09515	1562074	51.4627	CtrA
Rhodobacterales	Tabrizicola piscis	GCA_003940805.1	AZL57881.1	response regulator	CP034328.1	617630	620185	-	EI545_02935	3900791	93.1174	DivL
Rhodobacterales	Tabrizicola piscis	GCA_003940805.1	AZL59294.1	ParA family protein	CP034328.1	2219957	2220781	+	EI545_10825	1314006	31.3672	ParA
Rhodobacterales	Tabrizicola piscis	GCA_003940805.1	AZL59427.1	diguanylate cyclase	CP034328.1	2376786	2378363	+	EI545_11580	1470835	35.1109	DivL
Rhodobacterales	Tabrizicola piscis	GCA_003940805.1	AZL57495.1	ATP-dependent Clp protease ATP-binding subunit ClpX	CP034328.1	159071	160333	-	EI545_00730	3442232	82.1709	ClpX
Rhodobacterales	Tabrizicola piscis	GCA_003940805.1	AZL60968.1	DNA-binding response regulator	CP034328.1	251079	251789	-	EI545_01155	3534240	84.3673	CtrA
Rhodobacterales	Tabrizicola piscis	GCA_003940805.1	AZL57907.1	histidine phosphotransferase	CP034328.1	654222	654818	+	EI545_03090	3937383	93.9909	ChpT
Rhodobacterales	Tabrizicola piscis	GCA_003940805.1	AZL59474.1	chromosomal replication initiator protein DnaA	CP034328.1	2429999	2431357	+	EI545_11860	1524048	36.3812	DnaA
Rhodobacterales	Tabrizicola piscis	GCA_003940805.1	AZL60083.1	GcrA cell cycle regulator	CP034328.1	3160870	3161481	-	EI545_15345	2254919	53.8281	GcrA
Rhodobacterales	Tabrizicola piscis	GCA_003940805.1	AZL57409.1	response regulator	CP034328.1	61672	63717	-	EI545_00255	3344833	79.8459	CckA
Rhodobacterales	Tabrizicola piscis	GCA_003940805.1	AZL59487.1	site-specific DNA-methyltransferase	CP034328.1	2443908	2445029	+	EI545_11935	1537957	36.7132	CcrM
Rhodobacterales	Tabrizicola piscis	GCA_003940805.1	AZL59295.1	ParB/RepB/Spo0J family partition protein	CP034328.1	2220785	2221699	+	EI545_10830	1314834	31.3869	ParB
Rhodobacterales	Thioclava nitratireducens	GCA_001940525.2	AQS46488.1	hybrid sensor histidine kinase/response regulator	CP019437.1	152443	154656	+	BMG03_00755	3687457	94.2919	DivL
Rhodobacterales	Thioclava nitratireducens	GCA_001940525.2	AQS49268.1	GcrA cell cycle regulator	CP019437.1	3507767	3508369	+	BMG03_16840	3132100	80.0909	GcrA
Rhodobacterales	Thioclava nitratireducens	GCA_001940525.2	AQS49633.1	chromosomal replication initiation protein DnaA	CP019437.1	373	1767	+	BMG03_00005	3535387	90.4034	DnaA
Rhodobacterales	Thioclava nitratireducens	GCA_001940525.2	AQS48048.1	hypothetical protein	CP019437.1	2018480	2019094	-	BMG03_09710	1642813	42.0084	ChpT
Rhodobacterales	Thioclava nitratireducens	GCA_001940525.2	AQS49830.1	hybrid sensor histidine kinase/response regulator	CP019437.1	2148648	2151026	+	BMG03_10370	1772981	45.3369	CckA
Rhodobacterales	Thioclava nitratireducens	GCA_001940525.2	AQS46631.1	modification methylase	CP019437.1	294273	295376	-	BMG03_01530	3829287	97.9187	CcrM
Rhodobacterales	Thioclava nitratireducens	GCA_001940525.2	AQS46759.1	hypothetical protein	CP019437.1	433238	434842	+	BMG03_02255	57571	1.47215	DivL
Rhodobacterales	Thioclava nitratireducens	GCA_001940525.2	AQS46710.1	chromosome partitioning protein ParB	CP019437.1	382568	383449	+	BMG03_01980	6901	0.176465	ParB
Rhodobacterales	Thioclava nitratireducens	GCA_001940525.2	AQS46709.1	chromosome partitioning protein ParA	CP019437.1	381753	382565	+	BMG03_01975	6086	0.155625	ParA
Rhodobacterales	Thioclava nitratireducens	GCA_001940525.2	AQS47679.1	ATP-dependent protease ATP-binding subunit ClpX	CP019437.1	1582821	1584086	+	BMG03_07615	1207154	30.8681	ClpX
Rhodobacterales	Thioclava nitratireducens	GCA_001940525.2	AQS48308.1	DNA-binding response regulator	CP019437.1	2352057	2352770	-	BMG03_11240	1976390	50.5383	CtrA
Rhodobacterales	Yangia sp. CCB-MM3	GCA_001687105.1	ANT61582.1	hybrid sensor histidine kinase/response regulator	CP014595.1	2862779	2865049	+	AYJ57_13725	1265496	43.6052	CckA
Rhodobacterales	Yangia sp. CCB-MM3	GCA_001687105.1	ANT60254.1	chromosome partitioning protein ParB	CP014595.1	1590457	1591362	-	AYJ57_07685	2895344	99.7648	ParB
Rhodobacterales	Yangia sp. CCB-MM3	GCA_001687105.1	ANT59899.1	modification methylase	CP014595.1	1157832	1158944	+	AYJ57_05650	2462719	84.8578	CcrM
Rhodobacterales	Yangia sp. CCB-MM3	GCA_001687105.1	ANT59241.1	DNA-binding response regulator	CP014595.1	411574	412281	-	AYJ57_02015	1716461	59.1441	CtrA
Rhodobacterales	Yangia sp. CCB-MM3	GCA_001687105.1	ANT59334.1	hypothetical protein	CP014595.1	520276	520881	+	AYJ57_02515	1825163	62.8896	ChpT
Rhodobacterales	Yangia sp. CCB-MM3	GCA_001687105.1	ANT59572.1	ATP-dependent Clp protease ATP-binding subunit ClpX	CP014595.1	788210	789475	-	AYJ57_03835	2093097	72.1218	ClpX
Rhodobacterales	Yangia sp. CCB-MM3	GCA_001687105.1	ANT60303.1	hybrid sensor histidine kinase/response regulator	CP014595.1	1658084	1660597	+	AYJ57_08005	60801	2.09502	DivL
Rhodobacterales	Yangia sp. CCB-MM3	GCA_001687105.1	ANT60255.1	chromosome partitioning protein ParA	CP014595.1	1591391	1592200	-	AYJ57_07690	2896278	99.797	ParA
Rhodobacterales	Yangia sp. CCB-MM3	GCA_001687105.1	ANT60210.1	diguanylate cyclase	CP014595.1	1534519	1536012	+	AYJ57_07435	2839406	97.8373	DivL
Rhodobacterales	Yangia sp. CCB-MM3	GCA_001687105.1	ANT60283.1	chromosomal replication initiation protein DnaA	CP014595.1	1622644	1624086	+	AYJ57_07850	25361	0.873863	DnaA
Rhodospirillales	Acetobacter ascendens	GCA_002173775.1	ARW11269.1	ATP-dependent Clp protease ATP-binding subunit ClpX	CP021524.1	2321038	2322303	+	S101447_02216	1037266	35.745	ClpX
Rhodospirillales	Acetobacter ascendens	GCA_002173775.1	ARW10375.1	putative chromosome-partitioning protein ParB	CP021524.1	1295902	1296825	+	S101447_01282	12130	0.41801	ParB
Rhodospirillales	Acetobacter ascendens	GCA_002173775.1	ARW09370.1	Site-specific DNA-methyltransferase (adenine-specific)	CP021524.1	282765	283868	-	S101447_00264	1900839	65.5045	CcrM
Rhodospirillales	Acetobacter ascendens	GCA_002173775.1	ARW10374.1	Chromosome partitioning protein ParA	CP021524.1	1295108	1295905	+	S101447_01281	11336	0.390648	ParA
Rhodospirillales	Acetobacter ascendens	GCA_002173775.1	ARW10243.1	hypothetical protein	CP021524.1	1149607	1150212	+	S101447_01145	2767681	95.3766	GcrA
Rhodospirillales	Acetobacter ascendens	GCA_002173775.1	ARW09109.1	Chromosomal replication initiator protein DnaA	CP021524.1	1	1434	+	S101447_00001	1618075	55.7602	DnaA
Rhodospirillales	Acetobacter ascendens	GCA_002173775.1	ARW10423.1	Transcriptional regulatory protein	CP021524.1	1348115	1348897	-	S101447_01333	64343	2.21731	CtrA
Rhodospirillales	Acetobacter oryzifermentans	GCA_001628715.1	ANA14805.1	chromosome partitioning protein ParA	CP011120.1	2787730	2788527	-	WG31_13150	2787730	99.58	ParA
Rhodospirillales	Acetobacter oryzifermentans	GCA_001628715.1	ANA14760.1	regulator	CP011120.1	2735060	2735845	+	WG31_12900	2735060	97.6986	CtrA
Rhodospirillales	Acetobacter oryzifermentans	GCA_001628715.1	ANA13512.1	modification methylase	CP011120.1	1094391	1095494	+	WG31_05365	1094391	39.0925	CcrM
Rhodospirillales	Acetobacter oryzifermentans	GCA_001628715.1	ANA14804.1	chromosome partitioning protein ParB	CP011120.1	2786810	2787733	-	WG31_13145	2786810	99.5471	ParB
Rhodospirillales	Acetobacter oryzifermentans	GCA_001628715.1	ANA13740.1	chromosomal replication initiation protein	CP011120.1	1376861	1378294	-	WG31_06675	1376861	49.1826	DnaA
Rhodospirillales	Acetobacter oryzifermentans	GCA_001628715.1	ANA14043.1	Clp protease	CP011120.1	1808549	1809814	-	WG31_08525	1808549	64.6028	ClpX
Rhodospirillales	Acetobacter oryzifermentans	GCA_001628715.1	ANA12707.1	GcrA cell cycle regulator	CP011120.1	135946	136551	-	WG31_00625	135946	4.8561	GcrA
Rhodospirillales	Acetobacter oryzifermentans	GCA_002220195.1	ASL40560.1	ATP-dependent Clp protease ATP-binding subunit ClpX	CP022374.1	1903471	1904736	-	CBI36_09110	1906745	60.9679	ClpX
Rhodospirillales	Acetobacter oryzifermentans	GCA_002220195.1	ASL39908.1	site-specific DNA-methyltransferase	CP022374.1	1041284	1042387	+	CBI36_05210	1044558	33.3996	CcrM
Rhodospirillales	Acetobacter oryzifermentans	GCA_002220195.1	ASL41455.1	DNA-binding response regulator	CP022374.1	3023922	3024707	+	CBI36_14420	3027196	96.7942	CtrA
Rhodospirillales	Acetobacter oryzifermentans	GCA_002220195.1	ASL41498.1	chromosome partitioning protein ParB	CP022374.1	3075665	3076588	-	CBI36_14665	3078939	98.4487	ParB
Rhodospirillales	Acetobacter oryzifermentans	GCA_002220195.1	ASL39099.1	GcrA cell cycle regulator	CP022374.1	132672	133277	-	CBI36_00625	135946	4.34686	GcrA
Rhodospirillales	Acetobacter oryzifermentans	GCA_002220195.1	ASL40147.1	chromosomal replication initiation protein DnaA	CP022374.1	1323739	1325172	-	CBI36_06535	1327013	42.4311	DnaA
Rhodospirillales	Acetobacter oryzifermentans	GCA_002220195.1	ASL41499.1	ParA family protein	CP022374.1	3076585	3077382	-	CBI36_14670	3079859	98.4781	ParA
Rhodospirillales	Acetobacter oryzoeni	GCA_004014775.2	QEE85262.1	chromosomal replication initiator protein DnaA	CP042808.1	1193675	1195108	-	EOV40_005710	1193675	43.495	DnaA
Rhodospirillales	Acetobacter oryzoeni	GCA_004014775.2	QEE86466.1	response regulator transcription factor	CP042808.1	2710455	2711237	+	EOV40_012650	2710455	98.7634	CtrA
Rhodospirillales	Acetobacter oryzoeni	GCA_004014775.2	QEE85011.1	site-specific DNA-methyltransferase	CP042808.1	911276	912379	+	EOV40_004400	911276	33.205	CcrM
Rhodospirillales	Acetobacter oryzoeni	GCA_004014775.2	QEE84367.1	GcrA cell cycle regulator	CP042808.1	176551	177156	-	EOV40_000860	176551	6.43315	GcrA
Rhodospirillales	Acetobacter oryzoeni	GCA_004014775.2	QEE85611.1	ATP-dependent Clp protease ATP-binding subunit ClpX	CP042808.1	1680496	1681761	-	EOV40_007760	1680496	61.2338	ClpX
Rhodospirillales	Acetobacter oryzoeni	GCA_004014775.2	QEE84240.1	ParA family protein	CP042808.1	30934	31731	-	EOV40_000160	30934	1.12717	ParA
Rhodospirillales	Acetobacter oryzoeni	GCA_004014775.2	QEE84239.1	ParB/RepB/Spo0J family partition protein	CP042808.1	30014	30937	-	EOV40_000155	30014	1.09365	ParB
Rhodospirillales	Acetobacter pasteurianus IFO 3283-01	GCA_000010825.1	BAI00710.1	two component response regulator CtrA	AP011121.1	2831584	2832369	+	APA01_26130	1674927	57.6072	CtrA
Rhodospirillales	Acetobacter pasteurianus IFO 3283-01	GCA_000010825.1	BAH99379.1	chromosomal replication initiator protein DnaA	AP011121.1	1291083	1292516	-	APA01_12320	134426	4.62343	DnaA
Rhodospirillales	Acetobacter pasteurianus IFO 3283-01	GCA_000010825.1	BAI00759.1	chromosome partitioning protein ParA	AP011121.1	2884055	2884852	-	APA01_26650	1727398	59.4119	ParA
Rhodospirillales	Acetobacter pasteurianus IFO 3283-01	GCA_000010825.1	BAH99118.1	DNA methyltransferase	AP011121.1	1005463	1006566	+	APA01_09690	2756301	94.7999	CcrM
Rhodospirillales	Acetobacter pasteurianus IFO 3283-01	GCA_000010825.1	BAI00758.1	chromosome partitioning protein ParB	AP011121.1	2883135	2884058	-	APA01_26640	1726478	59.3803	ParB
Rhodospirillales	Acetobacter pasteurianus IFO 3283-01	GCA_000010825.1	BAH98281.1	hypothetical protein	AP011121.1	135318	135926	-	APA01_01260	1886156	64.8722	GcrA
Rhodospirillales	Acetobacter pasteurianus IFO 3283-01	GCA_000010825.1	BAH99778.1	Clp protease ATP-binding subunit ClpX	AP011121.1	1782098	1783363	-	APA01_16480	625441	21.5113	ClpX
Rhodospirillales	Acetobacter persici	GCA_002006565.1	AQT04877.1	GcrA cell cycle regulator	CP014687.1	1780247	1780849	+	A0U91_08020	739239	22.8831	GcrA
Rhodospirillales	Acetobacter persici	GCA_002006565.1	AQT04196.1	modification methylase	CP014687.1	756890	758014	-	A0U91_03400	2946389	91.2052	CcrM
Rhodospirillales	Acetobacter persici	GCA_002006565.1	AQT04931.1	chromosome partitioning protein ParA	CP014687.1	1854751	1855542	-	A0U91_08375	813743	25.1893	ParA
Rhodospirillales	Acetobacter persici	GCA_002006565.1	AQT04930.1	chromosome partitioning protein ParB	CP014687.1	1853831	1854748	-	A0U91_08370	812823	25.1608	ParB
Rhodospirillales	Acetobacter persici	GCA_002006565.1	AQT05889.1	chromosomal replication initiation protein DnaA	CP014687.1	441338	442756	+	A0U91_01965	2630837	81.4373	DnaA
Rhodospirillales	Acetobacter persici	GCA_002006565.1	AQT05711.1	ATP-dependent Clp protease ATP-binding subunit ClpX	CP014687.1	3066161	3067429	+	A0U91_13720	2025153	62.6884	ClpX
Rhodospirillales	Acetobacter pomorum	GCA_002456135.1	ATI12297.1	chromosome partitioning protein ParB	CP023657.1	1564729	1565652	+	CPF11_07415	12088	0.424425	ParB
Rhodospirillales	Acetobacter pomorum	GCA_002456135.1	ATI12353.1	DNA-binding response regulator	CP023657.1	1628488	1629273	-	CPF11_07730	75847	2.66308	CtrA
Rhodospirillales	Acetobacter pomorum	GCA_002456135.1	ATI12174.1	GcrA cell cycle regulator	CP023657.1	1416452	1417057	+	CPF11_06705	2711900	95.2182	GcrA
Rhodospirillales	Acetobacter pomorum	GCA_002456135.1	ATI13099.1	ATP-dependent Clp protease ATP-binding subunit ClpX	CP023657.1	2558404	2559669	+	CPF11_12055	1005763	35.3136	ClpX
Rhodospirillales	Acetobacter pomorum	GCA_002456135.1	ATI11205.1	chromosomal replication initiator protein DnaA	CP023657.1	265258	266691	+	CPF11_01275	1560706	54.7984	DnaA
Rhodospirillales	Acetobacter pomorum	GCA_002456135.1	ATI11445.1	site-specific DNA-methyltransferase	CP023657.1	548053	549156	-	CPF11_02590	1843501	64.7276	CcrM
Rhodospirillales	Acetobacter pomorum	GCA_002456135.1	ATI12296.1	ParA family protein	CP023657.1	1563935	1564732	+	CPF11_07410	11294	0.396547	ParA
Rhodospirillales	Acetobacter senegalensis	GCA_001499615.1	CEF39632.1	Site-specific DNA-methyltransferase (adenine-specific)	LN606600.1	124763	125896	-	ASN_187	2418025	62.1619	CcrM
Rhodospirillales	Acetobacter senegalensis	GCA_001499615.1	CEF40986.1	chromosome partitioning protein	LN606600.1	1611009	1611800	+	ASN_1642	14390	0.369934	ParA
Rhodospirillales	Acetobacter senegalensis	GCA_001499615.1	CEF40987.1	chromosome partitioning protein%2C ParB family	LN606600.1	1611803	1612711	+	ASN_1643	15184	0.390346	ParB
Rhodospirillales	Acetobacter senegalensis	GCA_001499615.1	CEF42841.1	chromosomal replication initiator protein	LN606600.1	3680938	3682380	+	ASN_3617	2084319	53.5831	DnaA
Rhodospirillales	Acetobacter senegalensis	GCA_001499615.1	CEF41051.1	two-component system%2C cell cycle response regulator CtrA	LN606600.1	1679721	1680479	-	ASN_1709	83102	2.13636	CtrA
Rhodospirillales	Acetobacter senegalensis	GCA_001499615.1	CEF40824.1	hypothetical protein	LN606600.1	1418670	1419269	+	ASN_1467	3711932	95.4253	GcrA
Rhodospirillales	Acetobacter senegalensis	GCA_001499615.1	CEF42329.1	ATP-dependent Clp protease ATP-binding subunit ClpX	LN606600.1	3047811	3049076	+	ASN_3082	1451192	37.3068	ClpX
Rhodospirillales	Acetobacter sp. JWB	GCA_003323795.1	AXC26456.1	chromosomal replication initiator protein DnaA	CP030871.1	1331817	1333250	-	DS739_06395	1331817	47.805	DnaA
Rhodospirillales	Acetobacter sp. JWB	GCA_003323795.1	AXC27565.1	ParA family protein	CP030871.1	2750624	2751421	-	DS739_13000	2750624	98.7326	ParA
Rhodospirillales	Acetobacter sp. JWB	GCA_003323795.1	AXC26786.1	ATP-dependent Clp protease ATP-binding subunit ClpX	CP030871.1	1767307	1768572	-	DS739_08375	1767307	63.4368	ClpX
Rhodospirillales	Acetobacter sp. JWB	GCA_003323795.1	AXC26218.1	site-specific DNA-methyltransferase	CP030871.1	1049354	1050457	+	DS739_05080	1049354	37.6661	CcrM
Rhodospirillales	Acetobacter sp. JWB	GCA_003323795.1	AXC27564.1	ParB/RepB/Spo0J family partition protein	CP030871.1	2749704	2750627	-	DS739_12995	2749704	98.6995	ParB
Rhodospirillales	Acetobacter sp. JWB	GCA_003323795.1	AXC25463.1	GcrA cell cycle regulator	CP030871.1	148684	149289	-	DS739_00720	148684	5.33695	GcrA
Rhodospirillales	Acetobacter sp. JWB	GCA_003323795.1	AXC27510.1	DNA-binding response regulator	CP030871.1	2686236	2687021	+	DS739_12680	2686236	96.4214	CtrA
Rhodospirillales	Acetobacteraceae bacterium	GCA_004843165.1	QCE32547.1	site-specific DNA-methyltransferase	CP039459.1	533894	535006	-	FAI41_02560	1431857	74.4369	CcrM
Rhodospirillales	Acetobacteraceae bacterium	GCA_004843165.1	QCE32196.1	ATP-dependent Clp protease ATP-binding subunit ClpX	CP039459.1	112323	113585	-	FAI41_00535	1010286	52.521	ClpX
Rhodospirillales	Acetobacteraceae bacterium	GCA_004843165.1	QCE33788.1	ParB/RepB/Spo0J family partition protein	CP039459.1	992420	993361	+	FAI41_04995	1890383	98.2739	ParB
Rhodospirillales	Acetobacteraceae bacterium	GCA_004843165.1	QCE33005.1	ParA family protein	CP039459.1	991554	992354	+	FAI41_04990	1889517	98.2289	ParA
Rhodospirillales	Acetobacteraceae bacterium	GCA_004843165.1	QCE32100.1	chromosomal replication initiator protein DnaA	CP039459.1	64	1515	+	FAI41_00005	898027	46.685	DnaA
Rhodospirillales	Acidiphilium cryptum JF-5	GCA_000016725.1	ABQ31032.1	two component transcriptional regulator%2C winged helix family	CP000697.1	2019963	2020715	+	Acry_1830	2677195	78.9913	CtrA
Rhodospirillales	Acidiphilium cryptum JF-5	GCA_000016725.1	ABQ31597.1	chromosome segregation DNA-binding protein	CP000697.1	2648931	2649809	-	Acry_2403	3306163	97.5492	ParB
Rhodospirillales	Acidiphilium cryptum JF-5	GCA_000016725.1	ABQ29230.1	chromosomal replication initiator protein DnaA	CP000697.1	261	1709	+	Acry_0001	657493	19.3995	DnaA
Rhodospirillales	Acidiphilium cryptum JF-5	GCA_000016725.1	ABQ31598.1	chromosome segregation ATPase	CP000697.1	2649806	2650597	-	Acry_2404	3307038	97.575	ParA
Rhodospirillales	Acidiphilium cryptum JF-5	GCA_000016725.1	ABQ30658.1	DNA methylase N-4/N-6 domain protein	CP000697.1	1609664	1610746	-	Acry_1449	2266896	66.8853	CcrM
Rhodospirillales	Acidiphilium cryptum JF-5	GCA_000016725.1	ABQ30137.1	ATP-dependent Clp protease%2C ATP-binding subunit ClpX	CP000697.1	1019750	1021006	+	Acry_0918	1676982	49.4798	ClpX
Rhodospirillales	Acidiphilium multivorum AIU301	GCA_000202835.1	BAJ82078.1	chromosome partitioning protein ParB	AP012035.1	3004878	3005756	-	ACMV_27310	3683552	98.2435	ParB
Rhodospirillales	Acidiphilium multivorum AIU301	GCA_000202835.1	BAJ81418.1	cell cycle response regulator CtrA	AP012035.1	2300400	2301152	+	ACMV_20710	2979074	79.4545	CtrA
Rhodospirillales	Acidiphilium multivorum AIU301	GCA_000202835.1	BAJ80316.1	ATP-dependent Clp protease ATP-binding subunit ClpX	AP012035.1	1101929	1103185	-	ACMV_09690	1780603	47.4902	ClpX
Rhodospirillales	Acidiphilium multivorum AIU301	GCA_000202835.1	BAJ79348.1	chromosomal replication initiator protein DnaA	AP012035.1	237	1709	+	ACMV_00010	678911	18.1071	DnaA
Rhodospirillales	Acidiphilium multivorum AIU301	GCA_000202835.1	BAJ82079.1	chromosome partitioning protein ParA	AP012035.1	3005753	3006544	-	ACMV_27320	3684427	98.2668	ParA
Rhodospirillales	Acidiphilium multivorum AIU301	GCA_000202835.1	BAJ80843.1	hypothetical protein	AP012035.1	1679925	1681001	-	ACMV_14960	2358599	62.9059	CcrM
Rhodospirillales	Asaia bogorensis NBRC 16594	GCA_001547995.1	BAT20980.1	chromosome partitioning nuclease protein ParB	AP014690.1	3092151	3093032	-	Asbog_02744	3098032	96.866	ParB
Rhodospirillales	Asaia bogorensis NBRC 16594	GCA_001547995.1	BAT20199.1	two component transcriptional regulator cell cycle CtrA	AP014690.1	2145136	2145879	+	Asbog_01939	2151017	67.2557	CtrA
Rhodospirillales	Asaia bogorensis NBRC 16594	GCA_001547995.1	BAT19385.1	ATP-dependent Clp protease ATP-binding subunit ClpX	AP014690.1	1214323	1215591	+	Asbog_01104	1220204	38.1521	ClpX
Rhodospirillales	Asaia bogorensis NBRC 16594	GCA_001547995.1	BAT19062.1	DNA methyltransferase	AP014690.1	839903	840991	+	Asbog_00767	845784	26.4451	CcrM
Rhodospirillales	Asaia bogorensis NBRC 16594	GCA_001547995.1	BAT20981.1	chromosome partitioning ATPase ParA	AP014690.1	3093029	3093841	-	Asbog_02745	3098910	96.8935	ParA
Rhodospirillales	Asaia bogorensis NBRC 16594	GCA_001547995.1	BAT19486.1	chromosomal replication initiator protein DnaA	AP014690.1	1332863	1334272	+	Asbog_01212	1338744	41.8584	DnaA
Rhodospirillales	Asaia bogorensis NBRC 16594	GCA_001547995.1	BAT18499.1	GcrA cell cycle regulator domain protein	AP014690.1	201681	202430	+	Asbog_00187	207562	6.48983	GcrA
Rhodospirillales	Azospirillum brasilense	GCA_001315015.1	ALJ34088.1	chromosomal replication initiation protein	CP012914.1	187491	189035	+	AMK58_00910	1536175	51.1083	DnaA
Rhodospirillales	Azospirillum brasilense	GCA_001315015.1	ALJ33988.1	chromosome partitioning protein ParB	CP012914.1	76299	77213	-	AMK58_00350	1424983	47.4089	ParB
Rhodospirillales	Azospirillum brasilense	GCA_001315015.1	ALJ35732.1	histidine kinase	CP012914.1	2172464	2174989	-	AMK58_10030	515422	17.148	CckA
Rhodospirillales	Azospirillum brasilense	GCA_001315015.1	ALJ34218.1	histidine kinase	CP012914.1	337460	339844	-	AMK58_01615	1686144	56.0977	DivL
Rhodospirillales	Azospirillum brasilense	GCA_001315015.1	ALJ35026.1	ATP-dependent Clp protease ATP-binding subunit ClpX	CP012914.1	1332477	1333745	+	AMK58_06085	2681161	89.2018	ClpX
Rhodospirillales	Azospirillum brasilense	GCA_001315015.1	ALJ33989.1	chromosome partitioning protein ParA	CP012914.1	77210	78016	-	AMK58_00355	1425894	47.4393	ParA
Rhodospirillales	Azospirillum brasilense	GCA_001315015.1	ALJ35714.1	global cell cycle regulator GcrA-like protein	CP012914.1	2152706	2153089	-	AMK58_09935	495664	16.4907	GcrA
Rhodospirillales	Azospirillum oryzae	GCA_013347285.1	QKS50924.1	ParB/RepB/Spo0J family partition protein	CP054619.1	299659	300570	-	HUE56_10335	299659	10.6969	ParB
Rhodospirillales	Azospirillum oryzae	GCA_013347285.1	QKS50925.1	ParA family protein	CP054619.1	300567	301364	-	HUE56_10340	300567	10.7293	ParA
Rhodospirillales	Azospirillum oryzae	GCA_013347285.1	QKS50796.1	PAS-domain containing protein	CP054619.1	131942	134248	+	HUE56_09605	131942	4.7099	DivL
Rhodospirillales	Azospirillum oryzae	GCA_013347285.1	QKS51963.1	PAS domain S-box protein	CP054619.1	1498367	1500898	+	HUE56_16150	1498367	53.4869	CckA
Rhodospirillales	Azospirillum oryzae	GCA_013347285.1	QKS51740.1	ATP-dependent Clp protease ATP-binding subunit ClpX	CP054619.1	1222449	1223711	+	HUE56_14895	1222449	43.6375	ClpX
Rhodospirillales	Azospirillum oryzae	GCA_013347285.1	QKS52390.1	global cell cycle regulator GcrA-like protein	CP054619.1	2003819	2004187	-	HUE56_18560	2003819	71.5299	GcrA
Rhodospirillales	Azospirillum oryzae	GCA_013347285.1	QKS50761.1	chromosomal replication initiator protein DnaA	CP054619.1	89236	90798	-	HUE56_09410	89236	3.18544	DnaA
Rhodospirillales	Azospirillum sp. TSA2s	GCA_004923315.1	QCG98455.1	global cell cycle regulator GcrA-like protein	CP039650.1	2251674	2252042	+	E6C67_32905	1092835	38.9657	GcrA
Rhodospirillales	Azospirillum sp. TSA2s	GCA_004923315.1	QCG98886.1	PAS domain S-box protein	CP039650.1	2770137	2772683	-	E6C67_35350	1611298	57.4518	CckA
Rhodospirillales	Azospirillum sp. TSA2s	GCA_004923315.1	QCG97675.1	PAS domain-containing protein	CP039650.1	1313626	1315944	-	E6C67_28455	154787	5.51903	DivL
Rhodospirillales	Azospirillum sp. TSA2s	GCA_004923315.1	QCG97553.1	ParA family protein	CP039650.1	1171515	1172312	+	E6C67_27760	12676	0.451971	ParA
Rhodospirillales	Azospirillum sp. TSA2s	GCA_004923315.1	QCG96706.1	ATP-dependent Clp protease ATP-binding subunit ClpX	CP039650.1	217301	218563	-	E6C67_22970	1863068	66.4289	ClpX
Rhodospirillales	Azospirillum sp. TSA2s	GCA_004923315.1	QCG97709.1	chromosomal replication initiator protein DnaA	CP039650.1	1356697	1358244	+	E6C67_28650	197858	7.05475	DnaA
Rhodospirillales	Azospirillum sp. TSA2s	GCA_004923315.1	QCG97554.1	ParB/RepB/Spo0J family partition protein	CP039650.1	1172309	1173220	+	E6C67_27765	13470	0.480281	ParB
Rhodospirillales	Azospirillum sp. TSH58	GCA_003119115.1	AWJ84000.1	chromosome partitioning protein ParA	CP022364.1	1611635	1612441	-	TSH58p_11005	1611635	53.3592	ParA
Rhodospirillales	Azospirillum sp. TSH58	GCA_003119115.1	AWJ83999.1	chromosome partitioning protein ParB	CP022364.1	1610721	1611638	-	TSH58p_11000	1610721	53.3289	ParB
Rhodospirillales	Azospirillum sp. TSH58	GCA_003119115.1	AWJ84234.1	sensor histidine kinase	CP022364.1	1877509	1879971	-	TSH58p_12275	1877509	62.1619	DivL
Rhodospirillales	Azospirillum sp. TSH58	GCA_003119115.1	AWJ84098.1	chromosomal replication initiation protein DnaA	CP022364.1	1721147	1722676	+	TSH58p_11545	1721147	56.985	DnaA
Rhodospirillales	Azospirillum sp. TSH58	GCA_003119115.1	AWJ84806.1	hybrid sensor histidine kinase/response regulator	CP022364.1	2555561	2558086	+	TSH58p_15515	2555561	84.6114	CckA
Rhodospirillales	Azospirillum sp. TSH58	GCA_003119115.1	AWJ83105.1	ATP-dependent protease ATP-binding subunit ClpX	CP022364.1	523797	525065	-	TSH58p_05940	523797	17.3423	ClpX
Rhodospirillales	Azospirillum sp. TSH58	GCA_003119115.1	AWJ84825.1	global cell cycle regulator GcrA-like protein	CP022364.1	2577548	2577931	+	TSH58p_15610	2577548	85.3394	GcrA
Rhodospirillales	Azospirillum thermophilum	GCA_003130795.1	AWK84819.1	hybrid sensor histidine kinase/response regulator	CP029352.1	39979	42483	-	DEW08_00200	39979	2.95724	CckA
Rhodospirillales	Azospirillum thiophilum	GCA_001305595.1	ALG70289.1	chromosome partitioning protein ParB	CP012401.1	991390	992298	-	AL072_04480	991390	32.6392	ParB
Rhodospirillales	Azospirillum thiophilum	GCA_001305595.1	ALG70237.1	histidine kinase	CP012401.1	917541	919880	+	AL072_04130	917541	30.2079	DivL
Rhodospirillales	Azospirillum thiophilum	GCA_001305595.1	ALG72156.1	histidine kinase	CP012401.1	2244292	2246712	+	AL072_10395	2244292	73.888	CckA
Rhodospirillales	Azospirillum thiophilum	GCA_001305595.1	ALG70203.1	chromosomal replication initiation protein	CP012401.1	864326	865945	+	AL072_03920	864326	28.4559	DnaA
Rhodospirillales	Azospirillum thiophilum	GCA_001305595.1	ALG70290.1	chromosome partitioning protein ParA	CP012401.1	992295	993092	-	AL072_04485	992295	32.669	ParA
Rhodospirillales	Azospirillum thiophilum	GCA_001305595.1	ALG71406.1	global cell cycle regulator GcrA-like protein	CP012401.1	2462432	2462800	+	AL072_11340	2462432	81.0697	GcrA
Rhodospirillales	Azospirillum thiophilum	GCA_001305595.1	ALG71815.1	Clp protease	CP012401.1	2999686	3000948	-	AL072_13850	2999686	98.7576	ClpX
Rhodospirillales	Bombella sp. KACC 21507	GCA_009906835.1	QHI95250.1	response regulator	CP047652.1	497604	498332	-	GT348_02245	586095	29.77	CtrA
Rhodospirillales	Bombella sp. KACC 21507	GCA_009906835.1	QHI95112.1	GcrA cell cycle regulator	CP047652.1	289197	289877	+	GT348_01340	377688	19.1842	GcrA
Rhodospirillales	Bombella sp. KACC 21507	GCA_009906835.1	QHI95875.1	site-specific DNA-methyltransferase	CP047652.1	1362078	1363163	-	GT348_06125	1450569	73.6798	CcrM
Rhodospirillales	Bombella sp. KACC 21507	GCA_009906835.1	QHI96256.1	AAA family ATPase	CP047652.1	1893479	1894279	-	GT348_08490	13223	0.671645	ParA
Rhodospirillales	Bombella sp. KACC 21507	GCA_009906835.1	QHI96255.1	ParB/RepB/Spo0J family partition protein	CP047652.1	1892578	1893486	-	GT348_08485	12322	0.62588	ParB
Rhodospirillales	Bombella sp. KACC 21507	GCA_009906835.1	QHI95573.1	chromosomal replication initiator protein DnaA	CP047652.1	937262	938788	+	GT348_04190	1025753	52.1018	DnaA
Rhodospirillales	Candidatus Endolissoclinum faulkneri L2	GCA_000319385.1	AFX98798.1	ATP-dependent Clp protease%2C ATP-binding subunit ClpX	CP003539.1	559287	560555	-	A1OE_609	559303	37.7604	ClpX
Rhodospirillales	Defluviicoccus sp.	GCA_013414705.1	QLH39386.1	PAS domain S-box protein	CP058705.1	2342094	2344262	-	HWD60_11115	2912402	66.9141	CckA
Rhodospirillales	Defluviicoccus sp.	GCA_013414705.1	QLH40565.1	global cell cycle regulator GcrA-like protein	CP058705.1	3968152	3968514	+	HWD60_18755	186012	4.27373	GcrA
Rhodospirillales	Defluviicoccus sp.	GCA_013414705.1	QLH39205.1	response regulator transcription factor	CP058705.1	2083442	2084152	+	HWD60_09980	2653750	60.9714	CtrA
Rhodospirillales	Defluviicoccus sp.	GCA_013414705.1	QLH39207.1	hypothetical protein	CP058705.1	2085231	2086016	-	HWD60_09990	2655539	61.0125	ChpT
Rhodospirillales	Defluviicoccus sp.	GCA_013414705.1	QLH41190.1	ParA family protein	CP058705.1	3767065	3767835	-	HWD60_17845	4337373	99.6536	ParA
Rhodospirillales	Defluviicoccus sp.	GCA_013414705.1	QLH39171.1	ATP-dependent Clp protease ATP-binding subunit ClpX	CP058705.1	2035613	2036878	-	HWD60_09760	2605921	59.8725	ClpX
Rhodospirillales	Defluviicoccus sp.	GCA_013414705.1	QLH40527.1	site-specific DNA-methyltransferase	CP058705.1	3911241	3912278	+	HWD60_18515	129101	2.96617	CcrM
Rhodospirillales	Ferrovibrio terrae	GCA_007197755.1	QDO99384.1	response regulator	CP041636.1	4054907	4057225	-	FNB15_19805	2748195	64.4415	CckA
Rhodospirillales	Ferrovibrio terrae	GCA_007197755.1	QDO99661.1	ParA family protein	CP041636.1	1336660	1337460	+	FNB15_06535	29948	0.702241	ParA
Rhodospirillales	Ferrovibrio terrae	GCA_007197755.1	QDO99696.1	site-specific DNA-methyltransferase	CP041636.1	1746998	1748026	-	FNB15_08565	440286	10.3241	CcrM
Rhodospirillales	Ferrovibrio terrae	GCA_007197755.1	QDO98370.1	ATP-dependent Clp protease ATP-binding subunit ClpX	CP041636.1	2946790	2948052	+	FNB15_14295	1640078	38.4576	ClpX
Rhodospirillales	Ferrovibrio terrae	GCA_007197755.1	QDO96206.1	PAS domain-containing protein	CP041636.1	506498	508579	+	FNB15_02420	3464420	81.236	DivL
Rhodospirillales	Ferrovibrio terrae	GCA_007197755.1	QDO96546.1	response regulator transcription factor	CP041636.1	905414	906133	-	FNB15_04315	3863336	90.5901	CtrA
Rhodospirillales	Ferrovibrio terrae	GCA_007197755.1	QDO96545.1	hypothetical protein	CP041636.1	904737	905351	+	FNB15_04310	3862659	90.5742	ChpT
Rhodospirillales	Ferrovibrio terrae	GCA_007197755.1	QDO98004.1	chromosomal replication initiator protein DnaA	CP041636.1	2523477	2524955	+	FNB15_12305	1216765	28.5315	DnaA
Rhodospirillales	Ferrovibrio terrae	GCA_007197755.1	QDO96952.1	ParB/RepB/Spo0J family partition protein	CP041636.1	1337583	1338527	+	FNB15_06540	30871	0.723884	ParB
Rhodospirillales	Gluconacetobacter diazotrophicus PA1 5	GCA_000067045.1	CAP55169.1	putative chromosome partitioning protein parA	AM889285.1	1218364	1219161	-	GDI1226	1218364	30.8903	ParA
Rhodospirillales	Gluconacetobacter diazotrophicus PA1 5	GCA_000067045.1	CAP54643.1	putative GcrA cell cycle regulator	AM889285.1	711443	712141	+	GDI0700	711443	18.0379	GcrA
Rhodospirillales	Gluconacetobacter diazotrophicus PA1 5	GCA_000067045.1	CAP55714.1	putative chromosomal replication initiator protein dnaA	AM889285.1	1798138	1799601	+	GDI1771	1798138	45.5899	DnaA
Rhodospirillales	Gluconacetobacter diazotrophicus PA1 5	GCA_000067045.1	CAP55168.1	putative chromosome partitioning protein parB	AM889285.1	1217477	1218367	-	GDI1225	1217477	30.8678	ParB
Rhodospirillales	Gluconacetobacter diazotrophicus PA1 5	GCA_000067045.1	CAP57305.1	putative DNA methylase	AM889285.1	3460221	3461333	-	GDI3362	3460221	87.7302	CcrM
Rhodospirillales	Gluconacetobacter diazotrophicus PA1 5	GCA_000067045.1	CAP56986.1	ATP-dependent Clp protease ATP-binding subunit	AM889285.1	3135370	3136629	-	GDI3043	3135370	79.4939	ClpX
Rhodospirillales	Gluconobacter oxydans 621H	GCA_000011685.1	AAW59800.1	Chromosomal replication initiator protein DnaA	CP000009.1	155	1594	+	GOX0001	1562600	57.8275	DnaA
Rhodospirillales	Gluconobacter oxydans 621H	GCA_000011685.1	AAW60401.1	Hypothetical protein	CP000009.1	665408	666100	-	GOX0624	2227853	82.4467	GcrA
Rhodospirillales	Gluconobacter oxydans 621H	GCA_000011685.1	AAW61433.1	Cell cycle transcriptional regulator CtrA	CP000009.1	1851733	1852476	-	GOX1693	712005	26.3493	CtrA
Rhodospirillales	Gluconobacter oxydans 621H	GCA_000011685.1	AAW60832.1	Chromosome partitioning protein ParA	CP000009.1	1163578	1164381	-	GOX1063	23850	0.882623	ParA
Rhodospirillales	Gluconobacter oxydans 621H	GCA_000011685.1	AAW60831.1	Chromosome partitioning protein ParB	CP000009.1	1162696	1163571	-	GOX1062	22968	0.849983	ParB
Rhodospirillales	Gluconobacter oxydans 621H	GCA_000011685.1	AAW60127.1	Adenine DNA methyltransferase	CP000009.1	365814	366899	-	GOX0344	1928259	71.3596	CcrM
Rhodospirillales	Gluconobacter oxydans 621H	GCA_000011685.1	AAW59882.1	ATP-dependent Clp protease ATP-binding subunit ClpX	CP000009.1	101932	103197	-	GOX0086	1664377	61.594	ClpX
Rhodospirillales	Granulibacter bethesdensis CGDNIH1	GCA_000014285.2	ABI60906.1	Chromosome partitioning protein parB	CP000394.2	8909	9775	-	GbCGDNIH1_0008	6285	0.232053	ParB
Rhodospirillales	Granulibacter bethesdensis CGDNIH1	GCA_000014285.2	ABI63160.1	Hypothetical protein	CP000394.2	2512389	2513120	-	GbCGDNIH1_2262	2509765	92.6648	GcrA
Rhodospirillales	Granulibacter bethesdensis CGDNIH1	GCA_000014285.2	ABI60907.1	Chromosome partitioning protein parA	CP000394.2	9772	10686	-	GbCGDNIH1_0009	7148	0.263916	ParA
Rhodospirillales	Granulibacter bethesdensis CGDNIH1	GCA_000014285.2	ABI62757.1	Adenine-specific methyltransferase	CP000394.2	2095968	2097125	+	GbCGDNIH1_1859	2093344	77.2898	CcrM
Rhodospirillales	Granulibacter bethesdensis CGDNIH1	GCA_000014285.2	ABI61059.1	Chromosomal replication initiator protein DNAA	CP000394.2	182939	184516	+	GbCGDNIH1_0161	180315	6.65754	DnaA
Rhodospirillales	Granulibacter bethesdensis CGDNIH1	GCA_000014285.2	ABI62204.1	ATP-dependent endopeptidase clp ATP-binding subunit clpX	CP000394.2	1450395	1451657	-	GbCGDNIH1_1306	1447771	53.4542	ClpX
Rhodospirillales	Hypericibacter adhaerens	GCA_008728835.1	QEX23500.1	hybrid sensor histidine kinase/response regulator	CP042582.1	3858890	3861022	-	FRZ61_34380	3858890	65.7925	CckA
Rhodospirillales	Hypericibacter adhaerens	GCA_008728835.1	QEX22374.1	ATP-dependent Clp protease ATP-binding subunit ClpX	CP042582.1	2623790	2625058	-	FRZ61_23040	2623790	44.7345	ClpX
Rhodospirillales	Hypericibacter adhaerens	GCA_008728835.1	QEX25114.1	chromosome partitioning protein ParA	CP042582.1	5609927	5610757	+	FRZ61_50600	5609927	95.6469	ParA
Rhodospirillales	Hypericibacter adhaerens	GCA_008728835.1	QEX25115.1	chromosome partitioning protein ParB	CP042582.1	5610754	5611659	+	FRZ61_50610	5610754	95.661	ParB
Rhodospirillales	Hypericibacter adhaerens	GCA_008728835.1	QEX20087.1	chromosomal replication initiator protein DnaA	CP042582.1	1	1389	+	FRZ61_00010	1	1.70496e-05	DnaA
Rhodospirillales	Hypericibacter adhaerens	GCA_008728835.1	QEX23589.1	histidine phosphotransferase	CP042582.1	3948501	3949196	-	FRZ61_35270	3948501	67.3203	ChpT
Rhodospirillales	Hypericibacter adhaerens	GCA_008728835.1	QEX23582.1	DNA-binding response regulator	CP042582.1	3940448	3941173	+	FRZ61_35200	3940448	67.183	CtrA
Rhodospirillales	Hypericibacter adhaerens	GCA_008728835.1	QEX20254.1	two-component sensor histidine kinase	CP042582.1	188432	190474	+	FRZ61_01710	188432	3.21269	DivL
Rhodospirillales	Hypericibacter adhaerens	GCA_008728835.1	QEX20891.1	methyltransferase	CP042582.1	901655	902818	-	FRZ61_08110	901655	15.3728	CcrM
Rhodospirillales	Komagataeibacter nataicola	GCA_002009295.1	AQU86780.1	ATP-dependent protease ATP-binding subunit ClpX	CP019875.1	840882	842141	-	B0W47_04110	2433971	69.8375	ClpX
Rhodospirillales	Komagataeibacter nataicola	GCA_002009295.1	AQU87664.1	chromosome partitioning protein ParB	CP019875.1	1951863	1952762	+	B0W47_09465	59761	1.71471	ParB
Rhodospirillales	Komagataeibacter nataicola	GCA_002009295.1	AQU87348.1	GcrA cell cycle regulator	CP019875.1	1569095	1569709	-	B0W47_07540	3162184	90.732	GcrA
Rhodospirillales	Komagataeibacter nataicola	GCA_002009295.1	AQU87663.1	chromosome partitioning protein ParA	CP019875.1	1951039	1951866	+	B0W47_09460	58937	1.69107	ParA
Rhodospirillales	Komagataeibacter nataicola	GCA_002009295.1	AQU89138.1	chromosomal replication initiation protein DnaA	CP019875.1	3057239	3058699	+	B0W47_14655	1165137	33.4311	DnaA
Rhodospirillales	Komagataeibacter nataicola	GCA_002009295.1	AQU86915.1	modification methylase	CP019875.1	1000325	1001428	-	B0W47_04875	2593414	74.4124	CcrM
Rhodospirillales	Komagataeibacter nataicola	GCA_002009295.1	AQU87281.1	DNA-binding response regulator	CP019875.1	1476462	1477190	-	B0W47_07125	3069551	88.0741	CtrA
Rhodospirillales	Komagataeibacter saccharivorans	GCA_004348195.1	QBL94205.1	Chromosome partitioning protein ParA	CP036404.1	2130386	2131210	+	KSAC_19990	52006	1.67445	ParA
Rhodospirillales	Komagataeibacter saccharivorans	GCA_004348195.1	QBL93915.1	hypothetical protein	CP036404.1	1829518	1830159	-	KSAC_16920	2856987	91.9873	GcrA
Rhodospirillales	Komagataeibacter saccharivorans	GCA_004348195.1	QBL93477.1	hypothetical protein	CP036404.1	1335202	1336290	-	KSAC_12450	2362671	76.0717	CcrM
Rhodospirillales	Komagataeibacter saccharivorans	GCA_004348195.1	QBL92255.1	Chromosomal replication initiator protein DnaA	CP036404.1	1	1458	+	KSAC_00010	1027470	33.0818	DnaA
Rhodospirillales	Komagataeibacter saccharivorans	GCA_004348195.1	QBL93835.1	Cell cycle response regulator CtrA	CP036404.1	1740897	1741622	-	KSAC_16110	2768366	89.134	CtrA
Rhodospirillales	Komagataeibacter saccharivorans	GCA_004348195.1	QBL93331.1	ATP-dependent Clp protease ATP-binding subunit ClpX	CP036404.1	1181913	1183172	-	KSAC_10970	2209382	71.1362	ClpX
Rhodospirillales	Komagataeibacter saccharivorans	GCA_004348195.1	QBL94206.1	putative chromosome-partitioning protein ParB	CP036404.1	2131210	2132112	+	KSAC_20000	52830	1.70098	ParB
Rhodospirillales	Komagataeibacter xylinus E25	GCA_000550765.1	AHI27016.1	parB-like partition protein	CP004360.1	3330973	3331872	-	H845_3112	3392578	98.4005	ParB
Rhodospirillales	Komagataeibacter xylinus E25	GCA_000550765.1	AHI26125.1	DNA methylase N-4/N-6 domain protein	CP004360.1	2358265	2359353	-	H845_2195	2419870	70.1874	CcrM
Rhodospirillales	Komagataeibacter xylinus E25	GCA_000550765.1	AHI25982.1	ATP-dependent protease ATP-binding subunit ClpX	CP004360.1	2204852	2206111	-	H845_2050	2266457	65.7378	ClpX
Rhodospirillales	Komagataeibacter xylinus E25	GCA_000550765.1	AHI26595.1	c(\Note=[K] Transcription~[C] Energy production and conversion~[R] general function prediction only~[M] Cell wall/membrane/envelope biogenesis~[L] Replication%2C recombination and repair~[S] Function unknown\", \"GcrA cell cycle regulator\")"	CP004360.1	2883003	2883617	-	H845_2674	2944608	85.4073	GcrA
Rhodospirillales	Komagataeibacter xylinus E25	GCA_000550765.1	AHI26518.1	two component transcriptional regulator%2C winged helix family protein	CP004360.1	2792853	2793578	-	H845_2596	2854458	82.7925	CtrA
Rhodospirillales	Komagataeibacter xylinus E25	GCA_000550765.1	AHI27017.1	Cobyrinic acid ac-diamide synthase	CP004360.1	3331869	3332696	-	H845_3113	3393474	98.4265	ParA
Rhodospirillales	Komagataeibacter xylinus E25	GCA_000550765.1	AHI24817.1	chromosomal replication initiator protein DnaA	CP004360.1	935381	936844	+	H845_866	996986	28.9172	DnaA
Rhodospirillales	Kozakia baliensis	GCA_001787335.1	AOX17355.1	modification methylase	CP014674.1	2080808	2081893	-	A0U89_09660	2189594	75.8162	CcrM
Rhodospirillales	Kozakia baliensis	GCA_001787335.1	AOX17993.1	chromosome partitioning protein ParA	CP014674.1	2882275	2883069	+	A0U89_13620	103032	3.56755	ParA
Rhodospirillales	Kozakia baliensis	GCA_001787335.1	AOX16271.1	DNA-binding response regulator	CP014674.1	684007	684735	-	A0U89_03075	792793	27.451	CtrA
Rhodospirillales	Kozakia baliensis	GCA_001787335.1	AOX17628.1	hypothetical protein	CP014674.1	2402303	2403004	-	A0U89_11245	2511089	86.9482	GcrA
Rhodospirillales	Kozakia baliensis	GCA_001787335.1	AOX17994.1	chromosome partitioning protein ParB	CP014674.1	2883069	2883944	+	A0U89_13625	103826	3.59505	ParB
Rhodospirillales	Kozakia baliensis	GCA_001787335.1	AOX18185.1	chromosomal replication initiation protein DnaA	CP014674.1	1593386	1594795	+	A0U89_07420	1702172	58.9389	DnaA
Rhodospirillales	Kozakia baliensis	GCA_001787335.1	AOX17082.1	ATP-dependent Clp protease ATP-binding subunit ClpX	CP014674.1	1699183	1700448	-	A0U89_07905	1807969	62.6022	ClpX
Rhodospirillales	Magnetospira sp. QH-2 (marine magnetic spirillum QH-2)	GCA_000968135.1	CCQ73883.1	ATP-dependent Clp protease ATP-binding subunit clpX	FO538765.1	2015121	2016389	-	MGMAQ_1988	2132223	53.0231	ClpX
Rhodospirillales	Magnetospira sp. QH-2 (marine magnetic spirillum QH-2)	GCA_000968135.1	CCQ75607.1	chromosome partitioning protein	FO538765.1	3889872	3890795	-	MGMAQ_3801	4006974	99.6436	ParB
Rhodospirillales	Magnetospira sp. QH-2 (marine magnetic spirillum QH-2)	GCA_000968135.1	CCQ74082.1	Conserved protein of unknown function	FO538765.1	2229898	2230536	-	MGMAQ_2193	2347000	58.3641	ChpT
Rhodospirillales	Magnetospira sp. QH-2 (marine magnetic spirillum QH-2)	GCA_000968135.1	CCQ75336.1	Modification methylase BabI	FO538765.1	3598186	3599277	+	MGMAQ_3513	3715288	92.3901	CcrM
Rhodospirillales	Magnetospira sp. QH-2 (marine magnetic spirillum QH-2)	GCA_000968135.1	CCQ71995.1	Chromosomal replication initiator protein dnaA	FO538765.1	149	1540	+	MGMAQ_0001	117251	2.91574	DnaA
Rhodospirillales	Magnetospira sp. QH-2 (marine magnetic spirillum QH-2)	GCA_000968135.1	CCQ74055.1	Two-component cell cycle transcriptional regulator ctrA	FO538765.1	2202383	2203120	+	MGMAQ_2165	2319485	57.6799	CtrA
Rhodospirillales	Magnetospira sp. QH-2 (marine magnetic spirillum QH-2)	GCA_000968135.1	CCQ75608.1	chromosome partitioning protein	FO538765.1	3890792	3891586	-	MGMAQ_3802	4007894	99.6665	ParA
Rhodospirillales	Magnetospira sp. QH-2 (marine magnetic spirillum QH-2)	GCA_000968135.1	CCQ74103.1	Putative histidine kinase with PAS 4 domain and response regulator receiver domain	FO538765.1	2256195	2258927	-	MGMAQ_2217	2373297	59.0181	CckA
Rhodospirillales	Magnetospirillum magneticum AMB-1	GCA_000009985.1	BAE51595.1	ATP-dependent protease Clp	AP007255.1	2979762	2981027	-	amb2791	2988777	60.1709	ClpX
Rhodospirillales	Magnetospirillum magneticum AMB-1	GCA_000009985.1	BAE52792.1	Modification methylase CcrmI	AP007255.1	4398261	4399337	-	amb3988	4407276	88.7285	CcrM
Rhodospirillales	Magnetospirillum magneticum AMB-1	GCA_000009985.1	BAE49440.1	ATPase	AP007255.1	683815	685248	+	amb0636	692830	13.9482	DnaA
Rhodospirillales	Magnetospirillum magneticum AMB-1	GCA_000009985.1	BAE49429.1	PAS/PAC domain	AP007255.1	672161	674695	-	amb0625	681176	13.7136	DivL
Rhodospirillales	Magnetospirillum magneticum AMB-1	GCA_000009985.1	BAE48808.1	ATPase involved in chromosome partitioning	AP007255.1	3918	4715	+	amb0004	12933	0.260371	ParA
Rhodospirillales	Magnetospirillum magneticum AMB-1	GCA_000009985.1	BAE49424.1	Signal transduction histidine kinase	AP007255.1	662854	665244	+	amb0620	671869	13.5263	CckA
Rhodospirillales	Magnetospirillum magneticum AMB-1	GCA_000009985.1	BAE49131.1	Uncharacterized protein	AP007255.1	366727	367344	-	amb0327	375742	7.56454	ChpT
Rhodospirillales	Magnetospirillum magneticum AMB-1	GCA_000009985.1	BAE49433.1	Response regulator	AP007255.1	677510	678226	+	amb0629	686525	13.8213	CtrA
Rhodospirillales	Neoasaia chiangmaiensis	GCA_002005465.1	AQS87990.1	chromosome partitioning protein ParB	CP014691.1	1837164	1838048	-	A0U93_08585	3370731	98.9105	ParB
Rhodospirillales	Neoasaia chiangmaiensis	GCA_002005465.1	AQS88428.1	hypothetical protein	CP014691.1	2361876	2362589	+	A0U93_11300	487583	14.3076	GcrA
Rhodospirillales	Neoasaia chiangmaiensis	GCA_002005465.1	AQS89334.1	modification methylase	CP014691.1	1299334	1300407	-	A0U93_06120	2832901	83.1284	CcrM
Rhodospirillales	Neoasaia chiangmaiensis	GCA_002005465.1	AQS89232.1	ATP-dependent Clp protease ATP-binding subunit ClpX	CP014691.1	620848	622113	-	A0U93_02975	2154415	63.219	ClpX
Rhodospirillales	Neoasaia chiangmaiensis	GCA_002005465.1	AQS87385.1	DNA-binding response regulator	CP014691.1	1039069	1039797	+	A0U93_04910	2572636	75.4912	CtrA
Rhodospirillales	Neoasaia chiangmaiensis	GCA_002005465.1	AQS87991.1	chromosome partitioning protein ParA	CP014691.1	1838052	1838846	-	A0U93_08590	3371619	98.9365	ParA
Rhodospirillales	Neoasaia chiangmaiensis	GCA_002005465.1	AQS89231.1	chromosomal replication initiation protein DnaA	CP014691.1	601702	603126	-	A0U93_02885	2135269	62.6572	DnaA
Rhodospirillales	Niveispirillum cyanobacteriorum	GCA_002868735.1	AUN29518.1	global cell cycle regulator GcrA-like protein	CP025611.1	948377	948751	-	C0V82_04190	1753882	51.6172	GcrA
Rhodospirillales	Niveispirillum cyanobacteriorum	GCA_002868735.1	AUN29217.1	modification methylase	CP025611.1	543728	544819	-	C0V82_02350	1349233	39.7082	CcrM
Rhodospirillales	Niveispirillum cyanobacteriorum	GCA_002868735.1	AUN31806.1	chromosomal replication initiator protein DnaA	CP025611.1	2354035	2355450	+	C0V82_10900	3159540	92.986	DnaA
Rhodospirillales	Niveispirillum cyanobacteriorum	GCA_002868735.1	AUN30175.1	DNA-binding response regulator	CP025611.1	1753459	1754169	+	C0V82_07955	2558964	75.3109	CtrA
Rhodospirillales	Niveispirillum cyanobacteriorum	GCA_002868735.1	AUN31768.1	sensor histidine kinase	CP025611.1	1908337	1910700	+	C0V82_08740	2713842	79.869	DivL
Rhodospirillales	Niveispirillum cyanobacteriorum	GCA_002868735.1	AUN28897.1	hypothetical protein	CP025611.1	111886	112557	+	C0V82_00475	917391	26.999	ChpT
Rhodospirillales	Niveispirillum cyanobacteriorum	GCA_002868735.1	AUN30868.1	chromosome partitioning protein ParB	CP025611.1	2571499	2572395	-	C0V82_11925	3377004	99.386	ParB
Rhodospirillales	Niveispirillum cyanobacteriorum	GCA_002868735.1	AUN30869.1	ParA family protein	CP025611.1	2572388	2573209	-	C0V82_11930	3377893	99.4122	ParA
Rhodospirillales	Rhodospirillum centenum SW	GCA_000016185.1	ACJ00184.1	ATPase involved in chromosome partitioning%2C putative	CP000613.2	2894657	2895481	+	RC1_2812	13027	0.29909	ParA
Rhodospirillales	Rhodospirillum centenum SW	GCA_000016185.1	ACI99149.1	cell cycle transcriptional regulator CtrA	CP000613.2	1804347	1805051	+	RC1_1752	3278260	75.2664	CtrA
Rhodospirillales	Rhodospirillum centenum SW	GCA_000016185.1	ACJ00090.1	sensor protein divL	CP000613.2	2795247	2797712	+	RC1_2715	4269160	98.0167	DivL
Rhodospirillales	Rhodospirillum centenum SW	GCA_000016185.1	ACJ00423.1	chromosomal replication initiator protein DnaA	CP000613.2	3127693	3129216	+	RC1_3057	246063	5.64942	DnaA
Rhodospirillales	Rhodospirillum centenum SW	GCA_000016185.1	ACI98337.1	GcrA cell cycle regulator%2C putative	CP000613.2	956520	956879	+	RC1_0907	2430433	55.8009	GcrA
Rhodospirillales	Rhodospirillum centenum SW	GCA_000016185.1	ACJ00185.1	chromosome partitioning protein ParB	CP000613.2	2895474	2896373	+	RC1_2813	13844	0.317848	ParB
Rhodospirillales	Rhodospirillum centenum SW	GCA_000016185.1	ACI98657.1	ATP-dependent Clp protease%2C ATP-binding subunit ClpX	CP000613.2	1299714	1300979	-	RC1_1247	2773627	63.6804	ClpX
Rhodospirillales	Rhodospirillum centenum SW	GCA_000016185.1	ACI98326.1	cell cycle histidine kinase CckA	CP000613.2	937378	939873	+	RC1_0896	2411291	55.3614	CckA
Rhodospirillales	Rhodospirillum centenum SW	GCA_000016185.1	ACI99156.1	conserved hypothetical protein	CP000613.2	1812105	1812743	-	RC1_1759	3286018	75.4445	ChpT
Rhodospirillales	Rhodospirillum centenum SW	GCA_000016185.1	ACJ00537.1	modification methylase%2C putative	CP000613.2	3262619	3263719	-	RC1_3173	380989	8.74722	CcrM
Rhodospirillales	Rhodospirillum rubrum ATCC 11170	GCA_000013085.1	ABC24422.1	chromosome segregation DNA-binding protein	CP000230.1	4168150	4169130	+	Rru_A3628	13960	0.320711	ParB
Rhodospirillales	Rhodospirillum rubrum ATCC 11170	GCA_000013085.1	ABC23617.1	multi-sensor hybrid histidine kinase / cell cycle control histidine kinase CckA	CP000230.1	3253365	3255854	-	Rru_A2820	3452000	79.3048	CckA
Rhodospirillales	Rhodospirillum rubrum ATCC 11170	GCA_000013085.1	ABC21324.1	conserved hypothetical protein	CP000230.1	613309	613983	+	Rru_A0520	811944	18.6533	ChpT
Rhodospirillales	Rhodospirillum rubrum ATCC 11170	GCA_000013085.1	ABC24237.1	PAS/PAC sensor signal transduction histidine kinase	CP000230.1	3964898	3967303	-	Rru_A3443	4163533	95.6513	DivL
Rhodospirillales	Rhodospirillum rubrum ATCC 11170	GCA_000013085.1	ABC24005.1	DNA methylase N-4/N-6	CP000230.1	3700630	3701733	+	Rru_A3210	3899265	89.5801	CcrM
Rhodospirillales	Rhodospirillum rubrum ATCC 11170	GCA_000013085.1	ABC21329.1	two component transcriptional regulator%2C winged helix family / cell cycle transcriptional regulator CtrA	CP000230.1	619719	620438	-	Rru_A0525	818354	18.8005	CtrA
Rhodospirillales	Rhodospirillum rubrum ATCC 11170	GCA_000013085.1	ABC20806.1	chromosomal replication initiator protein%2C DnaA	CP000230.1	228	1757	+	Rru_A0001	198863	4.5686	DnaA
Rhodospirillales	Rhodospirillum rubrum ATCC 11170	GCA_000013085.1	ABC24421.1	chromosome segregation ATPase	CP000230.1	4167323	4168153	+	Rru_A3627	13133	0.301712	ParA
Rhodospirillales	Rhodospirillum rubrum ATCC 11170	GCA_000013085.1	ABC22351.1	ClpX%2C ATPase regulatory subunit	CP000230.1	1828668	1829936	+	Rru_A1551	2027303	46.5744	ClpX
Rhodospirillales	Stella humosa	GCA_006738645.1	BBK29367.1	chromosomal replication initiator protein DnaA	AP019700.1	101	1489	+	STHU_00010	249004	4.26914	DnaA
Rhodospirillales	Stella humosa	GCA_006738645.1	BBK34841.1	methyltransferase	AP019700.1	5752341	5753441	+	STHU_54750	168594	2.89052	CcrM
Rhodospirillales	Stella humosa	GCA_006738645.1	BBK32075.1	ATP-dependent Clp protease ATP-binding subunit ClpX	AP019700.1	2858902	2860179	-	STHU_27090	3107805	53.2829	ClpX
Rhodospirillales	Stella humosa	GCA_006738645.1	BBK34705.1	chromosome partitioning protein ParA	AP019700.1	5598281	5599081	+	STHU_53390	14534	0.249183	ParA
Rhodospirillales	Stella humosa	GCA_006738645.1	BBK34706.1	chromosome partitioning protein ParB	AP019700.1	5599078	5599941	+	STHU_53400	15331	0.262848	ParB
Rhodospirillales	Swingsia samuiensis	GCA_006542355.1	QDH16903.1	ParB/RepB/Spo0J family partition protein	CP038141.1	978782	979663	-	E3D00_04490	10207	0.471844	ParB
Rhodospirillales	Swingsia samuiensis	GCA_006542355.1	QDH16904.1	ParA family protein	CP038141.1	979669	980472	-	E3D00_04495	11094	0.512848	ParA
Rhodospirillales	Swingsia samuiensis	GCA_006542355.1	QDH16659.1	GcrA cell cycle regulator	CP038141.1	649349	650026	-	E3D00_03020	1843988	85.243	GcrA
Rhodospirillales	Swingsia samuiensis	GCA_006542355.1	QDH16207.1	ATP-dependent Clp protease ATP-binding subunit ClpX	CP038141.1	97433	98698	-	E3D00_00440	1292072	59.7293	ClpX
Rhodospirillales	Swingsia samuiensis	GCA_006542355.1	QDH16131.1	chromosomal replication initiator protein DnaA	CP038141.1	1	1425	+	E3D00_00005	1194640	55.2252	DnaA
Rhodospirillales	Swingsia samuiensis	GCA_006542355.1	QDH16447.1	site-specific DNA-methyltransferase	CP038141.1	388125	389210	-	E3D00_01830	1582764	73.1672	CcrM
Rhodospirillales	Swingsia samuiensis	GCA_006542355.1	QDH17297.1	response regulator transcription factor	CP038141.1	1460173	1460934	-	E3D00_06780	491598	22.7254	CtrA
Rhodospirillales	Swingsia sp. F3b2	GCA_006542395.2	QDH13783.1	response regulator transcription factor	CP038231.1	1327294	1328016	-	E3E12_05830	378944	19.4749	CtrA
Rhodospirillales	Swingsia sp. F3b2	GCA_006542395.2	QDH14291.1	site-specific DNA-methyltransferase	CP038231.1	402185	403234	-	E3E12_01740	1399641	71.9312	CcrM
Rhodospirillales	Swingsia sp. F3b2	GCA_006542395.2	QDH12966.1	ATP-dependent Clp protease ATP-binding subunit ClpX	CP038231.1	165142	166509	-	E3E12_00715	1162598	59.7489	ClpX
Rhodospirillales	Swingsia sp. F3b2	GCA_006542395.2	QDH13695.1	GcrA cell cycle regulator	CP038231.1	1197741	1198406	+	E3E12_05270	249391	12.8168	GcrA
Rhodospirillales	Swingsia sp. F3b2	GCA_006542395.2	QDH14233.1	chromosomal replication initiator protein DnaA	CP038231.1	313	1935	+	E3E12_00005	997769	51.2779	DnaA
Rhodospirillales	Swingsia sp. F3b2	GCA_006542395.2	QDH14364.1	ParB/RepB/Spo0J family partition protein	CP038231.1	923979	924851	+	E3E12_04050	1921435	98.7475	ParB
Rhodospirillales	Swingsia sp. F3b2	GCA_006542395.2	QDH13505.1	ParA family protein	CP038231.1	922990	923877	+	E3E12_04045	1920446	98.6967	ParA
Rhodospirillales	Thalassospira indica	GCA_003403095.1	AXO15869.1	hypothetical protein	CP031555.1	3752077	3752682	-	DY252_17790	3441888	73.2048	ChpT
Rhodospirillales	Thalassospira indica	GCA_003403095.1	AXO12915.1	chromosomal replication initiator protein DnaA	CP031555.1	129152	130717	-	DY252_00595	4520688	96.1496	DnaA
Rhodospirillales	Thalassospira indica	GCA_003403095.1	AXO16201.1	site-specific DNA-methyltransferase	CP031555.1	4171190	4172290	-	DY252_19670	3861001	82.1188	CcrM
Rhodospirillales	Thalassospira indica	GCA_003403095.1	AXO16667.1	ParA family protein	CP031555.1	331000	331824	+	DY252_01630	20811	0.442625	ParA
Rhodospirillales	Thalassospira indica	GCA_003403095.1	AXO15862.1	DNA-binding response regulator	CP031555.1	3743653	3744348	+	DY252_17755	3433464	73.0256	CtrA
Rhodospirillales	Thalassospira indica	GCA_003403095.1	AXO15134.1	ATP-dependent Clp protease ATP-binding subunit ClpX	CP031555.1	2826884	2828149	-	DY252_13535	2516695	53.5271	ClpX
Rhodospirillales	Thalassospira indica	GCA_003403095.1	AXO13096.1	ParB/RepB/Spo0J family partition protein	CP031555.1	331821	333044	+	DY252_01635	21632	0.460086	ParB
Rhodospirillales	Thalassospira indica	GCA_003403095.1	AXO15802.1	PAS domain-containing sensor histidine kinase	CP031555.1	3670150	3672756	-	DY252_17425	3359961	71.4623	CckA
Rhodospirillales	Thalassospira indica	GCA_003403095.1	AXO16568.1	sensor histidine kinase	CP031555.1	4624644	4627193	-	DY252_21825	4314455	91.7632	DivL
Rhodospirillales	Thalassospira indica	GCA_003403095.1	AXO13608.1	global cell cycle regulator GcrA-like protein	CP031555.1	991376	991816	-	DY252_04775	681187	14.488	GcrA
Rhodospirillales	Thalassospira marina	GCA_002844375.1	AUG54060.1	global cell cycle regulator GcrA-like protein	CP024199.1	3506772	3507194	+	CSC3H3_16005	3715541	82.0163	GcrA
Rhodospirillales	Thalassospira marina	GCA_002844375.1	AUG51278.1	chromosomal replication initiator protein DnaA	CP024199.1	62	1648	+	CSC3H3_00005	208831	4.60971	DnaA
Rhodospirillales	Thalassospira marina	GCA_002844375.1	AUG54653.1	chromosome partitioning protein ParB	CP024199.1	4298944	4300179	-	CSC3H3_19470	4507713	99.5026	ParB
Rhodospirillales	Thalassospira marina	GCA_002844375.1	AUG51678.1	modification methylase	CP024199.1	529017	530117	+	CSC3H3_02340	737786	16.2858	CcrM
Rhodospirillales	Thalassospira marina	GCA_002844375.1	AUG54654.1	chromosome partitioning protein ParA	CP024199.1	4300176	4300991	-	CSC3H3_19475	4508945	99.5298	ParA
Rhodospirillales	Thalassospira marina	GCA_002844375.1	AUG51969.1	DNA-binding response regulator	CP024199.1	897762	898463	-	CSC3H3_03980	1106531	24.4254	CtrA
Rhodospirillales	Thalassospira marina	GCA_002844375.1	AUG51353.1	two-component sensor histidine kinase	CP024199.1	97308	99818	+	CSC3H3_00440	306077	6.7563	DivL
Rhodospirillales	Thalassospira marina	GCA_002844375.1	AUG51963.1	hypothetical protein	CP024199.1	888157	888768	+	CSC3H3_03945	1096926	24.2134	ChpT
Rhodospirillales	Thalassospira marina	GCA_002844375.1	AUG52032.1	hybrid sensor histidine kinase/response regulator	CP024199.1	964065	966785	+	CSC3H3_04310	1172834	25.889	CckA
Rhodospirillales	Thalassospira marina	GCA_002844375.1	AUG53074.1	ATP-dependent Clp protease ATP-binding subunit ClpX	CP024199.1	2265255	2266520	-	CSC3H3_10370	2474024	54.6113	ClpX
Rhodospirillales	Thalassospira xiamenensis M-5 = DSM 17429	GCA_000300235.2	AJD50847.1	hypothetical protein	CP004388.1	802399	803211	+	TH3_03615	971646	21.2309	ChpT
Rhodospirillales	Thalassospira xiamenensis M-5 = DSM 17429	GCA_000300235.2	AJD50517.1	DNA methylase N-4/N-6 domain-containing protein	CP004388.1	431169	432269	+	TH3_01955	600416	13.1193	CcrM
Rhodospirillales	Thalassospira xiamenensis M-5 = DSM 17429	GCA_000300235.2	AJD50853.1	two-component cell cycle transcriptional regulator ctrA	CP004388.1	810261	810959	-	TH3_03645	979508	21.4027	CtrA
Rhodospirillales	Thalassospira xiamenensis M-5 = DSM 17429	GCA_000300235.2	AJD54092.1	chromosome partitioning ATPase	CP004388.1	4385831	4386655	-	TH3_19950	4555078	99.5304	ParA
Rhodospirillales	Thalassospira xiamenensis M-5 = DSM 17429	GCA_000300235.2	AJD50206.1	PAS/PAC domain-containing protein	CP004388.1	86553	89063	+	TH3_00400	255800	5.58934	DivL
Rhodospirillales	Thalassospira xiamenensis M-5 = DSM 17429	GCA_000300235.2	AJD54091.1	Chromosome segregation DNA-binding protein	CP004388.1	4384626	4385834	-	TH3_19945	4553873	99.5041	ParB
Rhodospirillales	Thalassospira xiamenensis M-5 = DSM 17429	GCA_000300235.2	AJD50127.1	chromosomal replication initiation protein	CP004388.1	63	1643	+	TH3_00005	169310	3.6995	DnaA
Rhodospirillales	Thalassospira xiamenensis M-5 = DSM 17429	GCA_000300235.2	AJD50919.1	Signal transduction histidine kinase	CP004388.1	878928	881561	+	TH3_03985	1048175	22.9031	CckA
Rhodospirillales	Thalassospira xiamenensis M-5 = DSM 17429	GCA_000300235.2	AJD53494.1	hypothetical protein	CP004388.1	3698478	3698918	+	TH3_16960	3867725	84.5114	GcrA
Rhodospirillales	Thalassospira xiamenensis M-5 = DSM 17429	GCA_000300235.2	AJD52248.1	ATP-dependent protease ATP-binding subunit ClpX	CP004388.1	2280756	2282021	-	TH3_10660	2450003	53.5336	ClpX
Rhodospirillales	Tistrella mobilis KA081020-065	GCA_000264455.2	AFK52008.1	sensor protein divL	CP003236.1	172282	174357	-	TMO_0169	352829	9.00191	DivL
Rhodospirillales	Tistrella mobilis KA081020-065	GCA_000264455.2	AFK53067.1	two-component response regulator	CP003236.1	1347942	1348673	-	TMO_1228	1528489	38.9971	CtrA
Rhodospirillales	Tistrella mobilis KA081020-065	GCA_000264455.2	AFK53061.1	hypothetical protein	CP003236.1	1341287	1341955	+	TMO_1222	1521834	38.8273	ChpT
Rhodospirillales	Tistrella mobilis KA081020-065	GCA_000264455.2	AFK55256.1	chromosome segregation ATPase	CP003236.1	3754208	3755032	+	TMO_3418	15263	0.389413	ParA
Rhodospirillales	Tistrella mobilis KA081020-065	GCA_000264455.2	AFK51840.1	chromosomal replication initiation protein	CP003236.1	1	1578	+	TMO_0001	180548	4.60641	DnaA
Rhodospirillales	Tistrella mobilis KA081020-065	GCA_000264455.2	AFK55257.1	chromosome partitioning protein parB	CP003236.1	3755029	3755961	+	TMO_3419	16084	0.410359	ParB
Rhodospirillales	Tistrella mobilis KA081020-065	GCA_000264455.2	AFK54585.1	modification methylase	CP003236.1	3041462	3042709	+	TMO_2747	3222009	82.2048	CcrM
Rhodospirillales	Tistrella mobilis KA081020-065	GCA_000264455.2	AFK53820.1	ATP-dependent protease ATP-binding subunit	CP003236.1	2196754	2198022	-	TMO_1982	2377301	60.6533	ClpX
Sphingomonadales	Novosphingobium pentaromativorans US6-1	GCA_000767465.1	AIT81283.1	Clp protease ATP-binding protein	CP009291.1	3412820	3414082	+	JI59_16610	996894	25.0507	ClpX
Sphingomonadales	Novosphingobium pentaromativorans US6-1	GCA_000767465.1	AIT81290.1	histidine phosphotransferase	CP009291.1	3421516	3422157	+	JI59_16645	1005590	25.2692	ChpT
Sphingomonadales	Novosphingobium pentaromativorans US6-1	GCA_000767465.1	AIT78517.1	histidine kinase	CP009291.1	261121	263553	+	JI59_01170	1824701	45.8525	CckA
Sphingomonadales	Novosphingobium pentaromativorans US6-1	GCA_000767465.1	AIT81045.1	GcrA cell cycle regulator	CP009291.1	3182737	3183426	+	JI59_15290	766811	19.269	GcrA
Sphingomonadales	Novosphingobium pentaromativorans US6-1	GCA_000767465.1	AIT80371.1	chromosome partitioning protein ParA	CP009291.1	2403834	2404610	-	JI59_11560	3967414	99.6961	ParA
Sphingomonadales	Novosphingobium pentaromativorans US6-1	GCA_000767465.1	AIT78645.1	histidine kinase	CP009291.1	410287	412641	+	JI59_01860	1973867	49.6008	DivL
Sphingomonadales	Novosphingobium pentaromativorans US6-1	GCA_000767465.1	AIT80709.1	chromosomal replication initiator protein DnaA	CP009291.1	2772853	2774286	-	JI59_13455	356927	8.96913	DnaA
Sphingomonadales	Novosphingobium pentaromativorans US6-1	GCA_000767465.1	AIT80278.1	chemotaxis protein CheY	CP009291.1	2306899	2307594	-	JI59_11090	3870479	97.2603	CtrA
Sphingomonadales	Novosphingobium pentaromativorans US6-1	GCA_000767465.1	AIT78768.1	modification methylase	CP009291.1	548358	549491	+	JI59_02550	2111938	53.0704	CcrM
Sphingomonadales	Novosphingobium pentaromativorans US6-1	GCA_000767465.1	AIT80370.1	chromosome partitioning protein ParB	CP009291.1	2402851	2403771	-	JI59_11555	3966431	99.6714	ParB
Sphingomonadales	Sphingobium indicum B90A	GCA_000264945.2	APL93950.1	ATP-dependent Clp protease ATP-binding subunit ClpX	CP013070.1	1096880	1098148	+	SIDU_05200	1442104	39.463	ClpX
Sphingomonadales	Sphingobium indicum B90A	GCA_000264945.2	APL93956.1	histidine phosphotransferase	CP013070.1	1104443	1105096	+	SIDU_05230	1449667	39.6699	ChpT
Sphingomonadales	Sphingobium indicum B90A	GCA_000264945.2	APL96374.1	histidine kinase	CP013070.1	2791653	2794079	-	SIDU_13310	3136877	85.8402	CckA
Sphingomonadales	Sphingobium indicum B90A	GCA_000264945.2	APL94238.1	two-component system response regulator	CP013070.1	1437209	1437916	-	SIDU_06795	1782433	48.776	CtrA
Sphingomonadales	Sphingobium indicum B90A	GCA_000264945.2	APL93251.1	modification methylase	CP013070.1	236019	237143	+	SIDU_01190	581243	15.9056	CcrM
Sphingomonadales	Sphingobium indicum B90A	GCA_000264945.2	APL94168.1	histidine kinase	CP013070.1	1353954	1356299	-	SIDU_06405	1699178	46.4978	DivL
Sphingomonadales	Sphingobium indicum B90A	GCA_000264945.2	APL94762.1	chromosomal replication initiator DnaA	CP013070.1	2022242	2023651	-	SIDU_09710	2367466	64.7854	DnaA
Sphingomonadales	Sphingobium indicum B90A	GCA_000264945.2	APL93790.1	GcrA cell cycle regulator	CP013070.1	888591	889256	-	SIDU_04265	1233815	33.7632	GcrA
Sphingomonadales	Sphingobium indicum B90A	GCA_000264945.2	APL95822.1	chromosome partitioning protein ParA	CP013070.1	3281779	3282561	+	SIDU_15625	3627003	99.2524	ParA
Sphingomonadales	Sphingobium indicum B90A	GCA_000264945.2	APL95823.1	chromosome partitioning protein ParB	CP013070.1	3282558	3283478	+	SIDU_15630	3627782	99.2737	ParB
Sphingomonadales	Sphingomonas sanxanigenens DSM 19645 = NX02	GCA_000512205.2	AHE52742.1	hypothetical protein	CP006644.1	986627	987274	+	NX02_05005	1849903	29.8088	ChpT
Sphingomonadales	Sphingomonas sanxanigenens DSM 19645 = NX02	GCA_000512205.2	AHE53422.1	hypothetical protein	CP006644.1	1755360	1757699	+	NX02_08495	2618636	42.1959	DivL
Sphingomonadales	Sphingomonas sanxanigenens DSM 19645 = NX02	GCA_000512205.2	AHE52760.1	ATP-dependent protease	CP006644.1	1001741	1003012	+	NX02_05100	1865017	30.0523	ClpX
Sphingomonadales	Sphingomonas sanxanigenens DSM 19645 = NX02	GCA_000512205.2	AHE51750.1	chromosome partitioning protein ParA	CP006644.1	5333532	5334314	-	NX02_25375	6196808	99.8535	ParA
Sphingomonadales	Sphingomonas sanxanigenens DSM 19645 = NX02	GCA_000512205.2	AHE54934.1	modification methylase	CP006644.1	3392021	3393139	+	NX02_16275	4255297	68.5686	CcrM
Sphingomonadales	Sphingomonas sanxanigenens DSM 19645 = NX02	GCA_000512205.2	AHE56681.1	hypothetical protein	CP006644.1	5332612	5333469	-	NX02_25370	6195888	99.8387	ParB
Sphingomonadales	Sphingomonas sanxanigenens DSM 19645 = NX02	GCA_000512205.2	AHE53101.1	hypothetical protein	CP006644.1	1372402	1374804	+	NX02_06855	2235678	36.0251	CckA
Sphingomonadales	Sphingomonas sanxanigenens DSM 19645 = NX02	GCA_000512205.2	AHE55751.1	chemotaxis protein CheY	CP006644.1	4331670	4332371	+	NX02_20550	5194946	83.7098	CtrA
Sphingomonadales	Sphingomonas sanxanigenens DSM 19645 = NX02	GCA_000512205.2	AHE51770.1	hypothetical protein	CP006644.1	83	1465	+	NX02_00005	863359	13.9119	DnaA
Sphingomonadales	Sphingomonas sanxanigenens DSM 19645 = NX02	GCA_000512205.2	AHE53188.1	hypothetical protein	CP006644.1	1463433	1464119	-	NX02_07310	2326709	37.4919	GcrA
Sphingomonadales	Sphingomonas taxi	GCA_000764535.1	AIT06108.1	histidine phosphotransferase	CP009571.1	1464612	1465256	+	MC45_06565	2120044	54.9362	ChpT
Sphingomonadales	Sphingomonas taxi	GCA_000764535.1	AIT07399.1	chromosome partitioning protein ParA	CP009571.1	3213233	3214021	+	MC45_14605	9566	0.247882	ParA
Sphingomonadales	Sphingomonas taxi	GCA_000764535.1	AIT06872.1	chemotaxis protein CheY	CP009571.1	2499978	2500673	+	MC45_11360	3155410	81.7655	CtrA
Sphingomonadales	Sphingomonas taxi	GCA_000764535.1	AIT07155.1	modification methylase	CP009571.1	2901990	2903141	-	MC45_13160	3557422	92.1827	CcrM
Sphingomonadales	Sphingomonas taxi	GCA_000764535.1	AIT05822.1	histidine kinase	CP009571.1	1059410	1061761	-	MC45_04715	1714842	44.4363	DivL
Sphingomonadales	Sphingomonas taxi	GCA_000764535.1	AIT06403.1	Clp protease ATP-binding protein	CP009571.1	1898424	1899695	-	MC45_08515	2553856	66.1775	ClpX
Sphingomonadales	Sphingomonas taxi	GCA_000764535.1	AIT05503.1	histidine kinase	CP009571.1	645531	647906	+	MC45_02795	1300963	33.7116	CckA
Sphingomonadales	Sphingomonas taxi	GCA_000764535.1	AIT05349.1	chromosomal replication initiator protein DnaA	CP009571.1	409861	411279	+	MC45_01805	1065293	27.6047	DnaA
Sphingomonadales	Sphingomonas taxi	GCA_000764535.1	AIT07400.1	chromosome partitioning protein ParB	CP009571.1	3214018	3214920	+	MC45_14610	10351	0.268223	ParB
Sphingomonadales	Sphingomonas wittichii DC-6	GCA_000715175.2	ARR56941.1	histidine phosphotransferase	CP021181.1	5860774	5861400	-	HY78_27615	3508055	59.2472	ChpT
Sphingomonadales	Sphingomonas wittichii DC-6	GCA_000715175.2	ARR52382.1	site-specific DNA-methyltransferase	CP021181.1	480485	481633	-	HY78_02365	4048818	68.38	CcrM
Sphingomonadales	Sphingomonas wittichii DC-6	GCA_000715175.2	ARR56245.1	ATP-dependent Clp protease ATP-binding subunit ClpX	CP021181.1	5023754	5025028	+	HY78_23705	2671035	45.1108	ClpX
Sphingomonadales	Sphingomonas wittichii DC-6	GCA_000715175.2	ARR53964.1	chromosome partitioning protein ParA	CP021181.1	2338219	2338998	-	HY78_11255	5906552	99.7551	ParA
Sphingomonadales	Sphingomonas wittichii DC-6	GCA_000715175.2	ARR54131.1	two-component sensor histidine kinase	CP021181.1	2513139	2515535	-	HY78_12135	160420	2.70932	DivL
Sphingomonadales	Sphingomonas wittichii DC-6	GCA_000715175.2	ARR56323.1	hybrid sensor histidine kinase/response regulator	CP021181.1	5113153	5115564	+	HY78_24130	2760434	46.6207	CckA
Sphingomonadales	Sphingomonas wittichii DC-6	GCA_000715175.2	ARR51981.1	DNA-binding response regulator	CP021181.1	30590	31285	+	HY78_00155	3598923	60.7818	CtrA
Sphingomonadales	Sphingomonas wittichii DC-6	GCA_000715175.2	ARR53963.1	chromosome partitioning protein ParB	CP021181.1	2337326	2338222	-	HY78_11250	5905659	99.74	ParB
Sphingomonadales	Sphingomonas wittichii DC-6	GCA_000715175.2	ARR51952.1	chromosomal replication initiation protein DnaA	CP021181.1	20	1453	-	HY78_00005	3568353	60.2655	DnaA
Sphingomonadales	Sphingomonas wittichii DC-6	GCA_000715175.2	ARR52378.1	GcrA cell cycle regulator	CP021181.1	476168	476827	+	HY78_02345	4044501	68.3071	GcrA
Sphingomonadales	Sphingomonas wittichii RW1	GCA_000016765.1	ABQ66436.1	Uncharacterized protein	CP000699.1	61351	61977	+	Swit_0063	2327901	43.2514	ChpT
Sphingomonadales	Sphingomonas wittichii RW1	GCA_000016765.1	ABQ69201.1	chromosome segregation ATPase	CP000699.1	3129868	3130647	+	Swit_2848	14157	0.263031	ParA
Sphingomonadales	Sphingomonas wittichii RW1	GCA_000016765.1	ABQ69031.1	PAS/PAC sensor signal transduction histidine kinase	CP000699.1	2954970	2957366	+	Swit_2675	5221520	97.0135	DivL
Sphingomonadales	Sphingomonas wittichii RW1	GCA_000016765.1	ABQ66960.1	ATP-dependent Clp protease%2C ATP-binding subunit ClpX	CP000699.1	643597	644871	-	Swit_0592	2910147	54.0692	ClpX
Sphingomonadales	Sphingomonas wittichii RW1	GCA_000016765.1	ABQ71191.1	two component transcriptional regulator%2C winged helix family	CP000699.1	5346728	5347423	-	Swit_4854	2231017	41.4513	CtrA
Sphingomonadales	Sphingomonas wittichii RW1	GCA_000016765.1	ABQ70914.1	DNA methylase N-4/N-6 domain protein	CP000699.1	5033515	5034663	+	Swit_4576	1917804	35.6319	CcrM
Sphingomonadales	Sphingomonas wittichii RW1	GCA_000016765.1	ABQ69202.1	chromosome segregation DNA-binding protein	CP000699.1	3130644	3131540	+	Swit_2849	14933	0.277448	ParB
Sphingomonadales	Sphingomonas wittichii RW1	GCA_000016765.1	ABQ66881.1	multi-sensor hybrid histidine kinase	CP000699.1	553697	556108	-	Swit_0513	2820247	52.3989	CckA
Sphingomonadales	Sphingomonas wittichii RW1	GCA_000016765.1	ABQ70918.1	GcrA cell cycle regulator	CP000699.1	5038320	5038979	-	Swit_4580	1922609	35.7212	GcrA
Sphingomonadales	Sphingomonas wittichii RW1	GCA_000016765.1	ABQ66374.1	chromosomal replication initiator protein DnaA	CP000699.1	245	1678	+	Swit_0001	2266795	42.116	DnaA
Sphingomonadales	Sphingopyxis alaskensis RB2256	GCA_000013985.1	ABF54561.1	chromosome segregation ATPase	CP000356.1	3005694	3006476	+	Sala_2856	10753	0.321449	ParA
Sphingomonadales	Sphingopyxis alaskensis RB2256	GCA_000013985.1	ABF53454.1	conserved hypothetical protein	CP000356.1	1834173	1834817	-	Sala_1741	2184402	65.3002	ChpT
Sphingomonadales	Sphingopyxis alaskensis RB2256	GCA_000013985.1	ABF54562.1	chromosome segregation DNA-binding protein	CP000356.1	3006477	3007436	+	Sala_2857	11536	0.344855	ParB
Sphingomonadales	Sphingopyxis alaskensis RB2256	GCA_000013985.1	ABF52284.1	two component transcriptional regulator%2C winged helix family	CP000356.1	576804	577511	+	Sala_0563	927033	27.7126	CtrA
Sphingomonadales	Sphingopyxis alaskensis RB2256	GCA_000013985.1	ABF54448.1	ATP-dependent Clp protease%2C ATP-binding subunit ClpX	CP000356.1	2891356	2892627	+	Sala_2743	3241585	96.9034	ClpX
Sphingomonadales	Sphingopyxis alaskensis RB2256	GCA_000013985.1	ABF51727.1	chromosomal replication initiator protein DnaA	CP000356.1	173	1534	+	Sala_0001	350402	10.4749	DnaA
Sphingomonadales	Sphingopyxis alaskensis RB2256	GCA_000013985.1	ABF53440.1	multi-sensor hybrid histidine kinase	CP000356.1	1816029	1818410	-	Sala_1727	2166258	64.7578	CckA
Sphingomonadales	Sphingopyxis alaskensis RB2256	GCA_000013985.1	ABF52811.1	GcrA cell cycle regulator	CP000356.1	1122753	1123445	-	Sala_1094	1472982	44.0331	GcrA
Sphingomonadales	Sphingopyxis alaskensis RB2256	GCA_000013985.1	ABF52683.1	DNA methylase N-4/N-6	CP000356.1	991065	992204	+	Sala_0965	1341294	40.0964	CcrM
Sphingomonadales	Sphingopyxis alaskensis RB2256	GCA_000013985.1	ABF51886.1	PAS/PAC sensor signal transduction histidine kinase	CP000356.1	161199	163562	-	Sala_0162	511428	15.2886	DivL
Sphingomonadales	Sphingopyxis fribergensis	GCA_000803645.1	AJA10463.1	PAS/PAC sensor signal transduction histidine kinase	CP009122.1	3805876	3808239	-	SKP52_17965	4412715	88.3677	DivL
Sphingomonadales	Sphingopyxis fribergensis	GCA_000803645.1	AJA09383.1	periplasmic sensor hybrid histidine kinase	CP009122.1	2653192	2655636	-	SKP52_12460	3260031	65.2844	CckA
Sphingomonadales	Sphingopyxis fribergensis	GCA_000803645.1	AJA10527.1	ATP-dependent Clp protease ATP-binding subunit ClpX	CP009122.1	3876646	3877917	+	SKP52_18285	4483485	89.7849	ClpX
Sphingomonadales	Sphingopyxis fribergensis	GCA_000803645.1	AJA09399.1	hypothetical protein	CP009122.1	2670321	2670977	-	SKP52_12540	3277160	65.6274	ChpT
Sphingomonadales	Sphingopyxis fribergensis	GCA_000803645.1	AJA08424.1	Modification methylase BabI	CP009122.1	1578301	1579440	+	SKP52_07515	2185140	43.759	CcrM
Sphingomonadales	Sphingopyxis fribergensis	GCA_000803645.1	AJA06954.1	Chromosomal replication initiator protein DnaA	CP009122.1	1	1362	+	SKP52_00005	606840	12.1524	DnaA
Sphingomonadales	Sphingopyxis fribergensis	GCA_000803645.1	AJA08861.1	GcrA cell cycle regulator	CP009122.1	2071778	2072473	+	SKP52_09770	2678617	53.6412	GcrA
Sphingomonadales	Sphingopyxis fribergensis	GCA_000803645.1	AJA11011.1	Chromosome partitioning protein ParA	CP009122.1	4376059	4376841	-	SKP52_20735	4982898	99.786	ParA
Sphingomonadales	Sphingopyxis fribergensis	GCA_000803645.1	AJA11010.1	Chromosome-partitioning protein ParB	CP009122.1	4375099	4376058	-	SKP52_20730	4981938	99.7668	ParB
Sphingomonadales	Sphingopyxis fribergensis	GCA_000803645.1	AJA10321.1	Cell cycle transcriptional regulator CtrA	CP009122.1	3658991	3659698	+	SKP52_17250	4265830	85.4262	CtrA
Sphingomonadales	Sphingopyxis macrogoltabida	GCA_001307295.1	ALH82641.1	chromosome partitioning protein ParA	CP012700.1	4365338	4366120	-	AN936_20455	4745628	99.7425	ParA
Sphingomonadales	Sphingopyxis macrogoltabida	GCA_001307295.1	ALH81856.1	histidine kinase	CP012700.1	3456697	3459060	+	AN936_16280	3836987	80.6449	DivL
Sphingomonadales	Sphingopyxis macrogoltabida	GCA_001307295.1	ALH82051.1	chemotaxis protein CheY	CP012700.1	3669658	3670365	+	AN936_17315	4049948	85.1209	CtrA
Sphingomonadales	Sphingopyxis macrogoltabida	GCA_001307295.1	ALH80653.1	modification methylase	CP012700.1	2047837	2048988	-	AN936_09805	2428127	51.0338	CcrM
Sphingomonadales	Sphingopyxis macrogoltabida	GCA_001307295.1	ALH81030.1	histidine phosphotransferase	CP012700.1	2482195	2482836	-	AN936_11830	2862485	60.163	ChpT
Sphingomonadales	Sphingopyxis macrogoltabida	GCA_001307295.1	ALH80514.1	GcrA cell cycle regulator	CP012700.1	1912239	1912919	+	AN936_09070	2292529	48.1838	GcrA
Sphingomonadales	Sphingopyxis macrogoltabida	GCA_001307295.1	ALH81016.1	histidine kinase	CP012700.1	2465373	2467829	-	AN936_11755	2845663	59.8095	CckA
Sphingomonadales	Sphingopyxis macrogoltabida	GCA_001307295.1	ALH81901.1	ATP-dependent Clp protease ATP-binding subunit ClpX	CP012700.1	3510774	3512042	+	AN936_16515	3891064	81.7815	ClpX
Sphingomonadales	Sphingopyxis macrogoltabida	GCA_001307295.1	ALH82640.1	chromosome partitioning protein ParB	CP012700.1	4364375	4365337	-	AN936_20450	4744665	99.7223	ParB
Sphingomonadales	Sphingopyxis macrogoltabida	GCA_001307295.1	ALH78815.1	chromosomal replication initiator DnaA	CP012700.1	506	1867	+	AN936_00015	380796	8.00348	DnaA
Sphingomonadales	Zymomonas mobilis subsp. mobilis NCIMB 11163	GCA_000024245.1	ACV76333.1	two component transcriptional regulator%2C winged helix family	CP001722.1	2098341	2099045	-	Za10_1799	727343	34.2316	CtrA
Sphingomonadales	Zymomonas mobilis subsp. mobilis NCIMB 11163	GCA_000024245.1	ACV75073.1	conserved hypothetical protein	CP001722.1	622555	623181	-	Za10_0524	1376328	64.7754	ChpT
Sphingomonadales	Zymomonas mobilis subsp. mobilis NCIMB 11163	GCA_000024245.1	ACV74902.1	ATP-dependent Clp protease%2C ATP-binding subunit ClpX	CP001722.1	404104	405372	-	Za10_0351	1157877	54.4942	ClpX
Sphingomonadales	Zymomonas mobilis subsp. mobilis NCIMB 11163	GCA_000024245.1	ACV75385.1	GcrA cell cycle regulator	CP001722.1	959362	960054	-	Za10_0838	1713135	80.6268	GcrA
Sphingomonadales	Zymomonas mobilis subsp. mobilis NCIMB 11163	GCA_000024245.1	ACV75734.1	Cobyrinic acid ac-diamide synthase	CP001722.1	1386203	1387003	+	Za10_1191	15205	0.715607	ParA
Sphingomonadales	Zymomonas mobilis subsp. mobilis NCIMB 11163	GCA_000024245.1	ACV74852.1	DNA methylase N-4/N-6 domain protein	CP001722.1	347149	348297	-	Za10_0300	1100922	51.8137	CcrM
Sphingomonadales	Zymomonas mobilis subsp. mobilis NCIMB 11163	GCA_000024245.1	ACV74768.1	histidine kinase	CP001722.1	251014	253401	+	Za10_0216	1004787	47.2892	DivL
Sphingomonadales	Zymomonas mobilis subsp. mobilis NCIMB 11163	GCA_000024245.1	ACV75205.1	histidine kinase	CP001722.1	771342	773777	-	Za10_0658	1525115	71.7779	CckA
Sphingomonadales	Zymomonas mobilis subsp. mobilis NCIMB 11163	GCA_000024245.1	ACV75735.1	parB-like partition protein	CP001722.1	1387000	1387935	+	Za10_1192	16002	0.753116	ParB
Sphingomonadales	Zymomonas mobilis subsp. mobilis NCIMB 11163	GCA_000024245.1	ACV74555.1	chromosomal replication initiator protein DnaA	CP001722.1	274	1728	+	Za10_0001	754047	35.4884	DnaA

## Sheet: Supplementary Table S3
Order	Species	Accession	ID	ProteinID	Product	Replicon	start	strand	LocusTag	Ostart	Pstart	Group
Rhodobacterales	Ruegeria pomeroyi DSS-3 (a-proteobacteria)	GCA_000011965.2	gene403	AAV93720.1	competence protein ComM	CP000031.2	414677	-	SPO0402	418265	10.1782	comM
Rhodobacterales	Ruegeria pomeroyi DSS-3 (a-proteobacteria)	GCA_000011965.2	gene2170	AAV95423.1	competence protein	CP000031.2	2290062	-	SPO2155	2293650	55.8142	comEC
Rhodobacterales	Ruegeria pomeroyi DSS-3 (a-proteobacteria)	GCA_000011965.2	gene3432	AAV96637.1	anti-sigma B factor%2C putative	CP000031.2	3611436	+	SPO3410	3615024	87.9688	rsbV/W
Rhodobacterales	Ruegeria pomeroyi DSS-3 (a-proteobacteria)	GCA_000011965.2	gene2169	AAV95422.1	LexA repressor	CP000031.2	2289359	+	SPO2154	2292947	55.7971	lexA
Rhodobacterales	Ruegeria pomeroyi DSS-3 (a-proteobacteria)	GCA_000011965.2	gene2049	AAV95306.1	RecA	CP000031.2	2161728	-	SPO2034	2165316	52.6913	recA
Rhodobacterales	Ruegeria pomeroyi DSS-3 (a-proteobacteria)	GCA_000011965.2	gene3431	AAV96636.1	anti-anti-sigma factor	CP000031.2	3611075	+	SPO3409	3614663	87.9601	rsbV/W
Rhodobacterales	Ruegeria pomeroyi DSS-3 (a-proteobacteria)	GCA_000011965.2	gene2122	AAV95378.1	hypothetical protein	CP000031.2	2243533	+	SPO2107	2247121	54.682	gafA
Rhodobacterales	Ruegeria pomeroyi DSS-3 (a-proteobacteria)	GCA_000011965.2	gene70	AAV93402.1	competence protein F%2C putative	CP000031.2	72738	-	SPO0071	76326	1.85733	comF
Rhodobacterales	Ruegeria pomeroyi DSS-3 (a-proteobacteria)	GCA_000011965.2	gene2121	AAV95377.1	hypothetical protein	CP000031.2	2242168	-	SPO2106	2245756	54.6488	gafA
Rhodobacterales	Roseobacter denitrificans OCh 114 (a-proteobacteria)	GCA_000014045.1	gene24	ABG29767.1	serine-protein kinase%2C putative	CP000362.1	27055	+	RD1_0027	3733107	90.3223	rsbV/W
Rhodobacterales	Roseobacter denitrificans OCh 114 (a-proteobacteria)	GCA_000014045.1	gene3026	ABG32718.1	LexA repressor	CP000362.1	3080979	+	RD1_3216	2653934	64.2118	lexA
Rhodobacterales	Roseobacter denitrificans OCh 114 (a-proteobacteria)	GCA_000014045.1	gene374	ABG30115.1	competence protein F%2C putative	CP000362.1	388587	-	RD1_0398	4094639	99.0695	comF
Rhodobacterales	Roseobacter denitrificans OCh 114 (a-proteobacteria)	GCA_000014045.1	gene2550	ABG32249.1	RecA protein	CP000362.1	2580309	-	RD1_2710	2153264	52.0981	recA
Rhodobacterales	Roseobacter denitrificans OCh 114 (a-proteobacteria)	GCA_000014045.1	gene3027	ABG32719.1	competence protein%2C putative	CP000362.1	3081674	-	RD1_3217	2654629	64.2286	comEC
Rhodobacterales	Roseobacter denitrificans OCh 114 (a-proteobacteria)	GCA_000014045.1	gene23	ABG29766.1	anti-anti-sigma factor%2C putative	CP000362.1	26690	+	RD1_0026	3732742	90.3134	rsbV/W
Rhodobacterales	Roseobacter denitrificans OCh 114 (a-proteobacteria)	GCA_000014045.1	gene1118	ABG30843.1	Mg chelatase-related protein	CP000362.1	1157150	-	RD1_1193	730105	17.6648	comM
Rhodobacterales	Roseobacter denitrificans OCh 114 (a-proteobacteria)	GCA_000014045.1	gene2608	ABG32306.1	conserved domain protein	CP000362.1	2645245	-	RD1_2775	2218200	53.6692	gafA
Rhodobacterales	Roseobacter denitrificans OCh 114 (a-proteobacteria)	GCA_000014045.1	gene2609	ABG32307.1	hypothetical protein	CP000362.1	2646693	+	RD1_2776	2219648	53.7042	gafA
Rhodobacterales	Rhodobacter sphaeroides ATCC 17029 (a-proteobacteria)	GCA_000015985.1	gene-Rsph17029_0150	ABN75270.1	putative anti-sigma regulatory factor%2C serine/threonine protein kinase	CP000577.1	167479	-	Rsph17029_0150	263174	8.36078	rsbV/W
Rhodobacterales	Rhodobacter sphaeroides ATCC 17029 (a-proteobacteria)	GCA_000015985.1	gene-Rsph17029_0707	ABN75820.1	SOS-response transcriptional repressor%2C LexA	CP000577.1	717373	-	Rsph17029_0707	813068	25.8304	lexA
Rhodobacterales	Rhodobacter sphaeroides ATCC 17029 (a-proteobacteria)	GCA_000015985.1	gene-Rsph17029_0706	ABN75819.1	ComEC/Rec2-related protein	CP000577.1	715263	+	Rsph17029_0706	810958	25.7633	comEC
Rhodobacterales	Rhodobacter sphaeroides ATCC 17029 (a-proteobacteria)	GCA_000015985.1	gene-Rsph17029_2856	ABN77958.1	competence protein F	CP000577.1	3013481	-	Rsph17029_2856	3109176	98.7755	comF
Rhodobacterales	Rhodobacter sphaeroides ATCC 17029 (a-proteobacteria)	GCA_000015985.1	gene-Rsph17029_0463	ABN75579.1	Mg chelatase%2C subunit ChlI	CP000577.1	482073	-	Rsph17029_0463	577768	18.3551	comM
Rhodobacterales	Rhodobacter sphaeroides ATCC 17029 (a-proteobacteria)	GCA_000015985.1	gene-Rsph17029_0151	ABN75271.1	anti-sigma-factor antagonist	CP000577.1	168011	-	Rsph17029_0151	263706	8.37768	rsbV/W
Rhodobacterales	Rhodobacter sphaeroides ATCC 17029 (a-proteobacteria)	GCA_000015985.1	gene-Rsph17029_2105	ABN77208.1	recA protein	CP000577.1	2229523	-	Rsph17029_2105	2325218	73.8699	recA
Rhodobacterales	Rhodobacter sphaeroides ATCC 17029 (a-proteobacteria)	GCA_000015985.1	gene-Rsph17029_1483	ABN76593.1	hypothetical protein	CP000577.1	1546200	-	Rsph17029_1483	1641895	52.1614	gafA
Rhodobacterales	Dinoroseobacter shibae DFL 12 = DSM 16493 (a-proteobacteria)	GCA_000018145.1	gene1830	ABV93546.1	putative competence protein	CP000830.1	1875927	-	Dshi_1804	2032136	53.6243	comEC
Rhodobacterales	Dinoroseobacter shibae DFL 12 = DSM 16493 (a-proteobacteria)	GCA_000018145.1	gene69	ABV91821.1	serine-protein kinase	CP000830.1	72738	-	Dshi_0072	228947	6.04148	rsbV/W
Rhodobacterales	Dinoroseobacter shibae DFL 12 = DSM 16493 (a-proteobacteria)	GCA_000018145.1	gene1829	ABV93545.1	lexA repressor	CP000830.1	1875043	+	Dshi_1803	2031252	53.6009	lexA
Rhodobacterales	Dinoroseobacter shibae DFL 12 = DSM 16493 (a-proteobacteria)	GCA_000018145.1	gene1665	ABV93385.1	bacterial DNA recombination	CP000830.1	1704693	-	Dshi_1643	1860902	49.1057	recA
Rhodobacterales	Dinoroseobacter shibae DFL 12 = DSM 16493 (a-proteobacteria)	GCA_000018145.1	gene70	ABV91822.1	anti-sigma-factor antagonist	CP000830.1	73262	-	Dshi_0073	229471	6.05531	rsbV/W
Rhodobacterales	Dinoroseobacter shibae DFL 12 = DSM 16493 (a-proteobacteria)	GCA_000018145.1	gene2865	ABV94561.1	conserved hypothetical protein	CP000830.1	2983768	+	Dshi_2828	3139977	82.8581	comM
Rhodobacterales	Dinoroseobacter shibae DFL 12 = DSM 16493 (a-proteobacteria)	GCA_000018145.1	gene3539	ABV95233.1	competence protein F	CP000830.1	3680913	+	Dshi_3500	47538	1.25444	comF
Rhodobacterales	Dinoroseobacter shibae DFL 12 = DSM 16493 (a-proteobacteria)	GCA_000018145.1	gene1606	ABV93327.1	conserved hypothetical protein	CP000830.1	1651121	+	Dshi_1585	1807330	47.692	gafA
Rhodobacterales	Dinoroseobacter shibae DFL 12 = DSM 16493 (a-proteobacteria)	GCA_000018145.1	gene1605	ABV93326.1	conserved hypothetical protein	CP000830.1	1649803	-	Dshi_1584	1806012	47.6573	gafA
Rhodobacterales	Rhodobacter capsulatus SB 1003 (a-proteobacteria)	GCA_000021865.1	gene3367	ADE87048.1	anti-sigma regulatory factor	CP001312.1	3514971	+	RCAP_rcc03324	3438382	91.961	rsbV/W
Rhodobacterales	Rhodobacter capsulatus SB 1003 (a-proteobacteria)	GCA_000021865.1	gene2389	ADE86091.1	LexA repressor	CP001312.1	2530337	+	RCAP_rcc02361	2453748	65.6265	lexA
Rhodobacterales	Rhodobacter capsulatus SB 1003 (a-proteobacteria)	GCA_000021865.1	gene205	ADE83962.1	competence protein F	CP001312.1	233277	+	RCAP_rcc00197	156688	4.19069	comF
Rhodobacterales	Rhodobacter capsulatus SB 1003 (a-proteobacteria)	GCA_000021865.1	gene1775	ADE85496.1	RecA protein	CP001312.1	1892499	+	RCAP_rcc01751	1815910	48.5673	recA
Rhodobacterales	Rhodobacter capsulatus SB 1003 (a-proteobacteria)	GCA_000021865.1	gene2390	ADE86092.1	competence protein	CP001312.1	2531047	-	RCAP_rcc02362	2454458	65.6455	comEC
Rhodobacterales	Rhodobacter capsulatus SB 1003 (a-proteobacteria)	GCA_000021865.1	gene470	ADE84225.1	competence protein ComM	CP001312.1	492605	+	RCAP_rcc00460	416016	11.1265	comM
Rhodobacterales	Rhodobacter capsulatus SB 1003 (a-proteobacteria)	GCA_000021865.1	gene3366	ADE87047.1	anti-sigma-factor antagonist	CP001312.1	3514634	+	RCAP_rcc03323	3438045	91.952	rsbV/W
Rhodobacterales	Rhodobacter capsulatus SB 1003 (a-proteobacteria)	GCA_000021865.1	gene1890	ADE85611.1	conserved hypothetical protein	CP001312.1	2020352	+	RCAP_rcc01866	1943763	51.9868	gafA
Rhodobacterales	Rhodobacter capsulatus SB 1003 (a-proteobacteria)	GCA_000021865.1	gene1889	ADE85610.1	conserved hypothetical protein	CP001312.1	2018987	-	RCAP_rcc01865	1942398	51.9502	gafA
Rhodobacterales	Phaeobacter inhibens 2.10 (a-proteobacteria)	GCA_000154745.2	gene3145	AFO89110.1	putative serine-protein kinase	CP002972.1	3418362	+	PGA2_c31470	3553240	94.5445	rsbV/W
Rhodobacterales	Phaeobacter inhibens 2.10 (a-proteobacteria)	GCA_000154745.2	gene3291	AFO89254.1	phosphoribosyl transferase-like protein	CP002972.1	3579050	-	PGA2_c32930	3713928	98.82	comF
Rhodobacterales	Phaeobacter inhibens 2.10 (a-proteobacteria)	GCA_000154745.2	gene1675	AFO87674.1	lexA repressor	CP002972.1	1854074	+	PGA2_c16770	1988952	52.922	lexA
Rhodobacterales	Phaeobacter inhibens 2.10 (a-proteobacteria)	GCA_000154745.2	gene3144	AFO89109.1	putative anti-sigma-B factor antagonist	CP002972.1	3417982	+	PGA2_c31460	3552860	94.5344	rsbV/W
Rhodobacterales	Phaeobacter inhibens 2.10 (a-proteobacteria)	GCA_000154745.2	gene2471	AFO88455.1	putative magnesium chelatase	CP002972.1	2728395	+	PGA2_c24730	2863273	76.1859	comM
Rhodobacterales	Phaeobacter inhibens 2.10 (a-proteobacteria)	GCA_000154745.2	gene1676	AFO87675.1	hypothetical protein	CP002972.1	1855053	-	PGA2_c16780	1989931	52.948	comEC
Rhodobacterales	Phaeobacter inhibens 2.10 (a-proteobacteria)	GCA_000154745.2	gene1454	AFO87459.1	hypothetical protein	CP002972.1	1606825	+	PGA2_c14550	1741703	46.3432	gafA
Rhodobacterales	Phaeobacter inhibens 2.10 (a-proteobacteria)	GCA_000154745.2	gene1514	AFO87518.1	protein RecA	CP002972.1	1676012	+	PGA2_c15150	1810890	48.1841	recA
Rhodobacterales	Roseobacter litoralis Och 149 (a-proteobacteria)	GCA_000154785.2	gene3889	AEI95819.1	putative serine-protein kinase	CP002623.1	3969459	+	RLO149_c039170	4263752	94.6405	rsbV/W
Rhodobacterales	Roseobacter litoralis Och 149 (a-proteobacteria)	GCA_000154785.2	gene3888	AEI95818.1	putative anti-sigma-factor antagonist	CP002623.1	3969094	+	RLO149_c039160	4263387	94.6323	rsbV/W
Rhodobacterales	Roseobacter litoralis Och 149 (a-proteobacteria)	GCA_000154785.2	gene2419	AEI94404.1	repressor LexA	CP002623.1	2495033	+	RLO149_c024360	2789326	61.9133	lexA
Rhodobacterales	Roseobacter litoralis Och 149 (a-proteobacteria)	GCA_000154785.2	gene1767	AEI93770.1	hypothetical protein	CP002623.1	1828700	-	RLO149_c017800	2122993	47.1231	gafA
Rhodobacterales	Roseobacter litoralis Och 149 (a-proteobacteria)	GCA_000154785.2	gene3565	AEI95525.1	magnesium chelatase	CP002623.1	3640727	+	RLO149_c035860	3935020	87.3437	comM
Rhodobacterales	Roseobacter litoralis Och 149 (a-proteobacteria)	GCA_000154785.2	gene2420	AEI94405.1	competence protein ComE-like protein	CP002623.1	2495728	-	RLO149_c024370	2790021	61.9288	comEC
Rhodobacterales	Roseobacter litoralis Och 149 (a-proteobacteria)	GCA_000154785.2	gene4170	AEI96097.1	ComF/GntX-like protein	CP002623.1	4249000	+	RLO149_c042010	38082	0.845288	comF
Rhodobacterales	Roseobacter litoralis Och 149 (a-proteobacteria)	GCA_000154785.2	gene1768	AEI93771.1	hypothetical protein	CP002623.1	1829323	+	RLO149_c017810	2123616	47.1369	gafA
Rhodobacterales	Roseobacter litoralis Och 149 (a-proteobacteria)	GCA_000154785.2	gene1827	AEI93829.1	protein RecA	CP002623.1	1894928	+	RLO149_c018400	2189221	48.5931	recA
Rhodobacterales	Octadecabacter antarcticus 307 (a-proteobacteria)	GCA_000155675.2	gene2197	AGI67835.1	LexA repressor	CP003740.1	2206009	-	OAN307_c22080	2284932	47.4781	lexA
Rhodobacterales	Octadecabacter antarcticus 307 (a-proteobacteria)	GCA_000155675.2	gene2504	AGI68122.1	hypothetical protein	CP003740.1	2538948	-	OAN307_c25170	2617871	54.3962	gafA
Rhodobacterales	Octadecabacter antarcticus 307 (a-proteobacteria)	GCA_000155675.2	gene3565	AGI69063.1	protein RecA	CP003740.1	3536417	-	OAN307_c35900	3615340	75.1224	recA
Rhodobacterales	Octadecabacter antarcticus 307 (a-proteobacteria)	GCA_000155675.2	gene2196	AGI67834.1	competence protein E-like protein	CP003740.1	2203915	+	OAN307_c22070	2282838	47.4346	comEC
Rhodobacterales	Octadecabacter antarcticus 307 (a-proteobacteria)	GCA_000155675.2	gene3865	AGI69333.1	magnesium chelatase	CP003740.1	3833176	+	OAN307_c38970	3912099	81.2887	comM
Rhodobacterales	Octadecabacter antarcticus 307 (a-proteobacteria)	GCA_000155675.2	gene4641	AGI70029.1	putative ComF/GntX family protein	CP003740.1	4608258	-	OAN307_c46800	4687181	97.3939	comF
Rhodobacterales	Octadecabacter arcticus 238 (a-proteobacteria)	GCA_000155735.2	gene1379	AGI71535.1	protein RecA	CP003742.1	1440186	+	OA238_c13810	1934888	37.2074	recA
Rhodobacterales	Octadecabacter arcticus 238 (a-proteobacteria)	GCA_000155735.2	gene1215	AGI71388.1	repressor LexA	CP003742.1	1267264	-	OA238_c12170	1761966	33.8821	lexA
Rhodobacterales	Octadecabacter arcticus 238 (a-proteobacteria)	GCA_000155735.2	gene470	AGI70718.1	magnesium chelatase	CP003742.1	486093	-	OA238_c04720	980795	18.8604	comM
Rhodobacterales	Octadecabacter arcticus 238 (a-proteobacteria)	GCA_000155735.2	gene1902	AGI72009.1	hypothetical protein	CP003742.1	2001308	+	OA238_c19040	2496010	47.9976	gafA
Rhodobacterales	Octadecabacter arcticus 238 (a-proteobacteria)	GCA_000155735.2	gene4451	AGI74338.1	ComF/GntX family-like protein	CP003742.1	4743766	+	OA238_c44590	38189	0.734364	comF
Rhodobacterales	Octadecabacter arcticus 238 (a-proteobacteria)	GCA_000155735.2	gene4588	AGI74455.1	putative anti-sigma-factor antagonist	CP003742.1	4906127	-	OA238_c45960	200550	3.85652	rsbV/W
Rhodobacterales	Ketogulonicigenium vulgare Y25 (a-proteobacteria)	GCA_000164885.1	gene1703	ADO42826.1	conserved hypothetical protein	CP002224.1	1638113	+	EIO_1704	1752544	63.1301	gafA
Rhodobacterales	Ketogulonicigenium vulgare Y25 (a-proteobacteria)	GCA_000164885.1	gene240	ADO41426.1	Mg chelatase-related protein	CP002224.1	218357	-	EIO_0241	332788	11.9877	comM
Rhodobacterales	Ketogulonicigenium vulgare Y25 (a-proteobacteria)	GCA_000164885.1	gene1096	ADO42244.1	LexA repressor	CP002224.1	1060054	-	EIO_1097	1174485	42.3073	lexA
Rhodobacterales	Ketogulonicigenium vulgare Y25 (a-proteobacteria)	GCA_000164885.1	gene1702	ADO42825.1	conserved hypothetical protein	CP002224.1	1636816	-	EIO_1703	1751247	63.0834	gafA
Rhodobacterales	Ketogulonicigenium vulgare Y25 (a-proteobacteria)	GCA_000164885.1	gene1475	ADO42608.1	recombinase A	CP002224.1	1419901	-	EIO_1476	1534332	55.2697	recA
Rhodobacterales	Ketogulonicigenium vulgare Y25 (a-proteobacteria)	GCA_000164885.1	gene2724	ADO43800.1	Competence protein F	CP002224.1	2633107	-	EIO_2726	2747538	98.9717	comF
Rhodobacterales	Phaeobacter gallaeciensis DSM 26640 (a-proteobacteria)	GCA_000511385.1	gene3359	AHD11098.1	Anti-sigma regulatory factor (Ser/Thr protein kinase)	CP006966.1	3435033	+	Gal_03379	3569595	94.5174	rsbV/W
Rhodobacterales	Phaeobacter gallaeciensis DSM 26640 (a-proteobacteria)	GCA_000511385.1	gene753	AHD08542.1	Mg chelatase-related protein	CP006966.1	762988	-	Gal_00760	897550	23.7658	comM
Rhodobacterales	Phaeobacter gallaeciensis DSM 26640 (a-proteobacteria)	GCA_000511385.1	gene1636	AHD09408.1	SOS-response transcriptional repressor%2C LexA	CP006966.1	1676598	-	Gal_01649	1811160	47.9567	lexA
Rhodobacterales	Phaeobacter gallaeciensis DSM 26640 (a-proteobacteria)	GCA_000511385.1	gene1923	AHD09689.1	hypothetical protein	CP006966.1	1965555	+	Gal_01937	2100117	55.6079	gafA
Rhodobacterales	Phaeobacter gallaeciensis DSM 26640 (a-proteobacteria)	GCA_000511385.1	gene1635	AHD09407.1	ComEC/Rec2-related protein	CP006966.1	1674211	+	Gal_01648	1808773	47.8935	comEC
Rhodobacterales	Phaeobacter gallaeciensis DSM 26640 (a-proteobacteria)	GCA_000511385.1	gene3358	AHD11097.1	anti-anti-sigma factor	CP006966.1	3434653	+	Gal_03378	3569215	94.5074	rsbV/W
Rhodobacterales	Phaeobacter gallaeciensis DSM 26640 (a-proteobacteria)	GCA_000511385.1	gene1922	AHD09688.1	hypothetical protein	CP006966.1	1964242	-	Gal_01936	2098804	55.5731	gafA
Rhodobacterales	Phaeobacter gallaeciensis DSM 26640 (a-proteobacteria)	GCA_000511385.1	gene1862	AHD09629.1	protein RecA	CP006966.1	1895096	-	Gal_01875	2029658	53.7422	recA
Rhodobacterales	Phaeobacter gallaeciensis DSM 26640 (a-proteobacteria)	GCA_000511385.1	gene3517	AHD11254.1	putative amidophosphoribosyltransferase	CP006966.1	3597751	-	Gal_03540	3732313	98.8259	comF
Rhodobacterales	Planktomarina temperata RCA23 (a-proteobacteria)	GCA_000738435.1	gene1609	AII87153.1	protein RecA	CP003984.1	1740119	-	RCA23_c16160	1807197	54.9614	recA
Rhodobacterales	Planktomarina temperata RCA23 (a-proteobacteria)	GCA_000738435.1	gene1482	AII87028.1	hypothetical protein competence protein E	CP003984.1	1603619	+	RCA23_c14890	1670697	50.8101	comEC
Rhodobacterales	Planktomarina temperata RCA23 (a-proteobacteria)	GCA_000738435.1	gene3063	AII88578.1	hypothetical protein%2C ComF/GntX family	CP003984.1	3254684	+	RCA23_c30780	33640	1.02308	comF
Rhodobacterales	Planktomarina temperata RCA23 (a-proteobacteria)	GCA_000738435.1	gene1557	AII87101.1	hypothetical protein	CP003984.1	1683982	+	RCA23_c15640	1751060	53.2541	gafA
Rhodobacterales	Planktomarina temperata RCA23 (a-proteobacteria)	GCA_000738435.1	gene1483	AII87029.1	LexA repressor	CP003984.1	1605667	-	RCA23_c14900	1672745	50.8724	lexA
Rhodobacterales	Marinovum algicola DG 898 (a-proteobacteria)	GCA_001046955.1	gene3026	AKO98192.1	Mg chelatase-related protein	CP010855.1	3107617	+	MALG_03044	3160617	84.8003	comM
Rhodobacterales	Marinovum algicola DG 898 (a-proteobacteria)	GCA_001046955.1	gene1415	AKO96611.1	hypothetical protein	CP010855.1	1462106	-	MALG_01426	1515106	40.6507	gafA
Rhodobacterales	Marinovum algicola DG 898 (a-proteobacteria)	GCA_001046955.1	gene2979	AKO98146.1	Anti-sigma regulatory factor (Ser/Thr protein kinase)	CP010855.1	3056435	+	MALG_02997	3109435	83.427	rsbV/W
Rhodobacterales	Marinovum algicola DG 898 (a-proteobacteria)	GCA_001046955.1	gene2039	AKO97219.1	ComEC/Rec2-related protein	CP010855.1	2121199	-	MALG_02051	2174199	58.3344	comEC
Rhodobacterales	Marinovum algicola DG 898 (a-proteobacteria)	GCA_001046955.1	gene1555	AKO96744.1	protein RecA	CP010855.1	1611296	+	MALG_01566	1664296	44.6535	recA
Rhodobacterales	Marinovum algicola DG 898 (a-proteobacteria)	GCA_001046955.1	gene1416	AKO96612.1	hypothetical protein	CP010855.1	1462596	+	MALG_01427	1515596	40.6639	gafA
Rhodobacterales	Marinovum algicola DG 898 (a-proteobacteria)	GCA_001046955.1	gene2978	AKO98145.1	anti-anti-sigma factor	CP010855.1	3056074	+	MALG_02996	3109074	83.4174	rsbV/W
Rhodobacterales	Marinovum algicola DG 898 (a-proteobacteria)	GCA_001046955.1	gene3507	AKO98669.1	putative amidophosphoribosyltransferase	CP010855.1	3613060	-	MALG_03526	3666060	98.3614	comF
Rhodobacterales	Marinovum algicola DG 898 (a-proteobacteria)	GCA_001046955.1	gene2038	AKO97218.1	SOS regulatory protein LexA	CP010855.1	2120494	+	MALG_02050	2173494	58.3155	lexA
Rhodobacterales	Octadecabacter temperatus (a-proteobacteria)	GCA_001187845.1	gene1331	AKS45886.1	recombinase A	CP012160.1	1285739	+	OSB_13330	1376425	42.5733	recA
Rhodobacterales	Octadecabacter temperatus (a-proteobacteria)	GCA_001187845.1	gene1664	AKS46214.1	ComEC family competence protein	CP012160.1	1635149	-	OSB_16660	1725835	53.3807	comEC
Rhodobacterales	Octadecabacter temperatus (a-proteobacteria)	GCA_001187845.1	gene1411	AKS45965.1	hypothetical protein	CP012160.1	1368789	-	OSB_14130	1459475	45.1421	gafA
Rhodobacterales	Octadecabacter temperatus (a-proteobacteria)	GCA_001187845.1	gene3171	AKS47692.1	DNA utilization protein GntX	CP012160.1	3110014	-	OSB_31790	3200700	98.9988	comF
Rhodobacterales	Octadecabacter temperatus (a-proteobacteria)	GCA_001187845.1	gene1412	AKS45966.1	hypothetical protein	CP012160.1	1369333	+	OSB_14140	1460019	45.1589	gafA
Rhodobacterales	Octadecabacter temperatus (a-proteobacteria)	GCA_001187845.1	gene521	AKS45085.1	Competence protein ComM	CP012160.1	479254	-	OSB_05220	569940	17.6285	comM
Rhodobacterales	Octadecabacter temperatus (a-proteobacteria)	GCA_001187845.1	gene1663	AKS46213.1	LexA repressor	CP012160.1	1634445	+	OSB_16650	1725131	53.3589	lexA
Rhodobacterales	Celeribacter marinus (a-proteobacteria)	GCA_001308265.1	gene1961	ALI55879.1	serine-protein kinase RsbW	CP012023.1	1893908	-	IMCC12053_1932	158528	5.11925	rsbV/W
Rhodobacterales	Celeribacter marinus (a-proteobacteria)	GCA_001308265.1	gene738	ALI54679.1	SOS-response repressor and protease LexA	CP012023.1	741191	+	IMCC12053_731	2102516	67.8953	lexA
Rhodobacterales	Celeribacter marinus (a-proteobacteria)	GCA_001308265.1	gene739	ALI54680.1	DNA internalization-related competence protein ComEC/Rec2	CP012023.1	741895	-	IMCC12053_732	2103220	67.918	comEC
Rhodobacterales	Celeribacter marinus (a-proteobacteria)	GCA_001308265.1	gene616	ALI54558.1	hypothetical protein	CP012023.1	611054	+	IMCC12053_610	1972379	63.6928	gafA
Rhodobacterales	Celeribacter marinus (a-proteobacteria)	GCA_001308265.1	gene649	ALI54591.1	RecA protein	CP012023.1	645083	-	IMCC12053_643	2006408	64.7917	recA
Rhodobacterales	Celeribacter marinus (a-proteobacteria)	GCA_001308265.1	gene615	ALI54557.1	glutamate synthase [NADPH] large chain	CP012023.1	609553	-	IMCC12053_609	1970878	63.6444	gafA
Rhodobacterales	Celeribacter marinus (a-proteobacteria)	GCA_001308265.1	gene3033	ALI56932.1	MG(2+) CHELATASE FAMILY PROTEIN / ComM-related protein	CP012023.1	2931171	+	IMCC12053_2985	1195791	38.6149	comM
Rhodobacterales	Celeribacter marinus (a-proteobacteria)	GCA_001308265.1	gene1962	ALI55880.1	Anti-sigma F factor antagonist	CP012023.1	1894374	-	IMCC12053_1933	158994	5.1343	rsbV/W
Rhodobacterales	Pannonibacter phragmitetus (a-proteobacteria)	GCA_001484065.1	gene1662	ALV27074.1	phosphoribosyltransferase	CP013068.1	1779800	+	APZ00_08315	386848	7.27336	comF
Rhodobacterales	Pannonibacter phragmitetus (a-proteobacteria)	GCA_001484065.1	gene1273	ALV26753.1	AAA family ATPase	CP013068.1	1358372	+	APZ00_06370	5284116	99.3498	comM
Rhodobacterales	Pannonibacter phragmitetus (a-proteobacteria)	GCA_001484065.1	gene3032	ALV28236.1	DNA recombination/repair protein RecA	CP013068.1	3310534	+	APZ00_15160	1917582	36.0536	recA
Rhodobacterales	Pannonibacter phragmitetus (a-proteobacteria)	GCA_001484065.1	gene3539	ALV28664.1	hypothetical protein	CP013068.1	3865943	+	APZ00_17695	2472991	46.4962	comEC
Rhodobacterales	Pannonibacter phragmitetus (a-proteobacteria)	GCA_001484065.1	gene3586	ALV28700.1	LexA family transcriptional regulator	CP013068.1	3917589	-	APZ00_17930	2524637	47.4672	lexA
Rhodobacterales	Rhodovulum sulfidophilum (a-proteobacteria)	GCA_001548075.1	gene3648	BAQ70781.1	serine/threonine protein kinase	AP014800.1	3778166	+	NHU_03649	4063289	91.219	rsbV/W
Rhodobacterales	Rhodovulum sulfidophilum (a-proteobacteria)	GCA_001548075.1	gene2425	BAQ69577.1	competence protein	AP014800.1	2534745	-	NHU_02426	2819868	63.3048	comEC
Rhodobacterales	Rhodovulum sulfidophilum (a-proteobacteria)	GCA_001548075.1	gene2407	BAQ69559.1	protein RecA	AP014800.1	2514304	-	NHU_02408	2799427	62.8459	recA
Rhodobacterales	Rhodovulum sulfidophilum (a-proteobacteria)	GCA_001548075.1	gene3647	BAQ70780.1	anti-sigma-factor antagonist	AP014800.1	3777825	+	NHU_03648	4062948	91.2114	rsbV/W
Rhodobacterales	Rhodovulum sulfidophilum (a-proteobacteria)	GCA_001548075.1	gene4012	BAQ71136.1	competence protein F	AP014800.1	4135145	-	NHU_04013	4420268	99.233	comF
Rhodobacterales	Rhodovulum sulfidophilum (a-proteobacteria)	GCA_001548075.1	gene2105	BAQ69260.1	hypothetical protein	AP014800.1	2205697	+	NHU_02106	2490820	55.9178	gafA
Rhodobacterales	Rhodovulum sulfidophilum (a-proteobacteria)	GCA_001548075.1	gene2424	BAQ69576.1	LexA repressor	AP014800.1	2534107	+	NHU_02425	2819230	63.2904	lexA
Rhodobacterales	Rhodovulum sulfidophilum (a-proteobacteria)	GCA_001548075.1	gene767	BAQ67936.1	Mg chelatase family protein	AP014800.1	763727	-	NHU_00768	1048850	23.5462	comM
Rhodobacterales	Rhodovulum sulfidophilum (a-proteobacteria)	GCA_001548075.1	gene2104	BAQ69259.1	hypothetical protein	AP014800.1	2204354	-	NHU_02105	2489477	55.8876	gafA
Rhodobacterales	Defluviimonas alba (a-proteobacteria)	GCA_001620265.1	gene1965	AMY69215.1	ComEC/Rec2-related protein	CP012661.1	1948886	-	AKL17_1966	2205307	46.5422	comEC
Rhodobacterales	Defluviimonas alba (a-proteobacteria)	GCA_001620265.1	gene4659	AMY71870.1	anti-sigma regulatory factor	CP012661.1	4614326	-	AKL17_4660	132449	2.79529	rsbV/W
Rhodobacterales	Defluviimonas alba (a-proteobacteria)	GCA_001620265.1	gene1423	AMY68678.1	LexA repressor	CP012661.1	1400981	-	AKL17_1424	1657402	34.9788	lexA
Rhodobacterales	Defluviimonas alba (a-proteobacteria)	GCA_001620265.1	gene4660	AMY71871.1	anti-sigma-factor antagonist	CP012661.1	4614798	-	AKL17_4661	132921	2.80525	rsbV/W
Rhodobacterales	Defluviimonas alba (a-proteobacteria)	GCA_001620265.1	gene2432	AMY69678.1	recombinase A	CP012661.1	2426019	-	AKL17_2433	2682440	56.6119	recA
Rhodobacterales	Defluviimonas alba (a-proteobacteria)	GCA_001620265.1	gene1422	AMY68677.1	hypothetical protein	CP012661.1	1399826	+	AKL17_1423	1656247	34.9545	gafA
Rhodobacterales	Defluviimonas alba (a-proteobacteria)	GCA_001620265.1	gene1421	AMY68676.1	hypothetical protein	CP012661.1	1399260	-	AKL17_1422	1655681	34.9425	gafA
Rhodobacterales	Defluviimonas alba (a-proteobacteria)	GCA_001620265.1	gene614	AMY67875.1	competence protein ComM	CP012661.1	591539	-	AKL17_0615	847960	17.8959	comM
Rhodobacterales	Defluviimonas alba (a-proteobacteria)	GCA_001620265.1	gene4575	AMY71788.1	competence protein F	CP012661.1	4522188	+	AKL17_4576	40311	0.850749	comF
Rhodobacterales	Yangia sp. CCB-MM3 (a-proteobacteria)	GCA_001687105.1	gene1502	ANT61497.1	competence protein ComF	CP014595.1	1555070	-	AYJ57_07520	2859957	98.5455	comF
Rhodobacterales	Yangia sp. CCB-MM3 (a-proteobacteria)	GCA_001687105.1	gene457	ANT59294.1	hypothetical protein	CP014595.1	473373	-	AYJ57_02295	1778260	61.2735	gafA
Rhodobacterales	Yangia sp. CCB-MM3 (a-proteobacteria)	GCA_001687105.1	gene1155	ANT59922.1	AAA family ATPase	CP014595.1	1186321	+	AYJ57_05785	2491208	85.8395	comM
Rhodobacterales	Yangia sp. CCB-MM3 (a-proteobacteria)	GCA_001687105.1	gene266	ANT59118.1	repressor LexA	CP014595.1	277140	+	AYJ57_01340	1582027	54.5119	lexA
Rhodobacterales	Yangia sp. CCB-MM3 (a-proteobacteria)	GCA_001687105.1	gene267	ANT59119.1	competence protein	CP014595.1	277835	-	AYJ57_01345	1582722	54.5358	comEC
Rhodobacterales	Yangia sp. CCB-MM3 (a-proteobacteria)	GCA_001687105.1	gene2745	ANT61341.1	DNA recombination/repair protein RecA	CP014595.1	2865833	+	AYJ57_13735	1268550	43.7104	recA
Rhodobacterales	Rhodobaca barguzinensis (a-proteobacteria)	GCA_001870665.2	gene3036	ATX66996.1	DUF4131 domain-containing protein	CP024899.1	3121362	-	BG454_15185	2775487	71.1769	comEC
Rhodobacterales	Rhodobaca barguzinensis (a-proteobacteria)	GCA_001870665.2	gene1628	ATX67760.1	helix-turn-helix domain containing protein	CP024899.1	1707348	+	BG454_08145	1361473	34.9148	gafA
Rhodobacterales	Rhodobaca barguzinensis (a-proteobacteria)	GCA_001870665.2	gene3264	ATX67187.1	ATP-binding protein	CP024899.1	3365722	-	BG454_16325	3019847	77.4435	rsbV/W
Rhodobacterales	Rhodobaca barguzinensis (a-proteobacteria)	GCA_001870665.2	gene3265	ATX67188.1	anti-sigma factor antagonist	CP024899.1	3366270	-	BG454_16330	3020395	77.4576	rsbV/W
Rhodobacterales	Rhodobaca barguzinensis (a-proteobacteria)	GCA_001870665.2	gene3292	ATX67210.1	ComF family protein	CP024899.1	3395906	+	BG454_16465	3050031	78.2176	comF
Rhodobacterales	Rhodobaca barguzinensis (a-proteobacteria)	GCA_001870665.2	gene2333	ATX66392.1	ATP-binding protein	CP024899.1	2434680	-	BG454_11670	2088805	53.5671	comM
Rhodobacterales	Rhodobaca barguzinensis (a-proteobacteria)	GCA_001870665.2	gene2063	ATX66163.1	recombinase RecA	CP024899.1	2158061	+	BG454_10320	1812186	46.4732	recA
Rhodobacterales	Rhodobaca barguzinensis (a-proteobacteria)	GCA_001870665.2	gene1627	ATX65800.1	hypothetical protein	CP024899.1	1706794	-	BG454_08140	1360919	34.9006	gafA
Rhodobacterales	Rhodobaca barguzinensis (a-proteobacteria)	GCA_001870665.2	gene1185	ATX65421.1	transcriptional repressor LexA	CP024899.1	1249496	-	BG454_05930	903621	23.1732	lexA
Rhodobacterales	Sulfitobacter sp. AM1-D1 (a-proteobacteria)	GCA_001886735.1	gene1603	APE43366.1	recombinase RecA	CP018076.1	1667945	+	BOO69_08020	1807501	47.0678	recA
Rhodobacterales	Sulfitobacter sp. AM1-D1 (a-proteobacteria)	GCA_001886735.1	gene3319	APE44839.1	hypothetical protein	CP018076.1	3408753	+	BOO69_16600	3548309	92.3989	rsbV/W
Rhodobacterales	Sulfitobacter sp. AM1-D1 (a-proteobacteria)	GCA_001886735.1	gene3659	APE45148.1	amidophosphoribosyltransferase	CP018076.1	3773880	+	BOO69_18300	73227	1.90685	comF
Rhodobacterales	Sulfitobacter sp. AM1-D1 (a-proteobacteria)	GCA_001886735.1	gene3191	APE44735.1	AAA family ATPase	CP018076.1	3275565	+	BOO69_15960	3415121	88.9306	comM
Rhodobacterales	Sulfitobacter sp. AM1-D1 (a-proteobacteria)	GCA_001886735.1	gene1531	APE43308.1	helix-turn-helix domain containing protein	CP018076.1	1587567	+	BOO69_07660	1727123	44.9747	gafA
Rhodobacterales	Sulfitobacter sp. AM1-D1 (a-proteobacteria)	GCA_001886735.1	gene1378	APE43171.1	repressor LexA	CP018076.1	1433485	-	BOO69_06895	1573041	40.9624	lexA
Rhodobacterales	Sulfitobacter sp. AM1-D1 (a-proteobacteria)	GCA_001886735.1	gene3318	APE44838.1	anti-anti-sigma factor	CP018076.1	3408410	+	BOO69_16595	3547966	92.3899	rsbV/W
Rhodobacterales	Sulfitobacter sp. AM1-D1 (a-proteobacteria)	GCA_001886735.1	gene1530	APE43307.1	hypothetical protein	CP018076.1	1586967	-	BOO69_07655	1726523	44.9591	gafA
Rhodobacterales	Marivivens sp. JLT3646 (a-proteobacteria)	GCA_001908835.1	gene2804	APO88032.1	amidophosphoribosyltransferase	CP018572.1	2806173	-	BSK21_14030	2947046	98.9558	comF
Rhodobacterales	Marivivens sp. JLT3646 (a-proteobacteria)	GCA_001908835.1	gene1497	APO86885.1	competence protein	CP018572.1	1508406	-	BSK21_07495	1649279	55.3794	comEC
Rhodobacterales	Marivivens sp. JLT3646 (a-proteobacteria)	GCA_001908835.1	gene1209	APO86630.1	recombinase RecA	CP018572.1	1214788	+	BSK21_06055	1355661	45.5203	recA
Rhodobacterales	Marivivens sp. JLT3646 (a-proteobacteria)	GCA_001908835.1	gene2253	APO87560.1	AAA family ATPase	CP018572.1	2265805	+	BSK21_11275	2406678	80.8113	comM
Rhodobacterales	Marivivens sp. JLT3646 (a-proteobacteria)	GCA_001908835.1	gene1328	APO88308.1	helix-turn-helix domain containing protein	CP018572.1	1343718	-	BSK21_06650	1484591	49.8495	gafA
Rhodobacterales	Marivivens sp. JLT3646 (a-proteobacteria)	GCA_001908835.1	gene1496	APO86884.1	repressor LexA	CP018572.1	1507720	+	BSK21_07490	1648593	55.3564	lexA
Rhodobacterales	Marivivens sp. JLT3646 (a-proteobacteria)	GCA_001908835.1	gene1329	APO86730.1	hypothetical protein	CP018572.1	1345025	+	BSK21_06655	1485898	49.8934	gafA
Rhodobacterales	Thioclava nitratireducens (a-proteobacteria)	GCA_001940525.2	gene2869	AQS49914.1	hypothetical protein	CP019437.1	2997270	-	BMG03_14350	2621603	67.037	comEC
Rhodobacterales	Thioclava nitratireducens (a-proteobacteria)	GCA_001940525.2	gene301	AQS49651.1	amidophosphoribosyltransferase	CP019437.1	291686	+	BMG03_01510	3826700	97.8525	comF
Rhodobacterales	Thioclava nitratireducens (a-proteobacteria)	GCA_001940525.2	gene2075	AQS48160.1	recombinase RecA	CP019437.1	2151837	+	BMG03_10380	1776170	45.4184	recA
Rhodobacterales	Thioclava nitratireducens (a-proteobacteria)	GCA_001940525.2	gene3704	AQS49994.1	hypothetical protein	CP019437.1	3833909	+	BMG03_18525	3458242	88.4307	rsbV/W
Rhodobacterales	Thioclava nitratireducens (a-proteobacteria)	GCA_001940525.2	gene1823	AQS47950.1	helix-turn-helix domain containing protein	CP019437.1	1894754	+	BMG03_09120	1519087	38.8446	gafA
Rhodobacterales	Thioclava nitratireducens (a-proteobacteria)	GCA_001940525.2	gene3280	AQS49192.1	AAA family ATPase	CP019437.1	3417499	+	BMG03_16405	3041832	77.7827	comM
Rhodobacterales	Thioclava nitratireducens (a-proteobacteria)	GCA_001940525.2	gene2868	AQS48837.1	repressor LexA	CP019437.1	2996444	+	BMG03_14345	2620777	67.0159	lexA
Rhodobacterales	Thioclava nitratireducens (a-proteobacteria)	GCA_001940525.2	gene3703	AQS49565.1	anti-anti-sigma factor	CP019437.1	3833500	+	BMG03_18520	3457833	88.4202	rsbV/W
Rhodobacterales	Paracoccus yeei (a-proteobacteria)	GCA_002073635.2	gene2481	ARC37475.1	recombinase RecA	CP020442.2	2525549	+	A6J80_14850	1024892	28.2953	recA
Rhodobacterales	Paracoccus yeei (a-proteobacteria)	GCA_002073635.2	gene5	ARC35400.1	helix-turn-helix domain containing protein	CP020442.2	7351	-	A6J80_02475	2128821	58.7727	gafA
Rhodobacterales	Paracoccus yeei (a-proteobacteria)	GCA_002073635.2	gene1064	ARC36287.1	ATP-binding protein	CP020442.2	1087530	+	A6J80_07750	3209000	88.5944	rsbV/W
Rhodobacterales	Paracoccus yeei (a-proteobacteria)	GCA_002073635.2	gene1063	ARC36286.1	anti-sigma factor antagonist	CP020442.2	1087174	+	A6J80_07745	3208644	88.5845	rsbV/W
Rhodobacterales	Paracoccus yeei (a-proteobacteria)	GCA_002073635.2	gene1834	ARC36929.1	ComF family protein	CP020442.2	1858199	-	A6J80_11605	357542	9.87105	comF
Rhodobacterales	Paracoccus yeei (a-proteobacteria)	GCA_002073635.2	gene2543	ARC37527.1	transcriptional repressor LexA	CP020442.2	2592069	-	A6J80_15160	1091412	30.1318	lexA
Rhodobacterales	Ketogulonicigenium robustum (a-proteobacteria)	GCA_002117445.1	gene1755	ARO15054.1	competence protein ComEC	CP019937.1	1709041	-	BVG79_01710	1819760	74.2012	comEC
Rhodobacterales	Ketogulonicigenium robustum (a-proteobacteria)	GCA_002117445.1	gene1066	ARO14381.1	recombinase A	CP019937.1	1016463	+	BVG79_01035	1127182	45.9611	recA
Rhodobacterales	Ketogulonicigenium robustum (a-proteobacteria)	GCA_002117445.1	gene1452	ARO14763.1	hypothetical protein	CP019937.1	1382272	-	BVG79_01417	1492991	60.8771	gafA
Rhodobacterales	Ketogulonicigenium robustum (a-proteobacteria)	GCA_002117445.1	gene889	ARO14212.1	LexA repressor	CP019937.1	848849	-	BVG79_00860	959568	39.1266	lexA
Rhodobacterales	Ketogulonicigenium robustum (a-proteobacteria)	GCA_002117445.1	gene277	ARO13623.1	magnesium chelatase family protein	CP019937.1	256094	-	BVG79_00263	366813	14.9569	comM
Rhodobacterales	Ketogulonicigenium robustum (a-proteobacteria)	GCA_002117445.1	gene2382	ARO15667.1	Competence protein F	CP019937.1	2312438	-	BVG79_02327	2423157	98.8049	comF
Rhodobacterales	Ketogulonicigenium robustum (a-proteobacteria)	GCA_002117445.1	gene1453	ARO14764.1	hypothetical protein	CP019937.1	1383588	+	BVG79_01418	1494307	60.9308	gafA
Rhodobacterales	Sulfitobacter pseudonitzschiae (a-proteobacteria)	GCA_002222635.1	gene2940	ASM73730.1	serine-protein kinase RsbW	CP022415.1	2957125	+	SULPSESMR1_02949	3331230	93.2479	rsbV/W
Rhodobacterales	Sulfitobacter pseudonitzschiae (a-proteobacteria)	GCA_002222635.1	gene1776	ASM72591.1	LexA repressor	CP022415.1	1820975	+	SULPSESMR1_01783	2195080	61.4448	lexA
Rhodobacterales	Sulfitobacter pseudonitzschiae (a-proteobacteria)	GCA_002222635.1	gene1777	ASM72592.1	ComE operon protein 3	CP022415.1	1822074	-	SULPSESMR1_01784	2196179	61.4755	comEC
Rhodobacterales	Sulfitobacter pseudonitzschiae (a-proteobacteria)	GCA_002222635.1	gene3116	ASM73902.1	DNA utilization protein GntX	CP022415.1	3132976	-	SULPSESMR1_03125	3507081	98.1703	comF
Rhodobacterales	Sulfitobacter pseudonitzschiae (a-proteobacteria)	GCA_002222635.1	gene54	ASM70896.1	competence protein ComM	CP022415.1	60002	-	SULPSESMR1_00055	434107	12.1515	comM
Rhodobacterales	Sulfitobacter pseudonitzschiae (a-proteobacteria)	GCA_002222635.1	gene2939	ASM73729.1	putative anti-sigma factor antagonist	CP022415.1	2956779	+	SULPSESMR1_02948	3330884	93.2382	rsbV/W
Rhodobacterales	Sulfitobacter pseudonitzschiae (a-proteobacteria)	GCA_002222635.1	gene1575	ASM72394.1	DNA recombination/repair protein RecA	CP022415.1	1605418	-	SULPSESMR1_01580	1979523	55.4109	recA
Rhodobacterales	Sulfitobacter pseudonitzschiae (a-proteobacteria)	GCA_002222635.1	gene1642	ASM72460.1	hypothetical protein	CP022415.1	1682490	+	SULPSESMR1_01647	2056595	57.5683	gafA
Rhodobacterales	Sulfitobacter pseudonitzschiae (a-proteobacteria)	GCA_002222635.1	gene1641	ASM72459.1	helix-turn-helix domain containing protein	CP022415.1	1681085	-	SULPSESMR1_01646	2055190	57.5289	gafA
Rhodobacterales	Phaeobacter piscinae (a-proteobacteria)	GCA_002407245.1	gene3259	ATG41318.1	phosphoribosyl transferase-like protein	CP010681.1	3427868	-	PhaeoP14_03281	3562848	98.771	comF
Rhodobacterales	Phaeobacter piscinae (a-proteobacteria)	GCA_002407245.1	gene1363	ATG39476.1	hypothetical protein	CP010681.1	1456052	+	PhaeoP14_01370	1591032	44.1074	gafA
Rhodobacterales	Phaeobacter piscinae (a-proteobacteria)	GCA_002407245.1	gene1587	ATG39694.1	SOS-response transcriptional repressor%2C LexA	CP010681.1	1704620	+	PhaeoP14_01594	1839600	50.9983	lexA
Rhodobacterales	Phaeobacter piscinae (a-proteobacteria)	GCA_002407245.1	gene3098	ATG41159.1	putative serine-protein kinase (anti-sigma-B factor)	CP010681.1	3259632	+	PhaeoP14_03118	3394612	94.1071	rsbV/W
Rhodobacterales	Phaeobacter piscinae (a-proteobacteria)	GCA_002407245.1	gene3097	ATG41158.1	putative anti-sigma-B factor antagonist	CP010681.1	3259252	+	PhaeoP14_03117	3394232	94.0965	rsbV/W
Rhodobacterales	Phaeobacter piscinae (a-proteobacteria)	GCA_002407245.1	gene2402	ATG40486.1	putative magnesium chelatase	CP010681.1	2553755	+	PhaeoP14_02415	2688735	74.5384	comM
Rhodobacterales	Phaeobacter piscinae (a-proteobacteria)	GCA_002407245.1	gene1423	ATG39535.1	protein recA (recombinase A)	CP010681.1	1525238	+	PhaeoP14_01430	1660218	46.0254	recA
Rhodobacterales	Phaeobacter piscinae (a-proteobacteria)	GCA_002407245.1	gene1362	ATG39475.1	hypothetical protein	CP010681.1	1455516	-	PhaeoP14_01369	1590496	44.0925	gafA
Rhodobacterales	Phaeobacter piscinae (a-proteobacteria)	GCA_002407245.1	gene1588	ATG39695.1	ComEC/Rec2-related protein	CP010681.1	1705693	-	PhaeoP14_01595	1840673	51.028	comEC
Rhodobacterales	Celeribacter ethanolicus (a-proteobacteria)	GCA_002407265.1	gene1979	ATG47849.1	AAA family ATPase	CP022196.1	2006940	+	CEW89_09905	3391746	84.5975	comM
Rhodobacterales	Celeribacter ethanolicus (a-proteobacteria)	GCA_002407265.1	gene1026	ATG47008.1	hypothetical protein	CP022196.1	1064019	+	CEW89_05140	2448825	61.079	gafA
Rhodobacterales	Celeribacter ethanolicus (a-proteobacteria)	GCA_002407265.1	gene2363	ATG48191.1	anti-anti-sigma factor	CP022196.1	2406773	+	CEW89_11825	3791579	94.5702	rsbV/W
Rhodobacterales	Celeribacter ethanolicus (a-proteobacteria)	GCA_002407265.1	gene2364	ATG48192.1	serine/threonine protein kinase	CP022196.1	2407107	+	CEW89_11830	3791913	94.5785	rsbV/W
Rhodobacterales	Celeribacter ethanolicus (a-proteobacteria)	GCA_002407265.1	gene2550	ATG48357.1	amidophosphoribosyltransferase	CP022196.1	2591699	-	CEW89_12760	3976505	99.1826	comF
Rhodobacterales	Celeribacter ethanolicus (a-proteobacteria)	GCA_002407265.1	gene1060	ATG47041.1	DNA recombination/repair protein RecA	CP022196.1	1096678	-	CEW89_05310	2481484	61.8936	recA
Rhodobacterales	Celeribacter ethanolicus (a-proteobacteria)	GCA_002407265.1	gene1379	ATG47322.1	repressor LexA	CP022196.1	1427861	+	CEW89_06905	2812667	70.154	lexA
Rhodobacterales	Celeribacter ethanolicus (a-proteobacteria)	GCA_002407265.1	gene1380	ATG49730.1	competence protein	CP022196.1	1428638	-	CEW89_06910	2813444	70.1734	comEC
Rhodobacterales	Celeribacter ethanolicus (a-proteobacteria)	GCA_002407265.1	gene1025	ATG47007.1	helix-turn-helix domain containing protein	CP022196.1	1062490	-	CEW89_05135	2447296	61.0408	gafA
Rhodobacterales	Paracoccus sp. BM15 (a-proteobacteria)	GCA_002847305.1	gene509	AUH32419.1	AAA family ATPase	CP025408.1	508076	+	CUV01_02555	2764438	73.5245	comM
Rhodobacterales	Paracoccus sp. BM15 (a-proteobacteria)	GCA_002847305.1	gene1390	AUH33163.1	ATP-binding protein	CP025408.1	1399739	+	CUV01_06960	3656101	97.2397	rsbV/W
Rhodobacterales	Paracoccus sp. BM15 (a-proteobacteria)	GCA_002847305.1	gene2332	AUH35396.1	competence protein ComEC	CP025408.1	2382869	-	CUV01_11670	879345	23.3875	comEC
Rhodobacterales	Paracoccus sp. BM15 (a-proteobacteria)	GCA_002847305.1	gene1389	AUH33162.1	anti-sigma factor antagonist	CP025408.1	1399407	+	CUV01_06955	3655769	97.2308	rsbV/W
Rhodobacterales	Paracoccus sp. BM15 (a-proteobacteria)	GCA_002847305.1	gene161	AUH35109.1	recombinase RecA	CP025408.1	167310	-	CUV01_00815	2423672	64.4613	recA
Rhodobacterales	Paracoccus sp. BM15 (a-proteobacteria)	GCA_002847305.1	gene1971	AUH35350.1	amidophosphoribosyltransferase	CP025408.1	2018693	-	CUV01_09865	515169	13.7017	comF
Rhodobacterales	Paracoccus sp. BM15 (a-proteobacteria)	GCA_002847305.1	gene2708	AUH34275.1	repressor LexA	CP025408.1	2778316	-	CUV01_13550	1274792	33.9051	lexA
Rhodobacterales	Paracoccus sp. BM15 (a-proteobacteria)	GCA_002847305.1	gene3325	AUH34791.1	helix-turn-helix domain containing protein	CP025408.1	3383594	-	CUV01_16635	1880070	50.0034	gafA
Rhodobacterales	Paracoccus zhejiangensis (a-proteobacteria)	GCA_002847445.1	gene3010	AUH65322.1	anti-sigma factor antagonist	CP025430.1	3111102	-	CX676_15060	250002	6.2734	rsbV/W
Rhodobacterales	Paracoccus zhejiangensis (a-proteobacteria)	GCA_002847445.1	gene3009	AUH65321.1	ATP-binding protein	CP025430.1	3110539	-	CX676_15055	249439	6.25927	rsbV/W
Rhodobacterales	Paracoccus zhejiangensis (a-proteobacteria)	GCA_002847445.1	gene3751	AUH65947.1	AAA family ATPase	CP025430.1	3861576	-	CX676_18765	1000476	25.1053	comM
Rhodobacterales	Paracoccus zhejiangensis (a-proteobacteria)	GCA_002847445.1	gene952	AUH66168.1	helix-turn-helix domain containing protein	CP025430.1	949211	-	CX676_04770	2073223	52.0242	gafA
Rhodobacterales	Paracoccus zhejiangensis (a-proteobacteria)	GCA_002847445.1	gene2280	AUH66308.1	amidophosphoribosyltransferase	CP025430.1	2352875	+	CX676_11410	3476887	87.2469	comF
Rhodobacterales	Paracoccus zhejiangensis (a-proteobacteria)	GCA_002847445.1	gene980	AUH63584.1	recombinase RecA	CP025430.1	989836	-	CX676_04910	2113848	53.0436	recA
Rhodobacterales	Paracoccus zhejiangensis (a-proteobacteria)	GCA_002847445.1	gene1300	AUH63854.1	repressor LexA	CP025430.1	1327761	+	CX676_06510	2451773	61.5233	lexA
Rhodobacterales	Rhodobacteraceae bacterium (a-proteobacteria)	GCA_002850435.1	gene1167	AUJ63860.1	competence protein	CP021114.1	1153670	+	B9057_05840	1217309	42.9068	comEC
Rhodobacterales	Rhodobacteraceae bacterium (a-proteobacteria)	GCA_002850435.1	gene467	AUJ63233.1	AAA family ATPase	CP021114.1	447367	-	B9057_02340	511006	18.0115	comM
Rhodobacterales	Rhodobacteraceae bacterium (a-proteobacteria)	GCA_002850435.1	gene1373	AUJ64048.1	hypothetical protein	CP021114.1	1371568	-	B9057_06870	1435207	50.5871	gafA
Rhodobacterales	Rhodobacteraceae bacterium (a-proteobacteria)	GCA_002850435.1	gene2735	AUJ65546.1	hypothetical protein	CP021114.1	2742363	-	B9057_13680	2806002	98.9038	comF
Rhodobacterales	Rhodobacteraceae bacterium (a-proteobacteria)	GCA_002850435.1	gene1491	AUJ64154.1	recombinase RecA	CP021114.1	1503027	-	B9057_07460	1566666	55.2206	recA
Rhodobacterales	Rhodobacteraceae bacterium (a-proteobacteria)	GCA_002850435.1	gene1168	AUJ63861.1	repressor LexA	CP021114.1	1155685	-	B9057_05845	1219324	42.9778	lexA
Rhodobacterales	Rhodobacteraceae bacterium (a-proteobacteria)	GCA_002850435.1	gene1374	AUJ65454.1	helix-turn-helix domain containing protein	CP021114.1	1372092	+	B9057_06875	1435731	50.6055	gafA
Rhodobacterales	Paracoccus jeotgali (a-proteobacteria)	GCA_002865605.1	gene2300	AUM74820.1	AAA family ATPase	CP025583.1	2359154	+	CYR75_11510	2784619	89.2181	comM
Rhodobacterales	Paracoccus jeotgali (a-proteobacteria)	GCA_002865605.1	gene1399	AUM74053.1	competence protein ComEC	CP025583.1	1428459	-	CYR75_07005	1853924	59.399	comEC
Rhodobacterales	Paracoccus jeotgali (a-proteobacteria)	GCA_002865605.1	gene1238	AUM75567.1	helix-turn-helix domain containing protein	CP025583.1	1259969	+	CYR75_06200	1685434	54.0007	gafA
Rhodobacterales	Paracoccus jeotgali (a-proteobacteria)	GCA_002865605.1	gene520	AUM73331.1	recombinase RecA	CP025583.1	518659	+	CYR75_02610	944124	30.2494	recA
Rhodobacterales	Paracoccus jeotgali (a-proteobacteria)	GCA_002865605.1	gene433	AUM73256.1	anti-sigma factor antagonist	CP025583.1	437631	-	CYR75_02175	863096	27.6533	rsbV/W
Rhodobacterales	Paracoccus jeotgali (a-proteobacteria)	GCA_002865605.1	gene118	AUM75436.1	amidophosphoribosyltransferase	CP025583.1	117996	+	CYR75_00600	543461	17.4123	comF
Rhodobacterales	Paracoccus jeotgali (a-proteobacteria)	GCA_002865605.1	gene432	AUM73255.1	ATP-binding protein	CP025583.1	437152	-	CYR75_02170	862617	27.6379	rsbV/W
Rhodobacterales	Paracoccus jeotgali (a-proteobacteria)	GCA_002865605.1	gene1430	AUM74078.1	repressor LexA	CP025583.1	1459896	+	CYR75_07160	1885361	60.4062	lexA
Rhodobacterales	Rhodobacteraceae bacterium SH-1 (a-proteobacteria)	GCA_003008555.1	gene1740	AVO37772.1	anti-sigma factor antagonist	CP027665.1	1761005	-	C6Y53_08710	60841	1.56318	rsbV/W
Rhodobacterales	Rhodobacteraceae bacterium SH-1 (a-proteobacteria)	GCA_003008555.1	gene2122	AVO38116.1	AAA family ATPase	CP027665.1	2138993	-	C6Y53_10620	438829	11.2748	comM
Rhodobacterales	Rhodobacteraceae bacterium SH-1 (a-proteobacteria)	GCA_003008555.1	gene3640	AVO39894.1	helix-turn-helix domain containing protein	CP027665.1	3767631	+	C6Y53_18210	2067467	53.1191	gafA
Rhodobacterales	Rhodobacteraceae bacterium SH-1 (a-proteobacteria)	GCA_003008555.1	gene3639	AVO39433.1	hypothetical protein	CP027665.1	3767101	-	C6Y53_18205	2066937	53.1054	gafA
Rhodobacterales	Rhodobacteraceae bacterium SH-1 (a-proteobacteria)	GCA_003008555.1	gene3415	AVO39253.1	competence protein	CP027665.1	3512210	+	C6Y53_17085	1812046	46.5566	comEC
Rhodobacterales	Rhodobacteraceae bacterium SH-1 (a-proteobacteria)	GCA_003008555.1	gene3416	AVO39254.1	repressor LexA	CP027665.1	3514261	-	C6Y53_17090	1814097	46.6093	lexA
Rhodobacterales	Rhodobacteraceae bacterium SH-1 (a-proteobacteria)	GCA_003008555.1	gene3409	AVO39864.1	recombinase RecA	CP027665.1	3504619	+	C6Y53_17055	1804455	46.3615	recA
Rhodobacterales	Rhodobacteraceae bacterium SH-1 (a-proteobacteria)	GCA_003008555.1	gene1852	AVO37872.1	amidophosphoribosyltransferase	CP027665.1	1869313	+	C6Y53_09270	169149	4.34591	comF
Rhodobacterales	Rhodobacteraceae bacterium SH-1 (a-proteobacteria)	GCA_003008555.1	gene1739	AVO37771.1	ATP-binding protein	CP027665.1	1760556	-	C6Y53_08705	60392	1.55164	rsbV/W
Rhodobacterales	Gemmobacter sp. HYN0069 (a-proteobacteria)	GCA_003060865.1	gene1667	AWB48518.1	recombinase RecA	CP028918.1	1731992	-	HYN69_08340	1822227	49.3217	recA
Rhodobacterales	Gemmobacter sp. HYN0069 (a-proteobacteria)	GCA_003060865.1	gene3272	AWB49870.1	anti-sigma factor antagonist	CP028918.1	3385119	-	HYN69_16365	3475354	94.0664	rsbV/W
Rhodobacterales	Gemmobacter sp. HYN0069 (a-proteobacteria)	GCA_003060865.1	gene1700	AWB48547.1	helix-turn-helix domain containing protein	CP028918.1	1766668	-	HYN69_08505	1856903	50.2602	gafA
Rhodobacterales	Gemmobacter sp. HYN0069 (a-proteobacteria)	GCA_003060865.1	gene1464	AWB48350.1	competence protein	CP028918.1	1530563	+	HYN69_07325	1620798	43.8697	comEC
Rhodobacterales	Gemmobacter sp. HYN0069 (a-proteobacteria)	GCA_003060865.1	gene3524	AWB50082.1	amidophosphoribosyltransferase	CP028918.1	3640149	+	HYN69_17625	35808	0.969205	comF
Rhodobacterales	Gemmobacter sp. HYN0069 (a-proteobacteria)	GCA_003060865.1	gene1465	AWB48351.1	repressor LexA	CP028918.1	1532575	-	HYN69_07330	1622810	43.9241	lexA
Rhodobacterales	Gemmobacter sp. HYN0069 (a-proteobacteria)	GCA_003060865.1	gene3271	AWB49869.1	ATP-binding protein	CP028918.1	3384705	-	HYN69_16360	3474940	94.0552	rsbV/W
Rhodobacterales	Rhodobacter blasticus (a-proteobacteria)	GCA_003071405.1	gene-B6K69_02365	AWD20639.1	recombinase RecA	CP020470.1	489065	-	B6K69_02365	1799432	50.7033	recA
Rhodobacterales	Rhodobacter blasticus (a-proteobacteria)	GCA_003071405.1	gene-B6K69_11660	AWD22254.1	anti-anti-sigma factor	CP020470.1	2399732	+	B6K69_11660	161151	4.54081	rsbV/W
Rhodobacterales	Rhodobacter blasticus (a-proteobacteria)	GCA_003071405.1	gene-B6K69_10740	AWD23454.1	amidophosphoribosyltransferase	CP020470.1	2201602	-	B6K69_10740	3511969	98.958	comF
Rhodobacterales	Rhodobacter blasticus (a-proteobacteria)	GCA_003071405.1	gene-B6K69_03810	AWD23290.1	competence protein	CP020470.1	798112	-	B6K69_03810	2108479	59.4114	comEC
Rhodobacterales	Rhodobacter blasticus (a-proteobacteria)	GCA_003071405.1	gene-B6K69_02215	AWD23267.1	hypothetical protein	CP020470.1	456874	+	B6K69_02215	1767241	49.7962	gafA
Rhodobacterales	Rhodobacter blasticus (a-proteobacteria)	GCA_003071405.1	gene-B6K69_02210	AWD20611.1	helix-turn-helix domain containing protein	CP020470.1	455532	-	B6K69_02210	1765899	49.7584	gafA
Rhodobacterales	Rhodobacter blasticus (a-proteobacteria)	GCA_003071405.1	gene-B6K69_03805	AWD20900.1	repressor LexA	CP020470.1	797432	+	B6K69_03805	2107799	59.3922	lexA
Rhodobacterales	Rhodobacter blasticus (a-proteobacteria)	GCA_003071405.1	gene-B6K69_06670	AWD21395.1	AAA family ATPase	CP020470.1	1375668	+	B6K69_06670	2686035	75.6854	comM
Rhodobacterales	Rhodobacter blasticus (a-proteobacteria)	GCA_003071405.1	gene-B6K69_11665	AWD22255.1	hypothetical protein	CP020470.1	2400087	+	B6K69_11665	161506	4.55081	rsbV/W
Rhodobacterales	Paracoccus mutanolyticus (a-proteobacteria)	GCA_003285265.1	gene1169	AWX92855.1	ATP-binding protein	CP030239.1	1079767	+	DPM13_05855	3180568	88.5371	rsbV/W
Rhodobacterales	Paracoccus mutanolyticus (a-proteobacteria)	GCA_003285265.1	gene5	AWX92237.1	helix-turn-helix domain-containing protein	CP030239.1	7342	-	DPM13_00035	2108143	58.6841	gafA
Rhodobacterales	Paracoccus mutanolyticus (a-proteobacteria)	GCA_003285265.1	gene1168	AWX92854.1	anti-sigma factor antagonist	CP030239.1	1079411	+	DPM13_05850	3180212	88.5272	rsbV/W
Rhodobacterales	Paracoccus mutanolyticus (a-proteobacteria)	GCA_003285265.1	gene2780	AWX93760.1	transcriptional repressor LexA	CP030239.1	2573427	-	DPM13_13910	1081871	30.1159	lexA
Rhodobacterales	Sulfitobacter sp. JL08 (a-proteobacteria)	GCA_003352045.1	gene1925	AXI56917.1	helix-turn-helix domain containing protein	CP025815.1	1954674	+	C1J05_09630	2058607	47.6123	gafA
Rhodobacterales	Sulfitobacter sp. JL08 (a-proteobacteria)	GCA_003352045.1	gene1924	AXI54721.1	hypothetical protein	CP025815.1	1954100	-	C1J05_09625	2058033	47.599	gafA
Rhodobacterales	Sulfitobacter sp. JL08 (a-proteobacteria)	GCA_003352045.1	gene112	AXI53194.1	anti-sigma factor antagonist	CP025815.1	120015	-	C1J05_00565	223948	5.17956	rsbV/W
Rhodobacterales	Sulfitobacter sp. JL08 (a-proteobacteria)	GCA_003352045.1	gene2102	AXI54871.1	recombinase RecA	CP025815.1	2131166	-	C1J05_10515	2235099	51.6942	recA
Rhodobacterales	Sulfitobacter sp. JL08 (a-proteobacteria)	GCA_003352045.1	gene4093	AXI56566.1	amidophosphoribosyltransferase	CP025815.1	4180476	-	C1J05_20470	4284409	99.0915	comF
Rhodobacterales	Sulfitobacter sp. JL08 (a-proteobacteria)	GCA_003352045.1	gene111	AXI53193.1	hypothetical protein	CP025815.1	119549	-	C1J05_00560	223482	5.16878	rsbV/W
Rhodobacterales	Sulfitobacter sp. JL08 (a-proteobacteria)	GCA_003352045.1	gene3577	AXI56119.1	AAA family ATPase	CP025815.1	3640759	+	C1J05_17890	3744692	86.6087	comM
Rhodobacterales	Sulfitobacter sp. JL08 (a-proteobacteria)	GCA_003352045.1	gene1819	AXI54630.1	repressor LexA	CP025815.1	1838816	-	C1J05_09100	1942749	44.9327	lexA
Rhodobacterales	Sulfitobacter sp. SK025 (a-proteobacteria)	GCA_003352105.1	gene1925	AXI51159.1	helix-turn-helix domain containing protein	CP025808.1	1987346	+	C1J04_09635	1586957	52.2825	gafA
Rhodobacterales	Sulfitobacter sp. SK025 (a-proteobacteria)	GCA_003352105.1	gene2196	AXI51404.1	DUF4131 domain-containing protein	CP025808.1	2260766	-	C1J04_10990	1860377	61.2904	comEC
Rhodobacterales	Sulfitobacter sp. SK025 (a-proteobacteria)	GCA_003352105.1	gene115	AXI52145.1	anti-sigma factor antagonist	CP025808.1	129141	+	C1J04_00585	2764102	91.0637	rsbV/W
Rhodobacterales	Sulfitobacter sp. SK025 (a-proteobacteria)	GCA_003352105.1	gene1924	AXI51158.1	hypothetical protein	CP025808.1	1986803	-	C1J04_09630	1586414	52.2646	gafA
Rhodobacterales	Sulfitobacter sp. SK025 (a-proteobacteria)	GCA_003352105.1	gene116	AXI49497.1	ATP-binding protein	CP025808.1	129431	+	C1J04_00590	2764392	91.0733	rsbV/W
Rhodobacterales	Sulfitobacter sp. SK025 (a-proteobacteria)	GCA_003352105.1	gene673	AXI50006.1	ATP-binding protein	CP025808.1	712663	-	C1J04_03375	312274	10.2879	comM
Rhodobacterales	Sulfitobacter sp. SK025 (a-proteobacteria)	GCA_003352105.1	gene406	AXI49768.1	amidophosphoribosyltransferase	CP025808.1	439060	+	C1J04_02040	38671	1.27402	comF
Rhodobacterales	Sulfitobacter sp. SK025 (a-proteobacteria)	GCA_003352105.1	gene1783	AXI51028.1	recombinase RecA	CP025808.1	1835559	+	C1J04_08925	1435170	47.2819	recA
Rhodobacterales	Sulfitobacter sp. SK025 (a-proteobacteria)	GCA_003352105.1	gene2195	AXI51403.1	transcriptional repressor LexA	CP025808.1	2260061	+	C1J04_10985	1859672	61.2671	lexA
Rhodobacterales	Phaeobacter sp. LSS9 (a-proteobacteria)	GCA_003443595.1	gene660	AXT36655.1	hypothetical protein	CP031956.1	671626	-	D1820_03310	1715321	46.9693	gafA
Rhodobacterales	Phaeobacter sp. LSS9 (a-proteobacteria)	GCA_003443595.1	gene2275	AXT35527.1	ATP-binding protein	CP031956.1	2362925	+	D1820_11385	3406620	93.2809	rsbV/W
Rhodobacterales	Phaeobacter sp. LSS9 (a-proteobacteria)	GCA_003443595.1	gene661	AXT36656.1	helix-turn-helix domain-containing protein	CP031956.1	672162	+	D1820_03315	1715857	46.984	gafA
Rhodobacterales	Phaeobacter sp. LSS9 (a-proteobacteria)	GCA_003443595.1	gene1609	AXT34926.1	ATP-binding protein	CP031956.1	1692062	+	D1820_08055	2735757	74.9112	comM
Rhodobacterales	Phaeobacter sp. LSS9 (a-proteobacteria)	GCA_003443595.1	gene721	AXT34136.1	recombinase RecA	CP031956.1	741340	+	D1820_03615	1785035	48.8783	recA
Rhodobacterales	Phaeobacter sp. LSS9 (a-proteobacteria)	GCA_003443595.1	gene887	AXT34283.1	ComEC family competence protein	CP031956.1	920920	-	D1820_04445	1964615	53.7956	comEC
Rhodobacterales	Phaeobacter sp. LSS9 (a-proteobacteria)	GCA_003443595.1	gene886	AXT34282.1	transcriptional repressor LexA	CP031956.1	919849	+	D1820_04440	1963544	53.7663	lexA
Rhodobacterales	Phaeobacter sp. LSS9 (a-proteobacteria)	GCA_003443595.1	gene2464	AXT35699.1	ComF family protein	CP031956.1	2563967	-	D1820_12330	3607662	98.7859	comF
Rhodobacterales	Phaeobacter sp. LSS9 (a-proteobacteria)	GCA_003443595.1	gene2274	AXT35526.1	anti-sigma factor antagonist	CP031956.1	2362546	+	D1820_11380	3406241	93.2705	rsbV/W
Rhodobacterales	Sulfitobacter sp. D7 (a-proteobacteria)	GCA_003611275.1	gene1990	AYE87730.1	helix-turn-helix domain containing protein	CP020694.1	2056027	-	B5M07_09955	1937490	57.4737	gafA
Rhodobacterales	Sulfitobacter sp. D7 (a-proteobacteria)	GCA_003611275.1	gene1991	AYE86411.1	hypothetical protein	CP020694.1	2057396	+	B5M07_09960	1938859	57.5143	gafA
Rhodobacterales	Sulfitobacter sp. D7 (a-proteobacteria)	GCA_003611275.1	gene415	AYE87624.1	anti-anti-sigma factor	CP020694.1	430948	-	B5M07_02080	312411	9.26736	rsbV/W
Rhodobacterales	Sulfitobacter sp. D7 (a-proteobacteria)	GCA_003611275.1	gene1930	AYE86360.1	recombinase RecA	CP020694.1	1985021	-	B5M07_09655	1866484	55.3674	recA
Rhodobacterales	Sulfitobacter sp. D7 (a-proteobacteria)	GCA_003611275.1	gene1646	AYE86103.1	repressor LexA	CP020694.1	1700828	-	B5M07_08235	1582291	46.9371	lexA
Rhodobacterales	Sulfitobacter sp. D7 (a-proteobacteria)	GCA_003611275.1	gene1645	AYE86102.1	competence protein	CP020694.1	1698807	+	B5M07_08230	1580270	46.8771	comEC
Rhodobacterales	Sulfitobacter sp. D7 (a-proteobacteria)	GCA_003611275.1	gene414	AYE85001.1	serine/threonine protein kinase	CP020694.1	430479	-	B5M07_02075	311942	9.25344	rsbV/W
Rhodobacterales	Sulfitobacter sp. D7 (a-proteobacteria)	GCA_003611275.1	gene65	AYE84682.1	amidophosphoribosyltransferase	CP020694.1	81488	-	B5M07_00330	3334042	98.901	comF
Rhodobacterales	Sulfitobacter sp. D7 (a-proteobacteria)	GCA_003611275.1	gene571	AYE85138.1	AAA family ATPase	CP020694.1	578380	-	B5M07_02860	459843	13.6408	comM
Rhodobacterales	Tabrizicola piscis (a-proteobacteria)	GCA_003940805.1	gene3685	AZL61274.1	ComEC family competence protein	CP034328.1	3795049	+	EI545_18435	2889098	68.9668	comEC
Rhodobacterales	Tabrizicola piscis (a-proteobacteria)	GCA_003940805.1	gene366	AZL57693.1	helix-turn-helix domain-containing protein	CP034328.1	391565	-	EI545_01840	3674726	87.7209	gafA
Rhodobacterales	Tabrizicola piscis (a-proteobacteria)	GCA_003940805.1	gene340	AZL57672.1	recombinase RecA	CP034328.1	362828	-	EI545_01710	3645989	87.0349	recA
Rhodobacterales	Tabrizicola piscis (a-proteobacteria)	GCA_003940805.1	gene2122	AZL59257.1	ComF family protein	CP034328.1	2178931	-	EI545_10620	1272980	30.3878	comF
Rhodobacterales	Tabrizicola piscis (a-proteobacteria)	GCA_003940805.1	gene367	AZL57694.1	hypothetical protein	CP034328.1	392923	+	EI545_01845	3676084	87.7533	gafA
Rhodobacterales	Tabrizicola piscis (a-proteobacteria)	GCA_003940805.1	gene3686	AZL60626.1	transcriptional repressor LexA	CP034328.1	3797061	-	EI545_18440	2891110	69.0149	lexA
Rhodobacterales	Tabrizicola piscis (a-proteobacteria)	GCA_003940805.1	gene1982	AZL59128.1	anti-sigma factor antagonist	CP034328.1	2030218	-	EI545_09920	1124267	26.8378	rsbV/W
Rhodobacterales	Tabrizicola piscis (a-proteobacteria)	GCA_003940805.1	gene2795	AZL59847.1	ATP-binding protein	CP034328.1	2863045	-	EI545_13985	1957094	46.7186	comM
Rhodobacterales	Tabrizicola piscis (a-proteobacteria)	GCA_003940805.1	gene1981	AZL59127.1	ATP-binding protein	CP034328.1	2029758	-	EI545_09915	1123807	26.8269	rsbV/W
Rhodobacterales	Paracoccus sp. Arc7-R13 (a-proteobacteria)	GCA_004010775.1	gene875	AZY93000.1	ComF family protein	CP034810.1	884533	-	EOJ32_04385	461240	14.2714	comF
Rhodobacterales	Paracoccus sp. Arc7-R13 (a-proteobacteria)	GCA_004010775.1	gene1015	AZY93126.1	ComEC family competence protein	CP034810.1	1021058	-	EOJ32_05085	597765	18.4956	comEC
Rhodobacterales	Paracoccus sp. Arc7-R13 (a-proteobacteria)	GCA_004010775.1	gene1886	AZY93864.1	transcriptional repressor LexA	CP034810.1	1899499	-	EOJ32_09440	1476206	45.6757	lexA
Rhodobacterales	Paracoccus sp. Arc7-R13 (a-proteobacteria)	GCA_004010775.1	gene1938	AZY93906.1	helix-turn-helix domain-containing protein	CP034810.1	1950882	+	EOJ32_09700	1527589	47.2655	gafA
Rhodobacterales	Paracoccus sp. Arc7-R13 (a-proteobacteria)	GCA_004010775.1	gene2282	AZY94217.1	recombinase RecA	CP034810.1	2291351	-	EOJ32_11420	1868058	57.8001	recA
Rhodobacterales	Paracoccus sp. Arc7-R13 (a-proteobacteria)	GCA_004010775.1	gene275	AZY92464.1	ATP-binding protein	CP034810.1	277679	-	EOJ32_01385	3086315	95.4945	rsbV/W
Rhodobacterales	Paracoccus sp. Arc7-R13 (a-proteobacteria)	GCA_004010775.1	gene276	AZY92465.1	anti-sigma factor antagonist	CP034810.1	278176	-	EOJ32_01390	3086812	95.5099	rsbV/W
Rhodobacterales	Paracoccus sp. Arc7-R13 (a-proteobacteria)	GCA_004010775.1	gene1499	AZY93529.1	ATP-binding protein	CP034810.1	1511219	-	EOJ32_07505	1087926	33.6618	comM
Rhodobacterales	Leisingera sp. NJS204 (a-proteobacteria)	GCA_004123675.1	gene-ETW24_19755	QAX31436.1	ComF family protein	CP035417.1	4063457	-	ETW24_19755	4200809	98.9342	comF
Rhodobacterales	Leisingera sp. NJS204 (a-proteobacteria)	GCA_004123675.1	gene-ETW24_10120	QAX29692.1	transcriptional repressor LexA	CP035417.1	2058965	+	ETW24_10120	2196317	51.726	lexA
Rhodobacterales	Leisingera sp. NJS204 (a-proteobacteria)	GCA_004123675.1	gene-ETW24_10125	QAX29693.1	ComEC family competence protein	CP035417.1	2059669	-	ETW24_10125	2197021	51.7425	comEC
Rhodobacterales	Leisingera sp. NJS204 (a-proteobacteria)	GCA_004123675.1	gene-ETW24_09455	QAX29568.1	recombinase RecA	CP035417.1	1927043	+	ETW24_09455	2064395	48.619	recA
Rhodobacterales	Leisingera sp. NJS204 (a-proteobacteria)	GCA_004123675.1	gene-ETW24_09105	QAX29504.1	helix-turn-helix domain-containing protein	CP035417.1	1847537	+	ETW24_09105	1984889	46.7466	gafA
Rhodobacterales	Leisingera sp. NJS204 (a-proteobacteria)	GCA_004123675.1	gene-ETW24_18665	QAX31238.1	anti-sigma factor antagonist	CP035417.1	3854113	+	ETW24_18665	3991465	94.0039	rsbV/W
Rhodobacterales	Leisingera sp. NJS204 (a-proteobacteria)	GCA_004123675.1	gene-ETW24_18670	QAX31805.1	ATP-binding protein	CP035417.1	3854493	+	ETW24_18670	3991845	94.0129	rsbV/W
Rhodobacterales	Leisingera sp. NJS204 (a-proteobacteria)	GCA_004123675.1	gene-ETW24_01930	QAX28253.1	ATP-binding protein	CP035417.1	377938	-	ETW24_01930	515290	12.1357	comM
Rhodobacterales	Epibacterium mobile (a-proteobacteria)	GCA_900574125.1	gene1711	VCU58786.1	DNA internalization-related competence protein ComEC/Rec2	LR027553.1	1742035	-	EPIB1_1684	678343	21.3058	comEC
Rhodobacterales	Epibacterium mobile (a-proteobacteria)	GCA_900574125.1	gene1710	VCU58785.1	SOS-response repressor and protease LexA	LR027553.1	1741271	+	EPIB1_1683	677579	21.2818	lexA
Rhodobacterales	Epibacterium mobile (a-proteobacteria)	GCA_900574125.1	gene244	VCU57347.1	Anti-sigma F factor antagonist (spoIIAA-2)%3B Anti-sigma B factor antagonist RsbV	LR027553.1	256260	-	EPIB1_245	2376416	74.6397	rsbV/W
Rhodobacterales	Epibacterium mobile (a-proteobacteria)	GCA_900574125.1	gene1515	VCU58596.1	Glutamate synthase [NADPH] large chain	LR027553.1	1540420	+	EPIB1_1494	476728	14.9733	gafA
Rhodobacterales	Epibacterium mobile (a-proteobacteria)	GCA_900574125.1	gene609	VCU57702.1	MG(2+) CHELATASE FAMILY PROTEIN / ComM-related protein	LR027553.1	615238	-	EPIB1_600	2735394	85.9147	comM
Rhodobacterales	Epibacterium mobile (a-proteobacteria)	GCA_900574125.1	gene1621	VCU58700.1	RecA protein	LR027553.1	1653610	-	EPIB1_1598	589918	18.5285	recA
Rhodobacterales	Epibacterium mobile (a-proteobacteria)	GCA_900574125.1	gene243	VCU57346.1	Anti-sigma F factor	LR027553.1	255786	-	EPIB1_244	2375942	74.6249	rsbV/W
